# Supplementary material for: Genetic Predisposition To Acquire a Polybasic Cleavage Site for Highly Pathogenic Avian Influenza Virus Hemagglutinin
Source: PubMed Central journal article supplement (PMC5312086; doi:10.1128/mbio.02298-16), 2017-02-14

# A Linker29

29nt

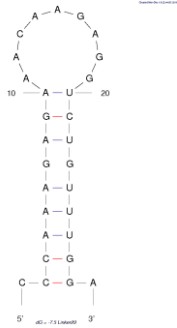

39nt

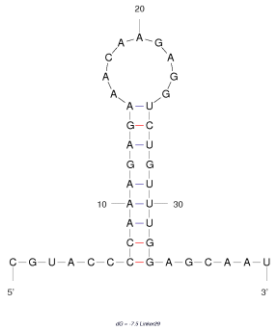

49nt

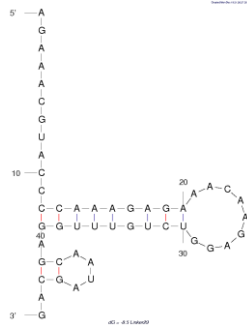

## Linker29-24a

29nt

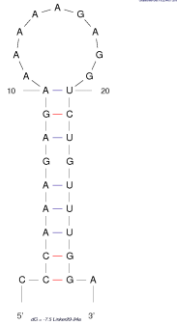

39nt

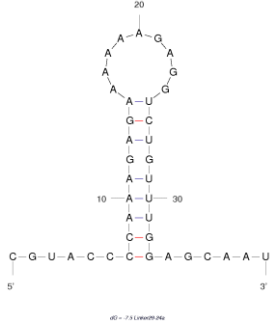

49nt

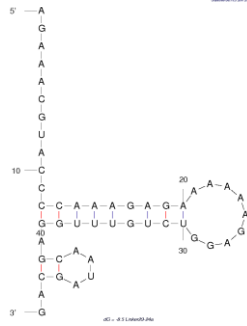

## Linker29-24a2b

29nt

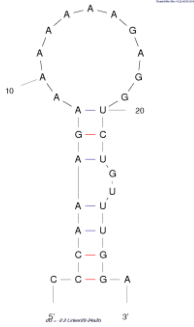

39nt

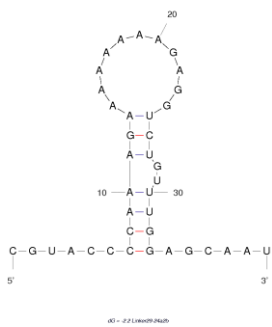

49nt

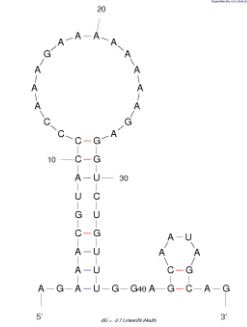

## Linker29-12A

29nt

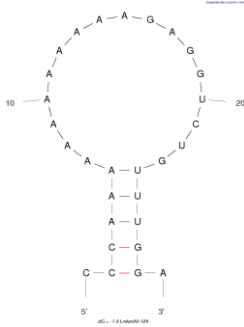

39nt

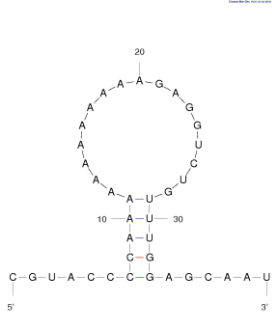

49nt

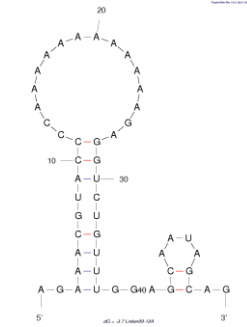

## Linker29-12A-NL

29nt

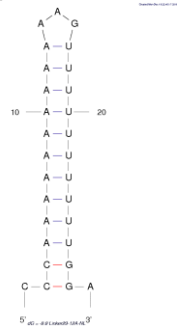

39nt

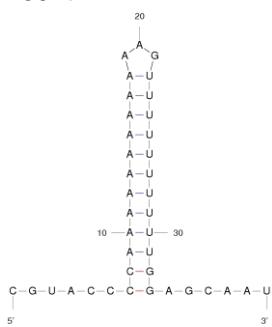

49nt

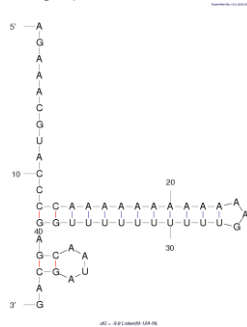

Fig. S2. Nao et al.

**B** Linker29

29nt

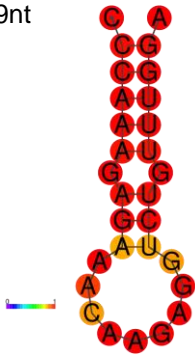

39nt

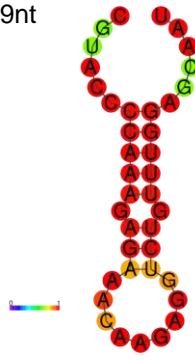

49nt

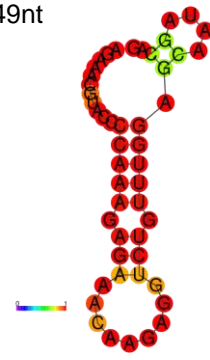

## Linker29-24a

29nt

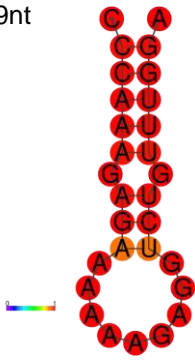

39nt

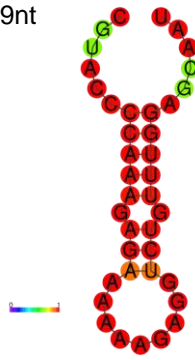

49nt

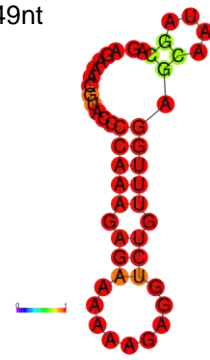

## Linker29-24a2b

29nt

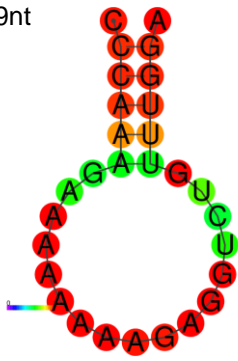

39nt

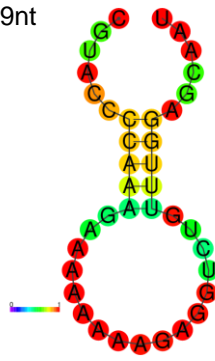

49nt

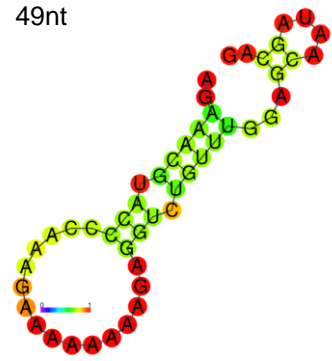

## Linker29-12A

29nt

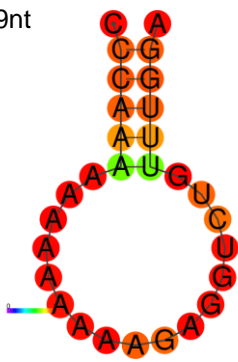

39nt

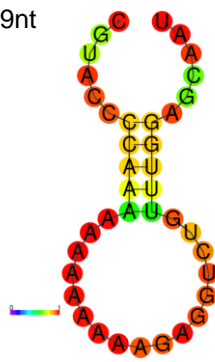

49nt

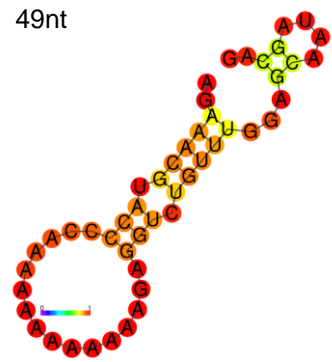

## Linker29-12A-NL

29nt

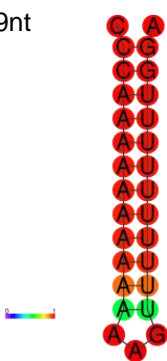

39nt

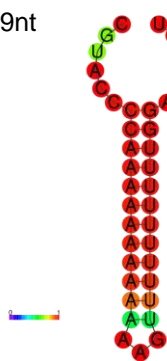

49nt

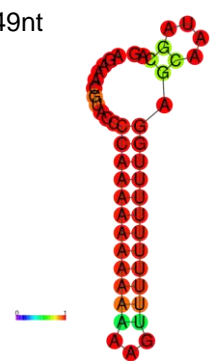

Supplement: mbo001173195sf2.pdf [file mbo001173195sf2.pdf]
