# Supplementary material for: Genetic Predisposition To Acquire a Polybasic Cleavage Site for Highly Pathogenic Avian Influenza Virus Hemagglutinin
Source: PubMed Central journal article supplement (PMC5312086; doi:10.1128/mbio.02298-16), 2017-02-14

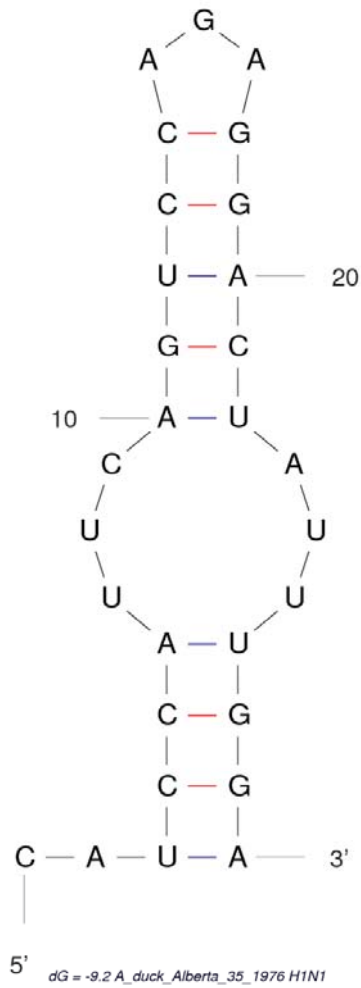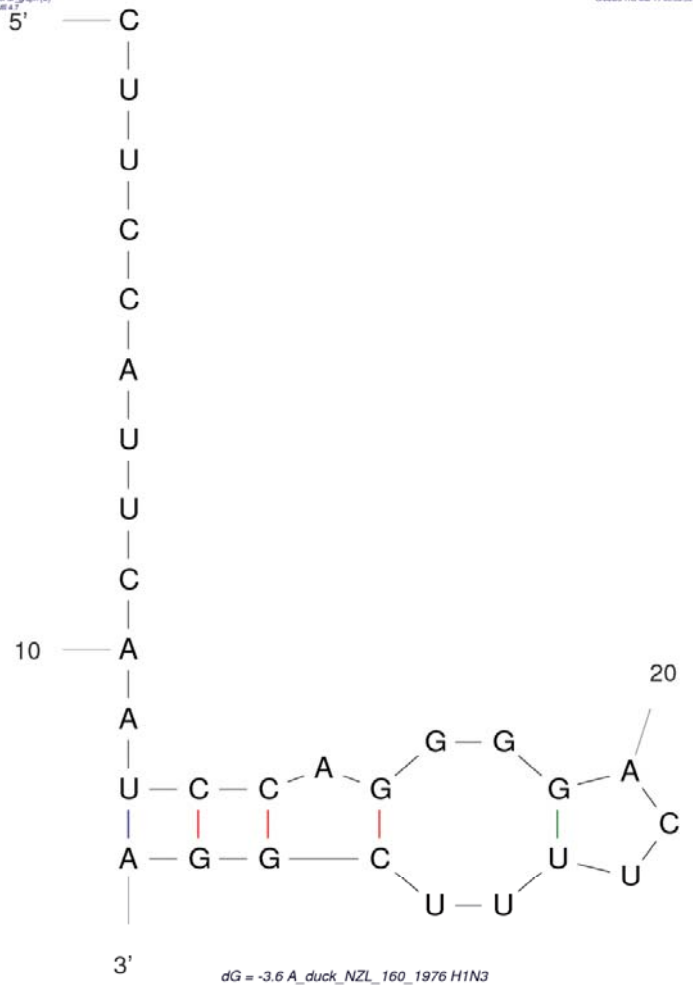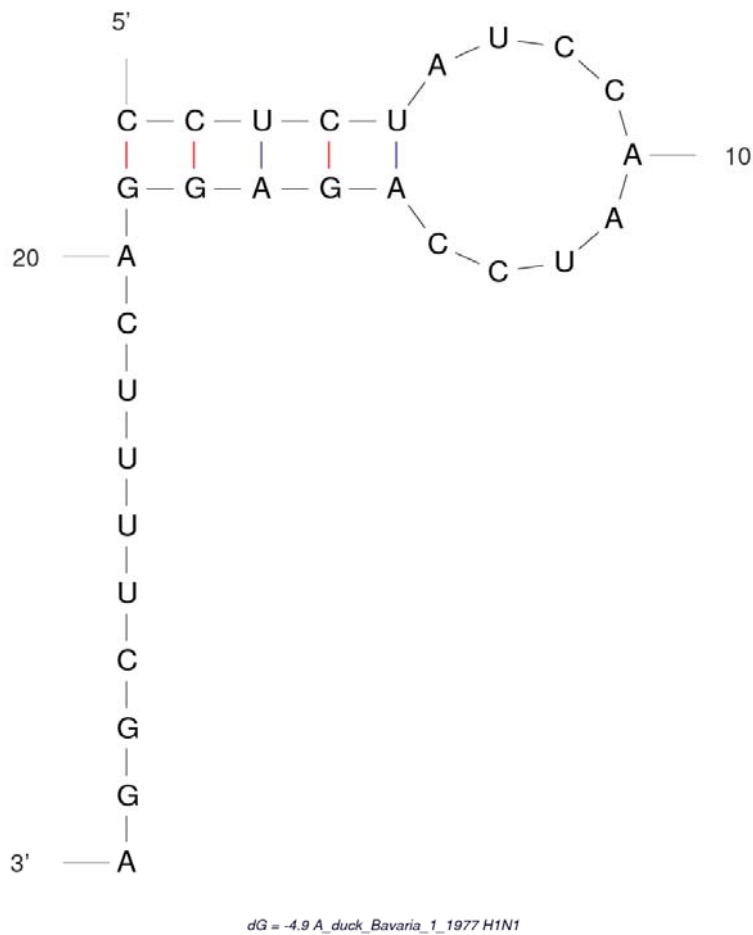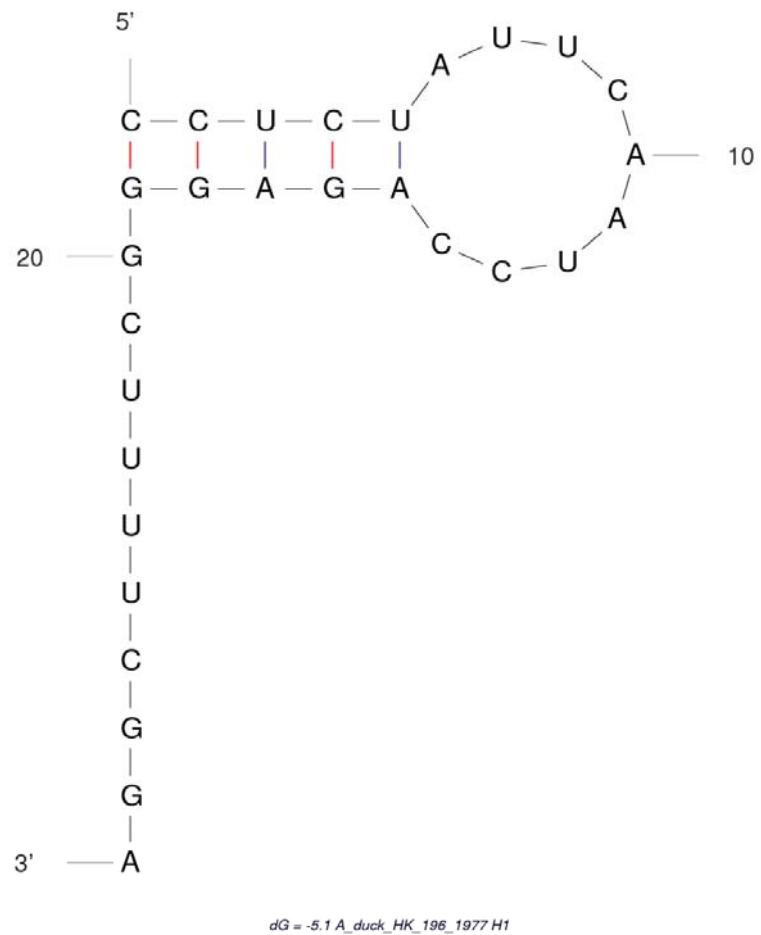

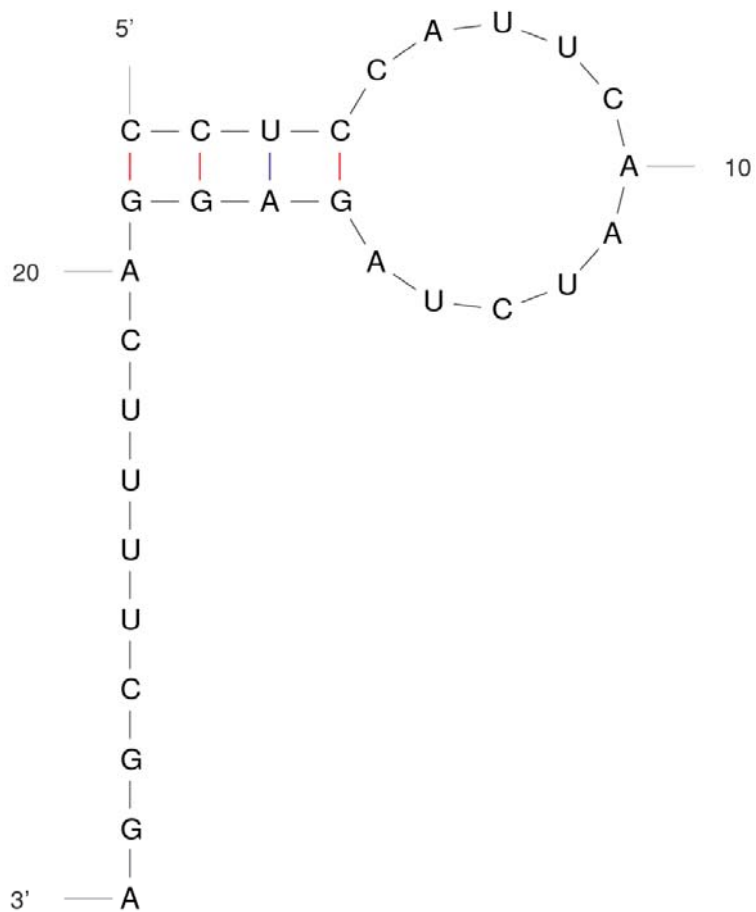

*dG = -3.3 A\_duck\_Miyagi\_66\_1977 H1N1*

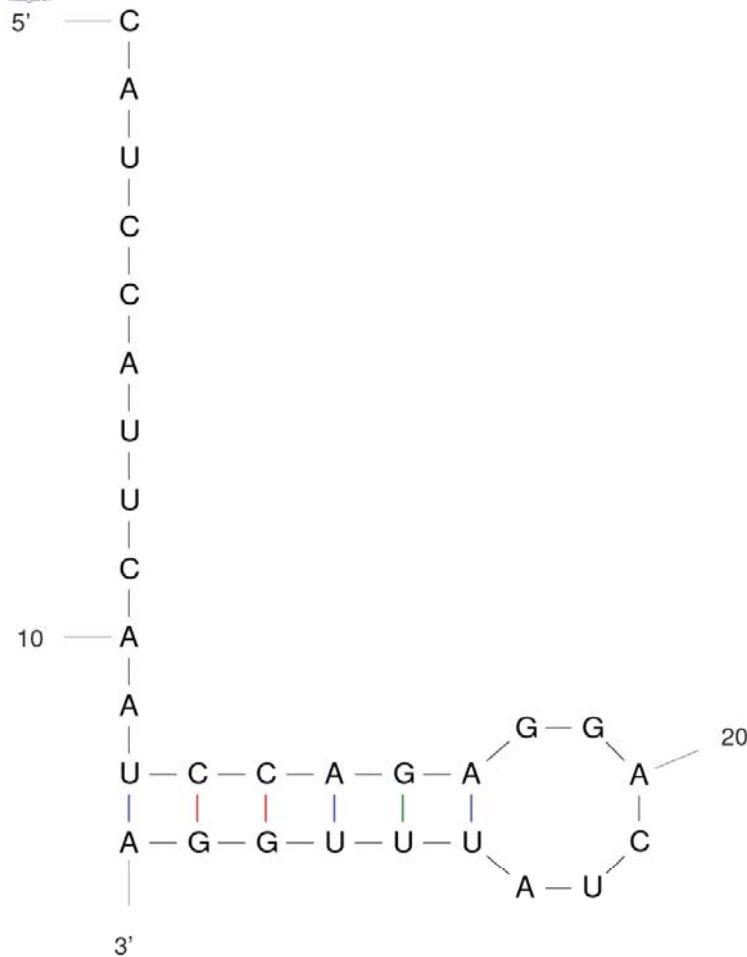

*dG = -5.2 A\_pintail\_duck\_ALB\_219\_1977 H1N1*

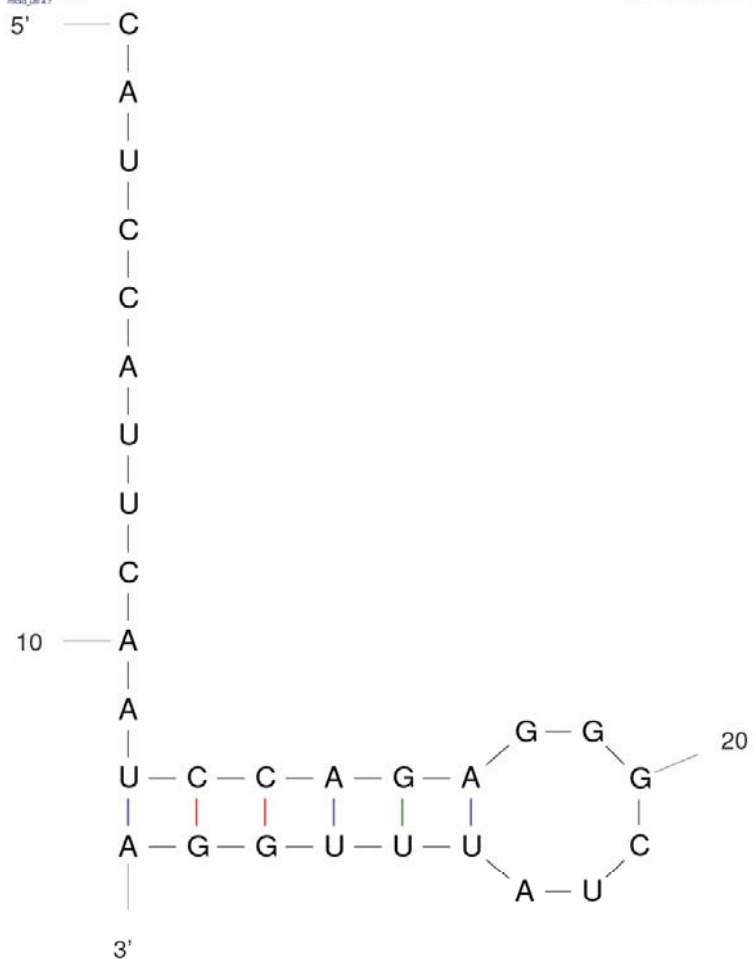

*dG = -5.2 A\_duck\_Minnesota\_1375\_1981 H1N1*

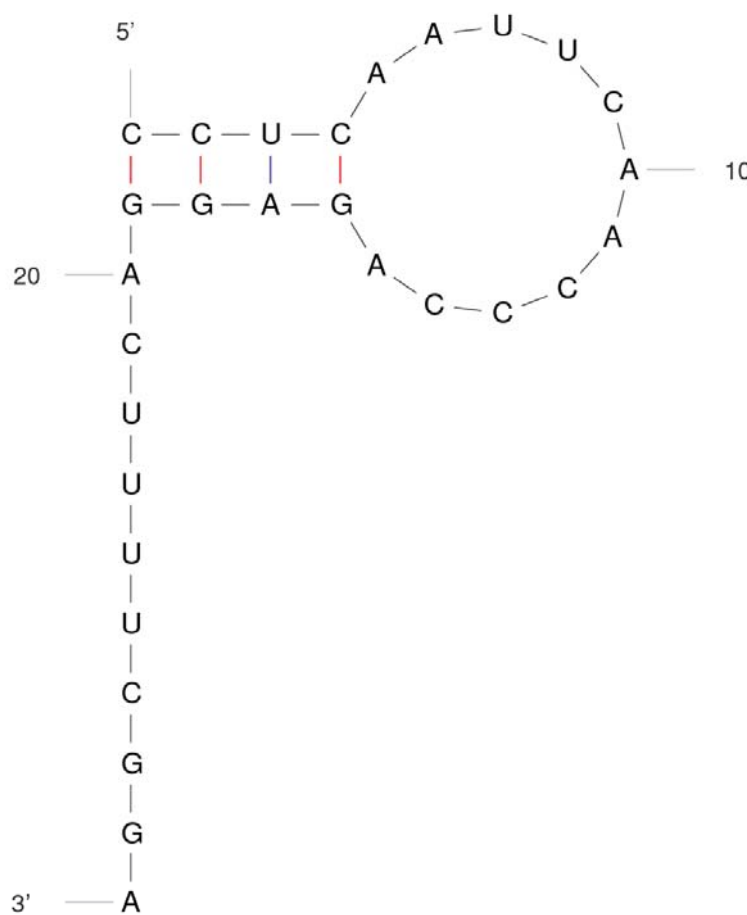

*dG = -3.8 A\_duck\_Victoria\_23\_1981 H1N1*

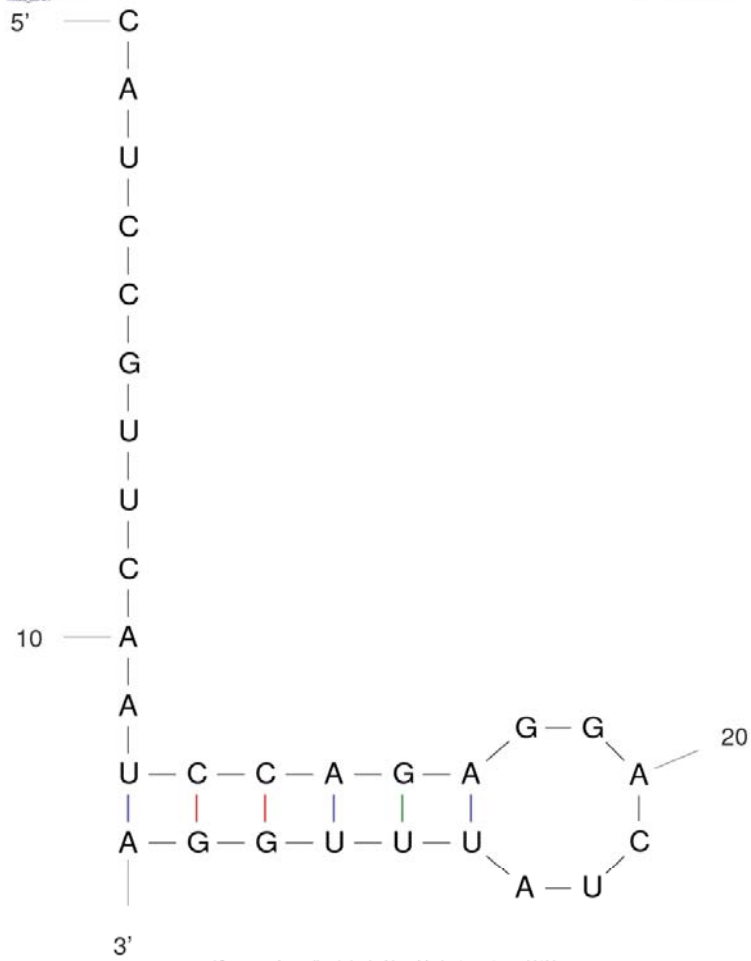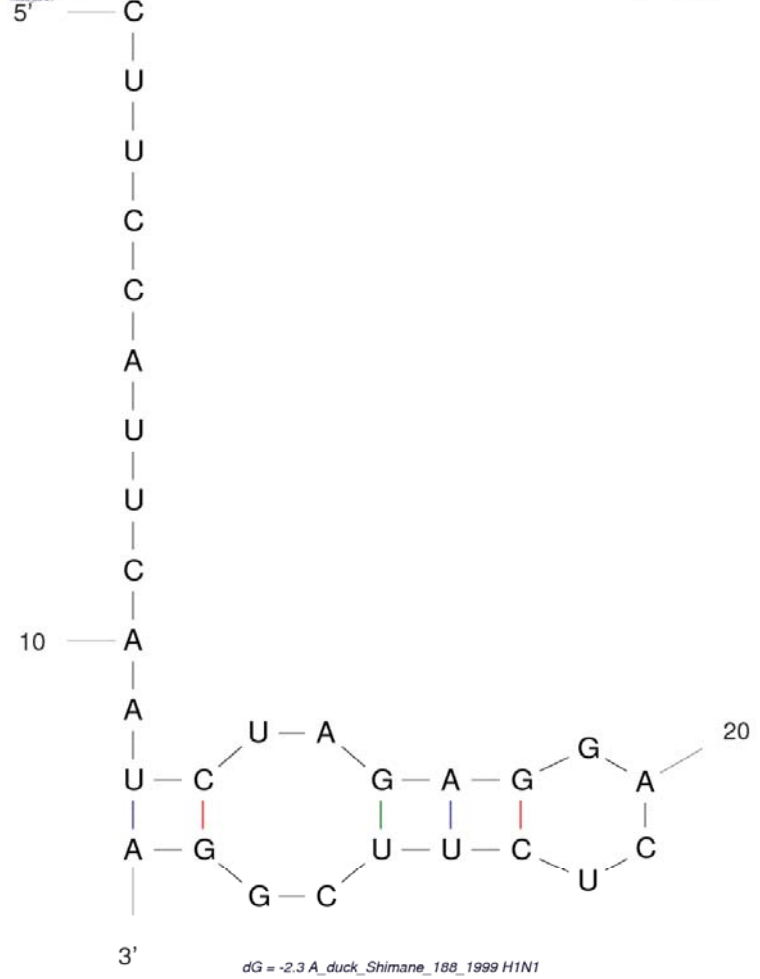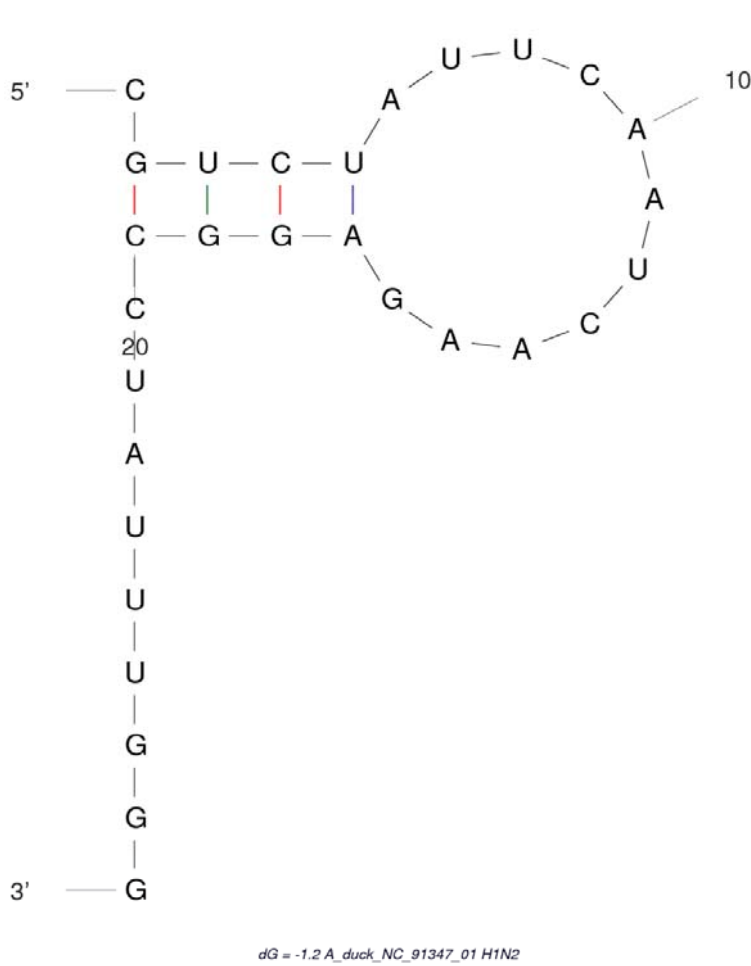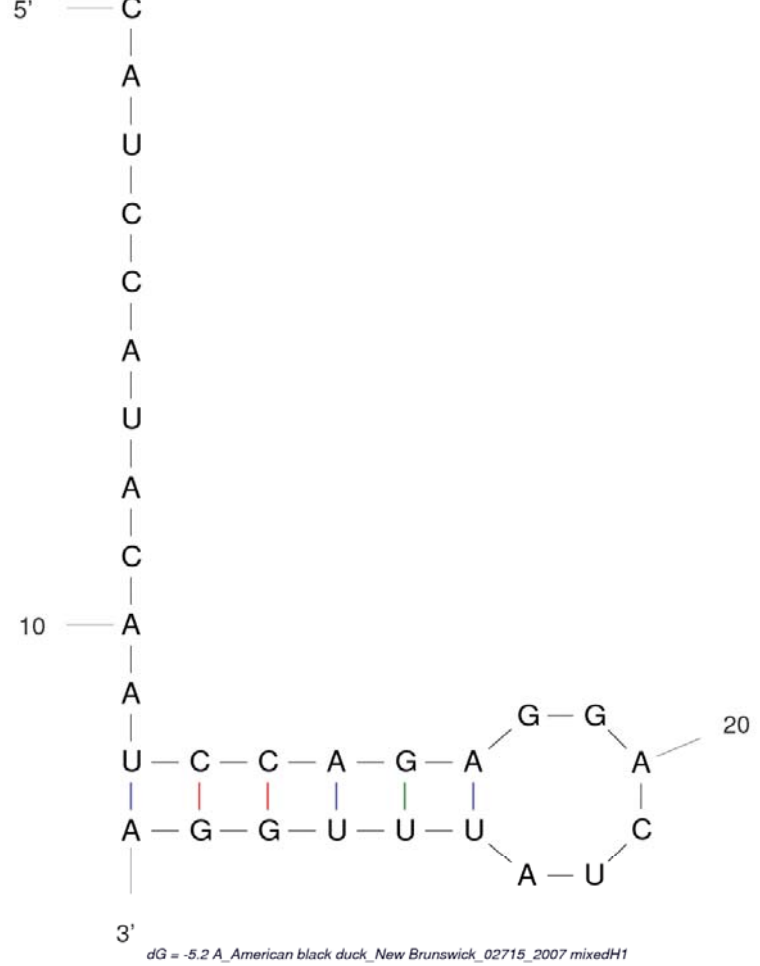

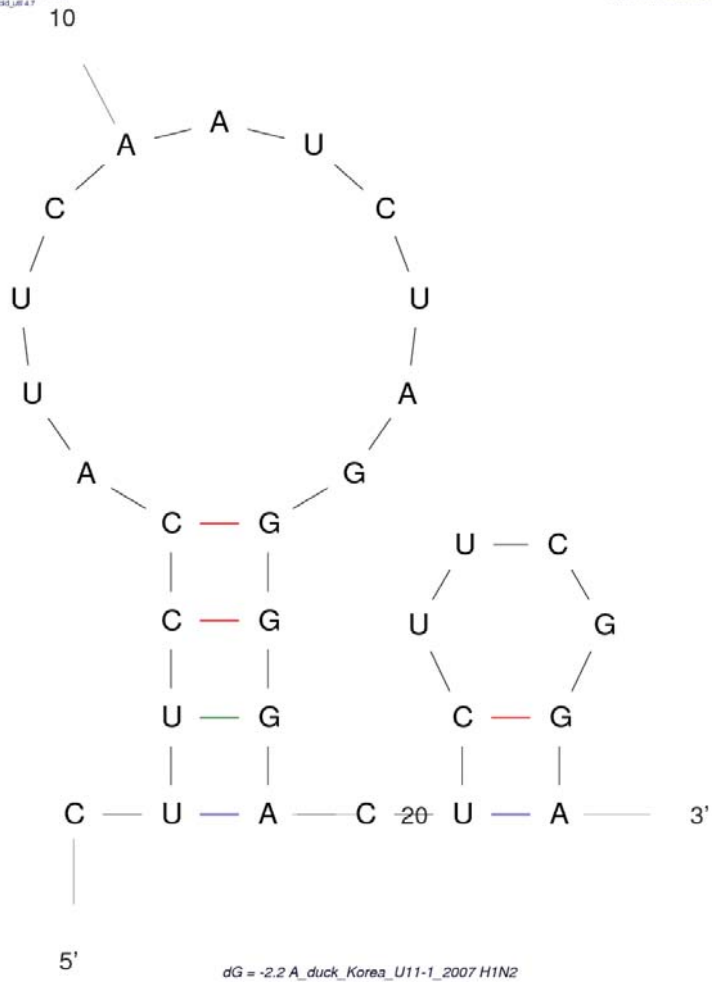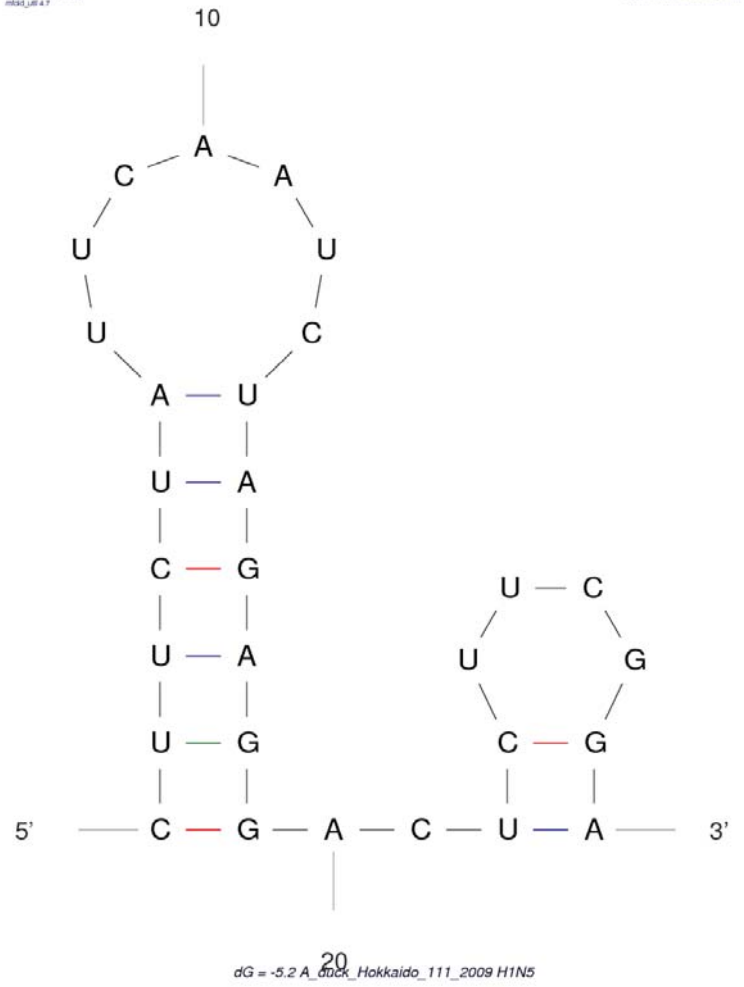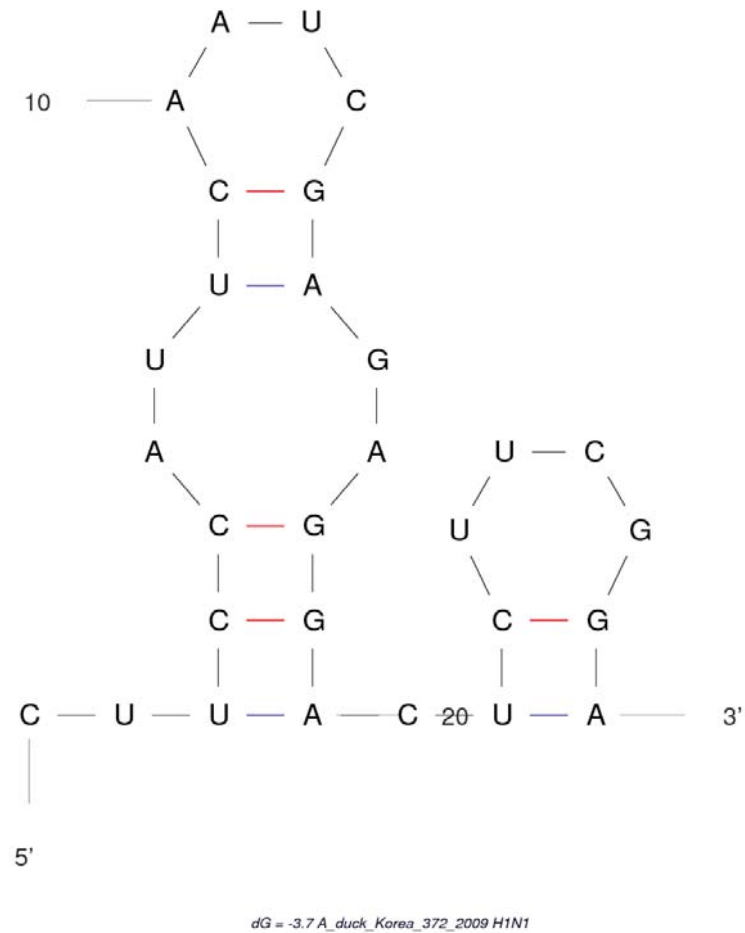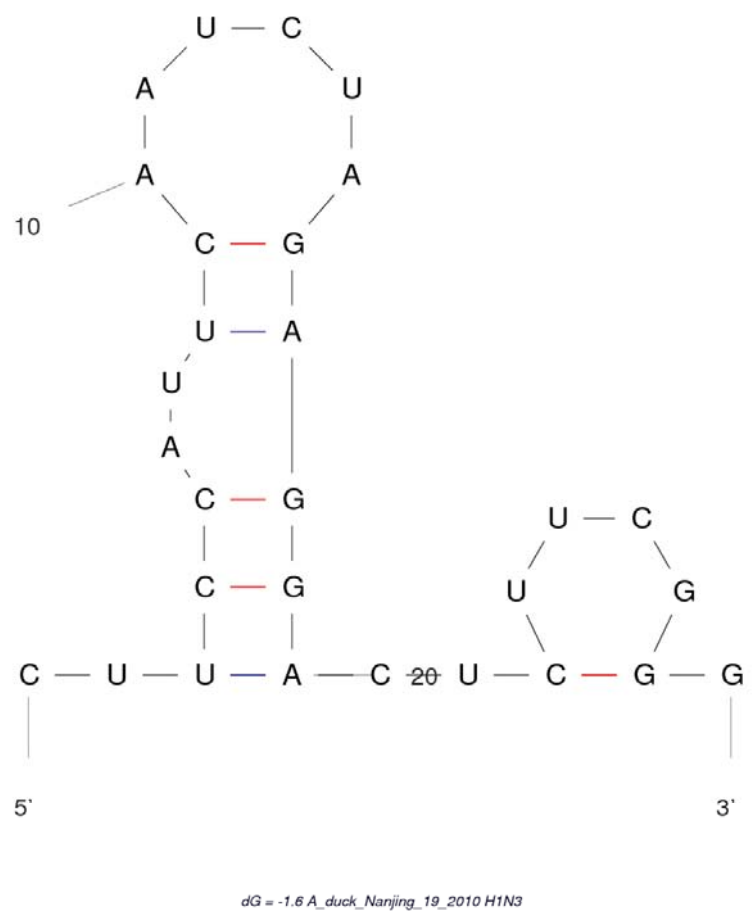

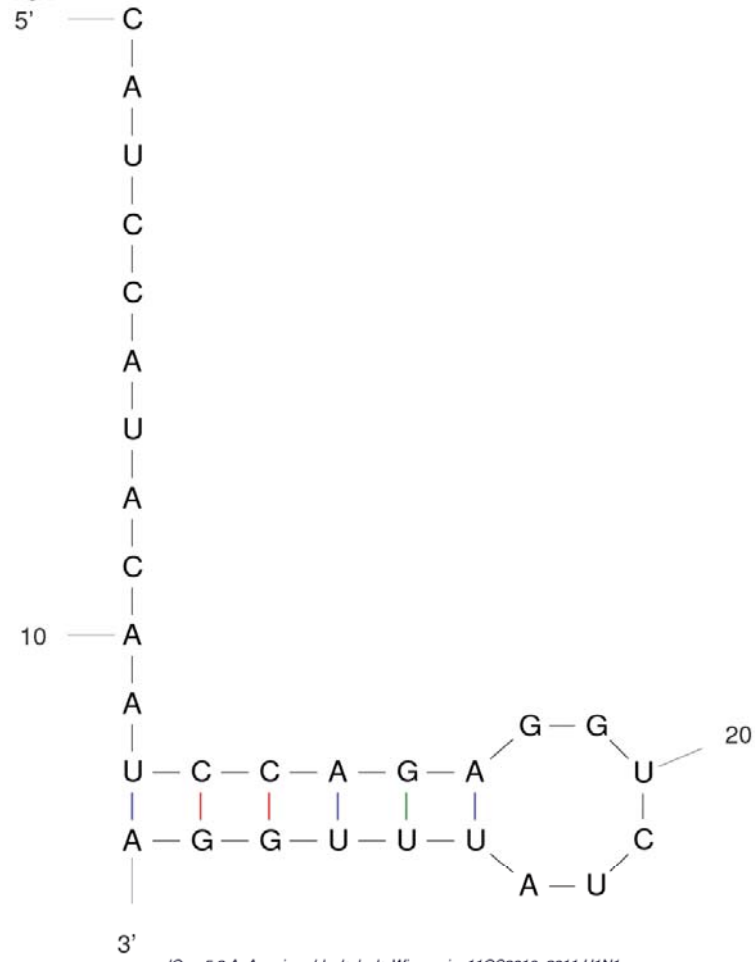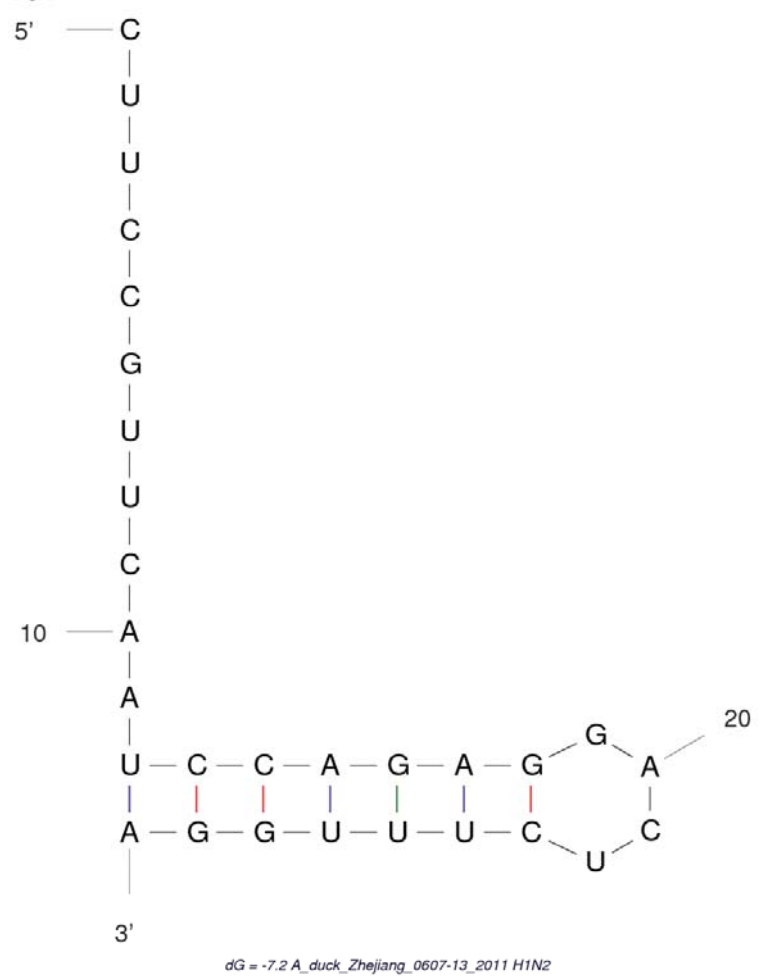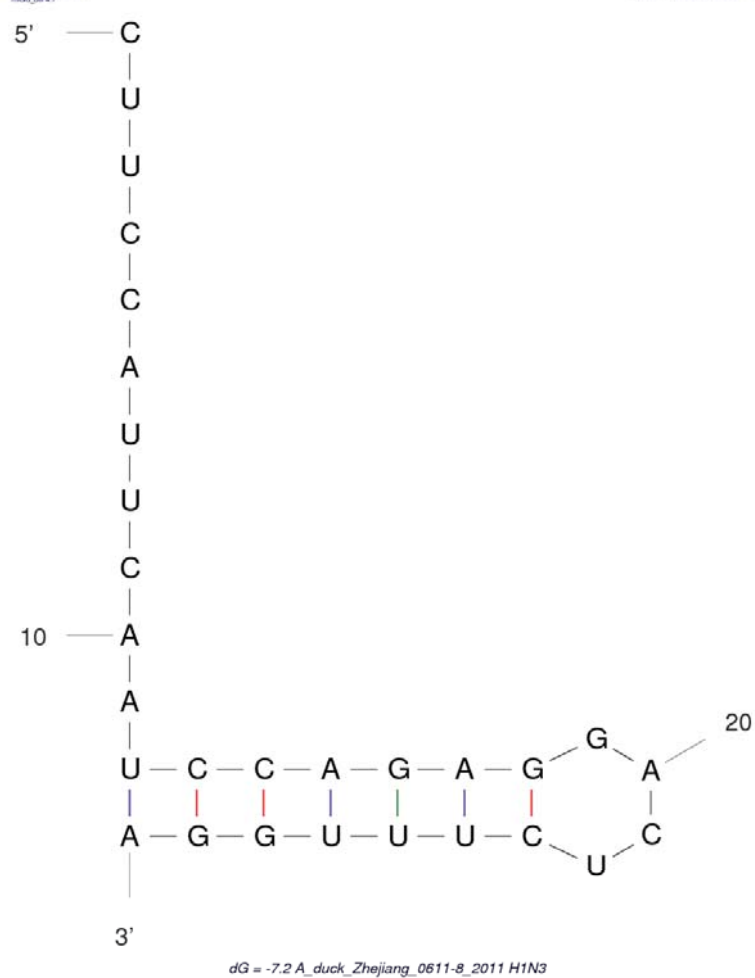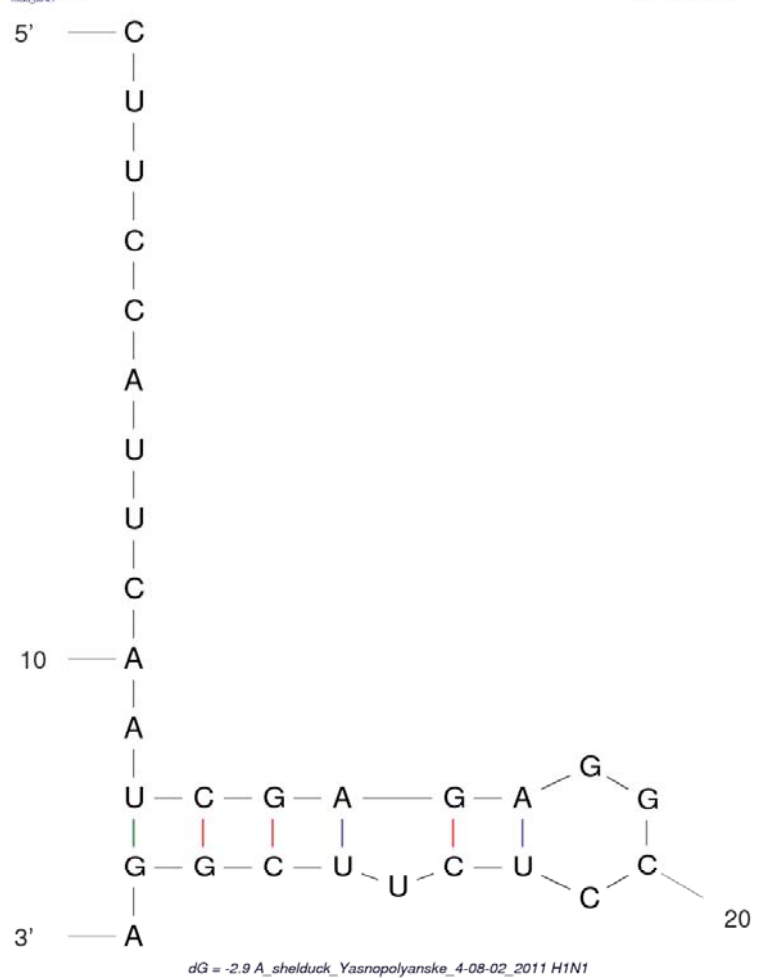

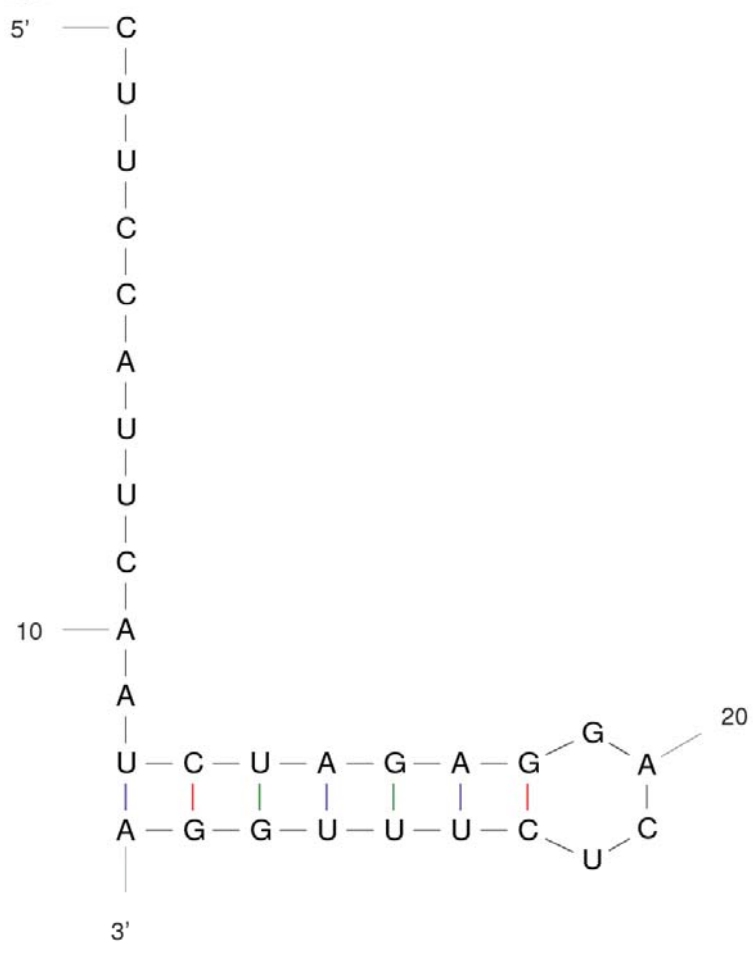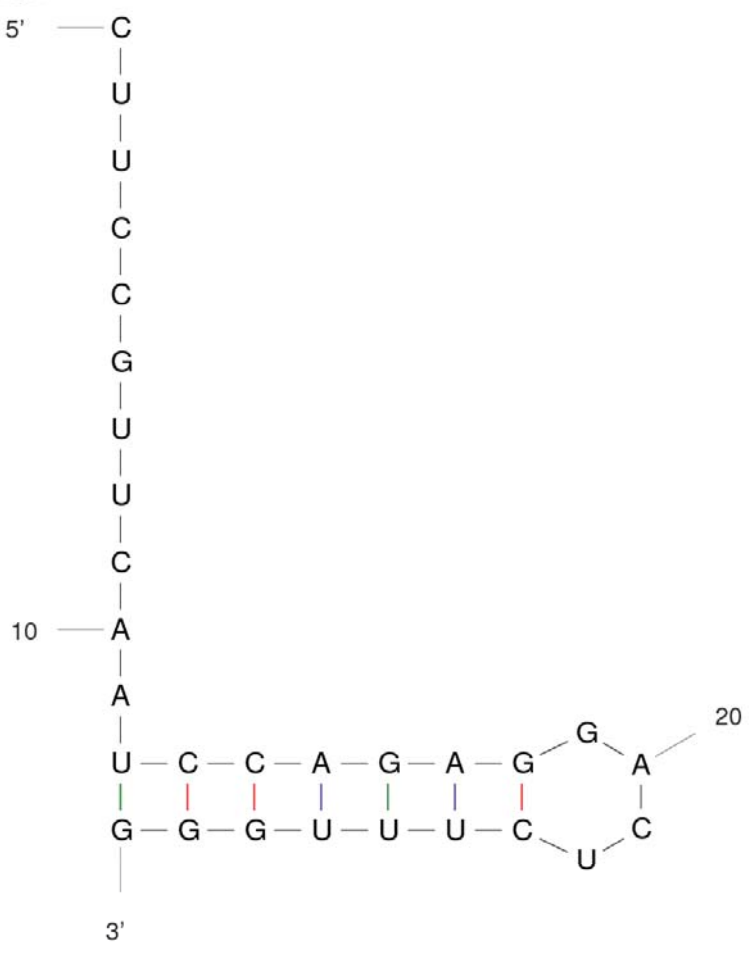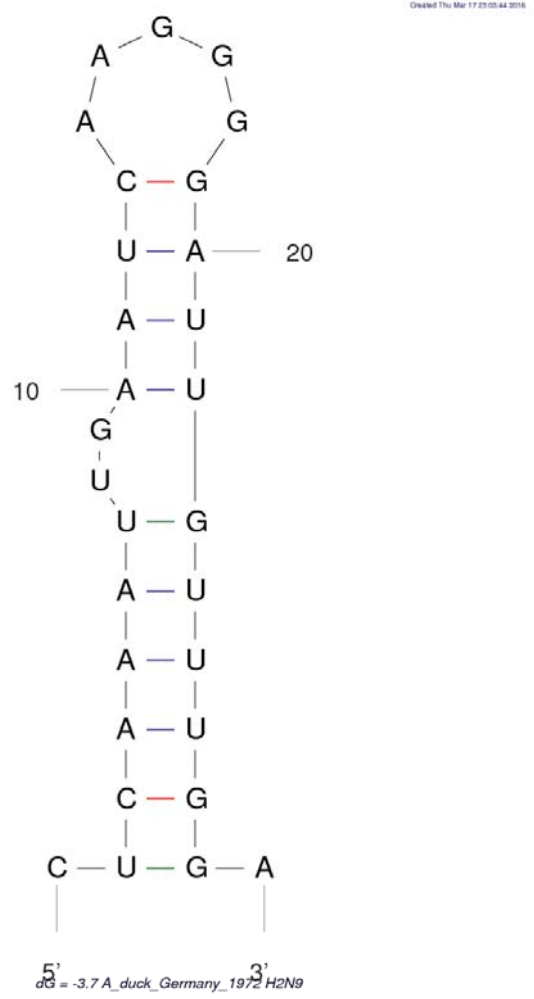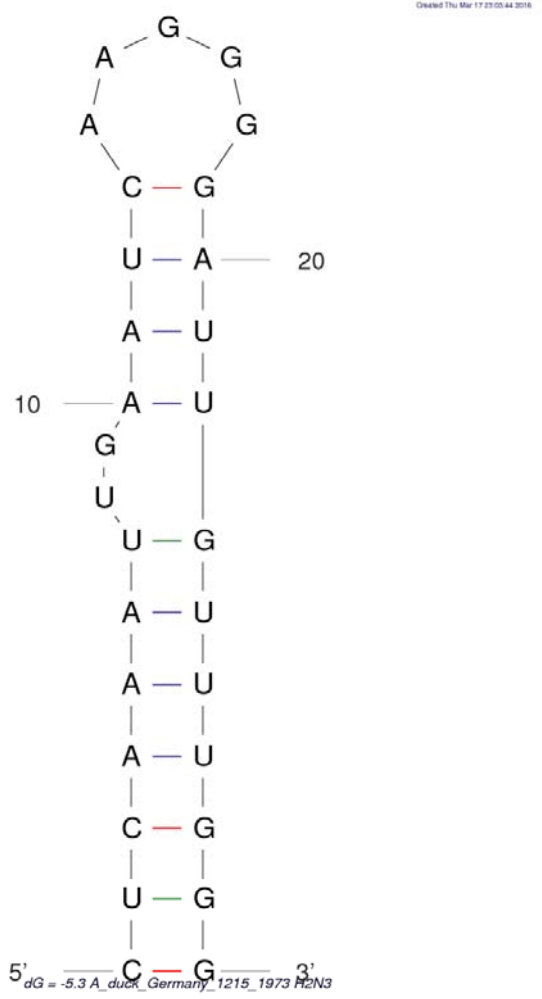

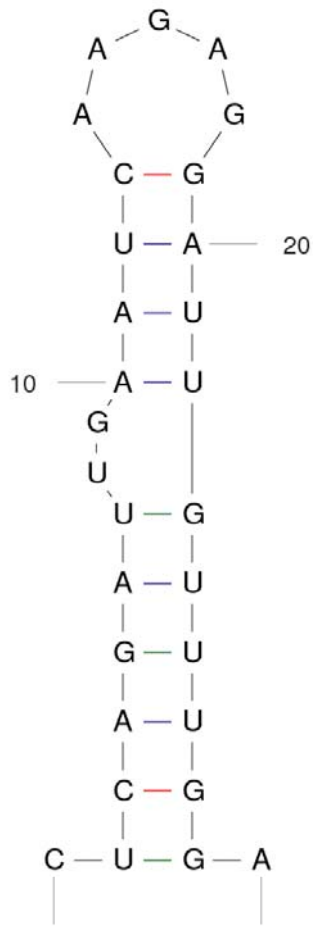

dG = -3.8 A\_black\_duck\_New\_Jersey\_1580\_1978 H2N3

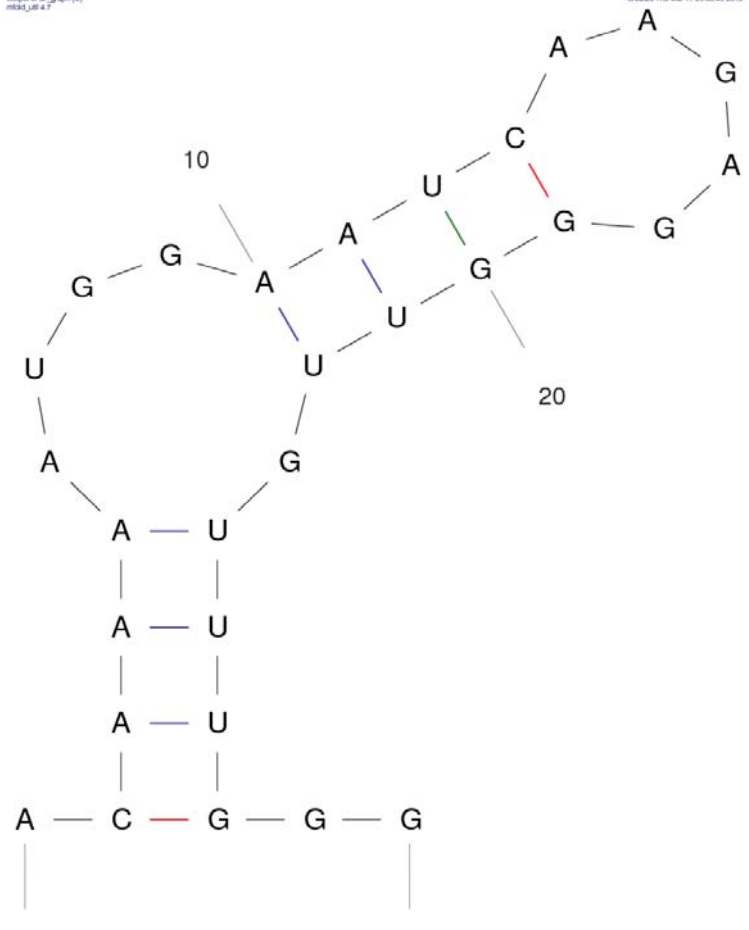

dG = -0.4 A\_duck\_Hong\_Kong\_273\_1978 H2N2

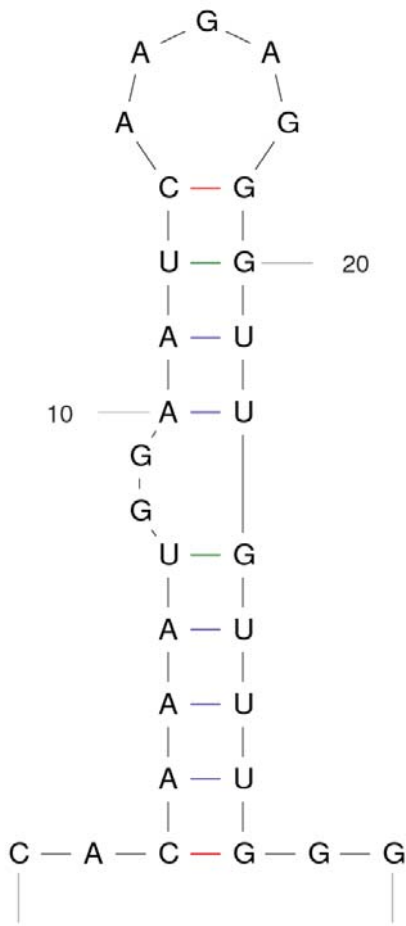

dG = -2.7 A\_duck\_Hong\_Kong\_273\_1978 H2N22

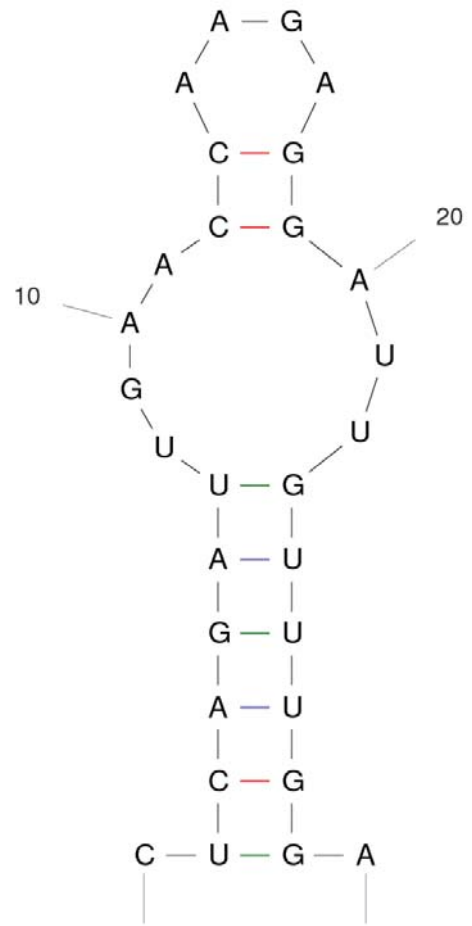

dG = -3.9 A\_pintail\_duck\_Alberta\_211\_1980 H2N3

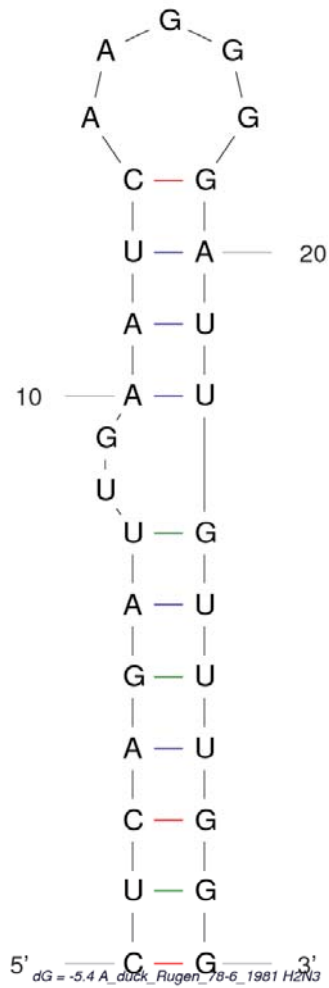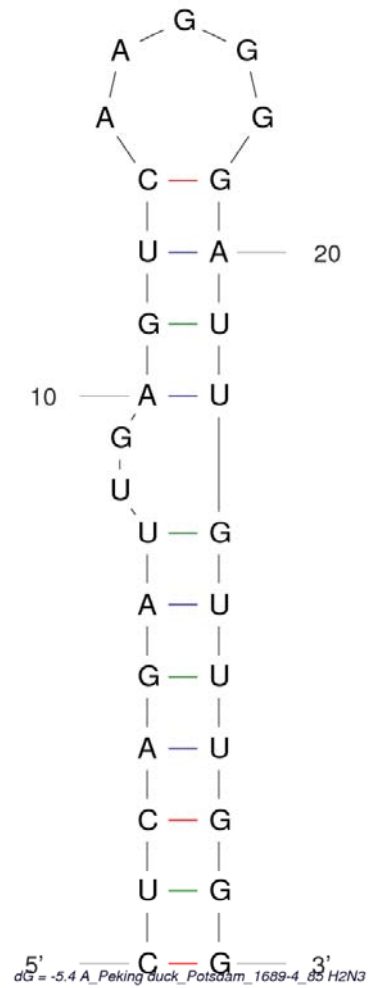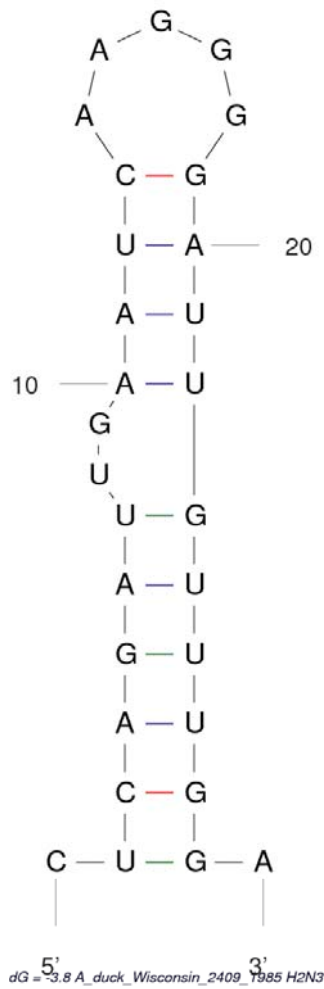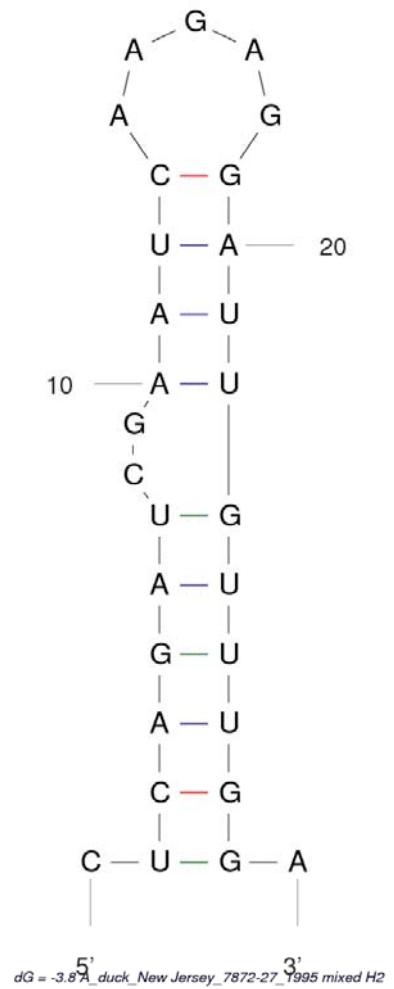



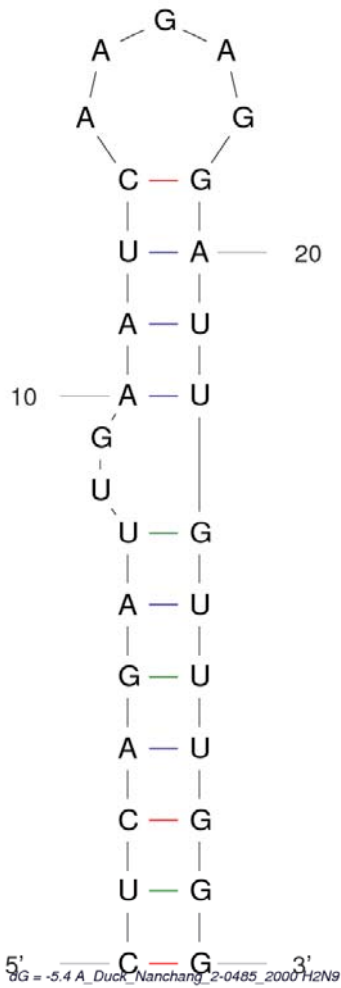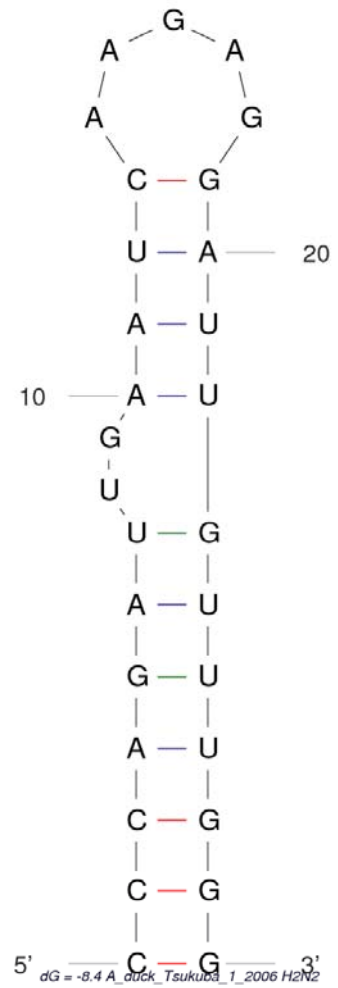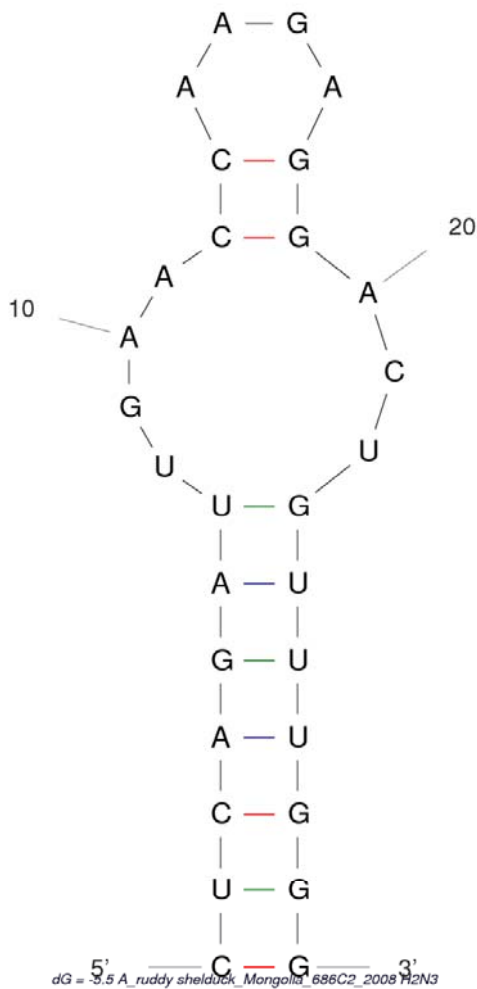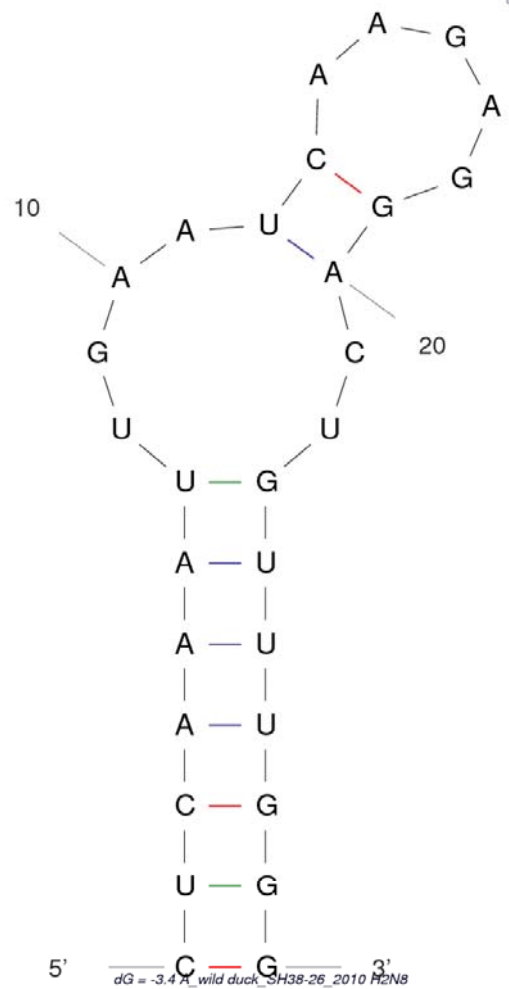

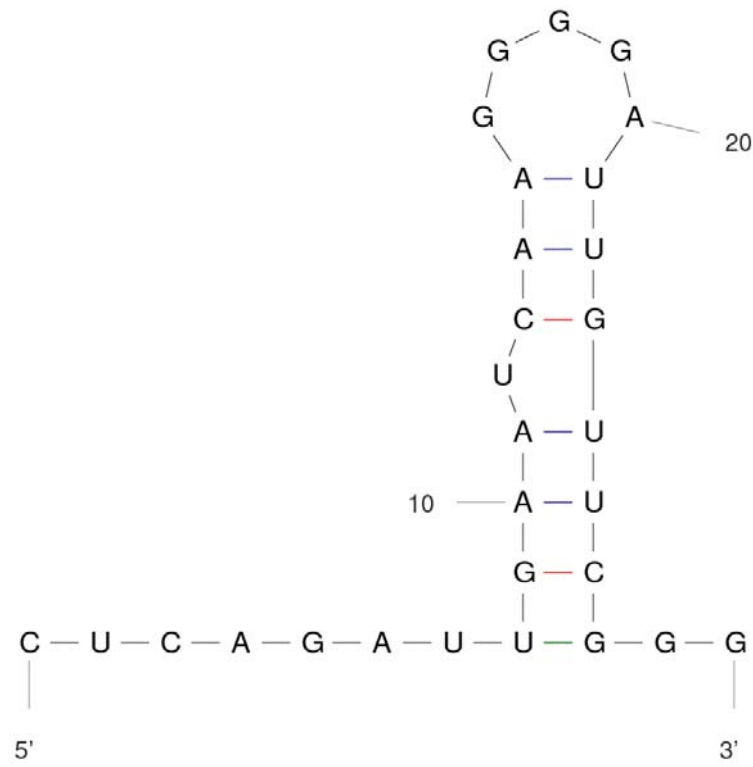

dG = -1.9 A\_duck\_Interior Alaska\_11PG00451\_2011 H2N3

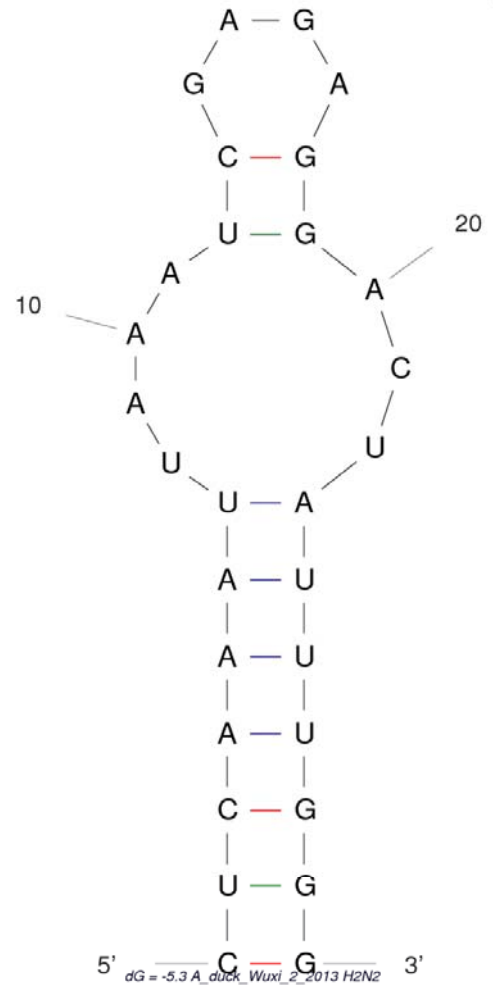

dG = -5.3 A\_duck\_Wuxi\_2\_2013 H2N2

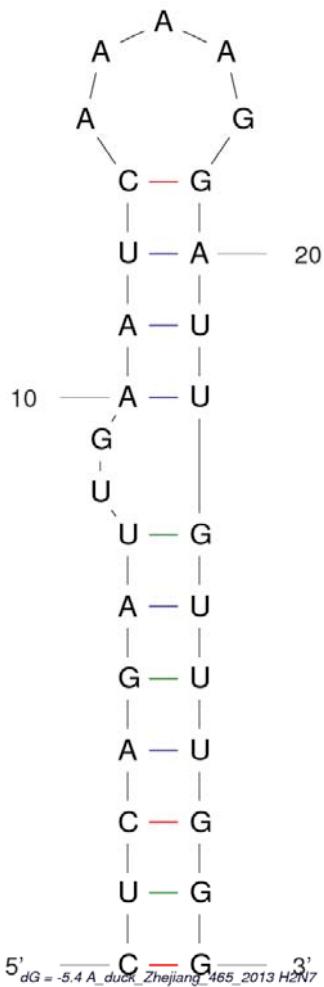

dG = -5.4 A\_duck\_Zhejiang\_465\_2013 H2N7

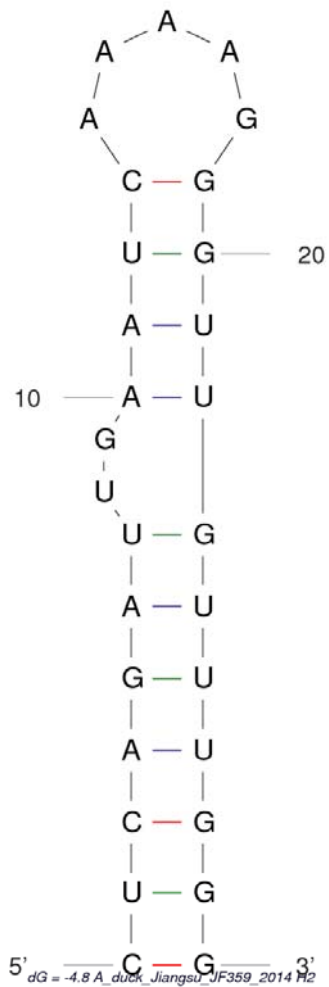

dG = -4.8 A\_duck\_Jiangsu\_JF359\_2014 H2

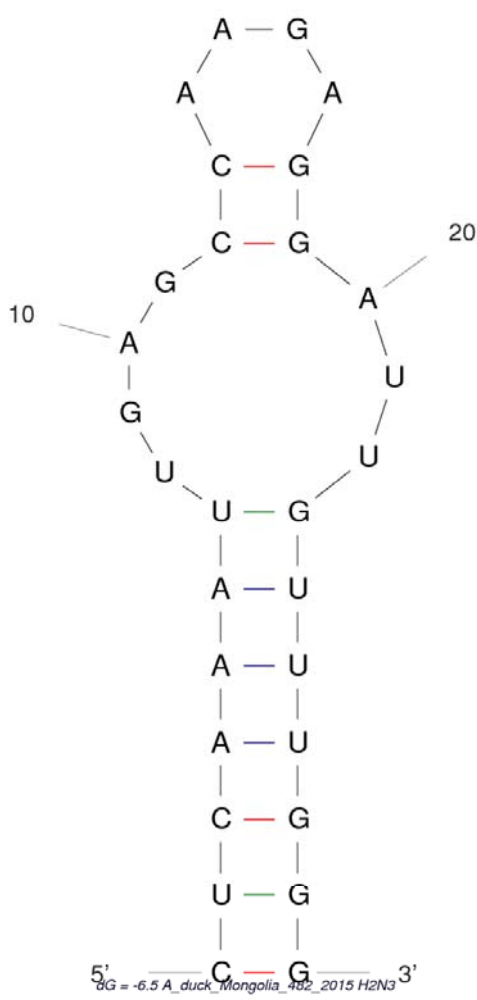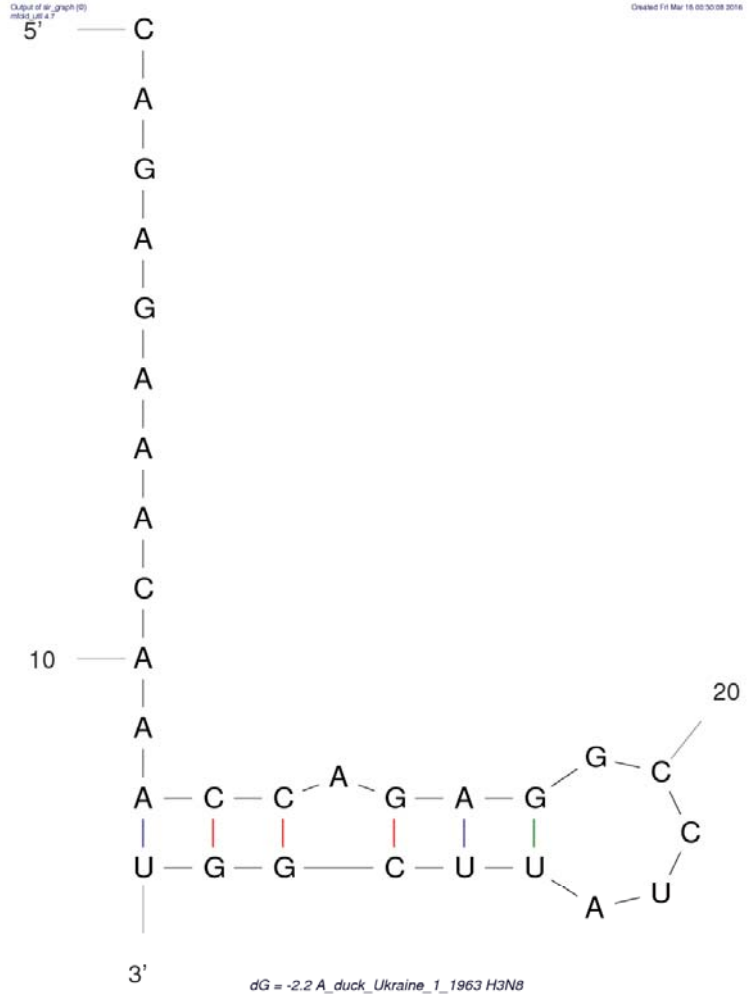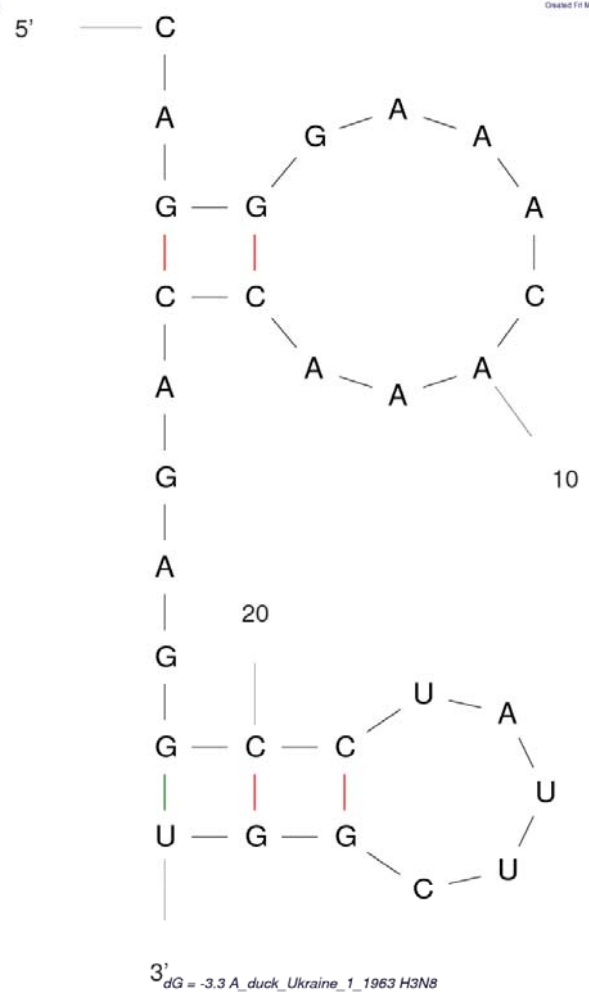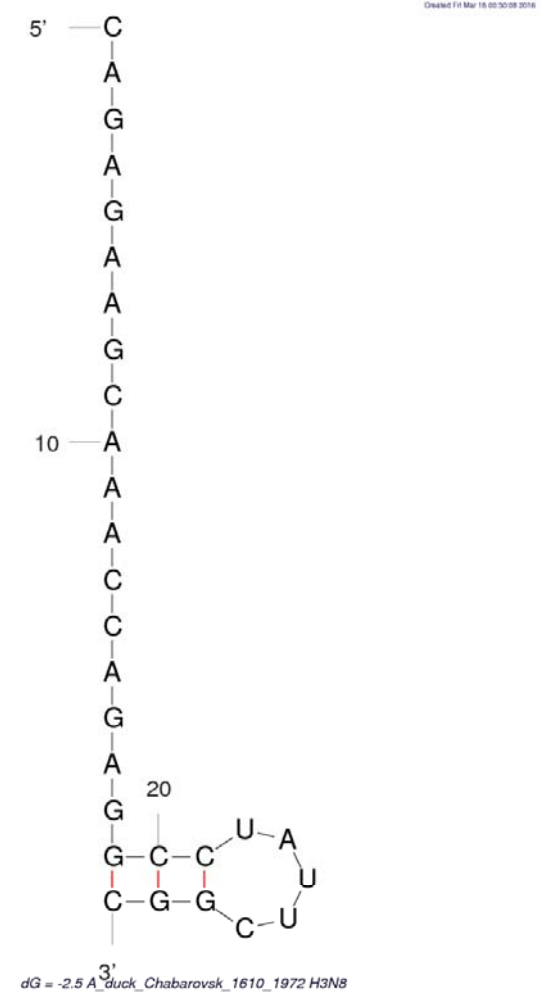

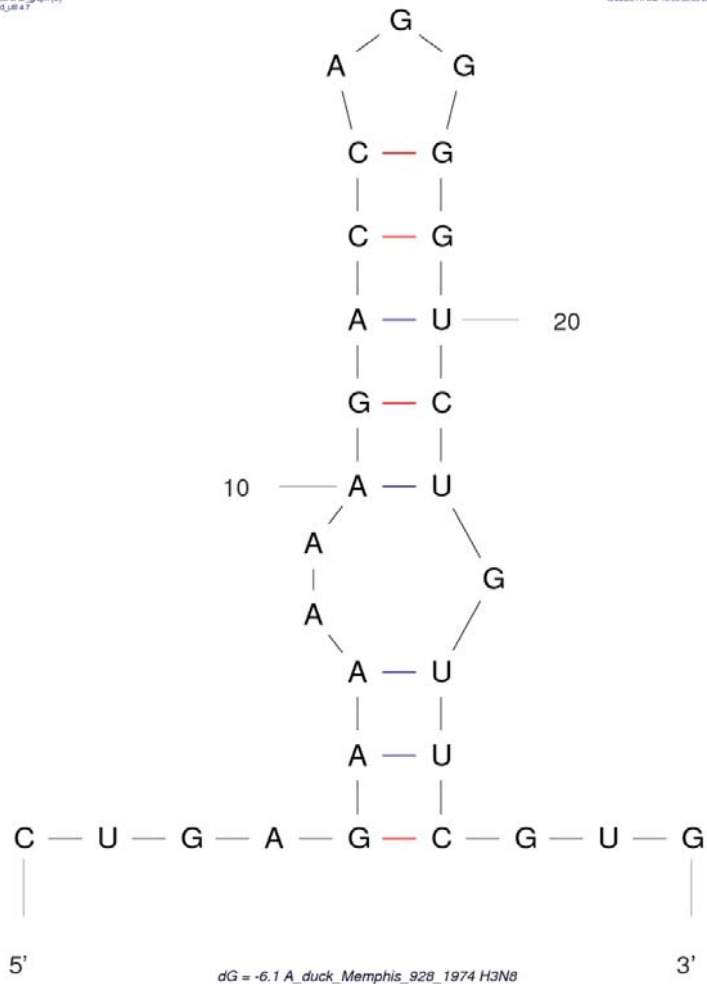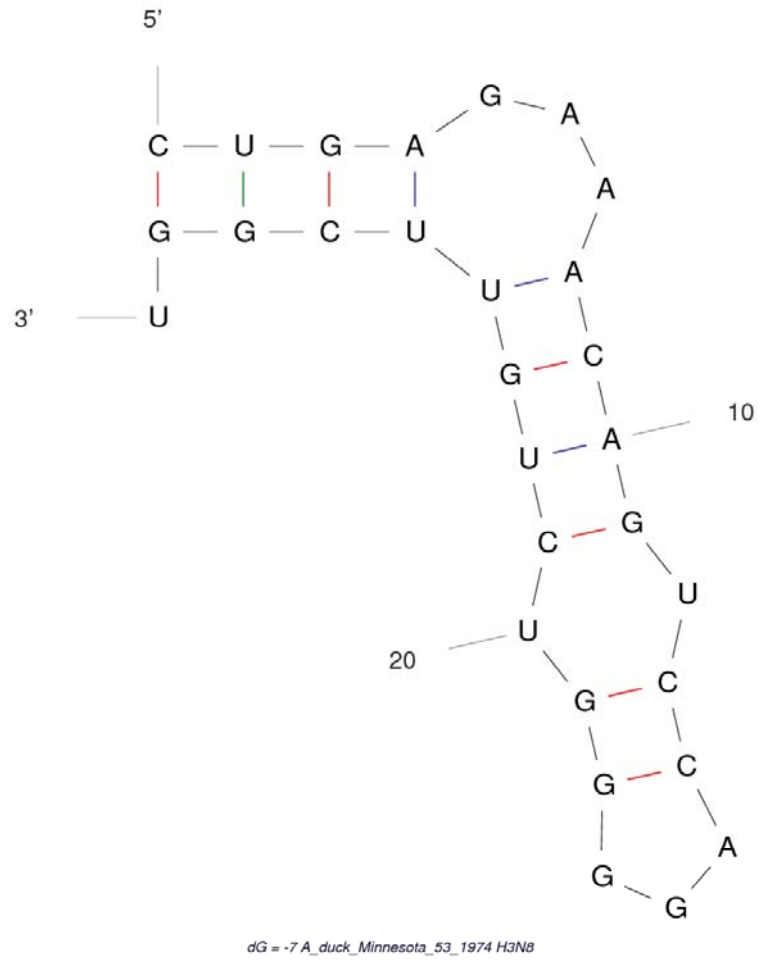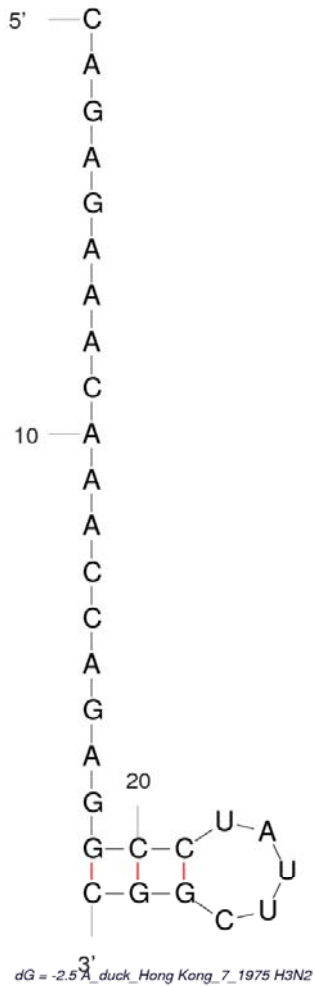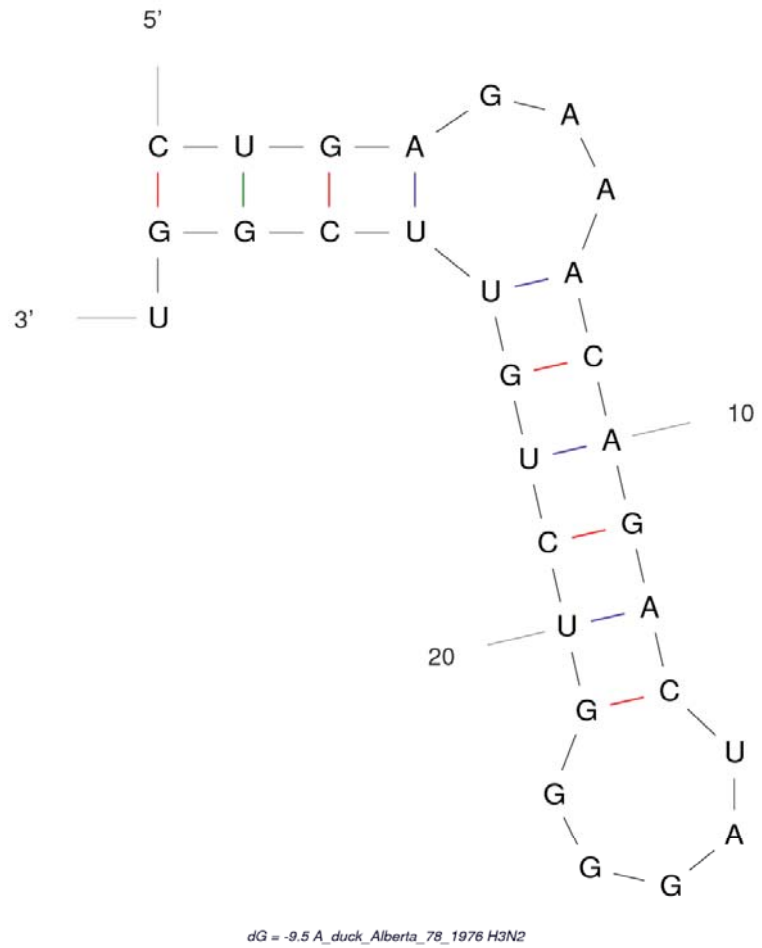

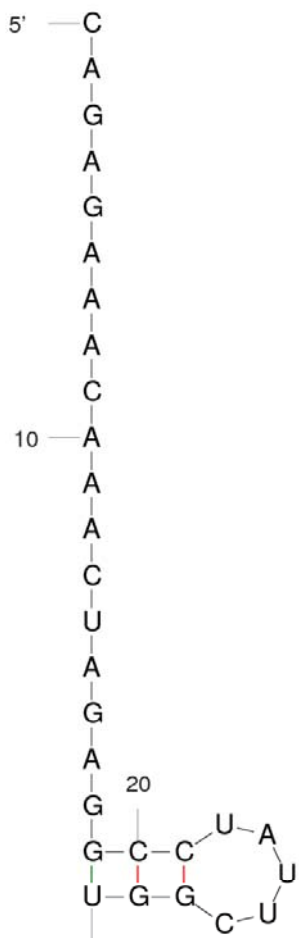

dG = -1.5 A\_ duck\_Hong Kong\_22A\_1976 H3N3

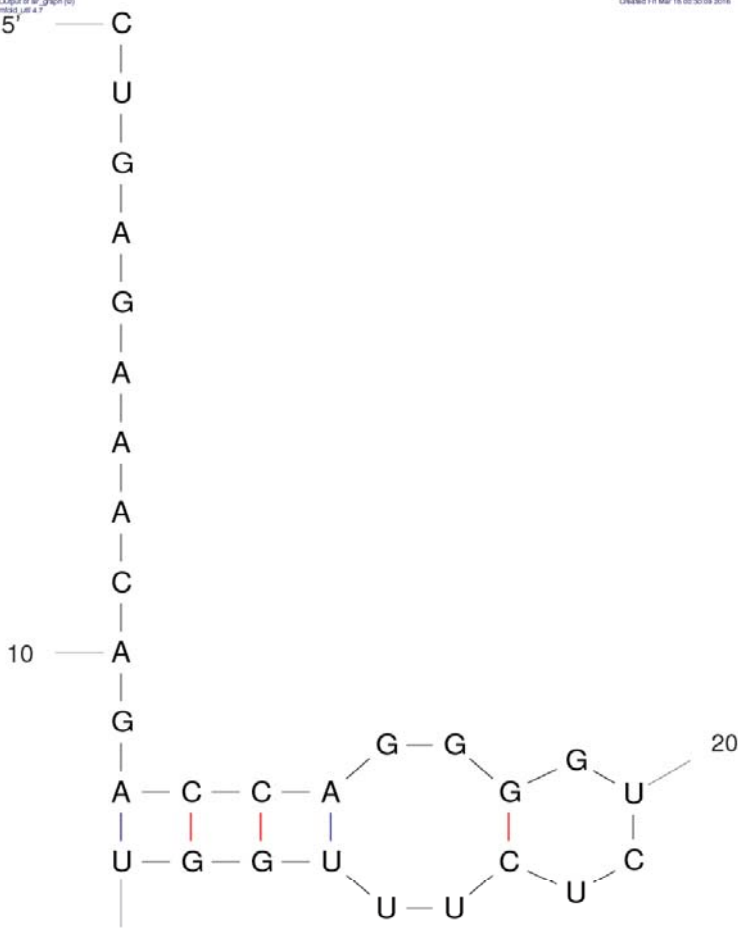

dG = -5.2 A\_ duck\_Minnesota\_34\_1976 H3N8

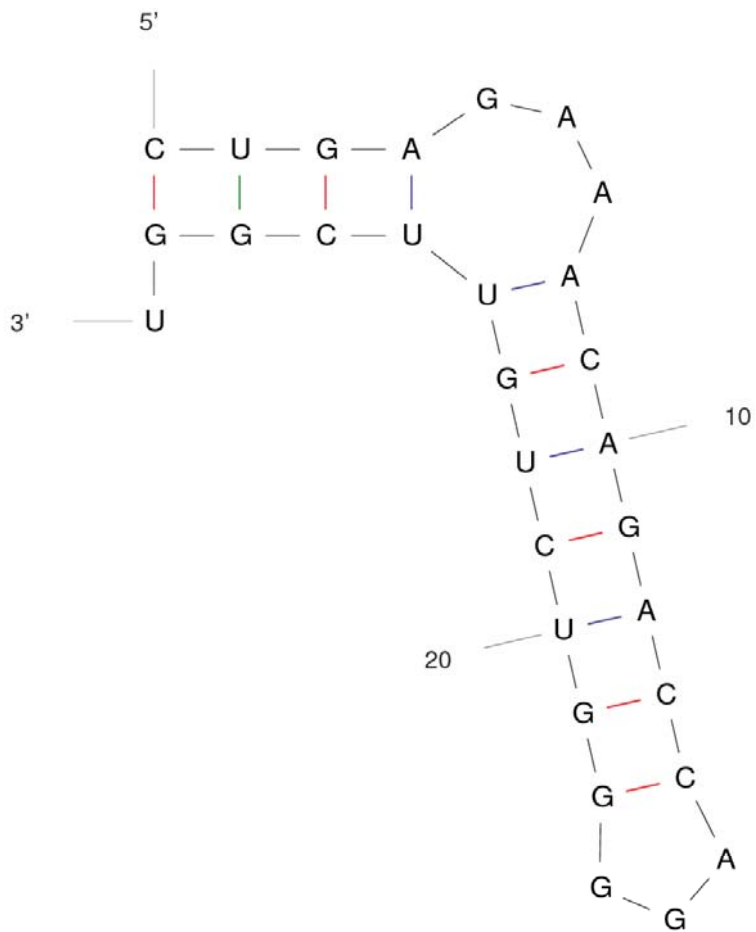

dG = -10.9 A\_mallard duck\_ALB\_31\_1976 H3N8

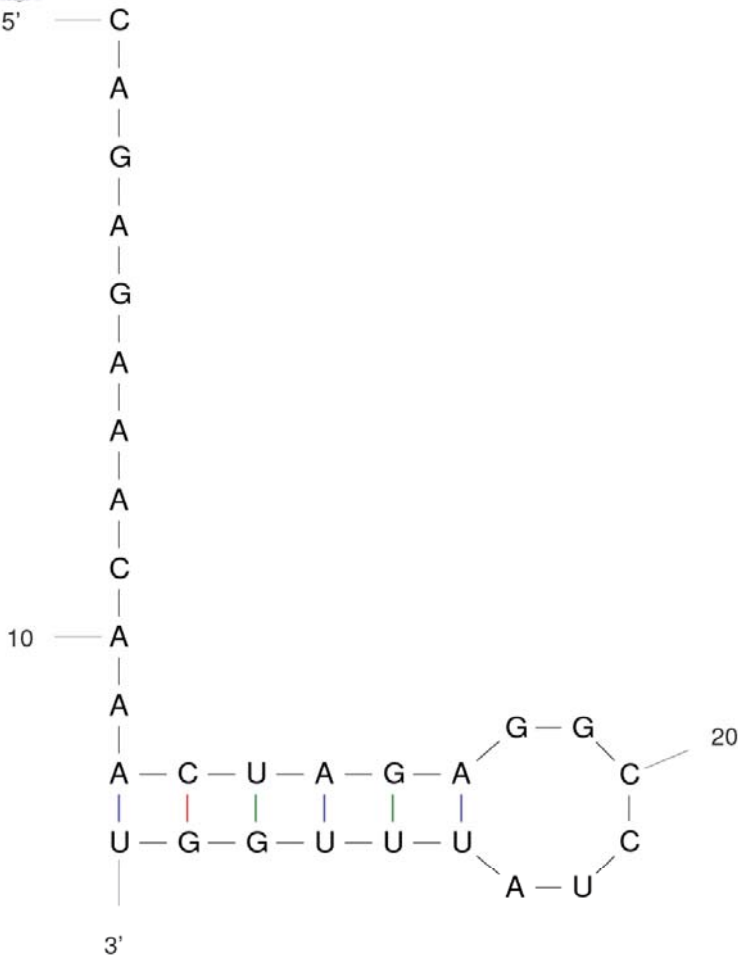

dG = -2.7 A\_ duck\_Hokkaido\_5\_1977 H3N2

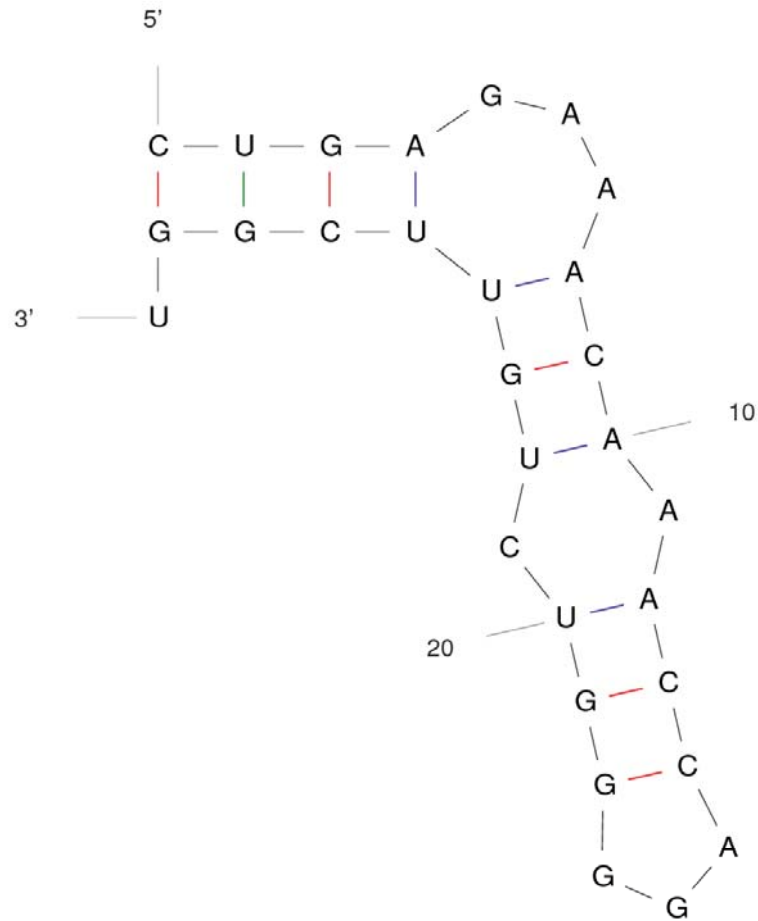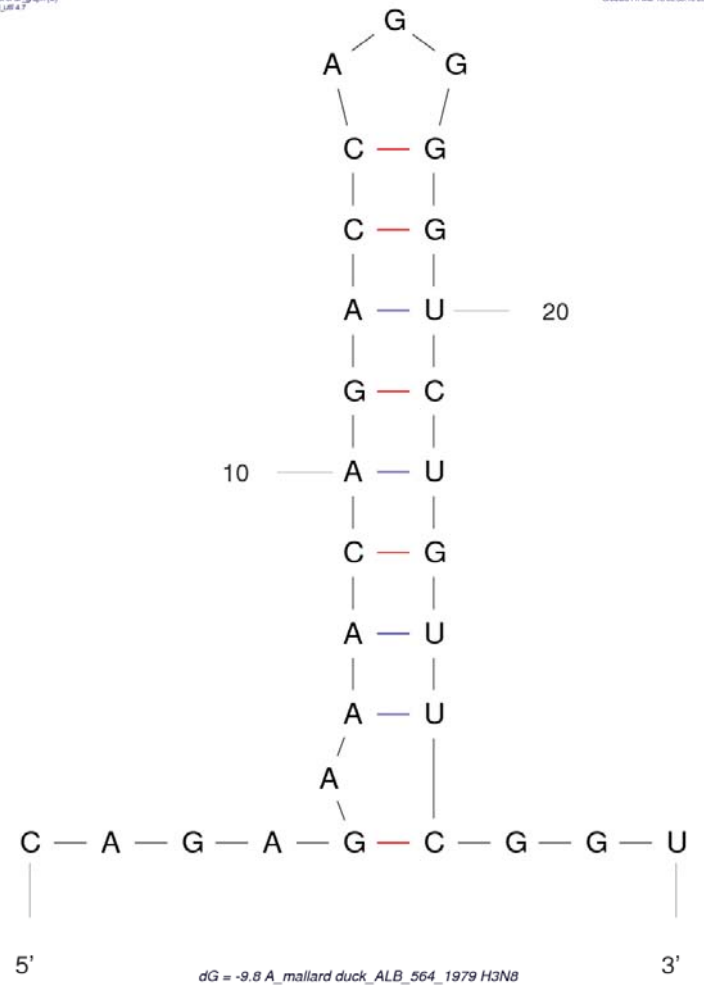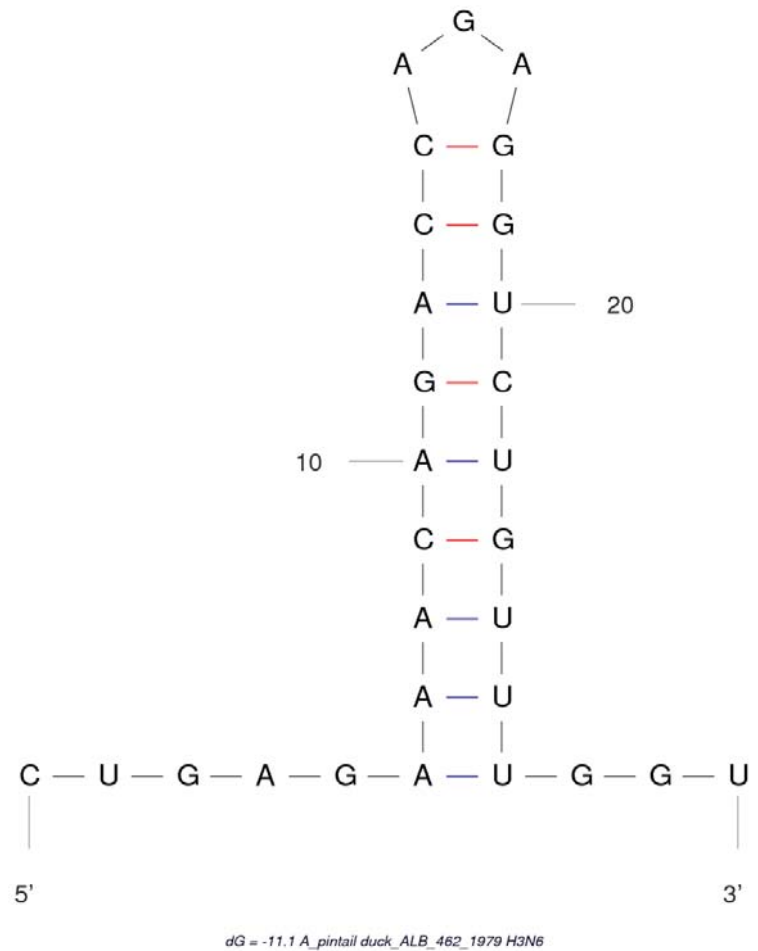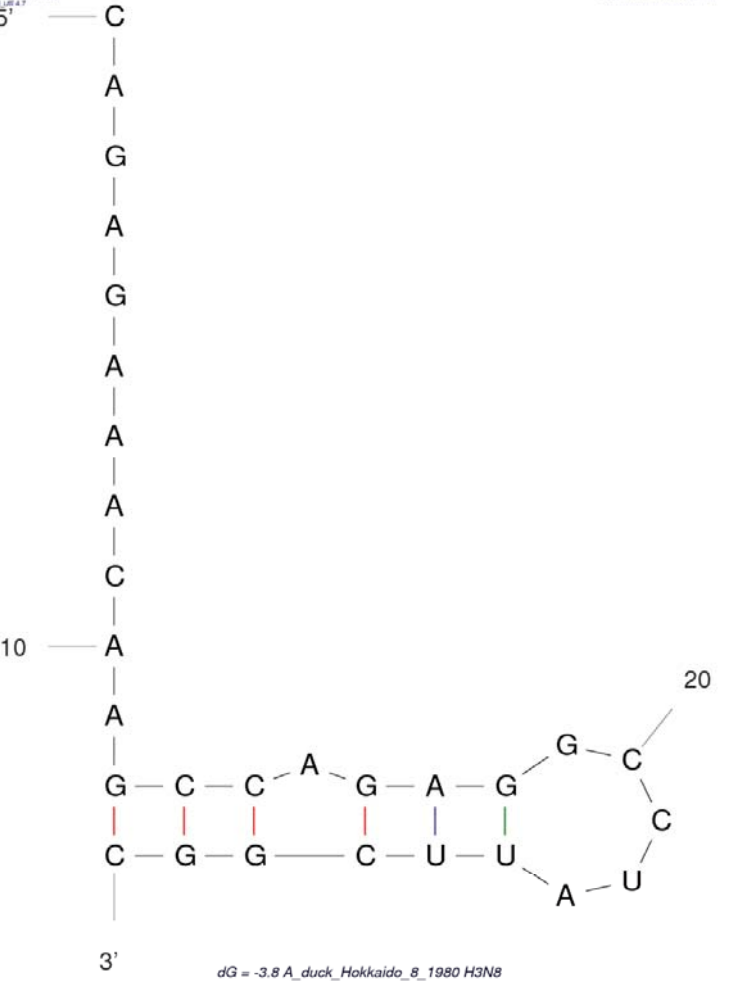

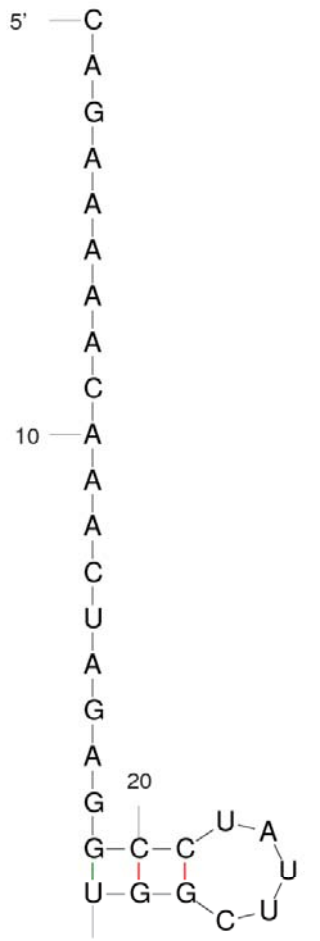

dG = -1.5 A\_duck\_Hong Kong\_836\_1980 H3N1

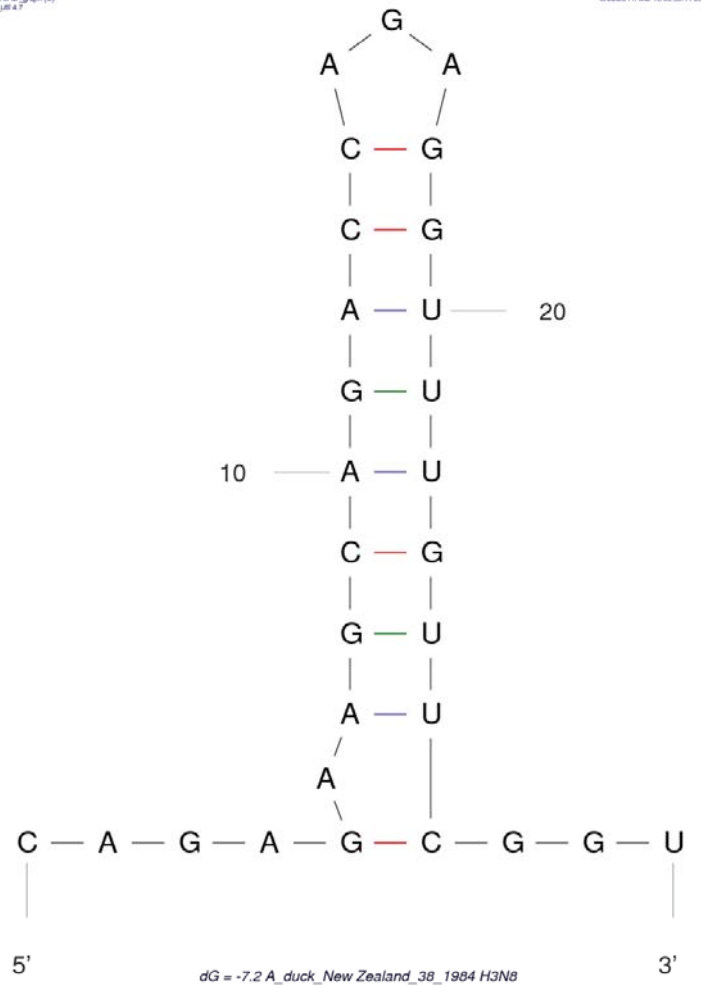

dG = -7.2 A\_duck\_New Zealand\_38\_1984 H3N8

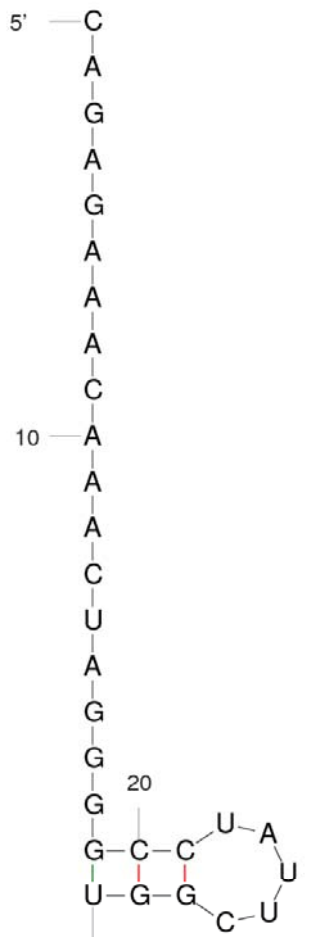

dG = -1.5 A\_duck\_Hokkaido\_10\_1985 H3N8

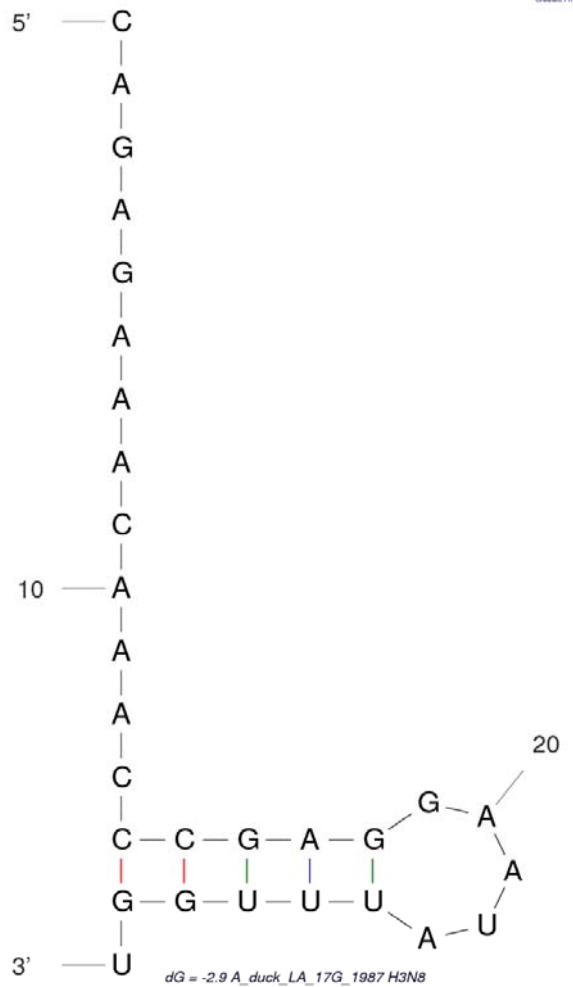

dG = -2.9 A\_duck\_LA\_17G\_1987 H3N8

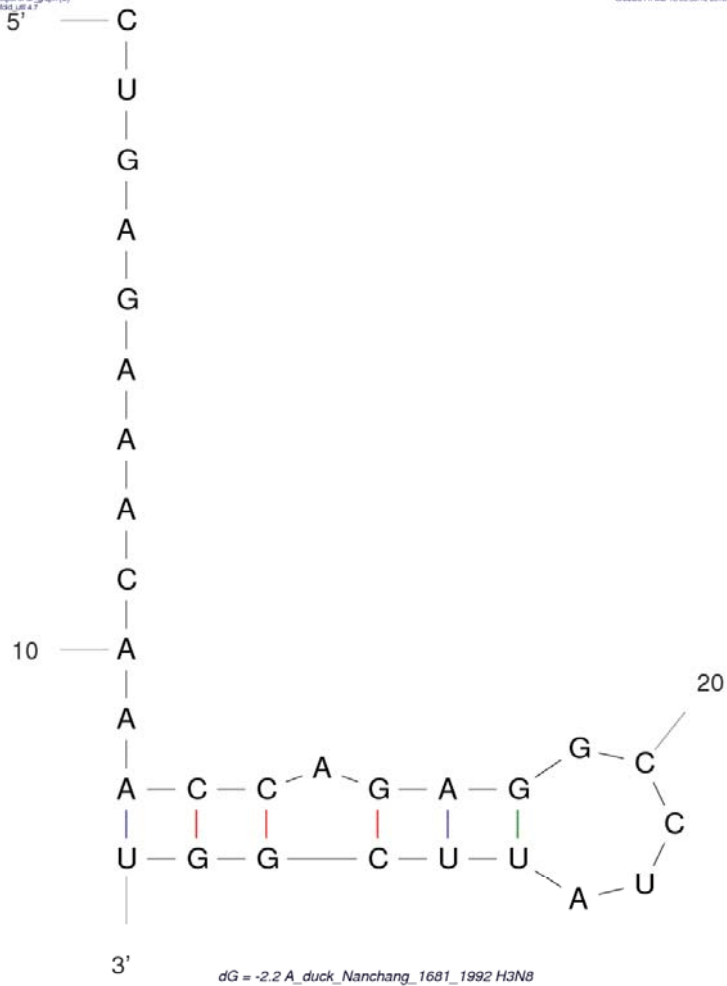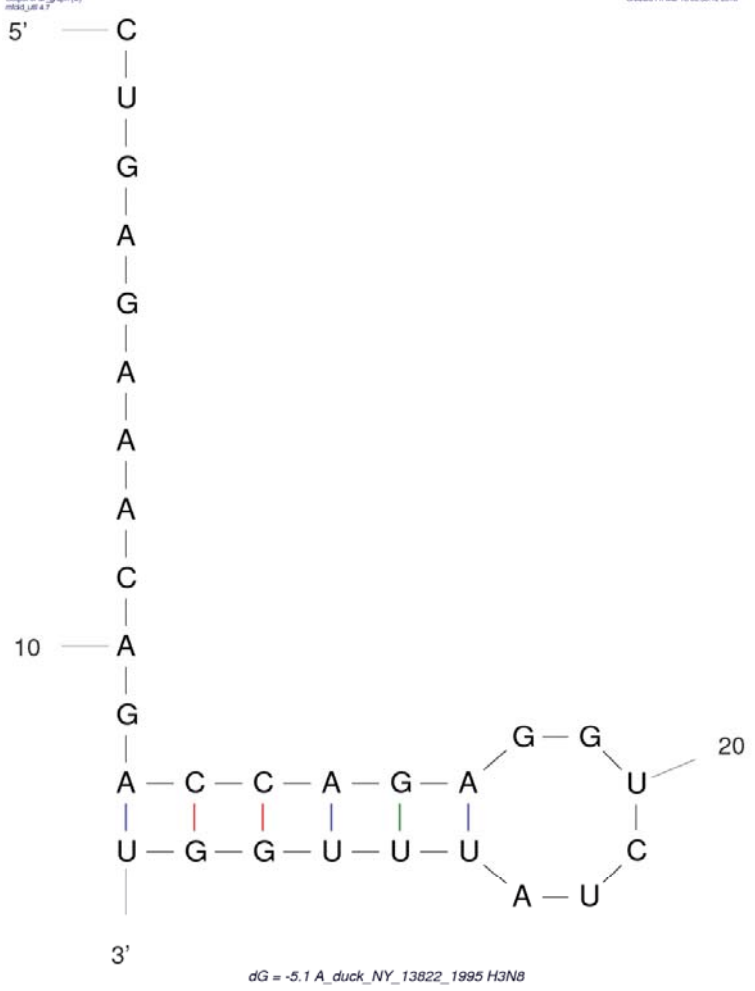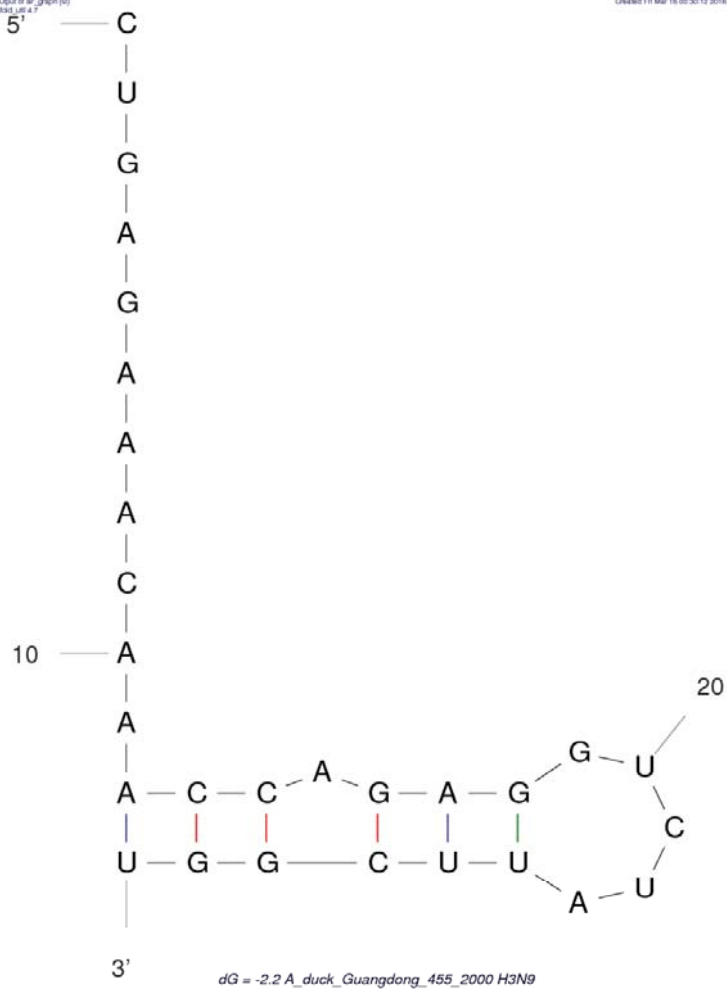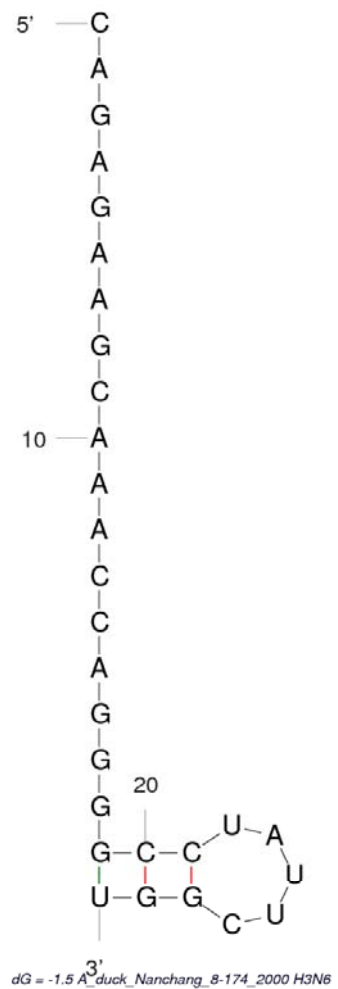



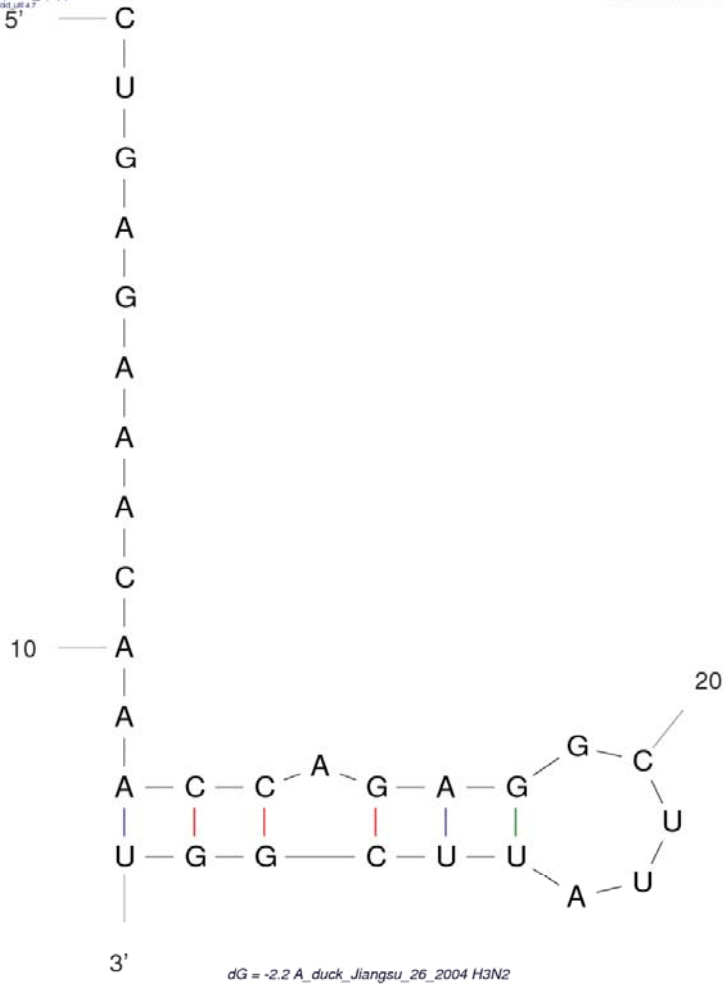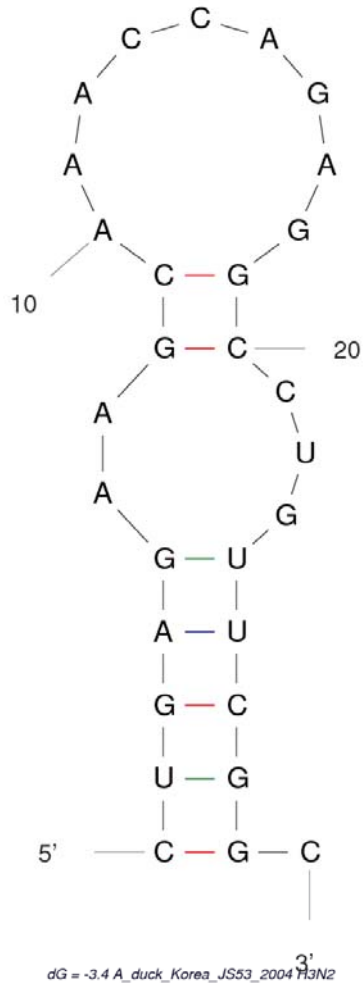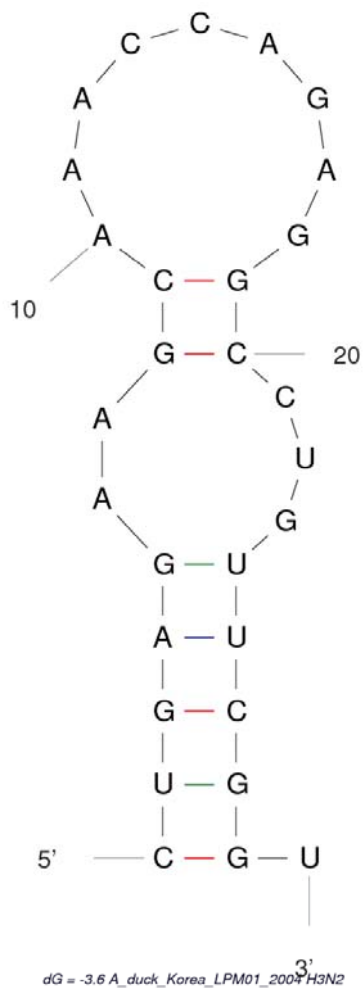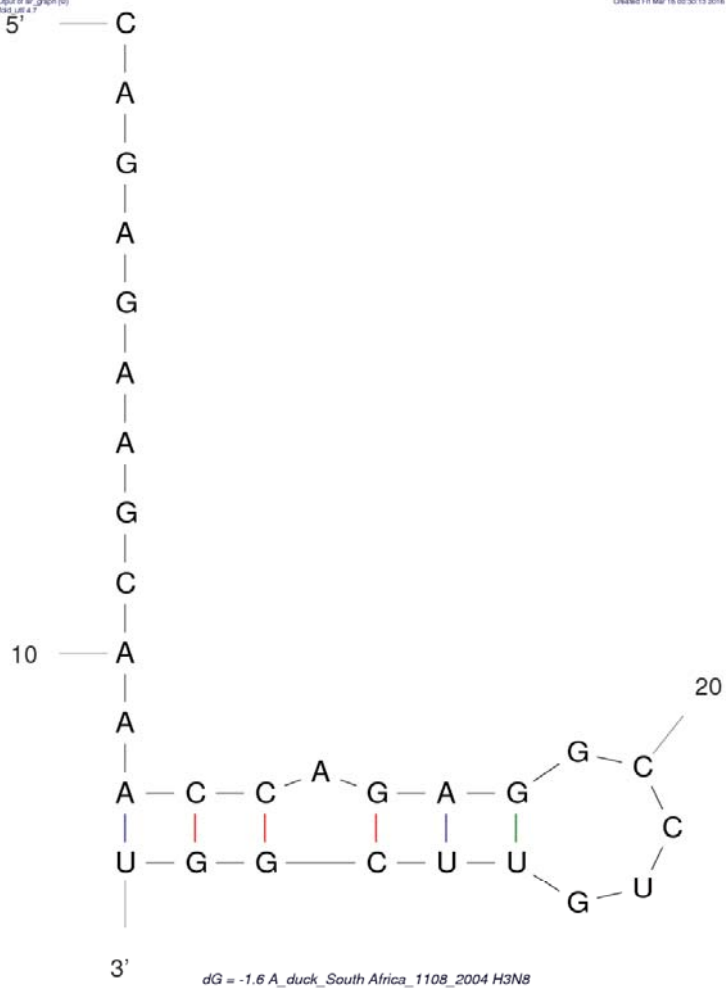

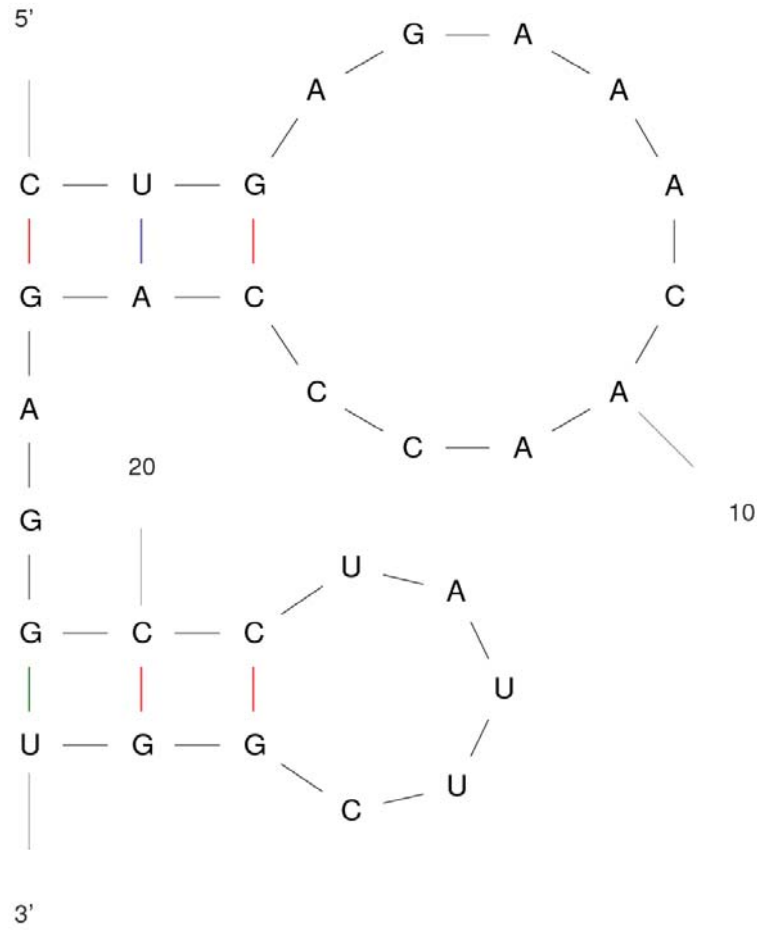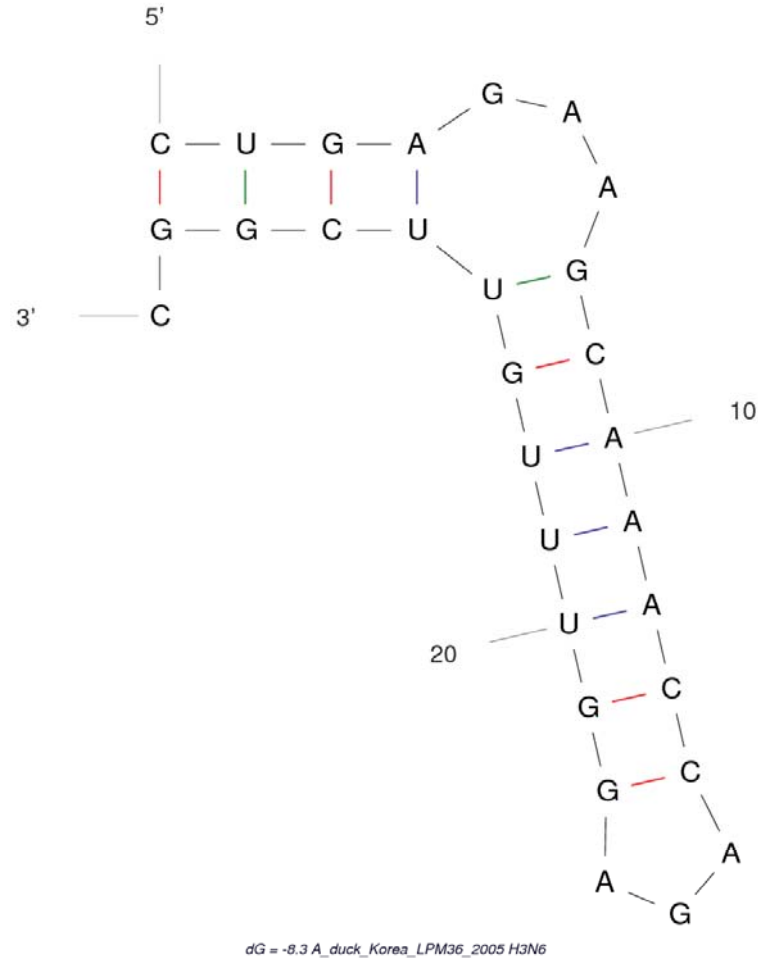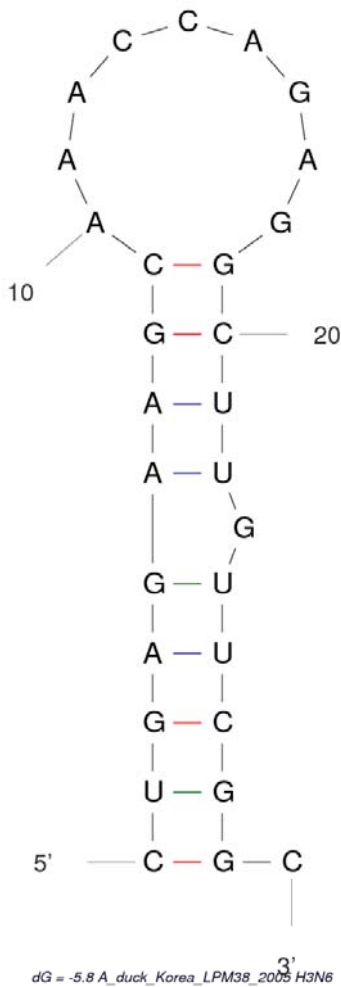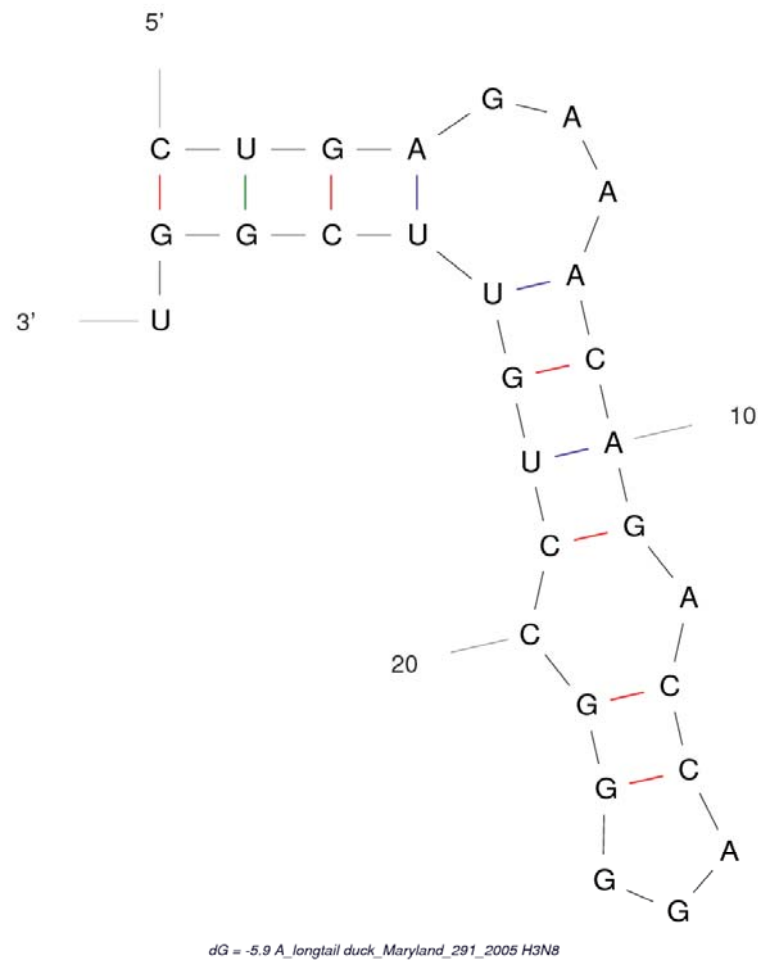

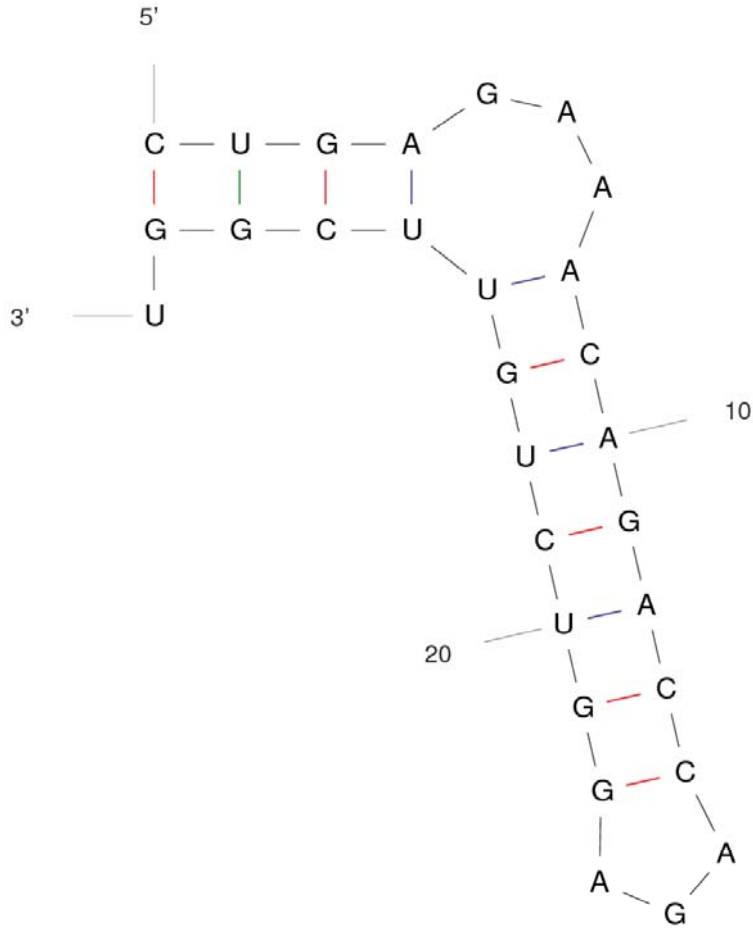

*dG = -10.9 A\_American black duck\_Quebec\_11235\_2006 H3N2*

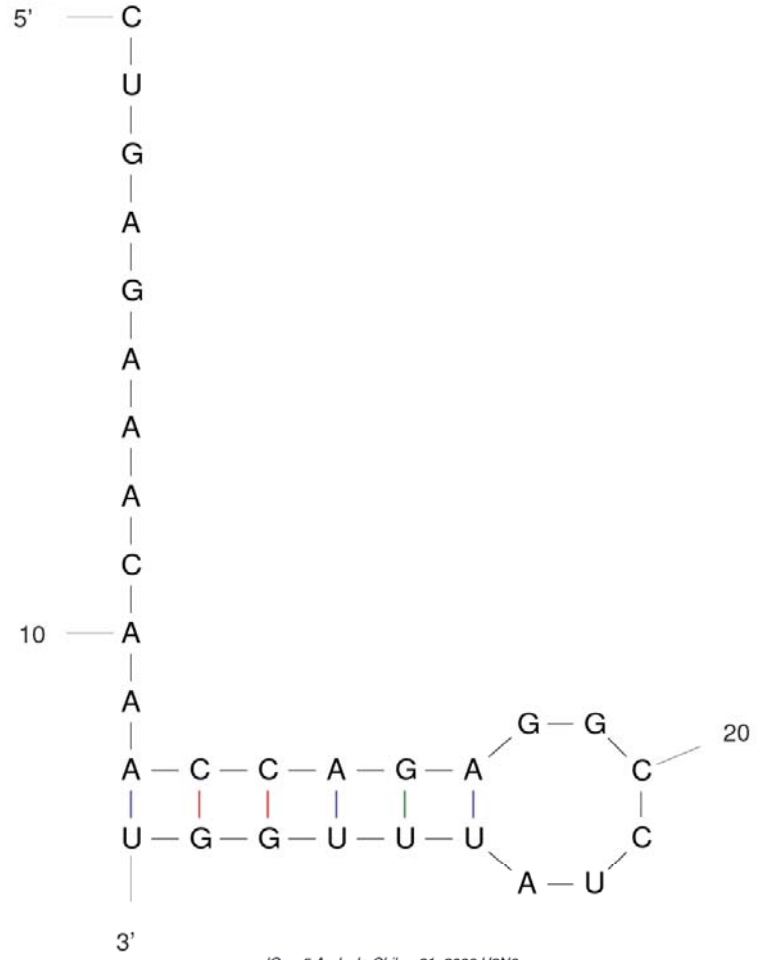

*dG = -5 A\_duck\_Chiba\_31\_2006 H3N8*

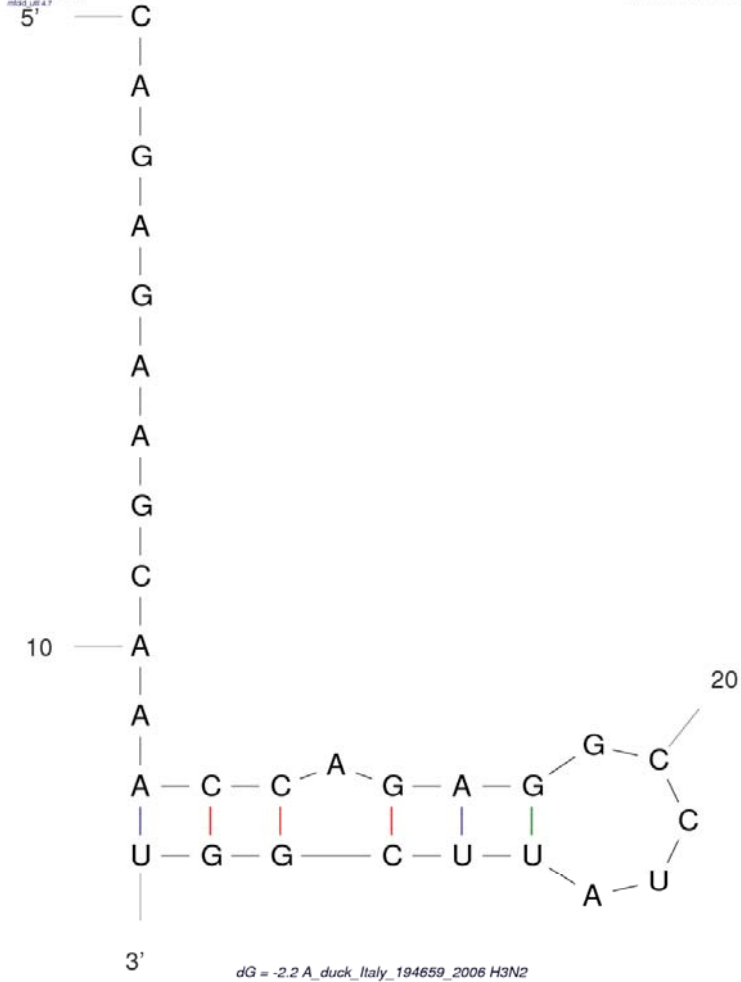

*dG = -2.2 A\_duck\_Italy\_194659\_2006 H3N2*

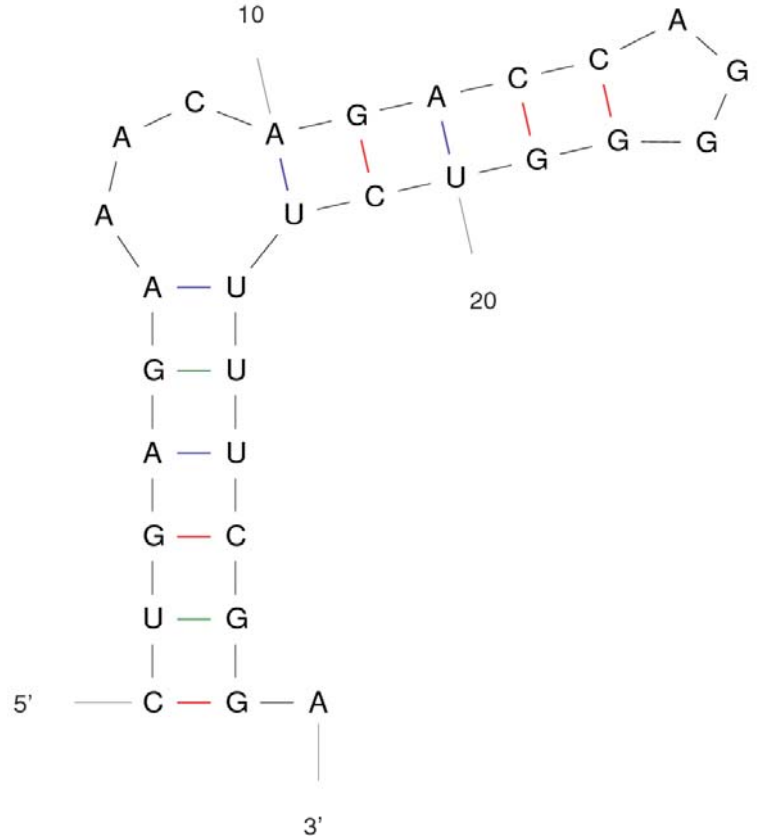

*dG = -9 A\_American black duck\_New Brunswick\_02656\_2007 H3N8*

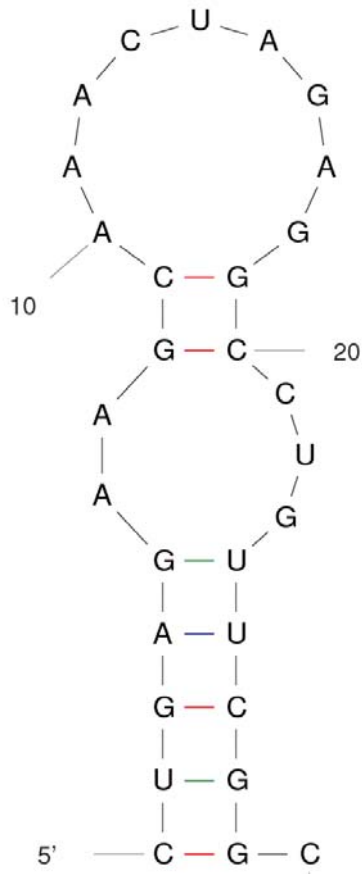

dG = -3.4 A\_duck\_Korea\_HP68\_2007 H3N6

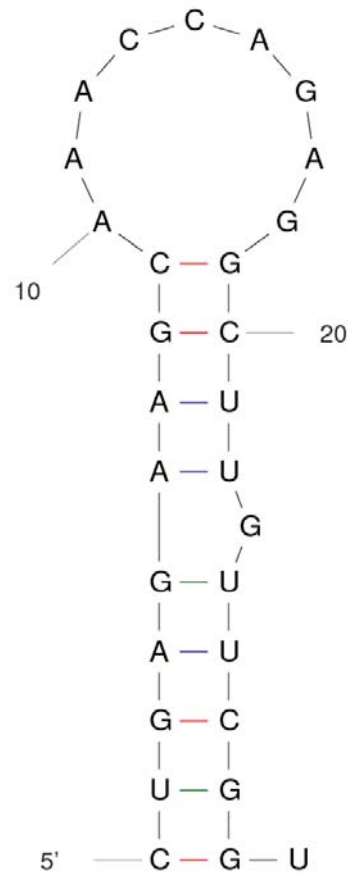

dG = -6 A\_duck\_Korea\_U14-1\_2007 H3N2

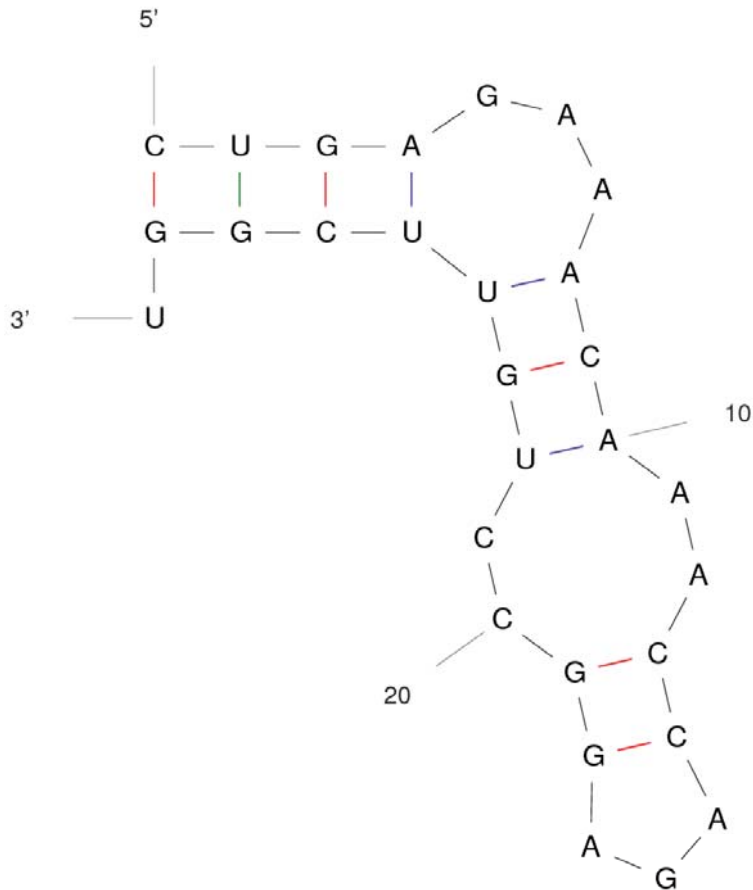

dG = -2.5 A\_duck\_Korea\_U2-5\_2007 H3N8

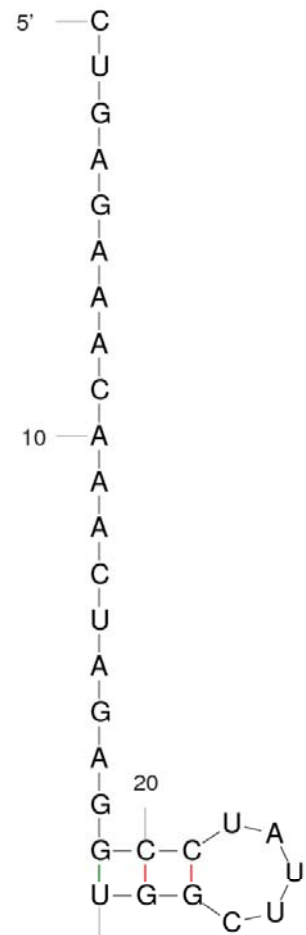

dG = -1.5 A\_duck\_Korea\_U5-2\_2007 H3N8

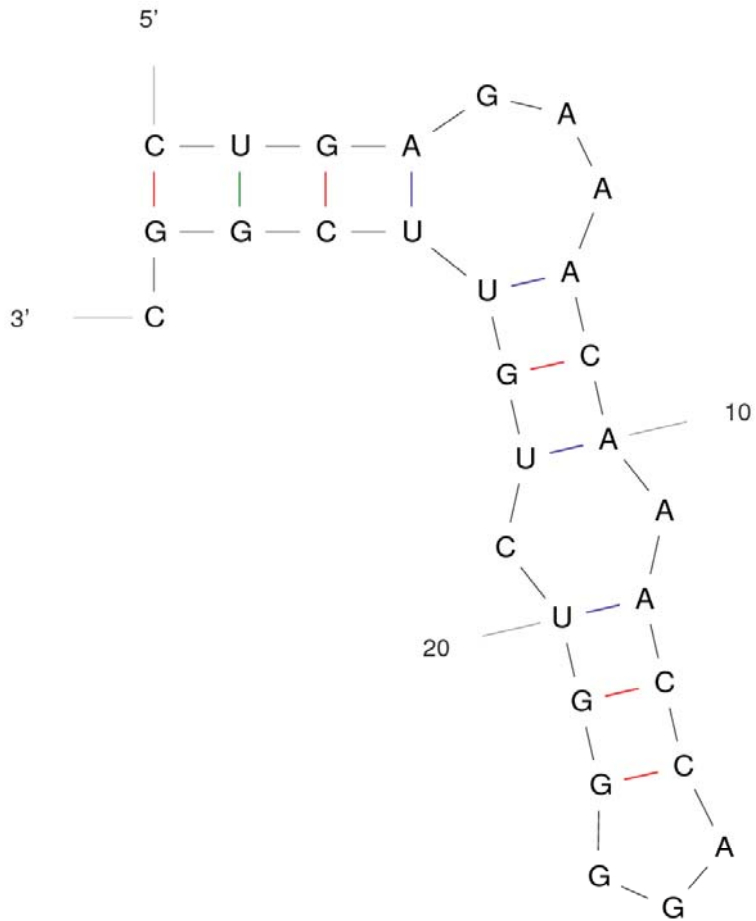

dG = -4.5 A\_ring-necked duck\_Minnesota\_Sg-00066\_2007 MixedH3

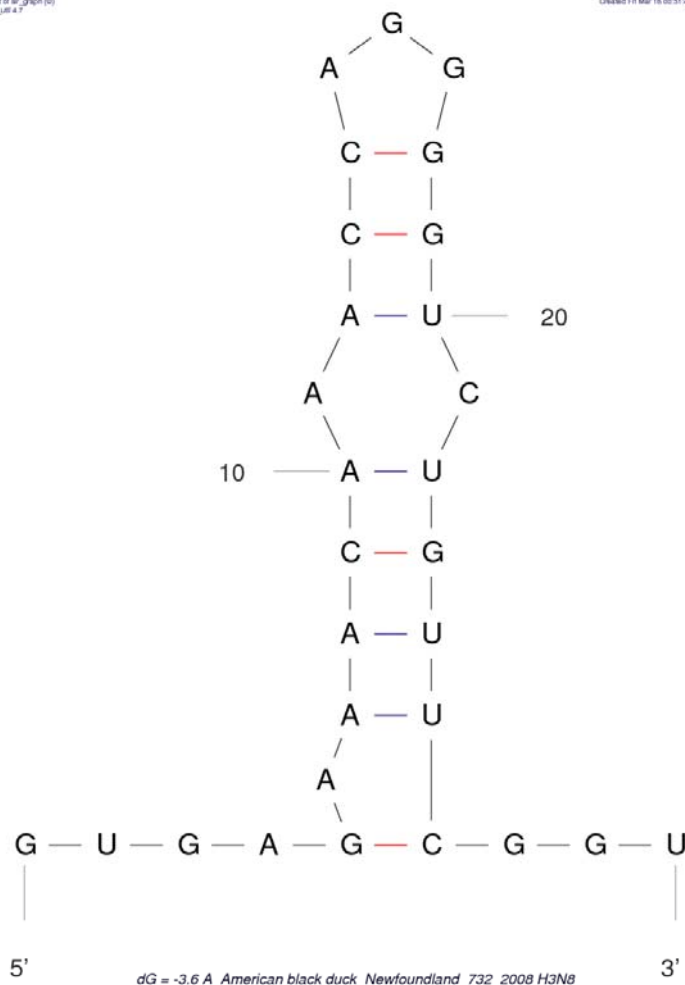

dG = -3.6 A\_American black duck\_Newfoundland\_732\_2008 H3N8

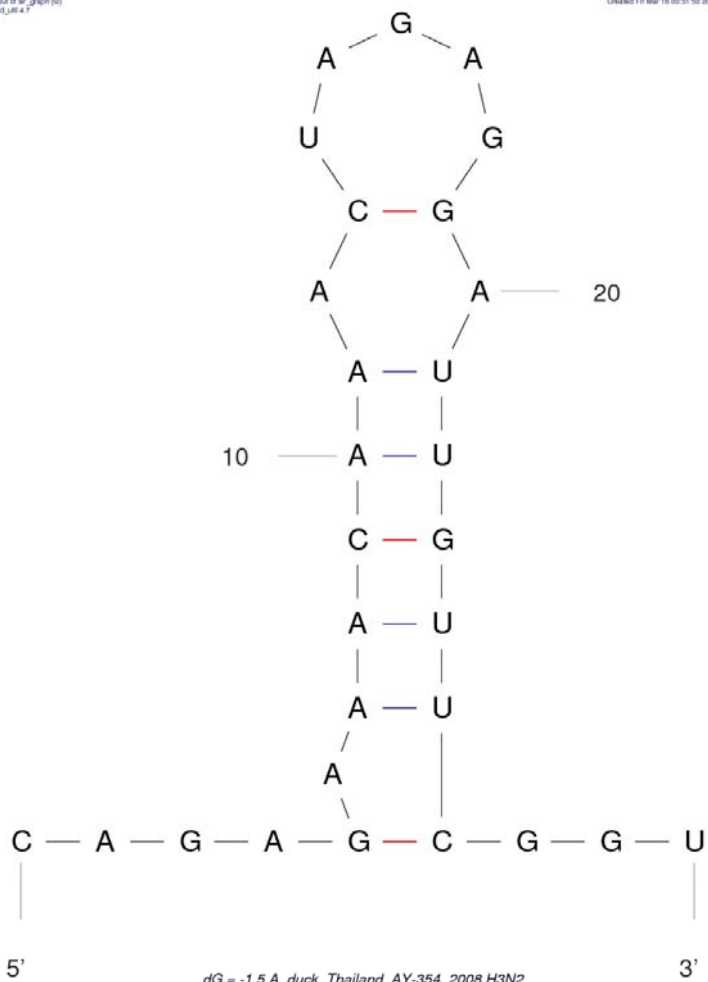

dG = -1.5 A\_duck\_Thailand\_AY-354\_2008 H3N2

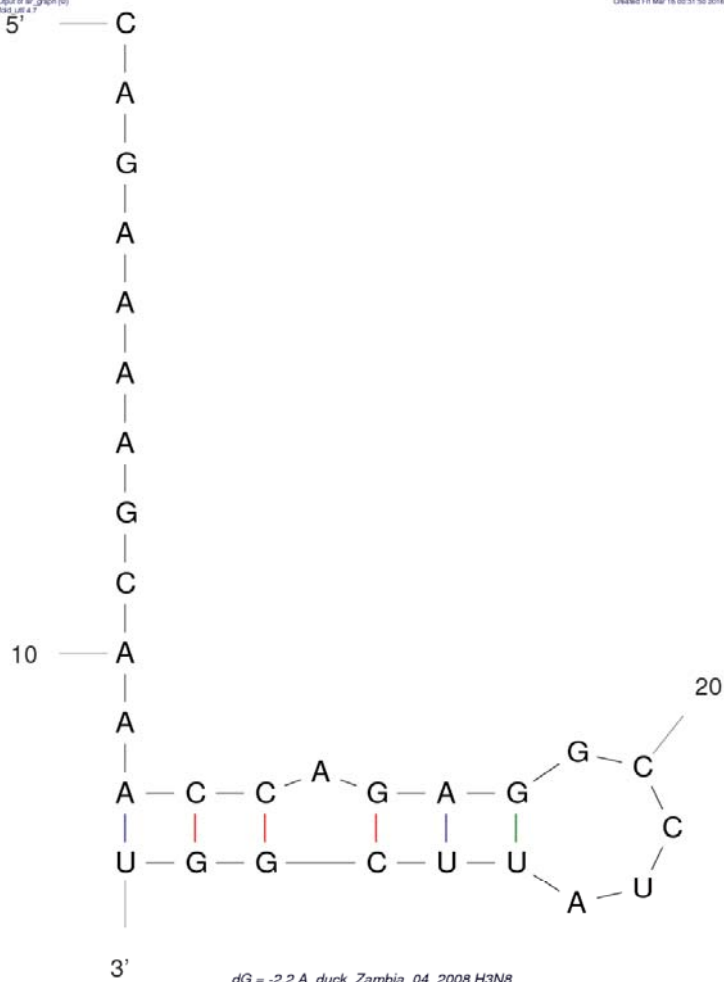

dG = -2.2 A\_duck\_Zambia\_04\_2008 H3N8

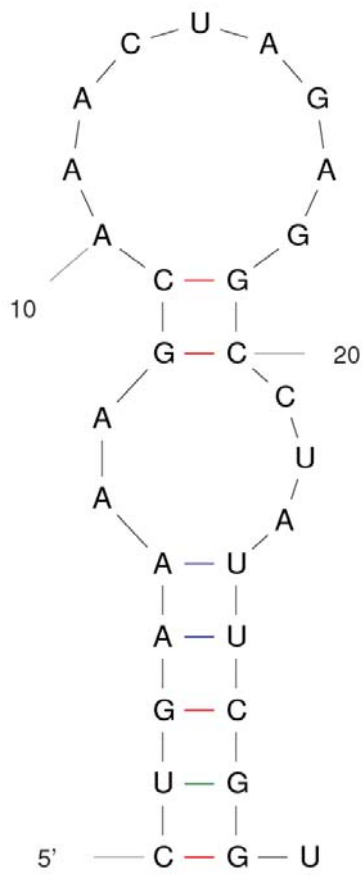

dG = -2.8 A\_duck\_Jiangxi\_3779\_2009 mixedH3

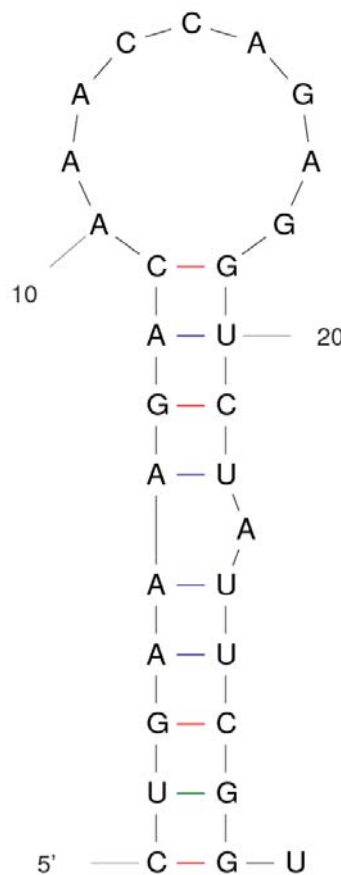

dG = -6.2 A\_duck\_Shanghai\_C84\_2009 H3N2

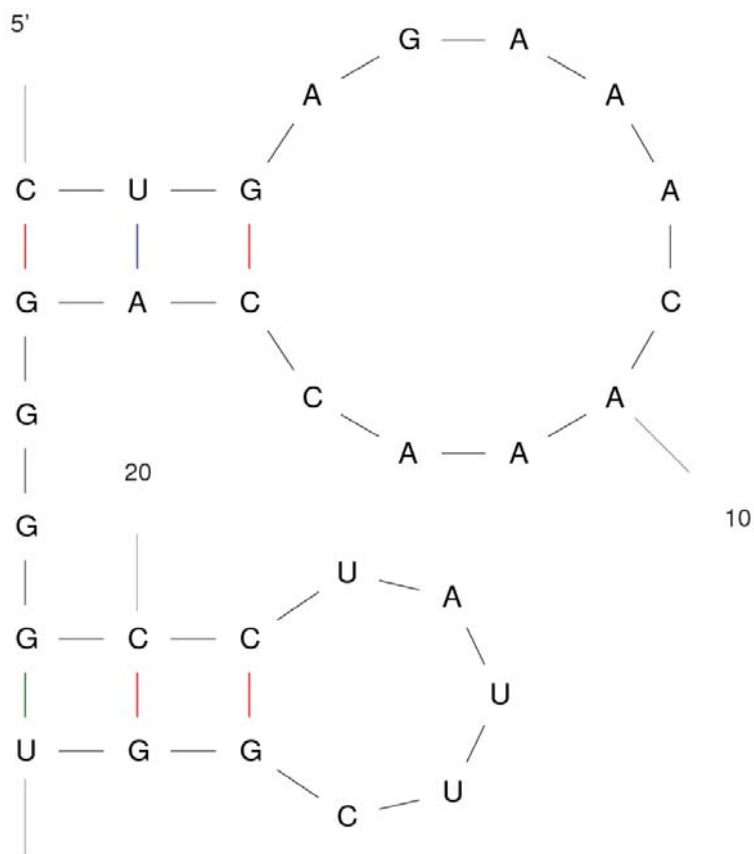

dG = -2 A\_duck\_Vietnam\_OIE-2382\_2009 H3N2

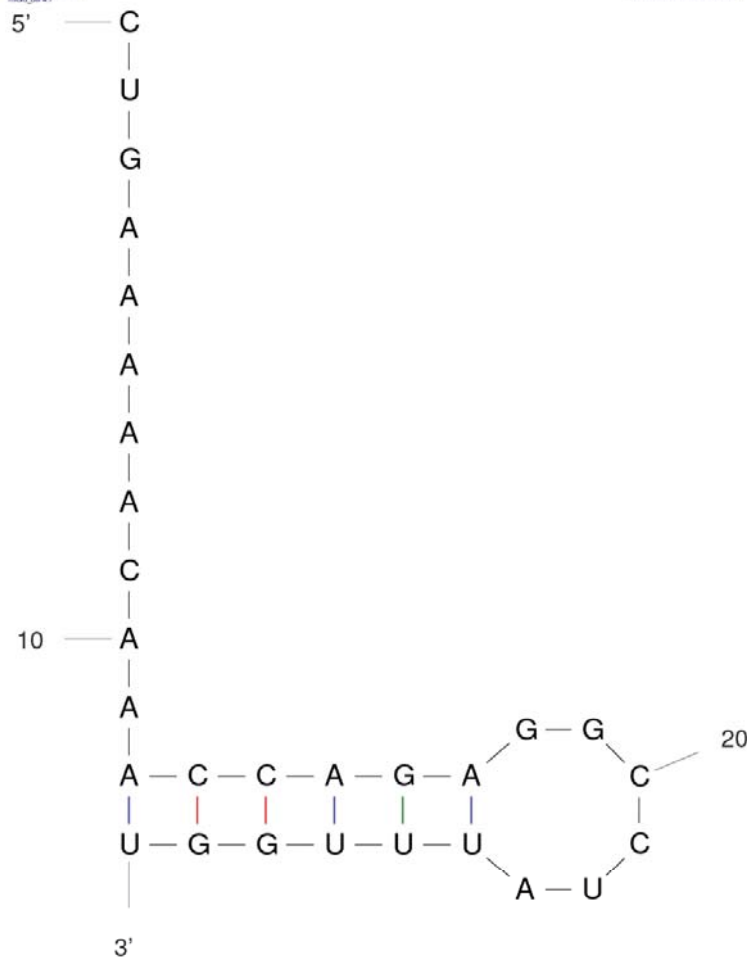

dG = -5 A\_duck\_Vietnam\_OIE-2403\_2009 H3N8

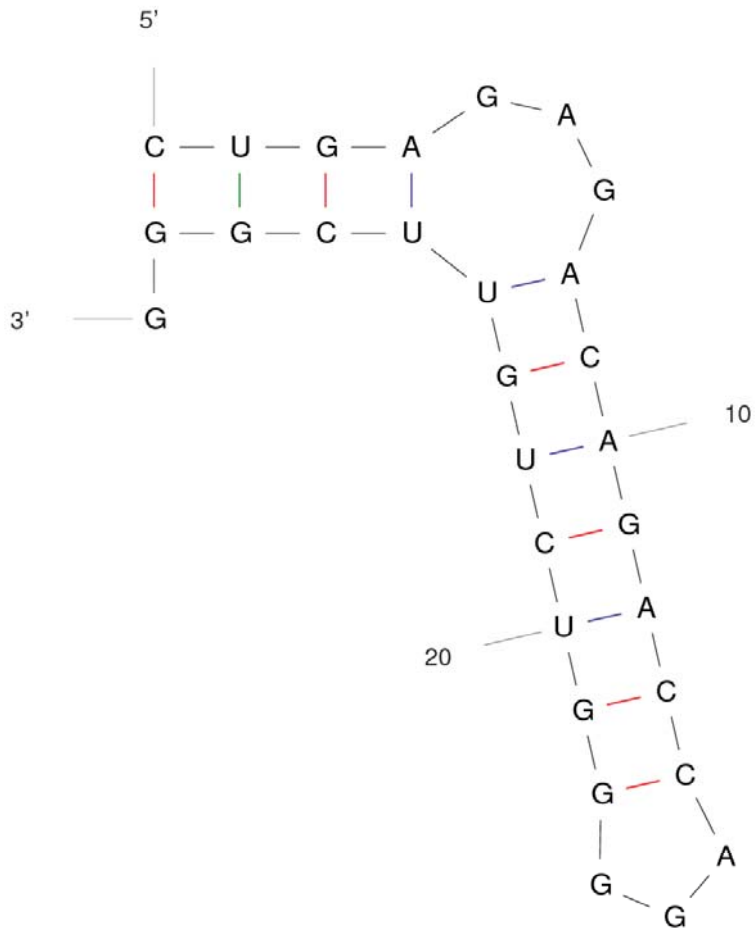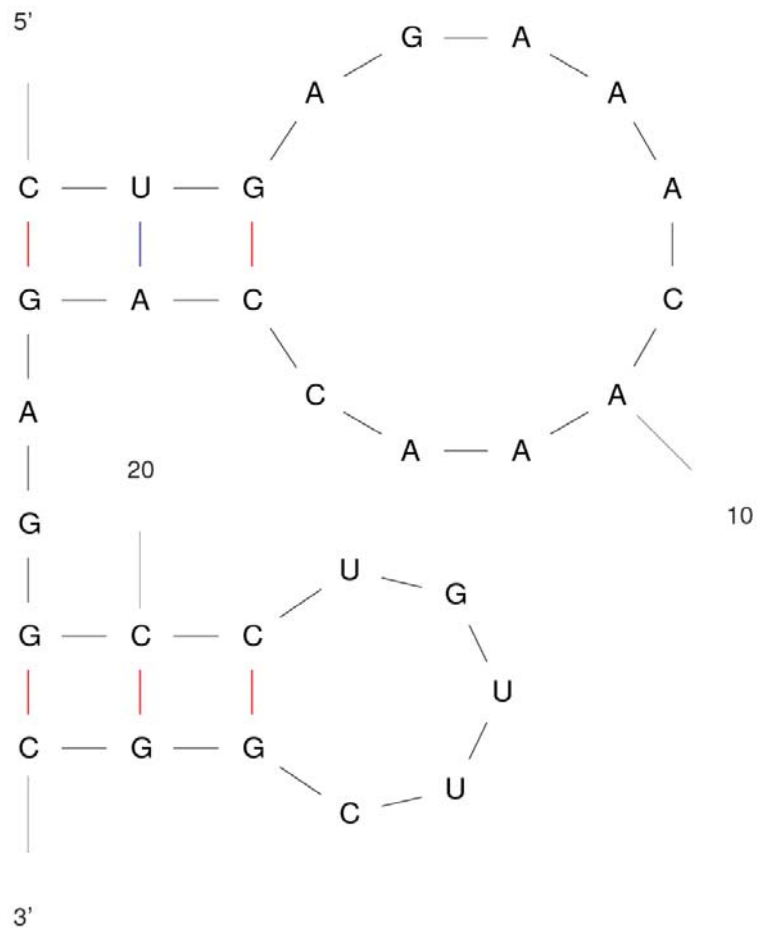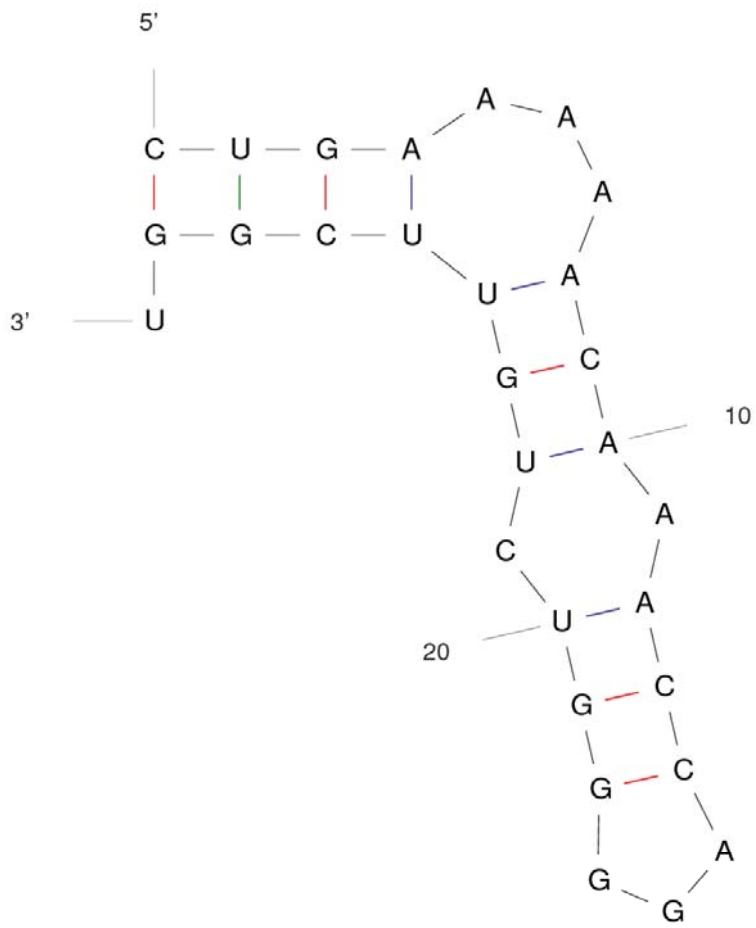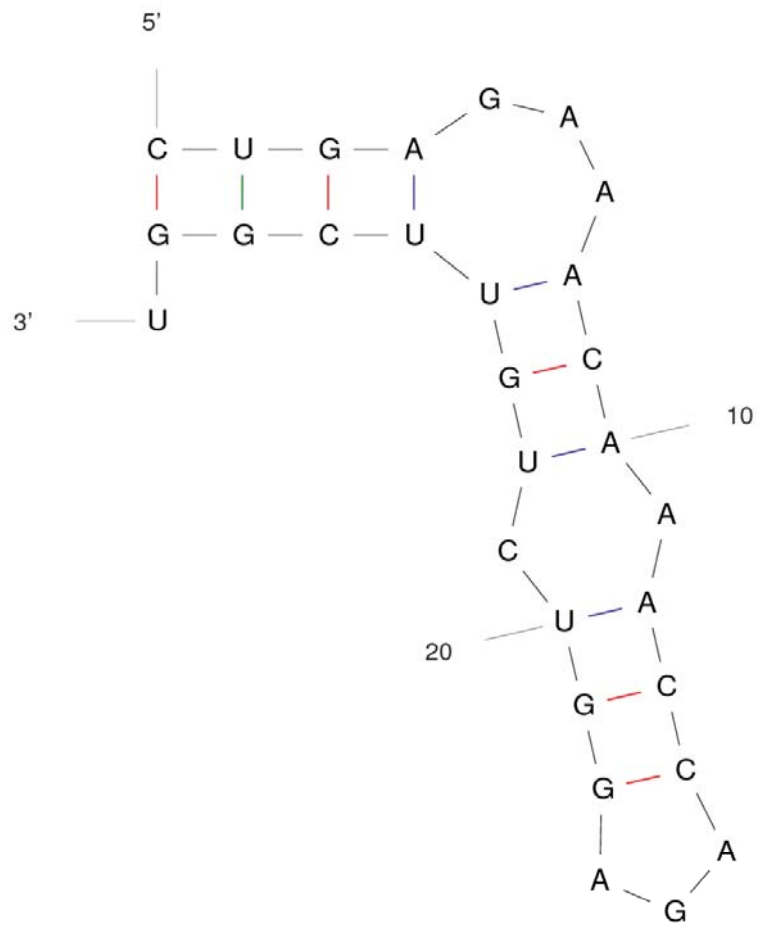

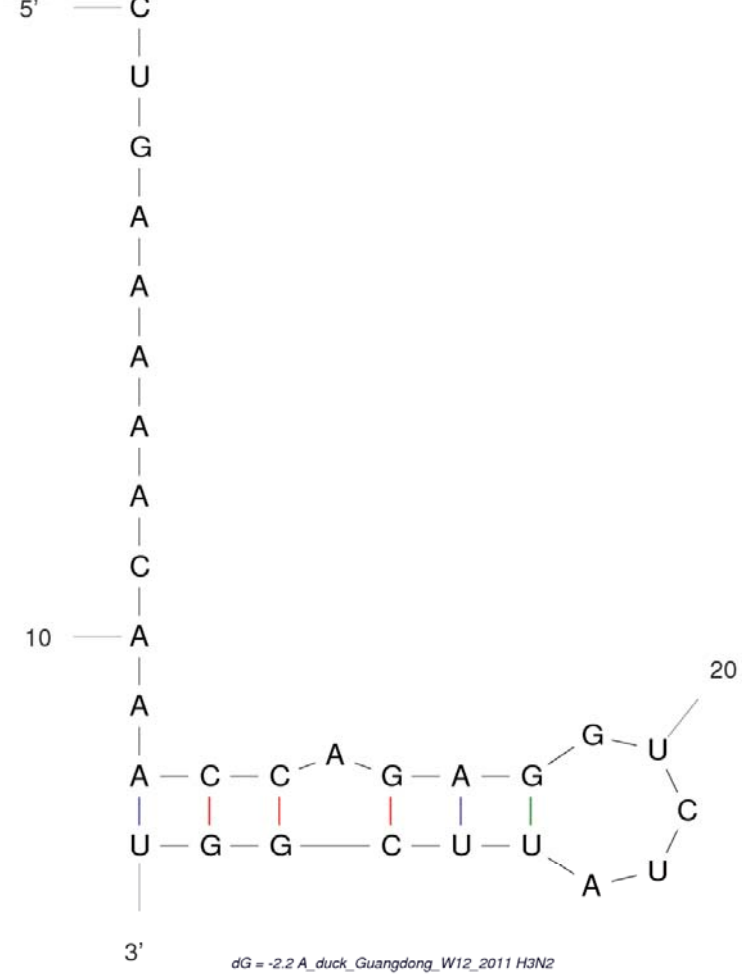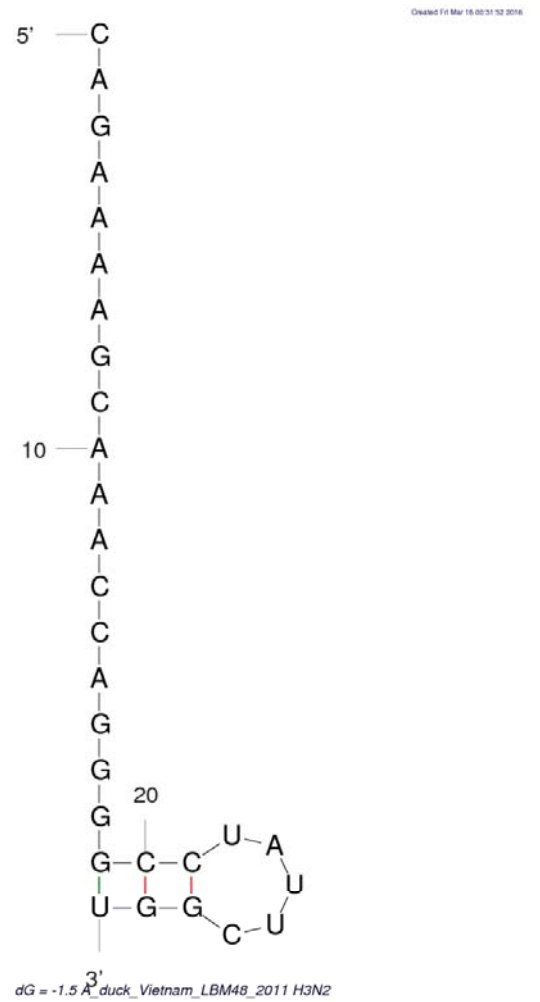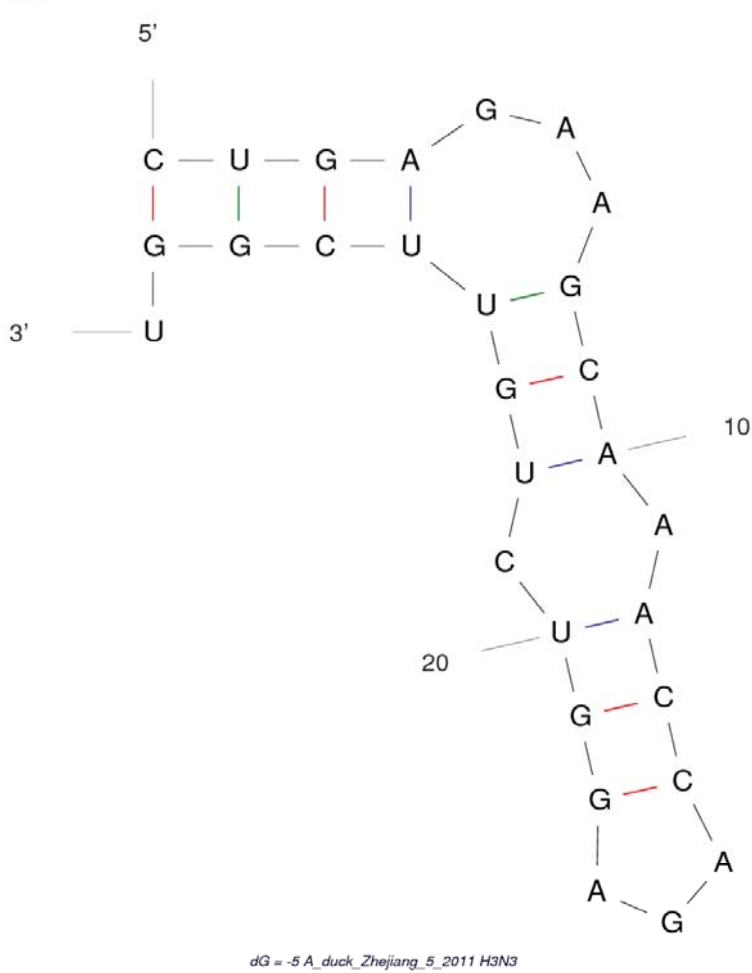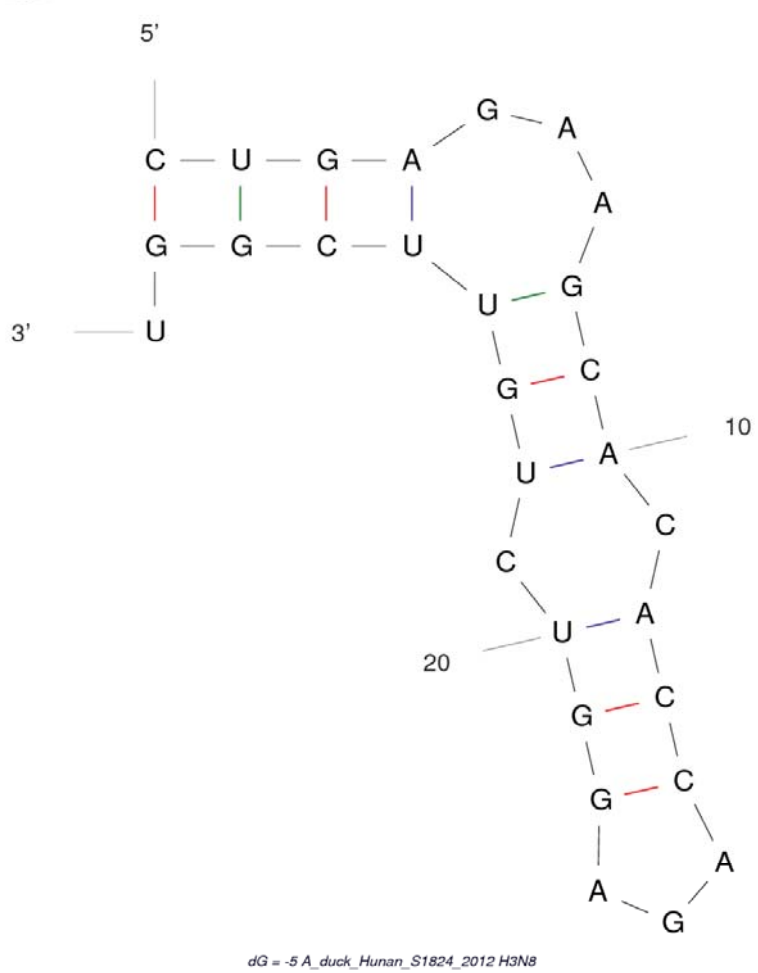



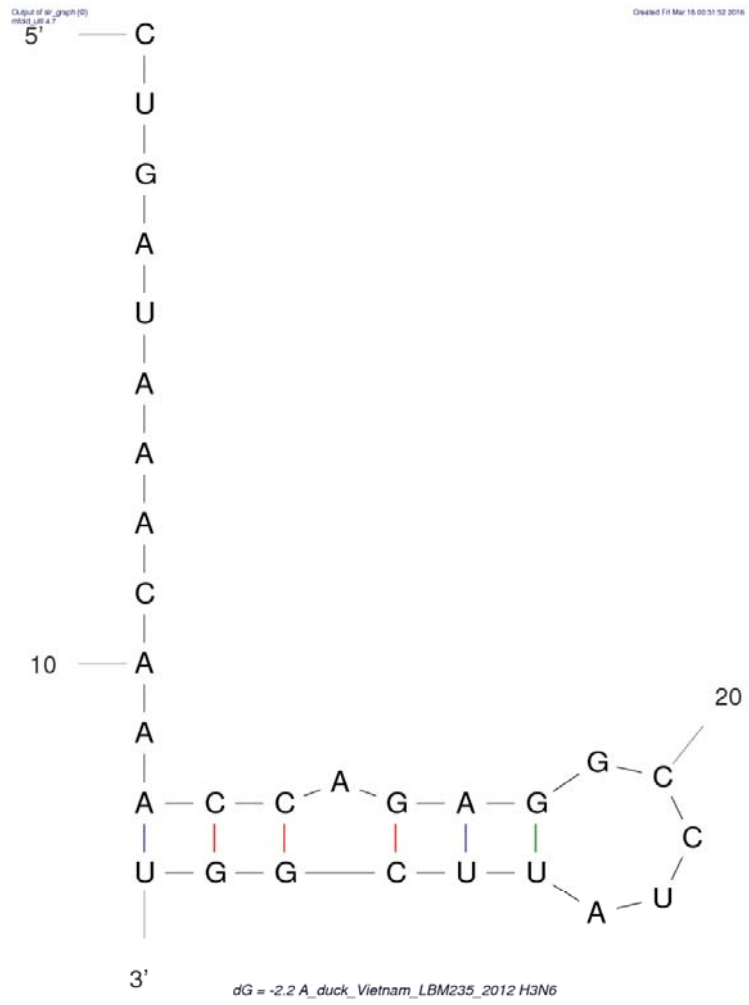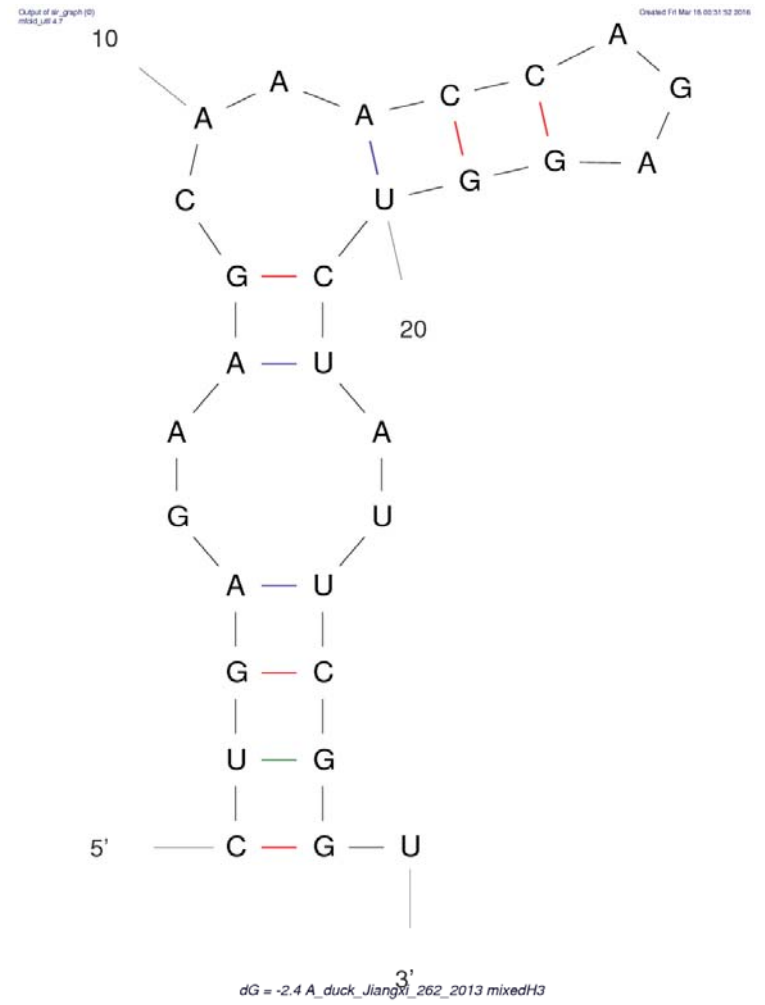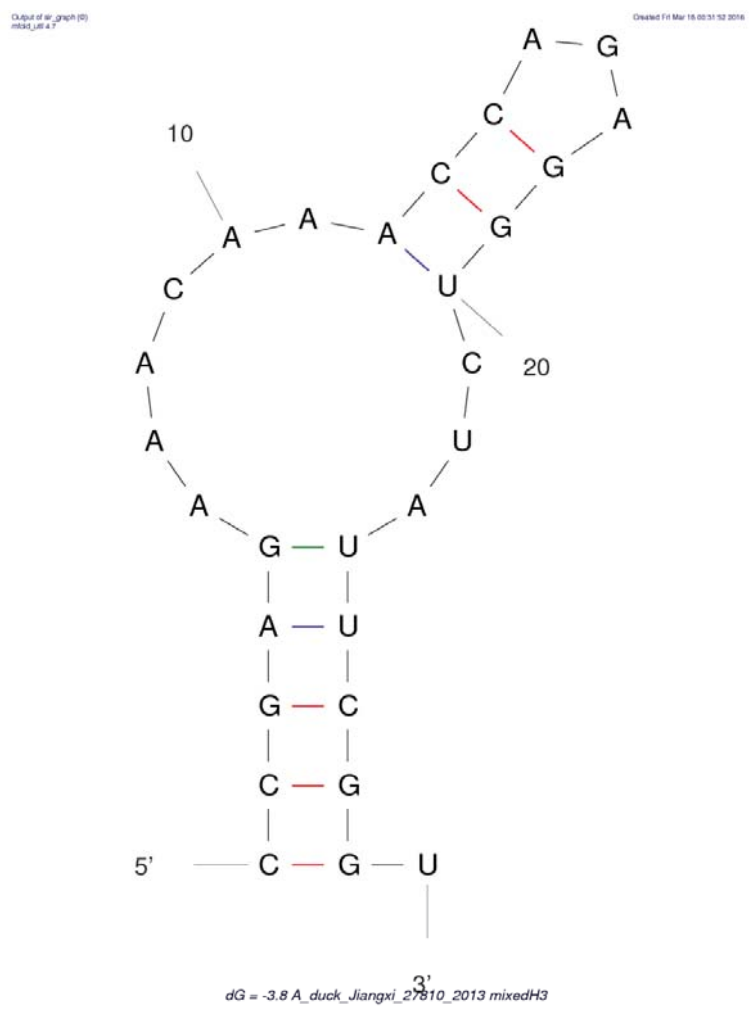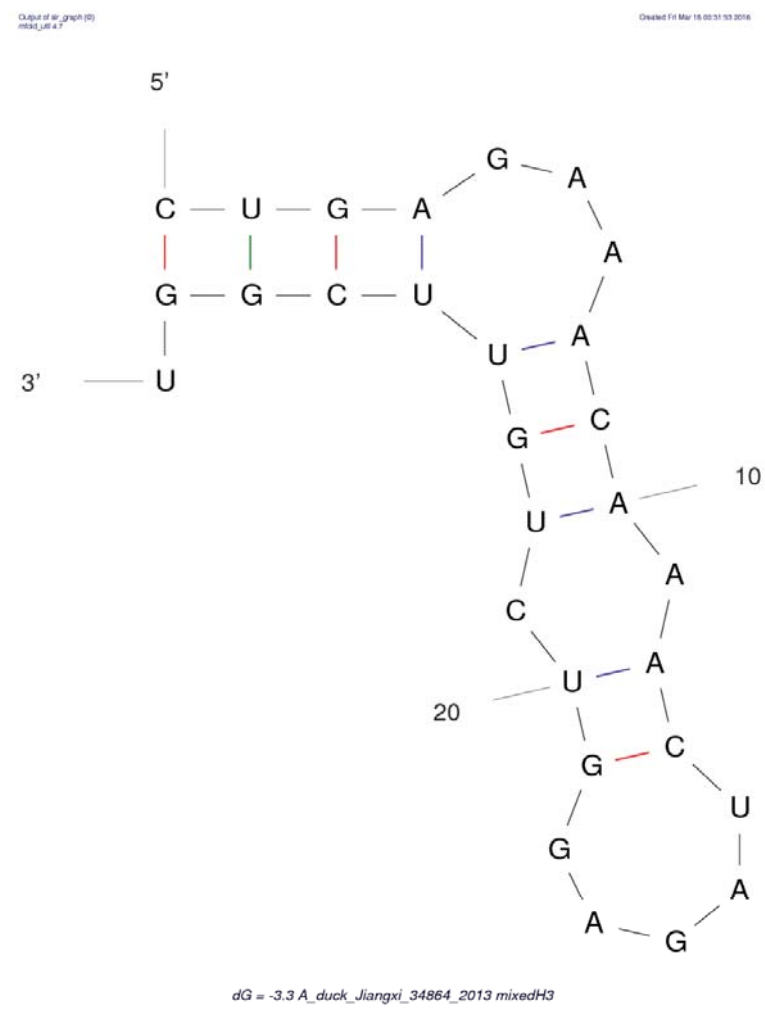

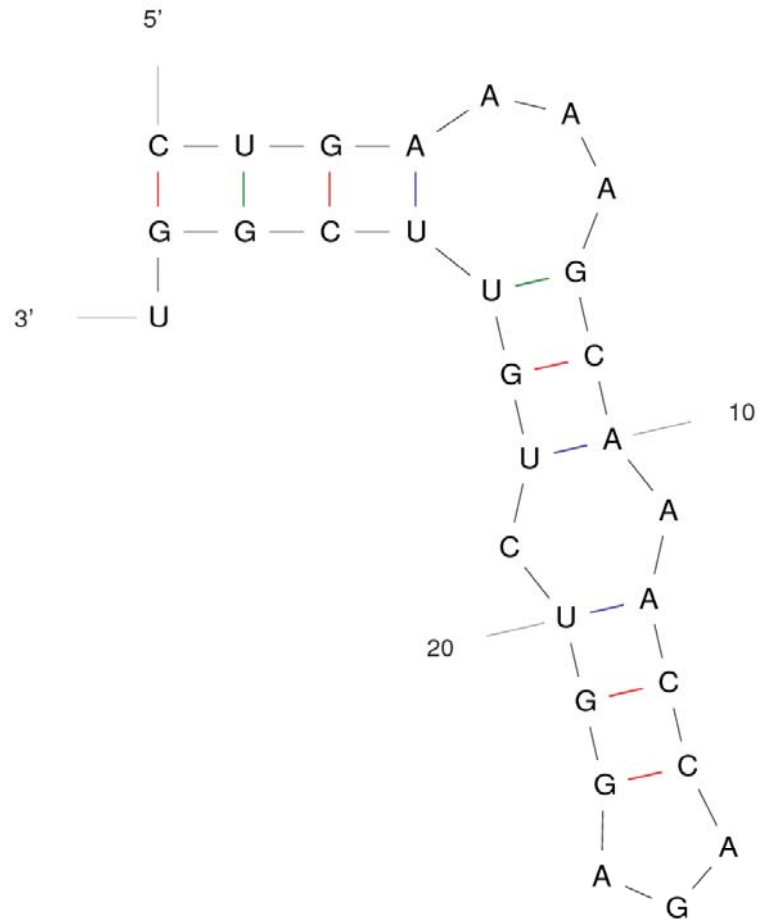

dG = -5 A\_duck\_Shanghai\_SH1\_2013 H3N2

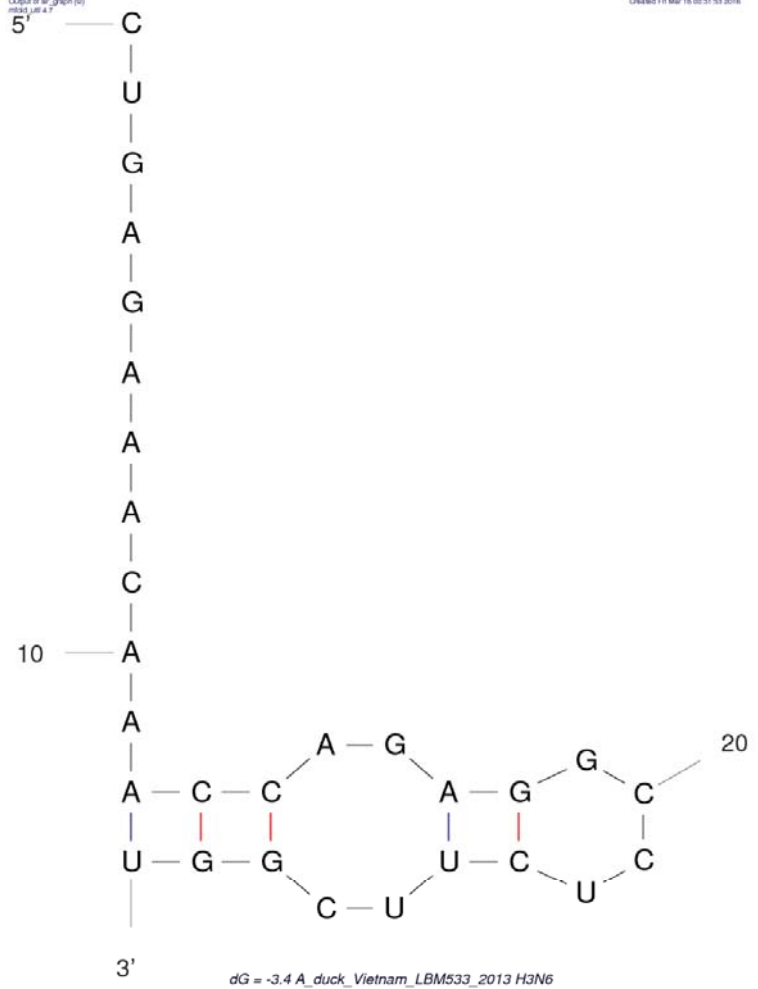

dG = -3.4 A\_duck\_Vietnam\_LBM533\_2013 H3N6

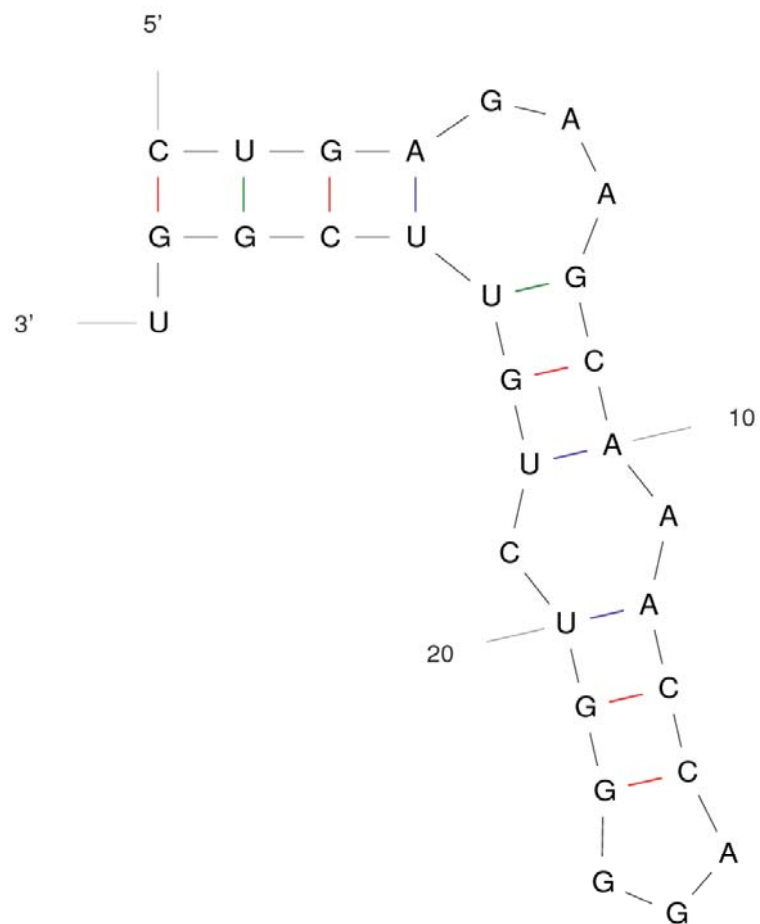

dG = -5 A\_wood duck\_Ohio\_13OS3300\_2013 H3N8

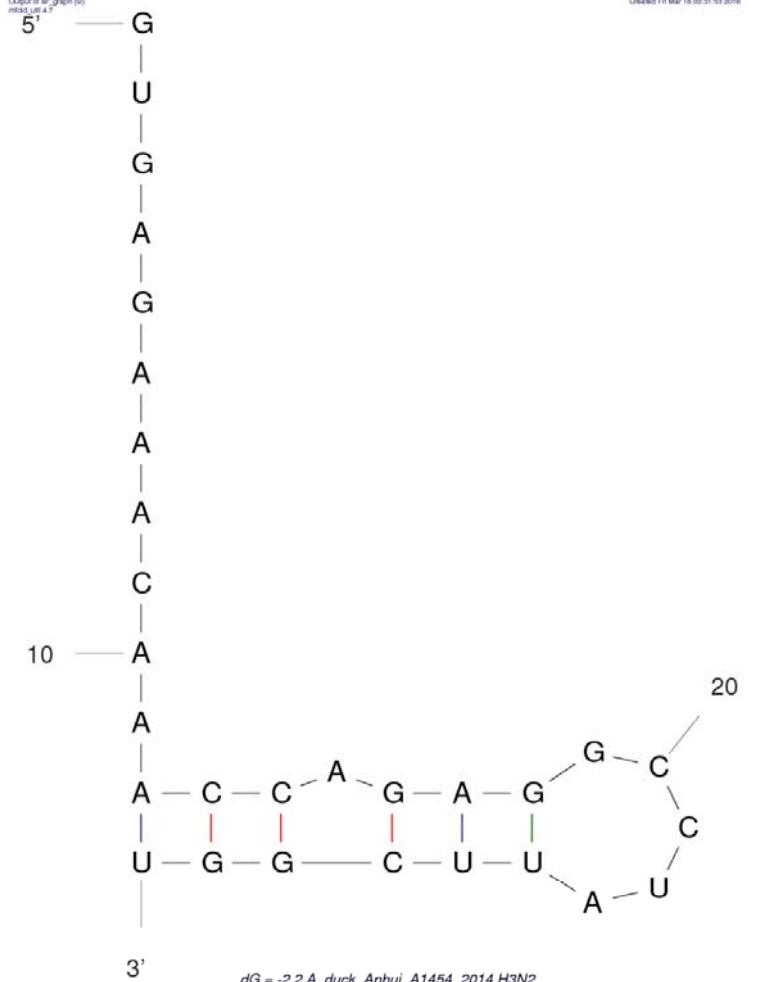

dG = -2.2 A\_duck\_Anhui\_A1454\_2014 H3N2

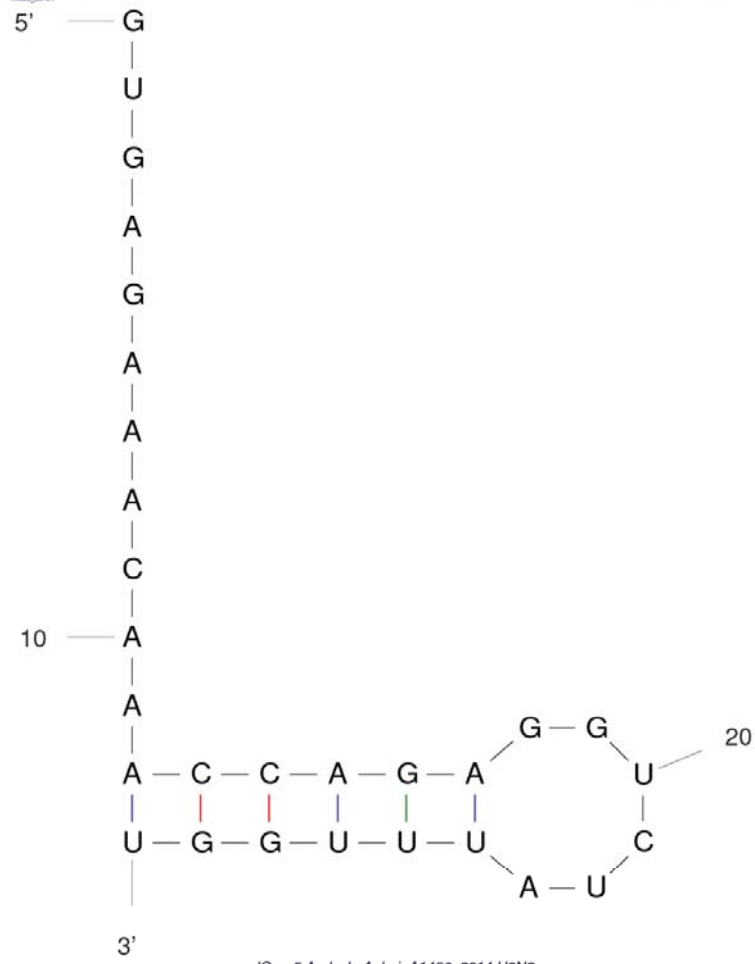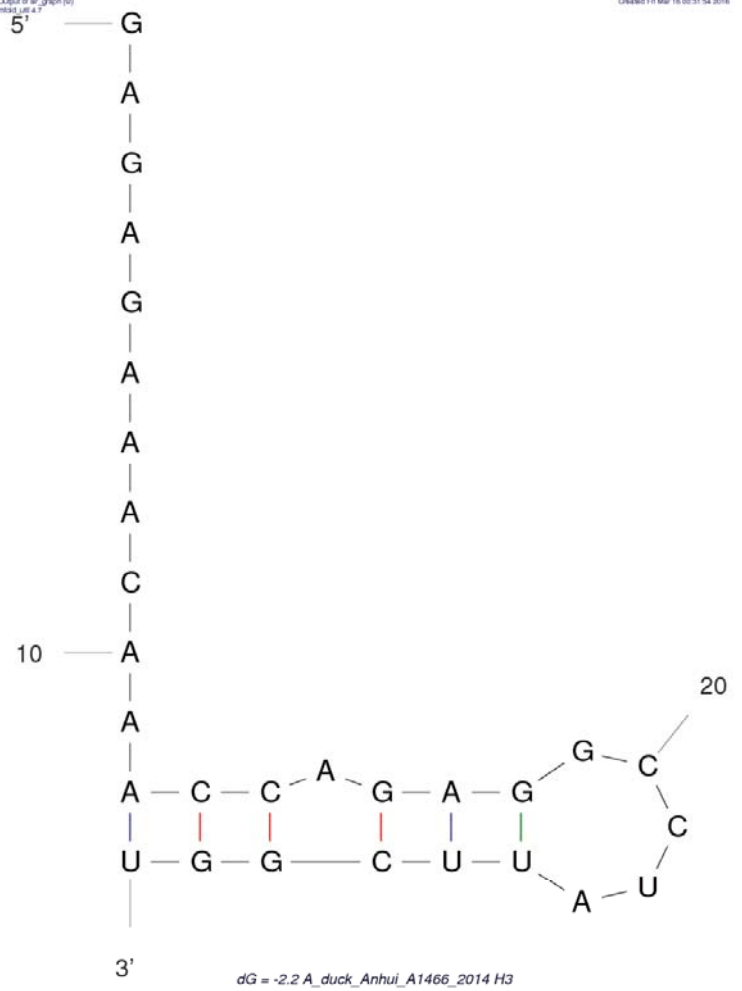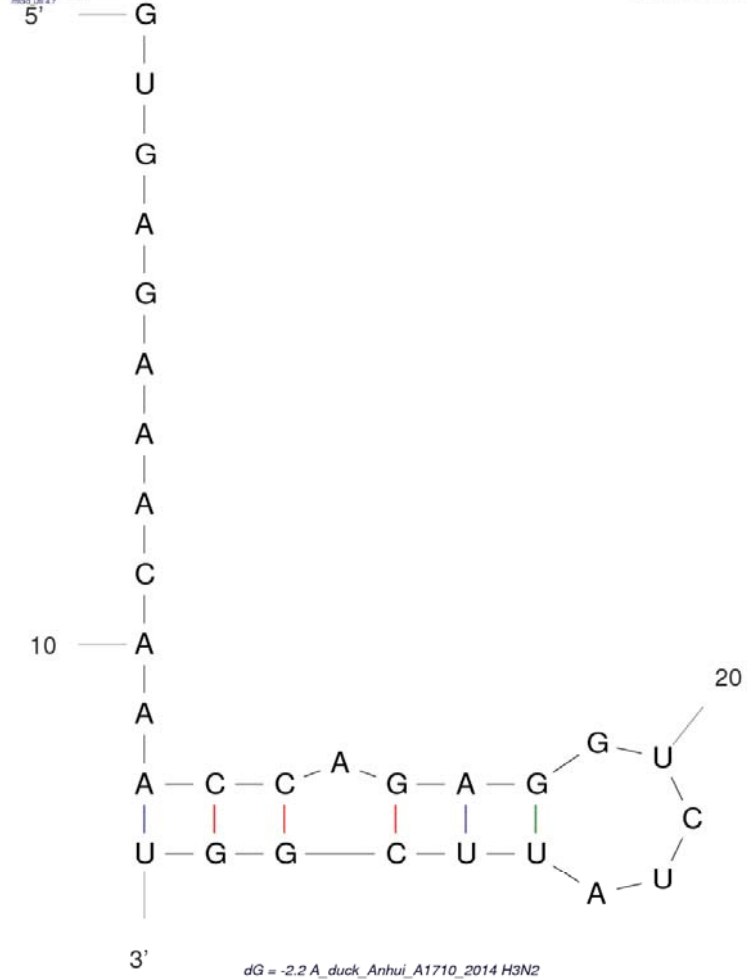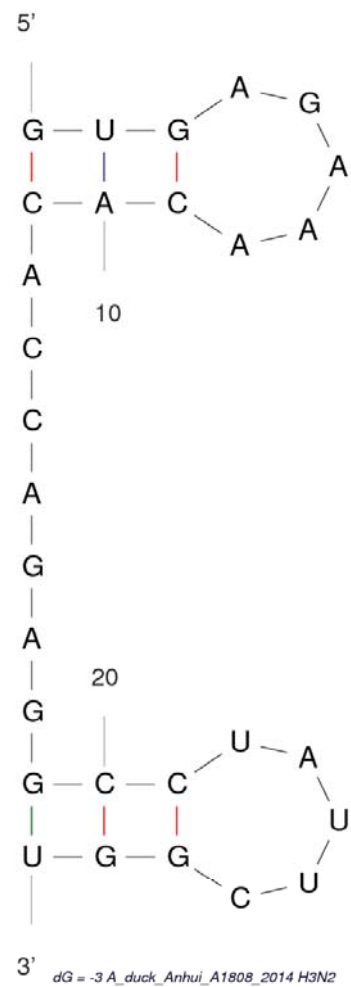

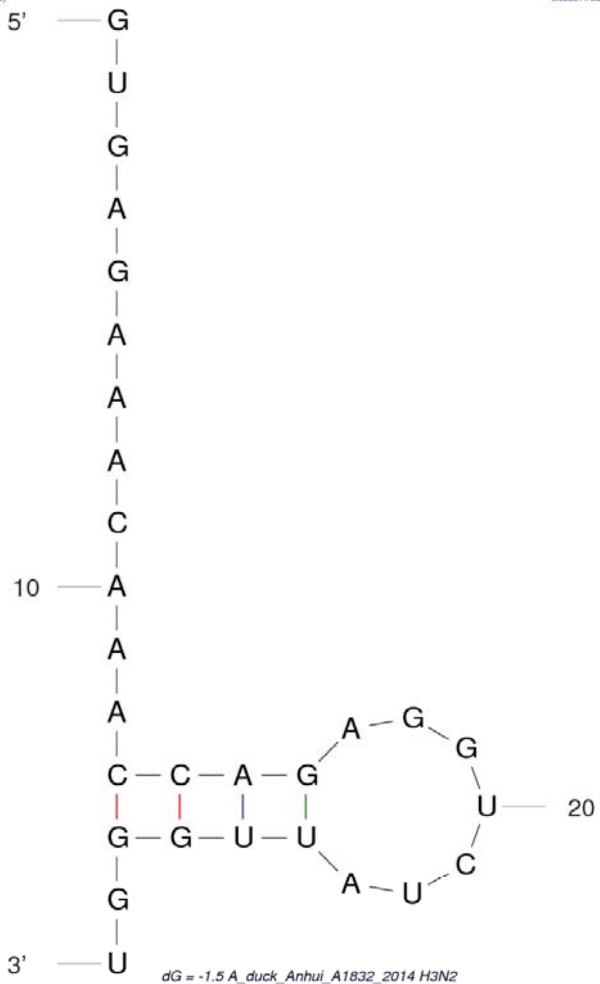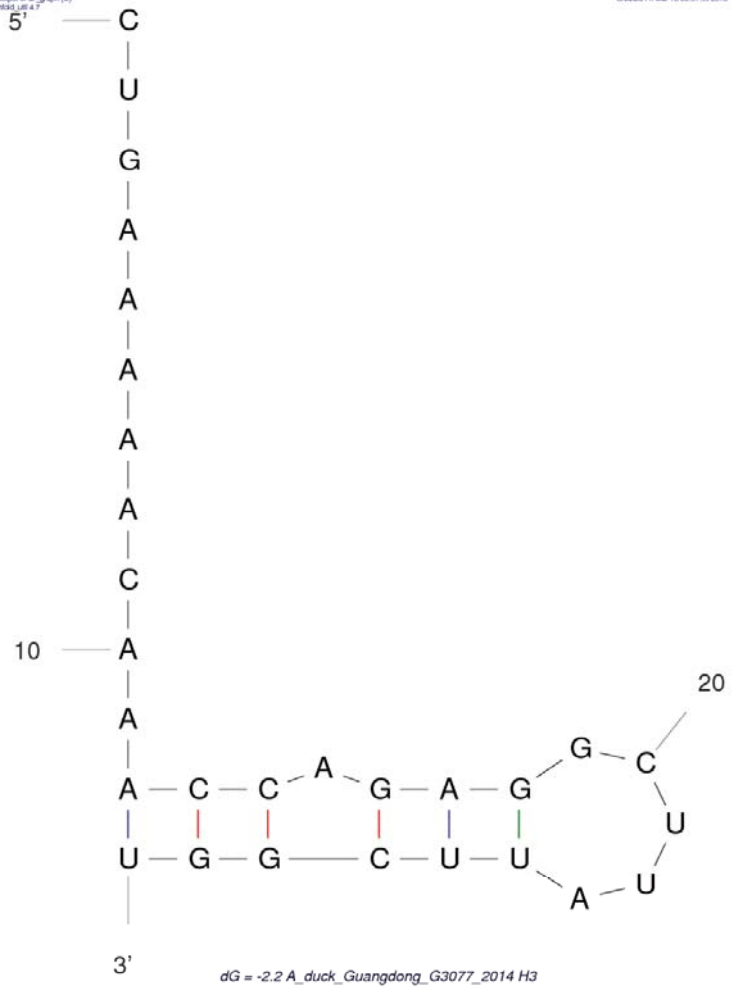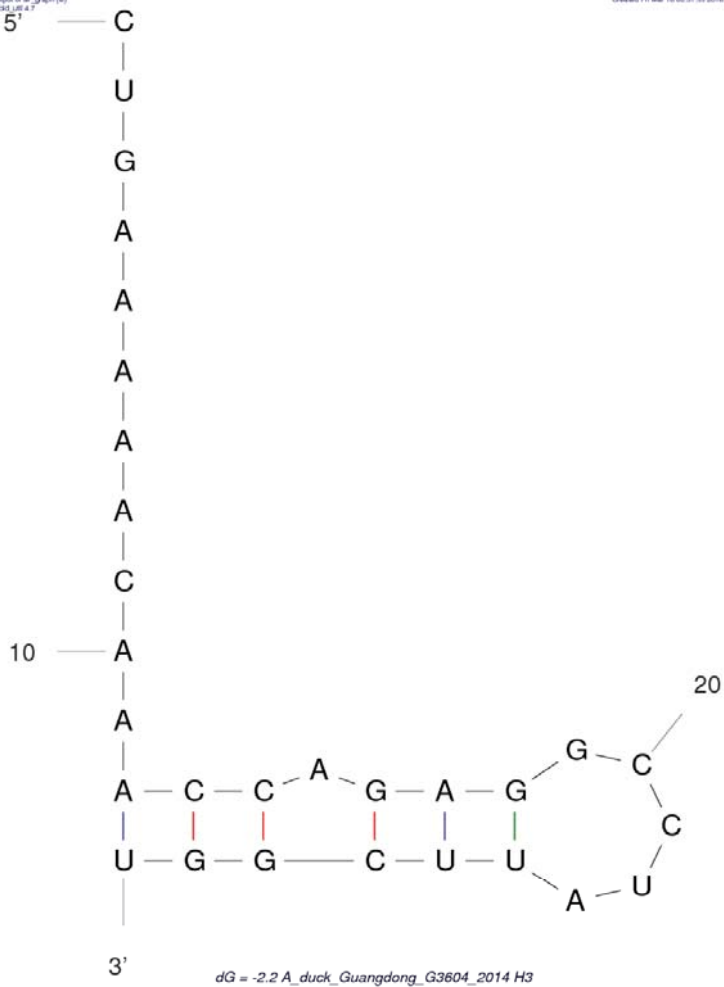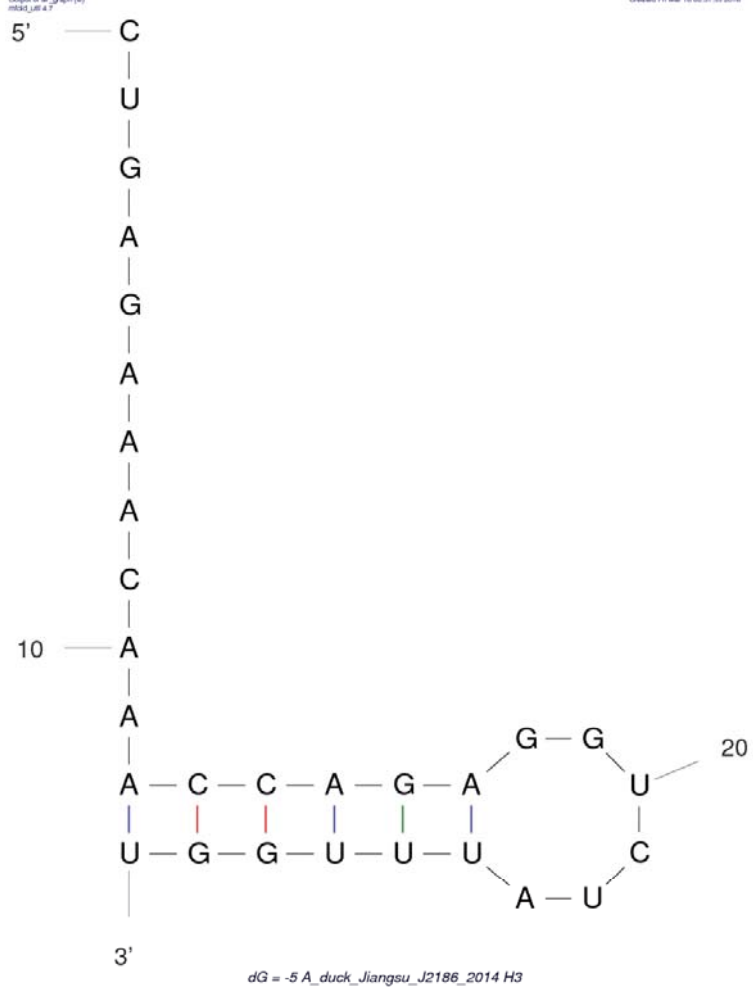

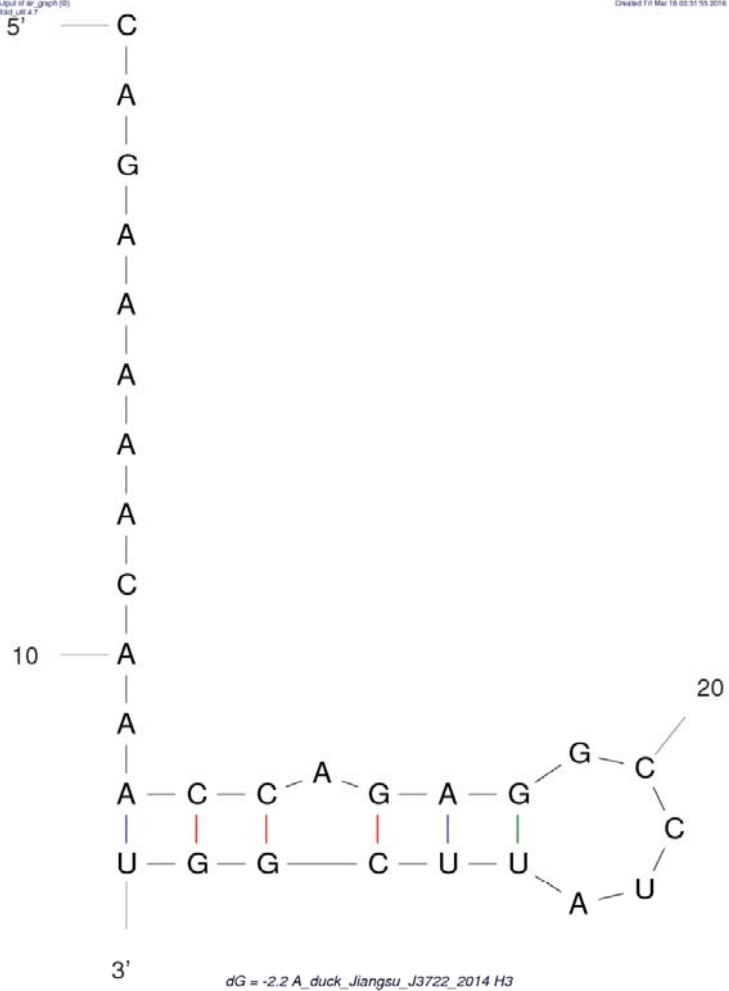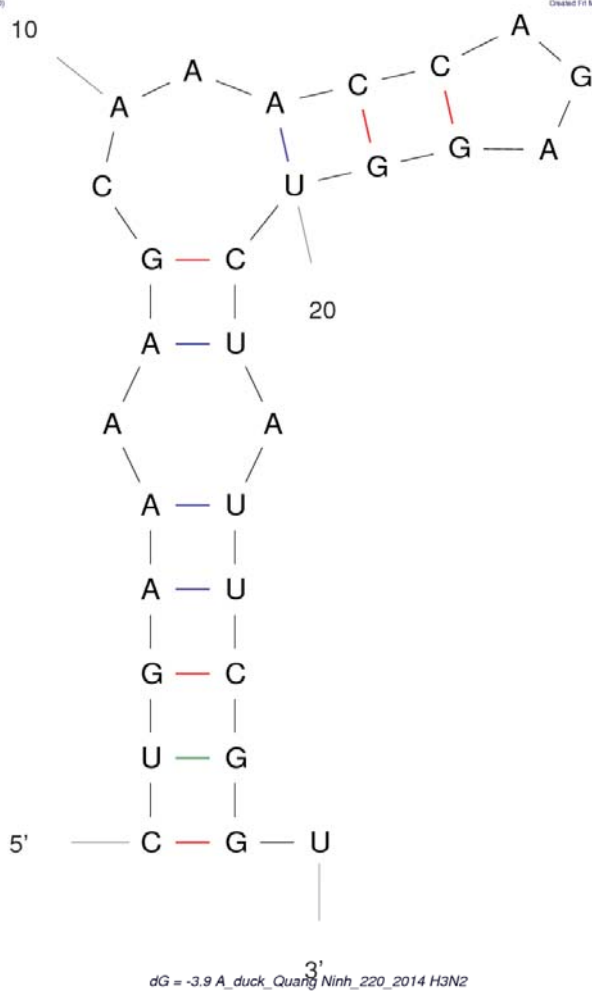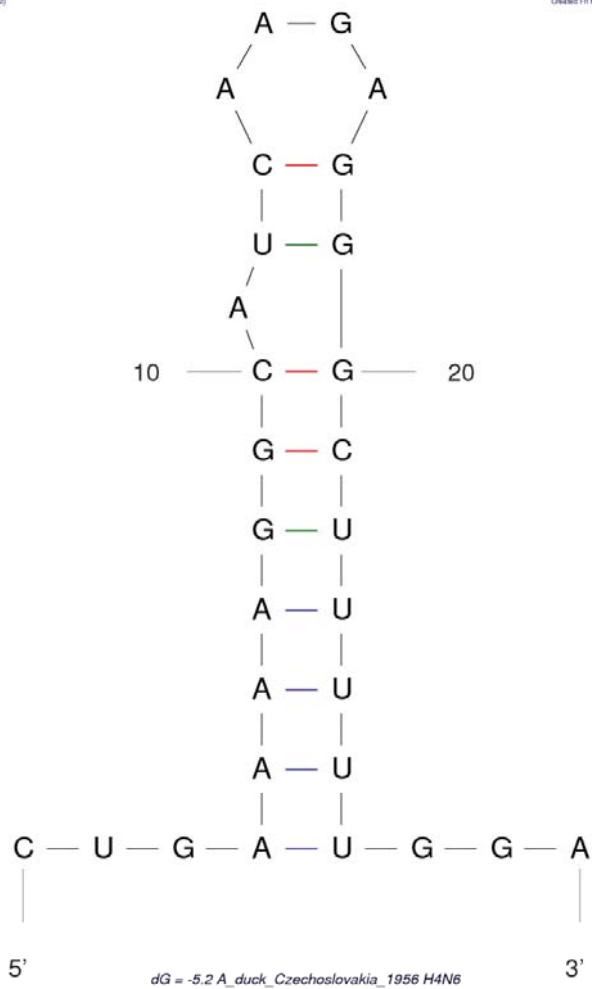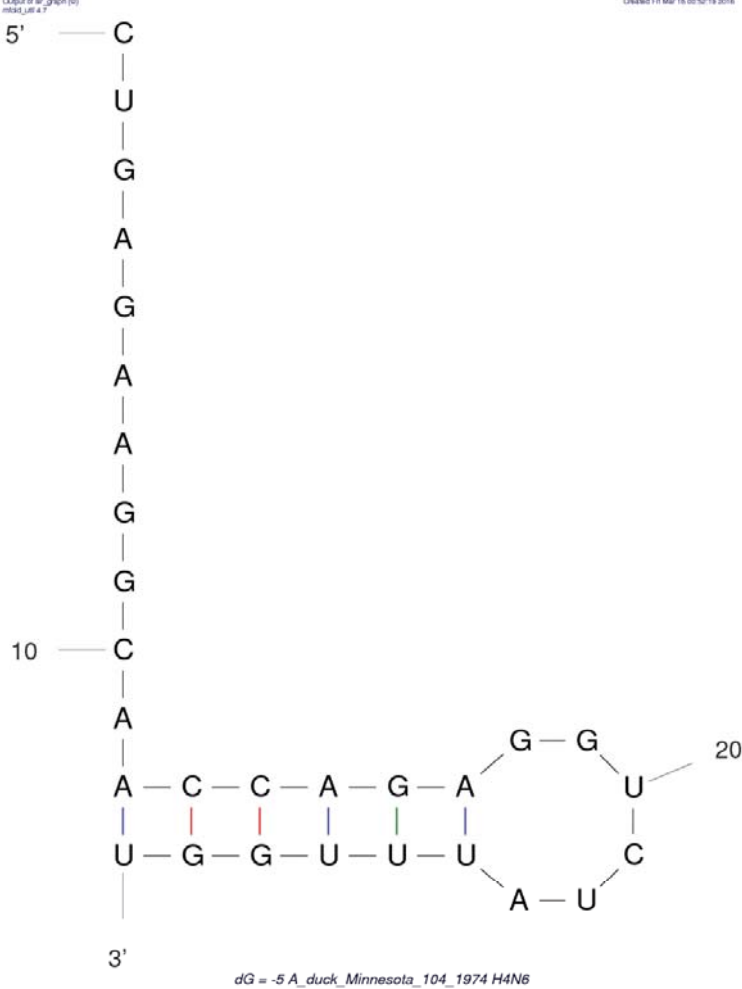

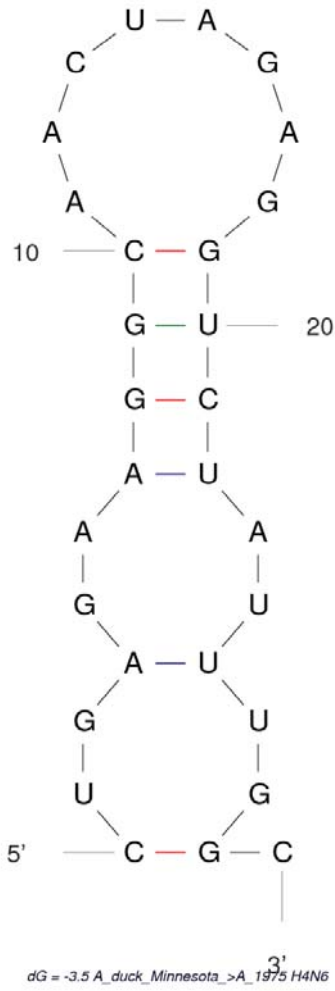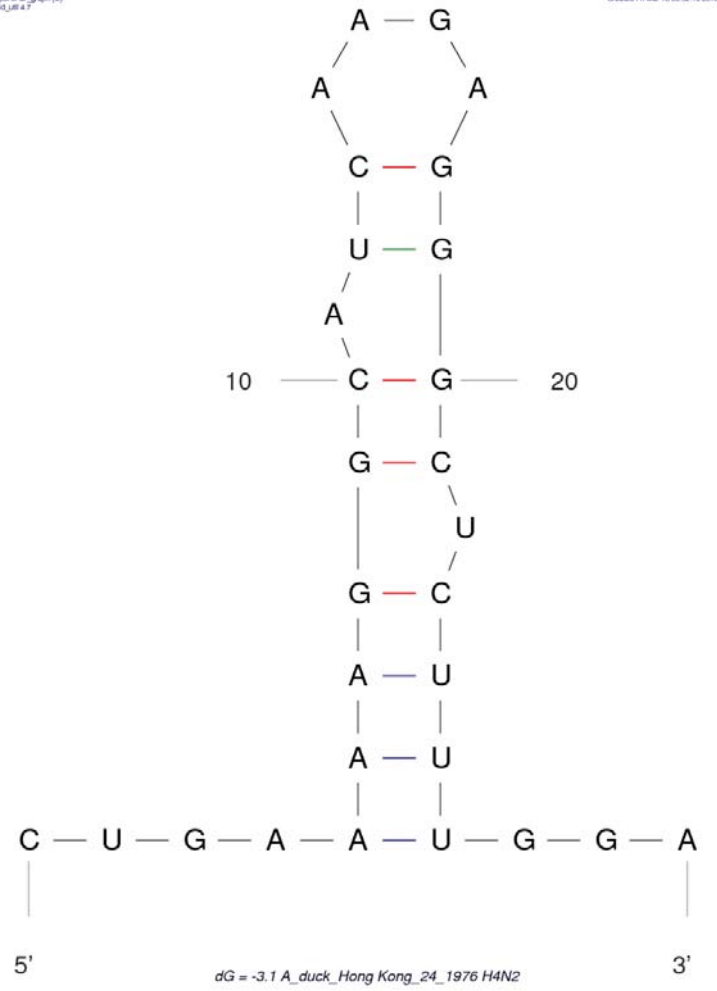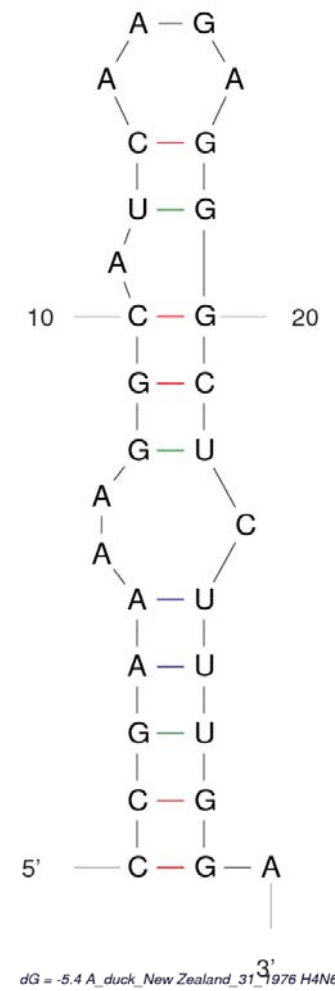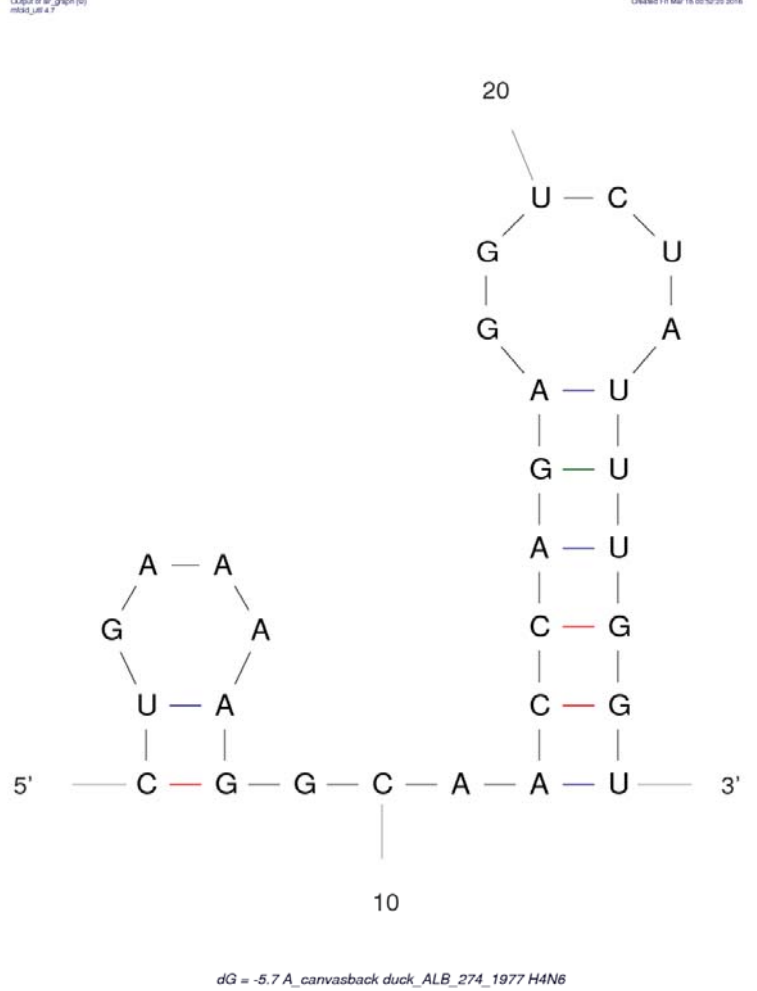

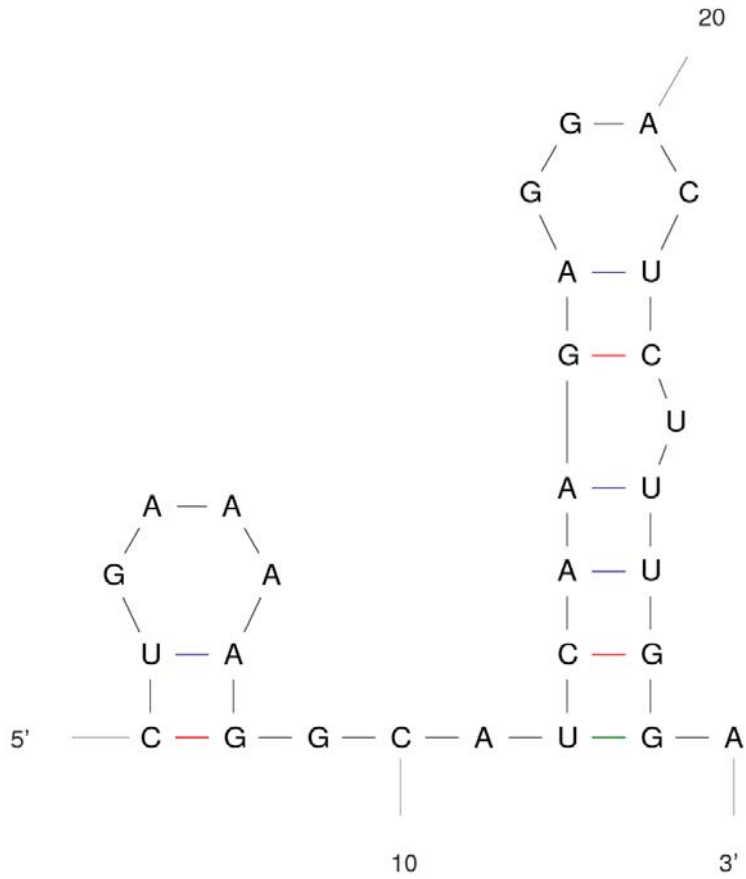

$dG = -1.8$  A\_duck\_Hong Kong\_438\_1977 H4N8

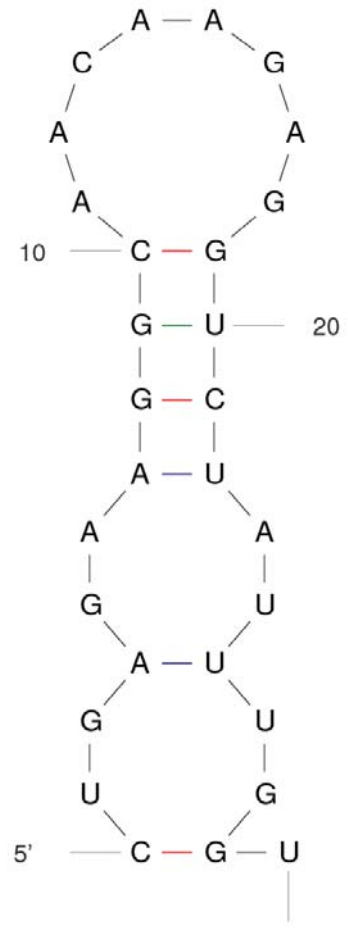

$dG = -3.7$  A\_mallard duck\_Alberta\_291\_1977 H4N1

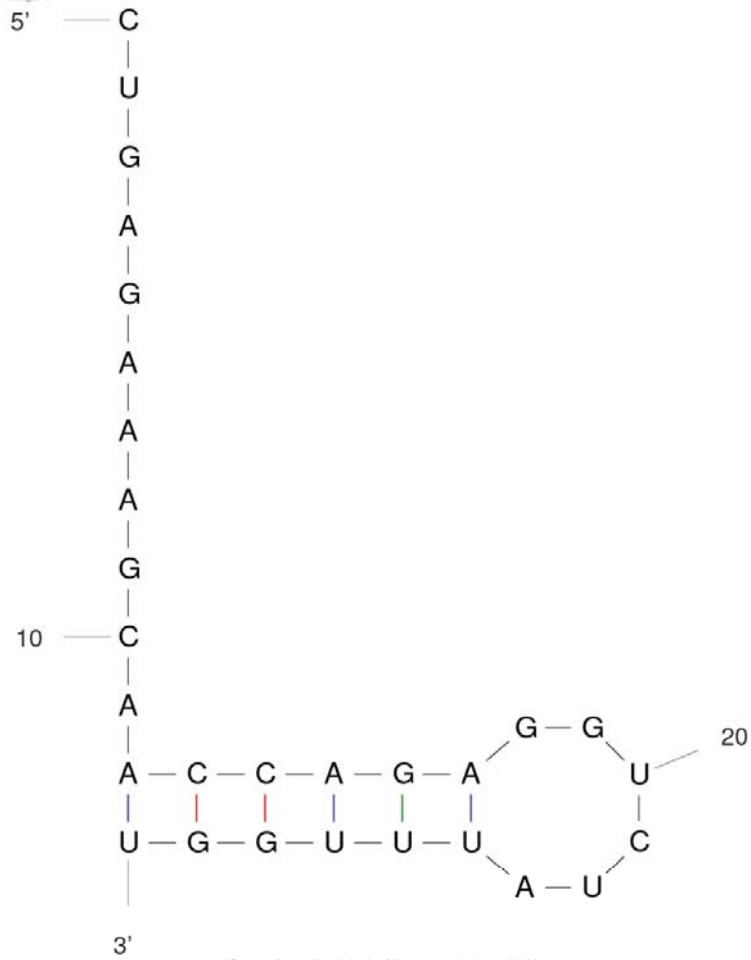

$dG = -5$  A\_mallard duck\_Alberta\_354\_1978 H4N2

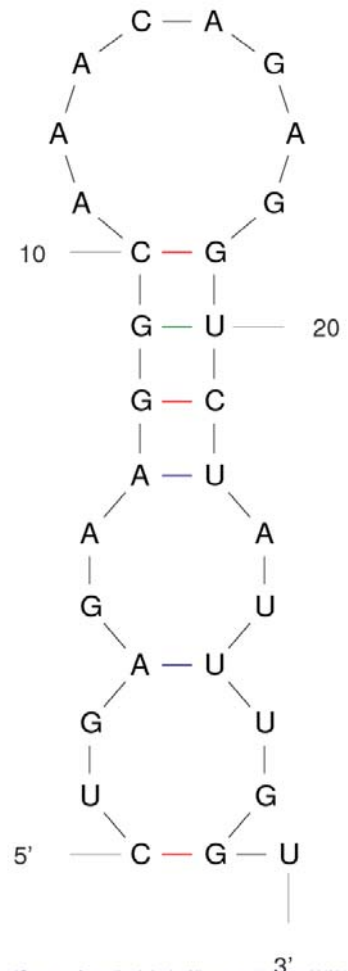

$dG = -3.7$  A\_mallard duck\_Alberta\_581\_1983 H4N4

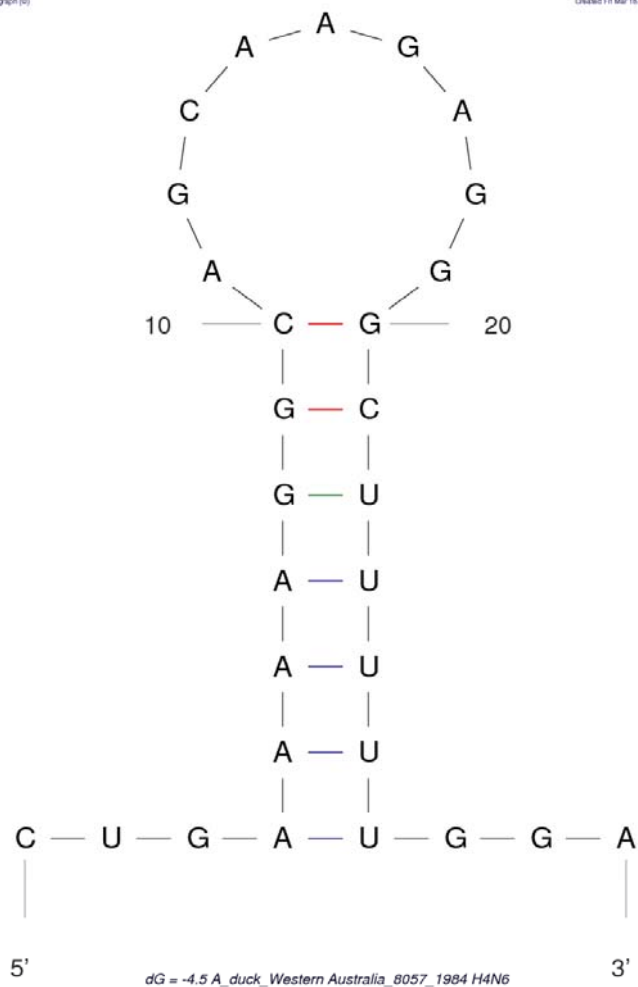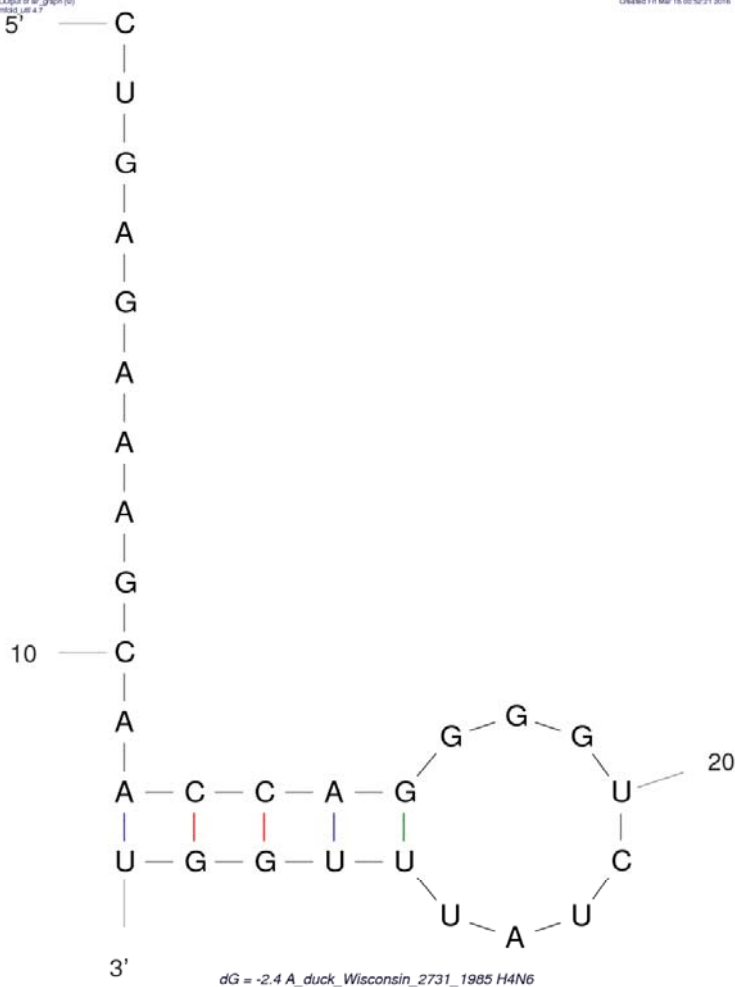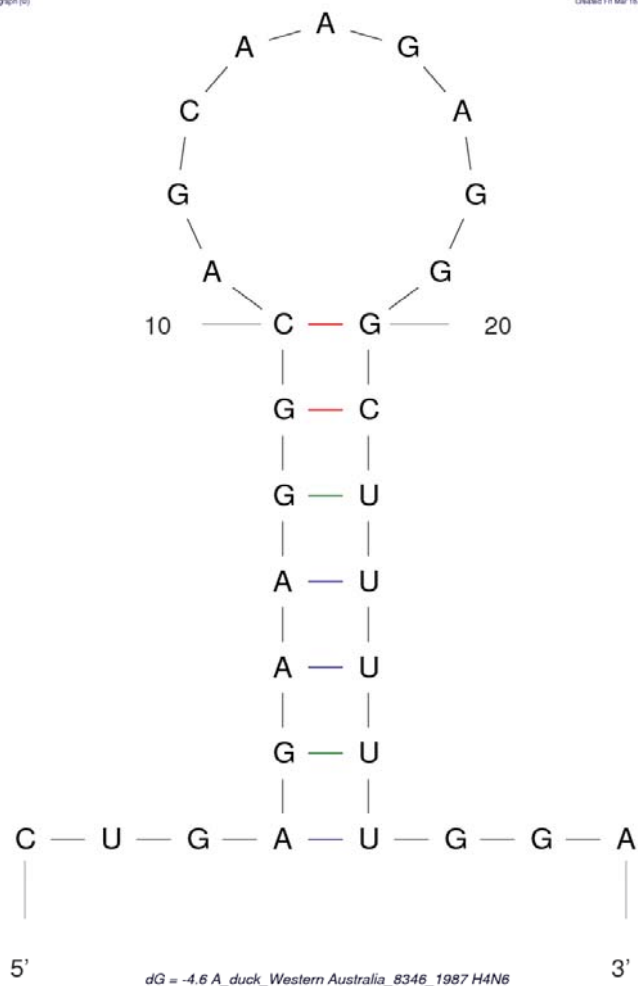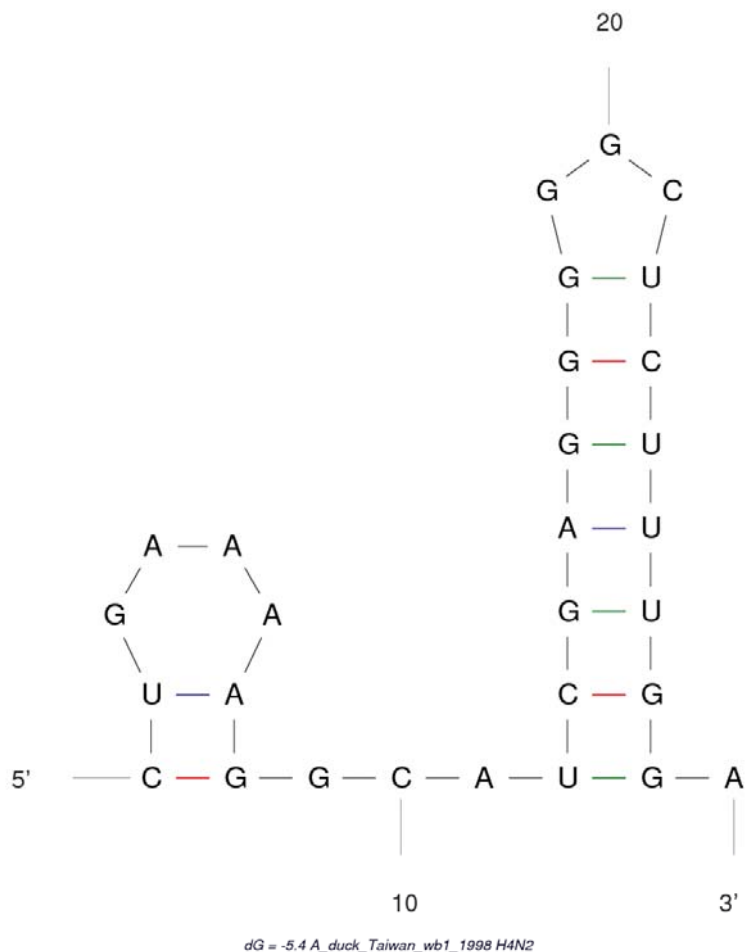



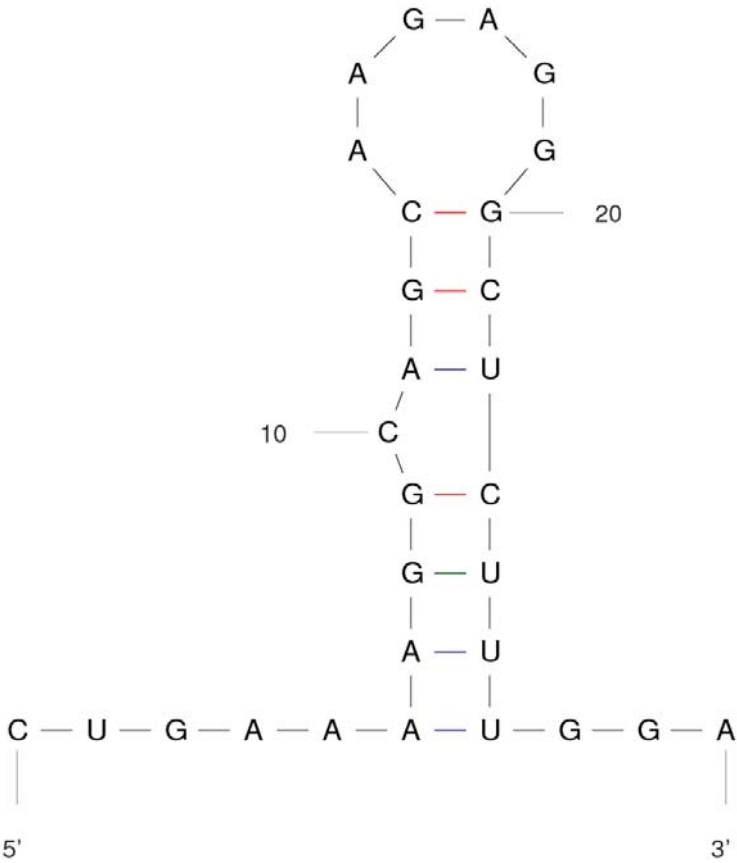

dG = -4.3 A\_duck\_Taiwan\_wb14\_1998 H4N6

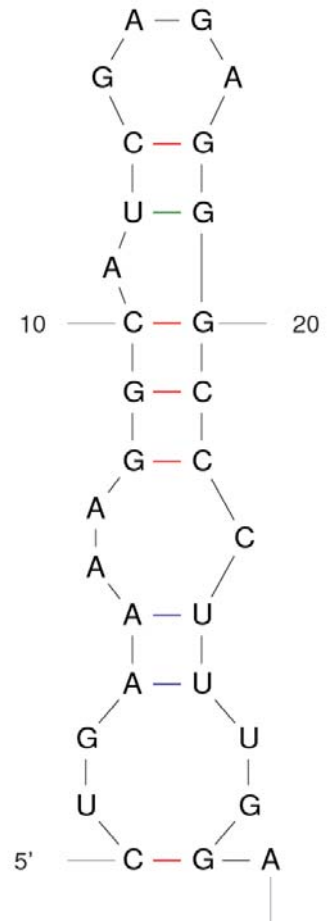

dG = -7.5 A\_duck\_Taiwan\_wb29\_1998 H4N8

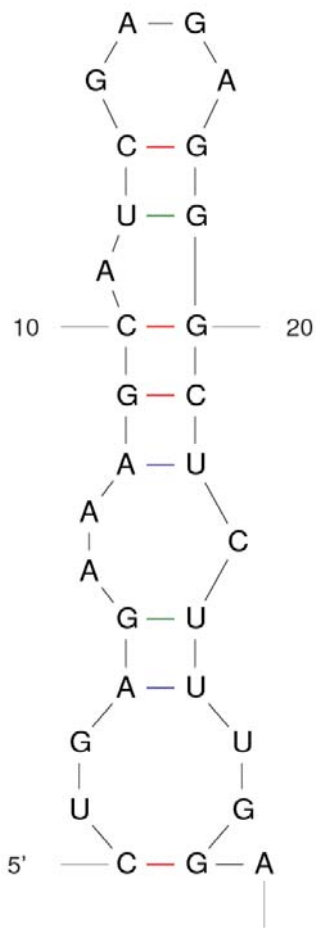

dG = -5.3 A\_duck\_Taiwan\_wb45\_1998 H4N7

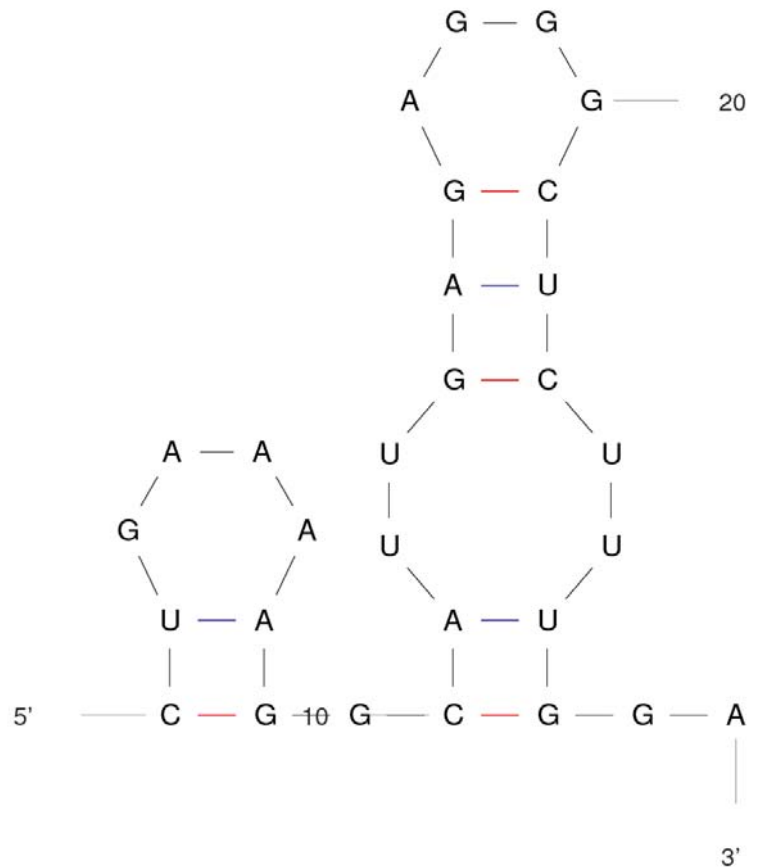

dG = -4.2 A\_duck\_Hokkaido\_1058\_2001 H4N5

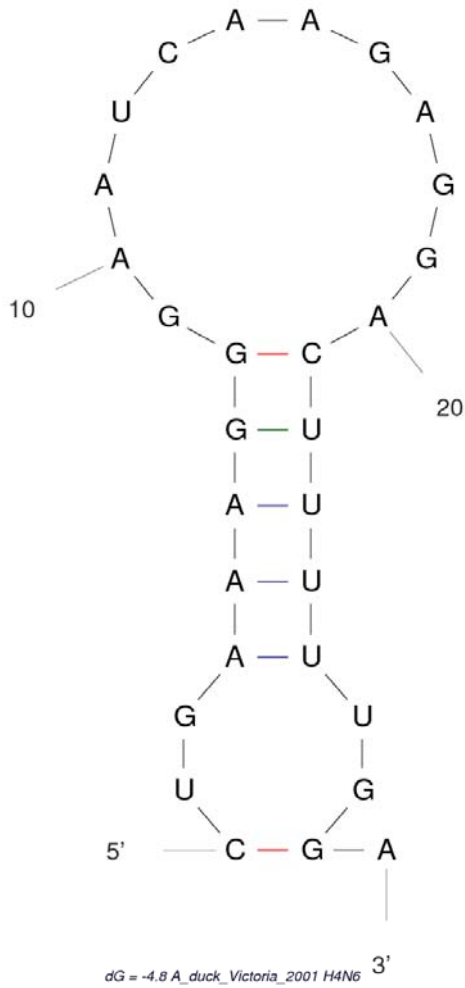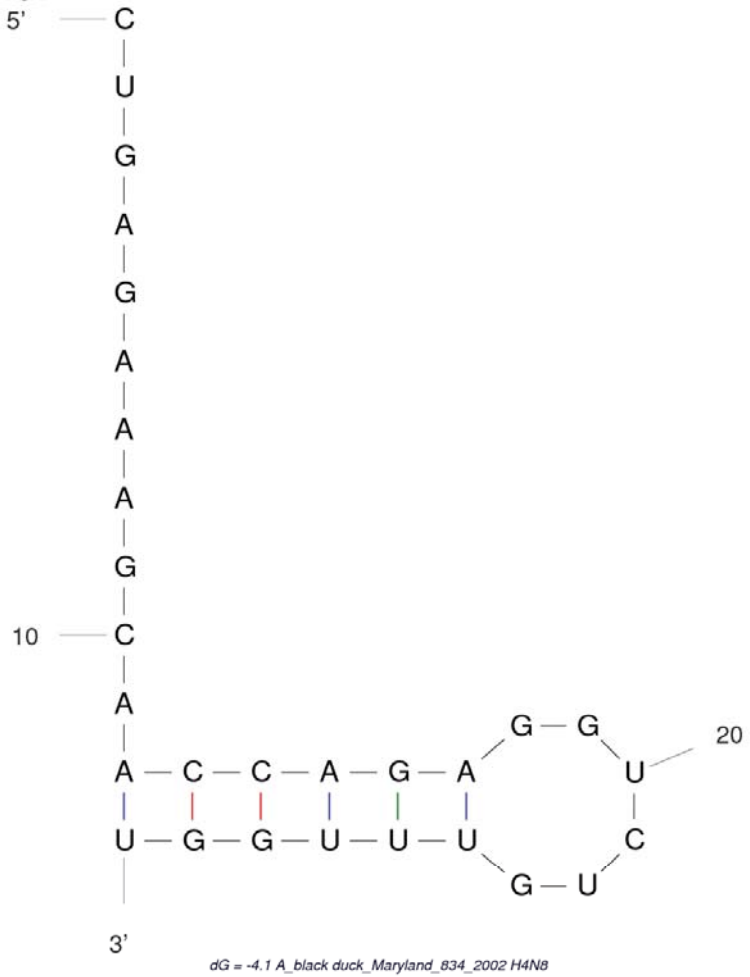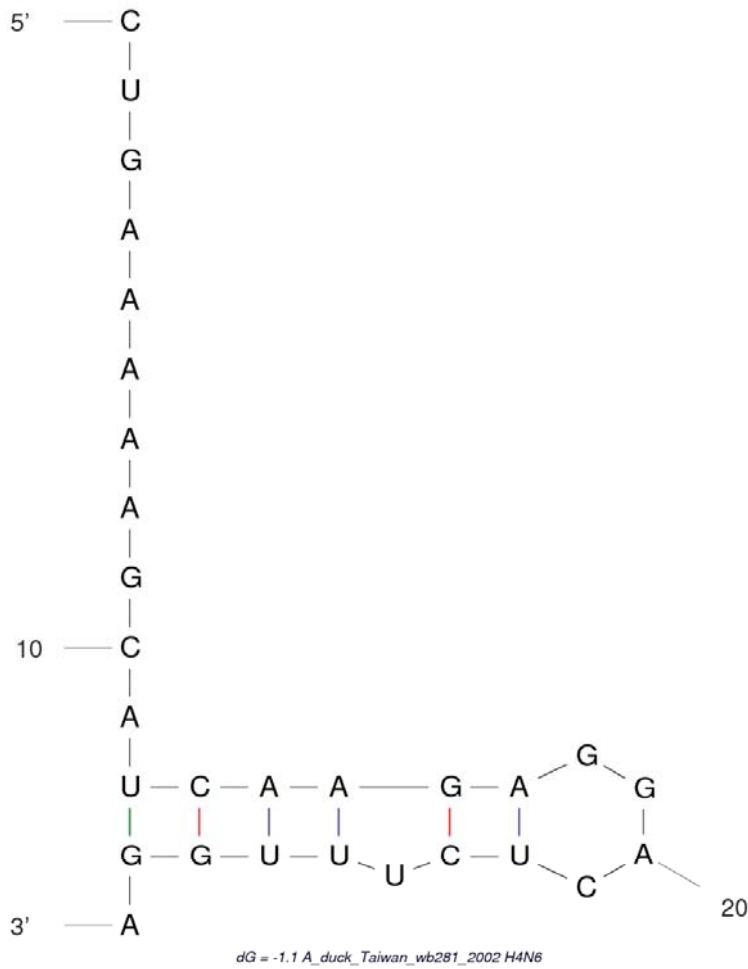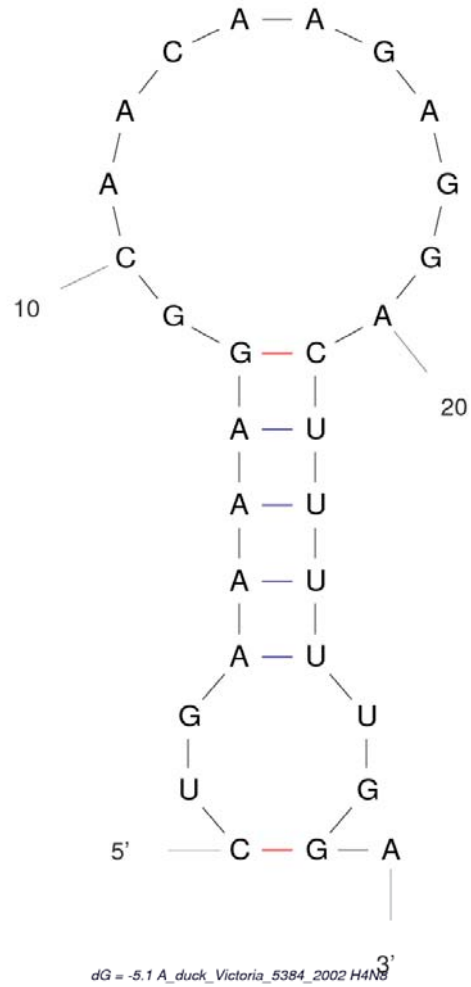

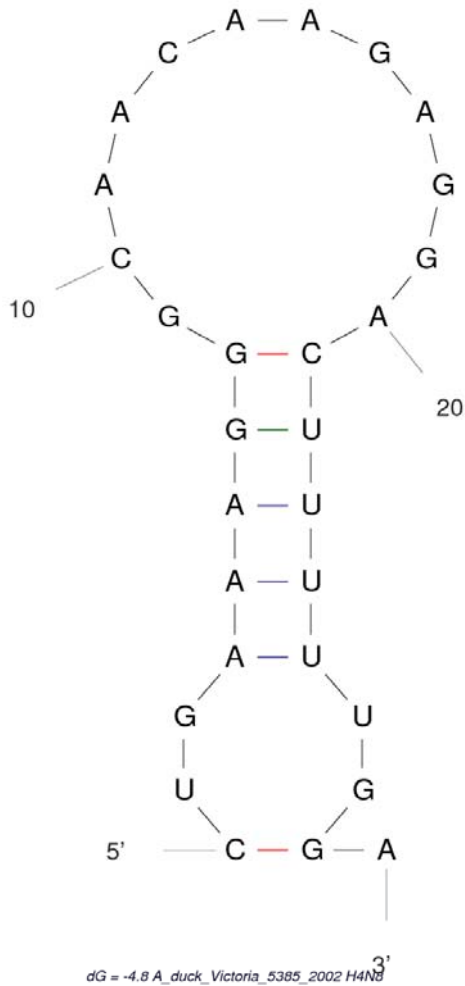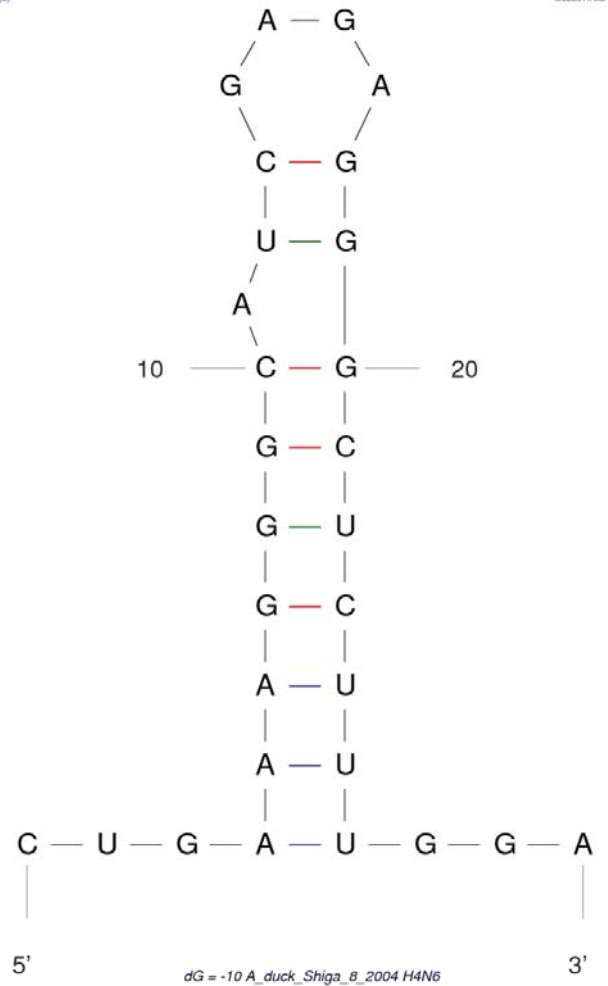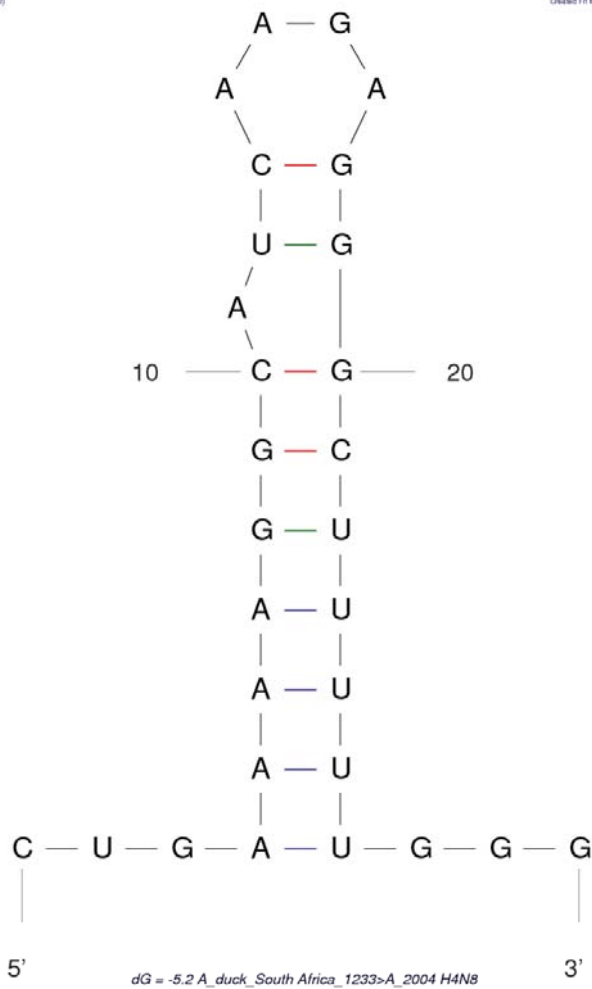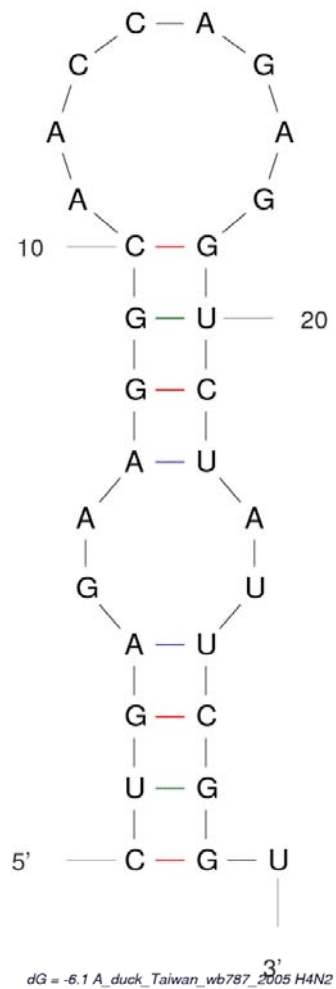

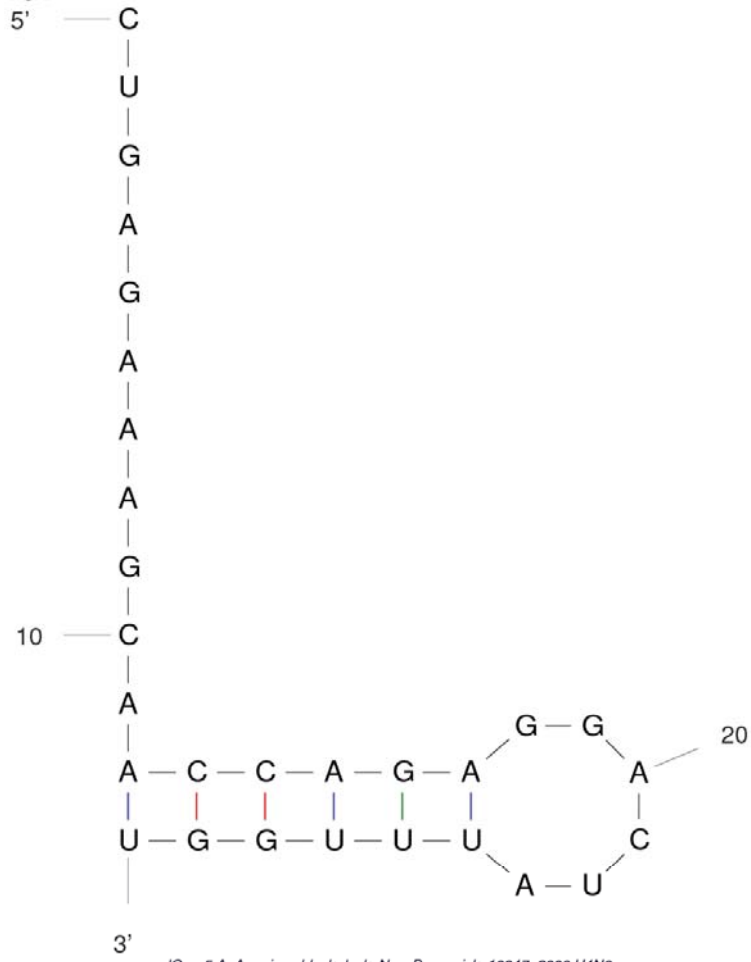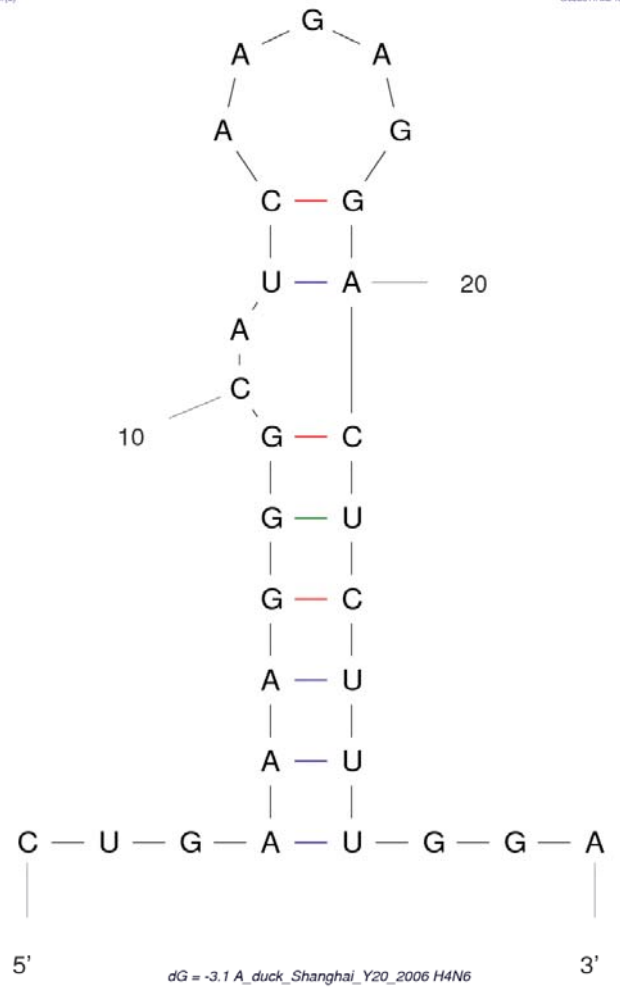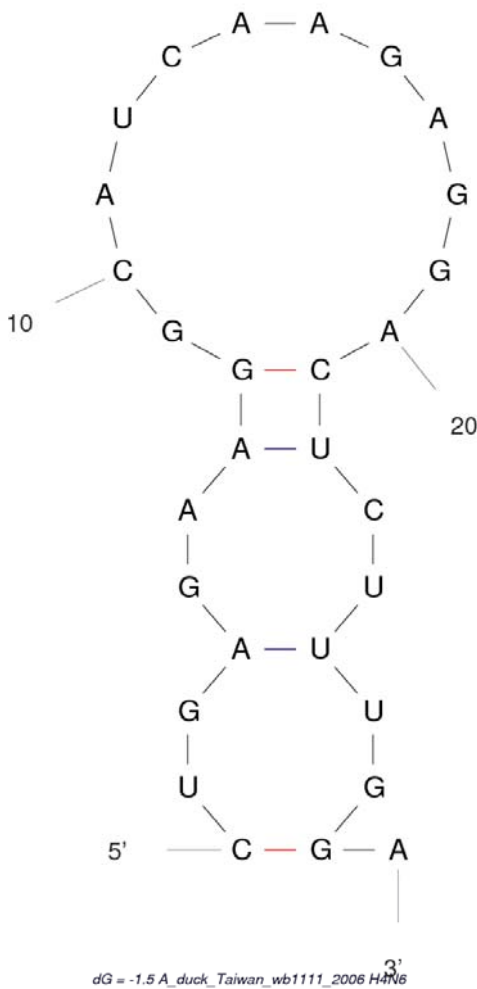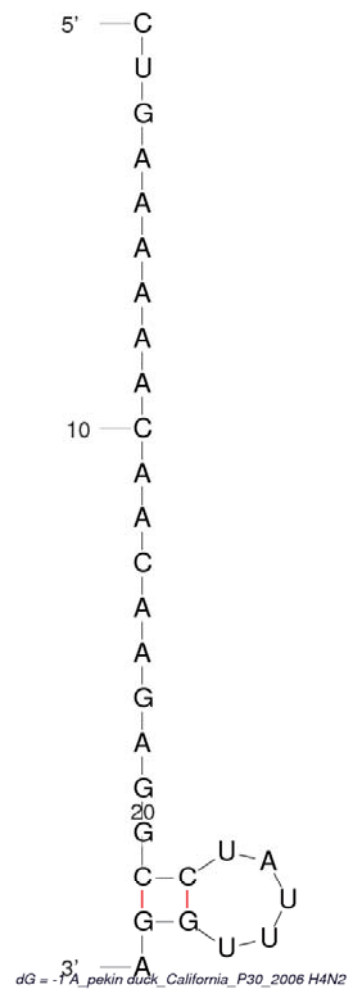

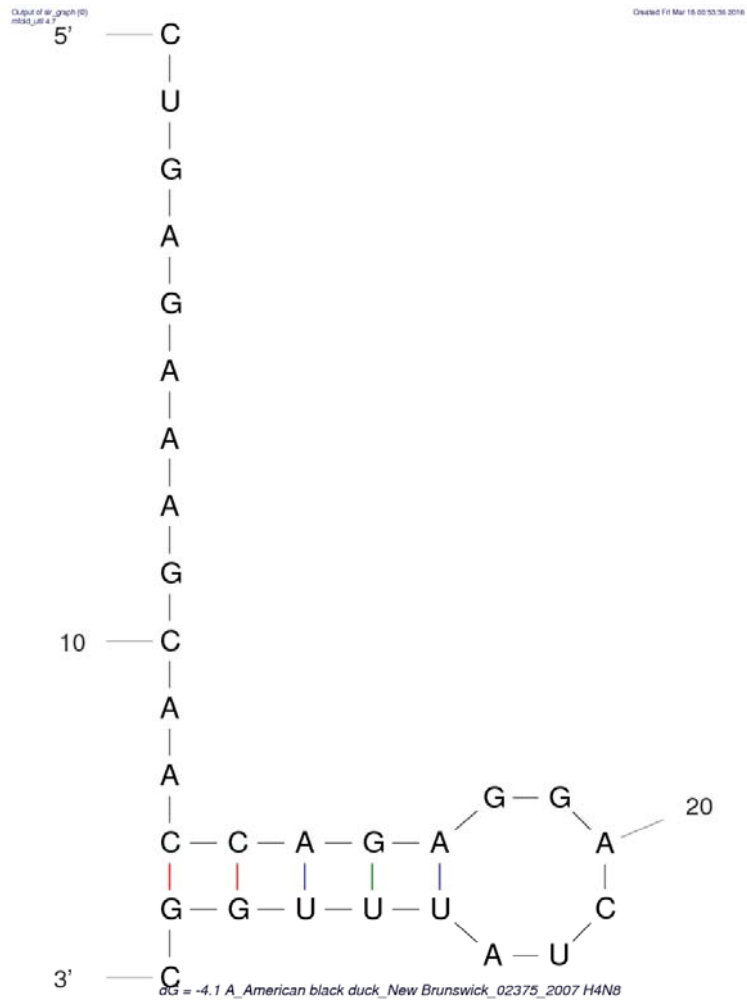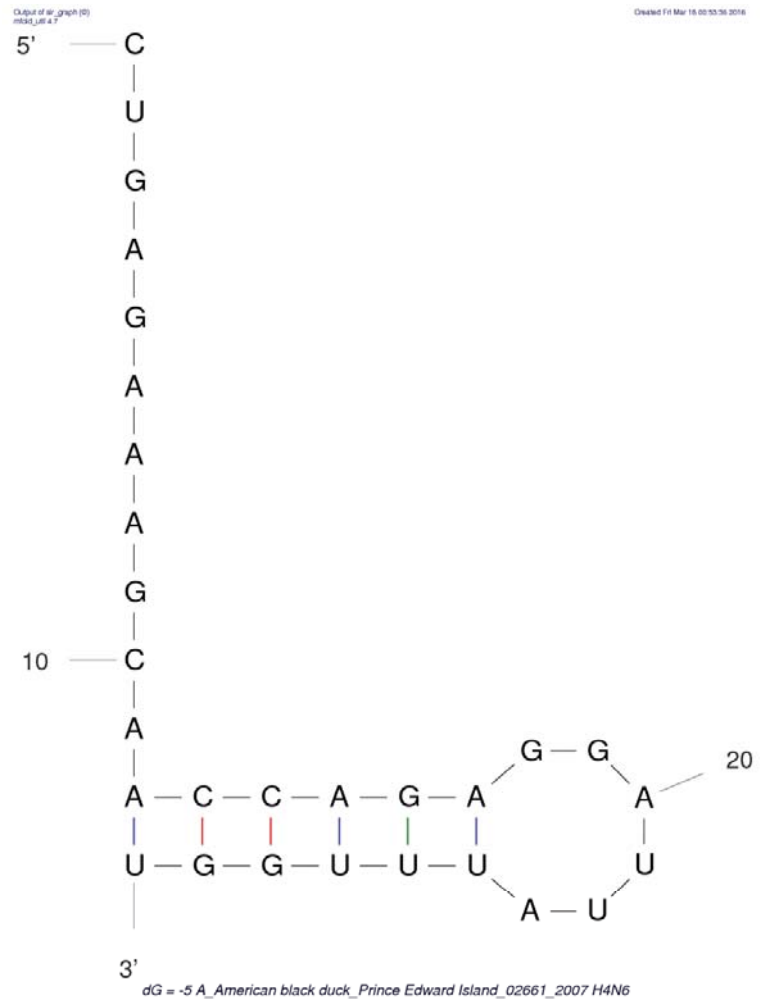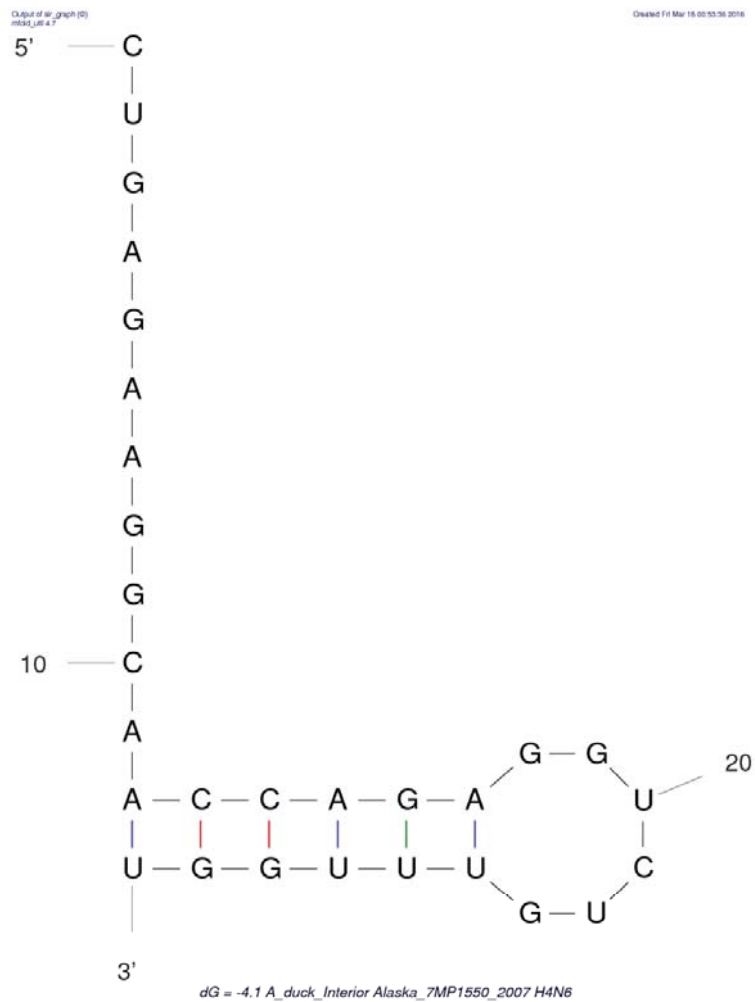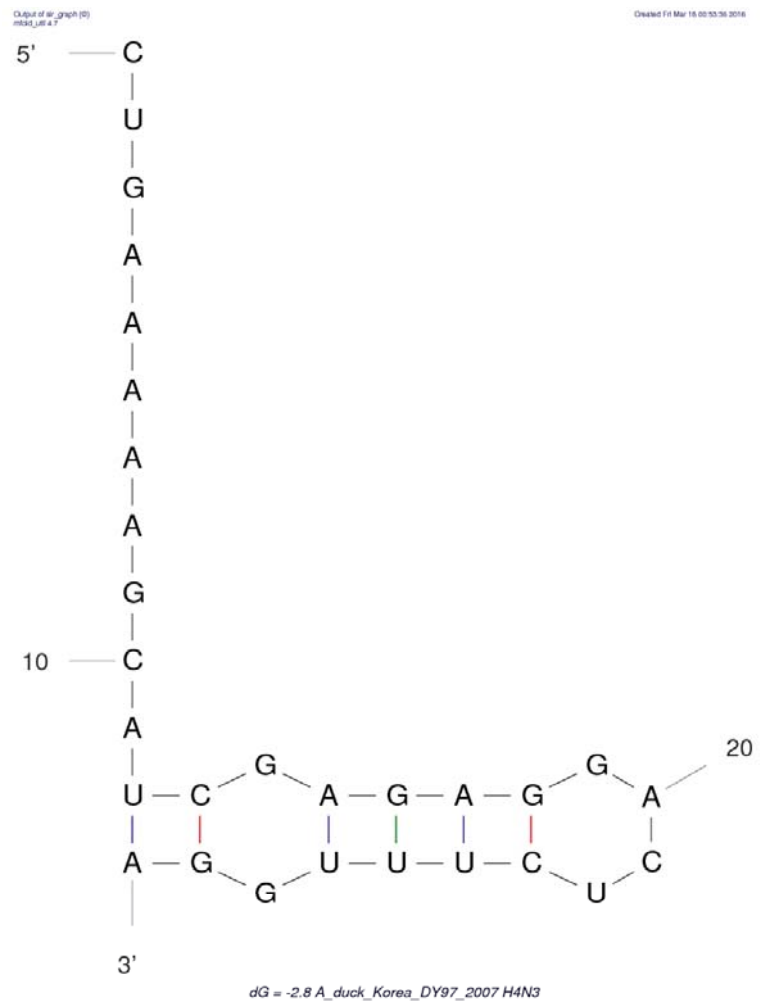

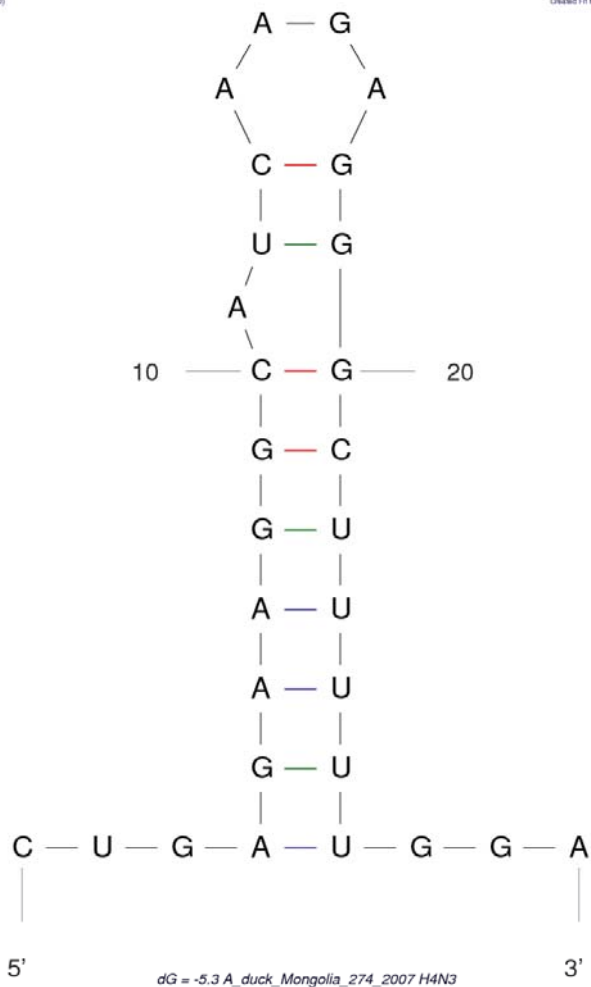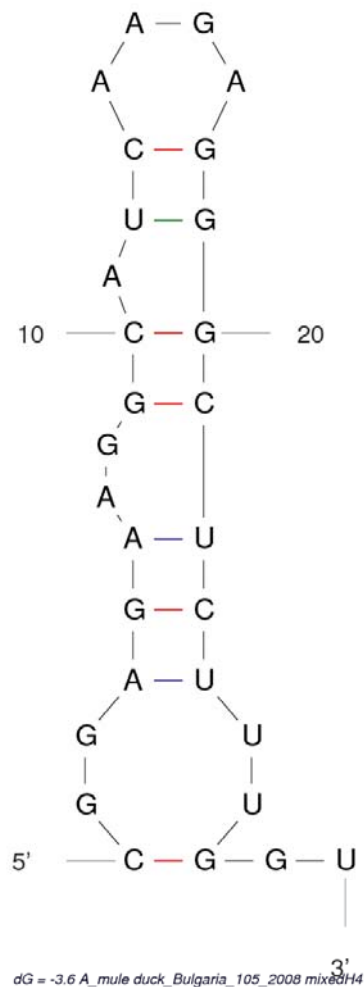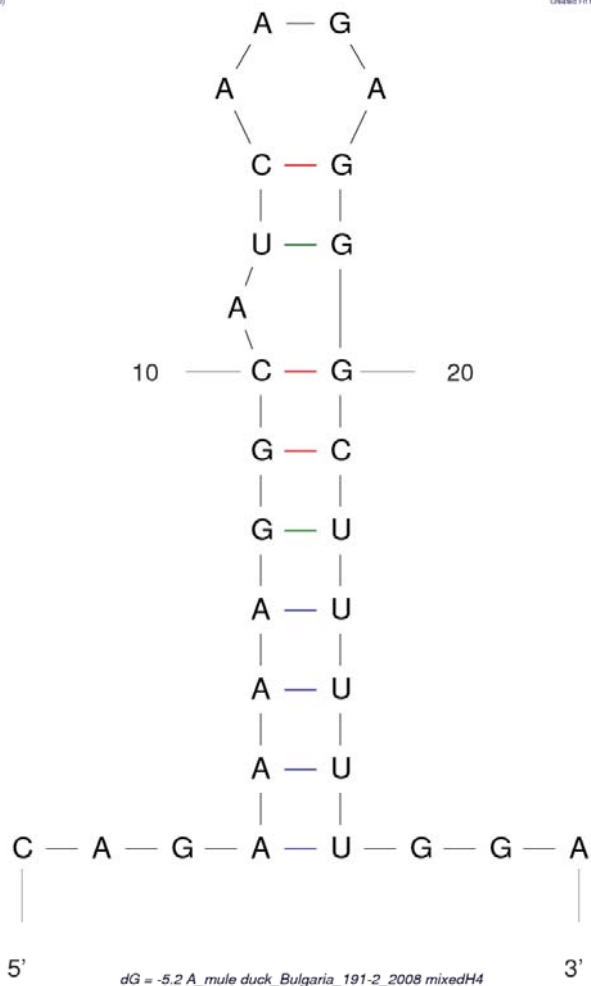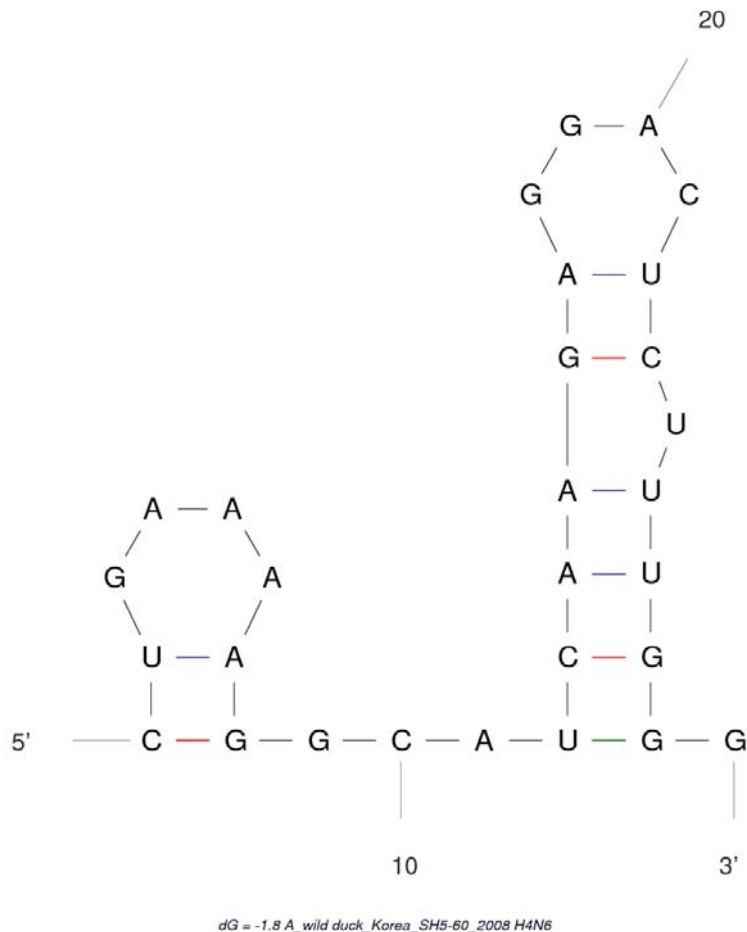

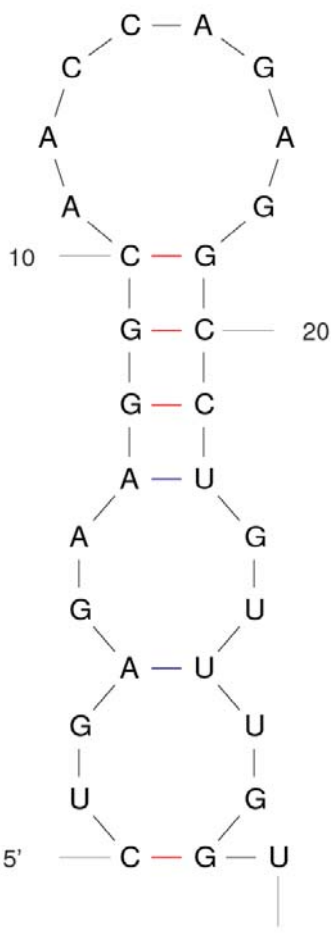

dG = -6.6 A\_American black duck\_New Brunswick\_03511\_2009 H4N6

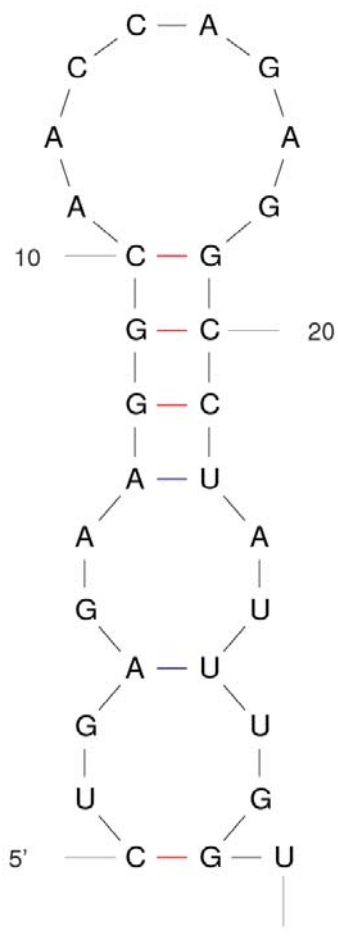

dG = -6.4 A\_American black duck\_New Brunswick\_03530\_2009 H4N6

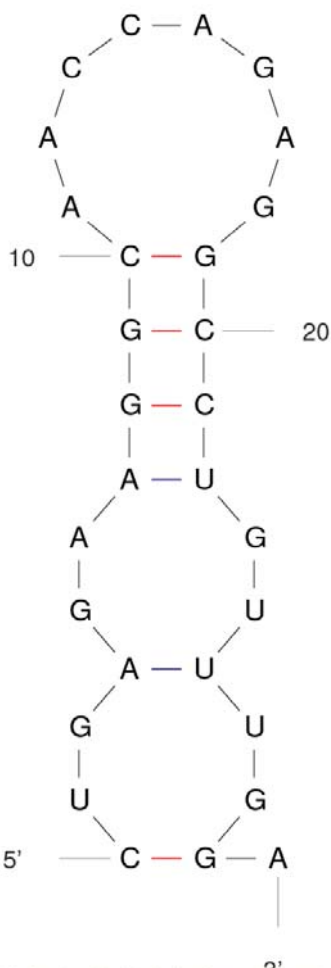

dG = -7.1 A\_American black duck\_New Brunswick\_03554\_2009 H4N6

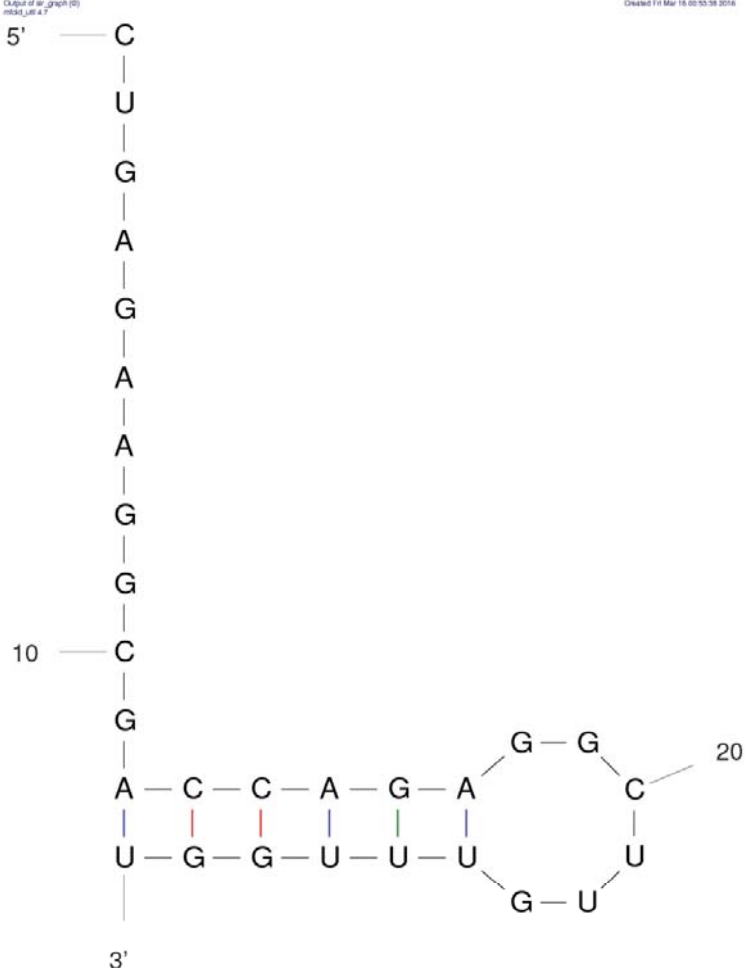

dG = -4.2 A\_American black duck\_Wisconsin\_2542\_2009 H4N2

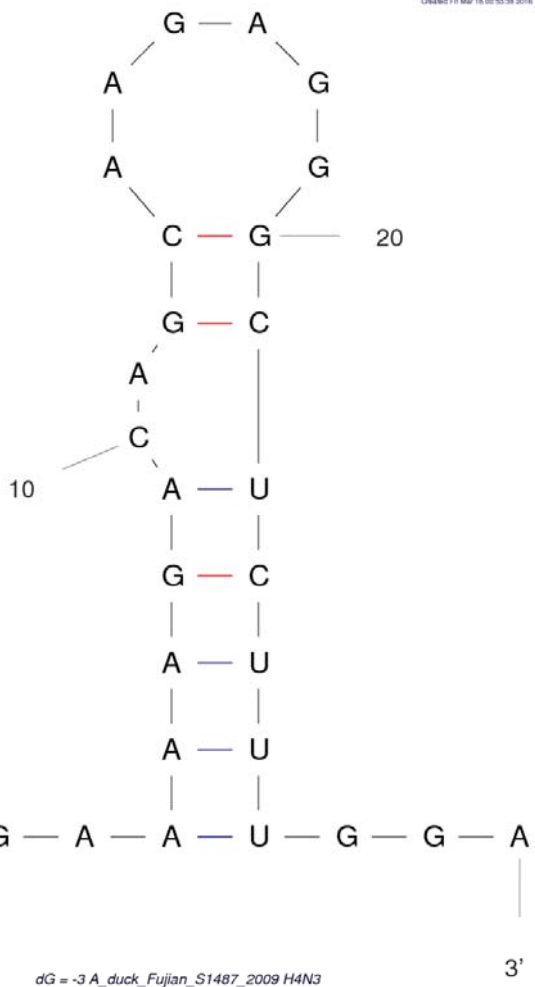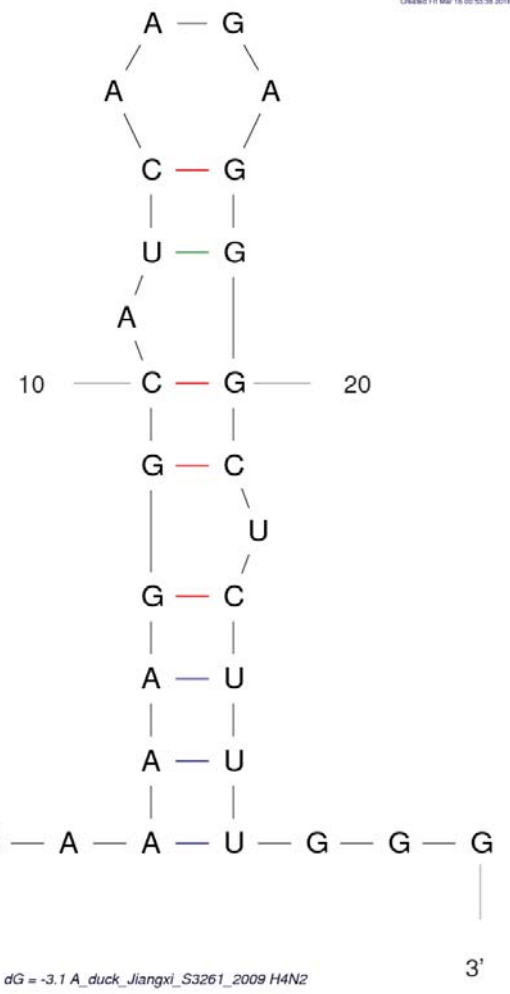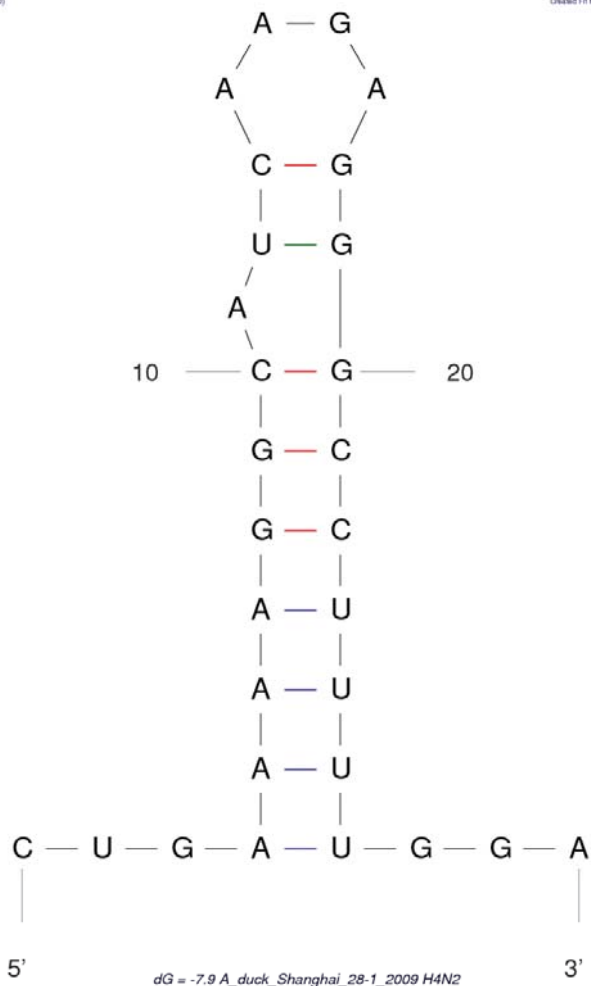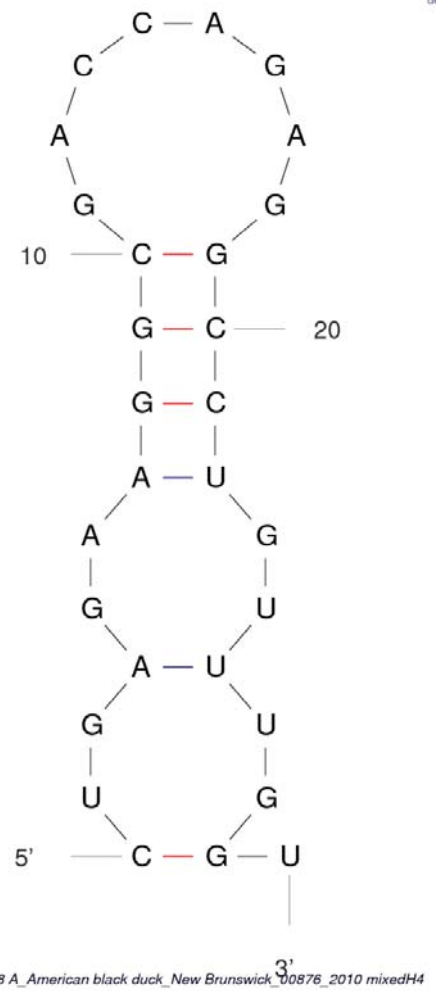



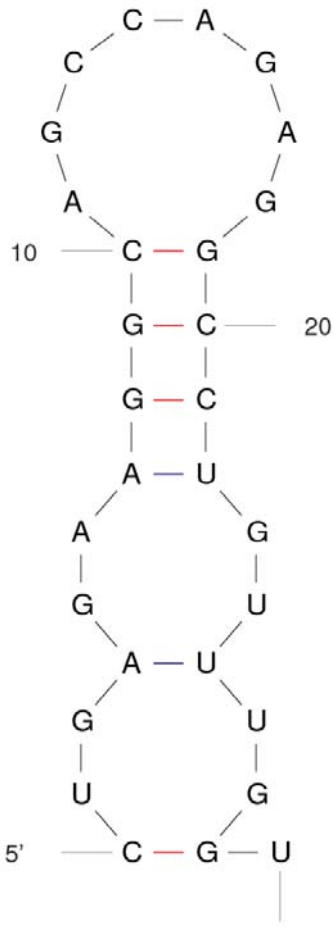

dG = -6.6 A\_American black duck\_New Brunswick\_00949\_2010 H4N6

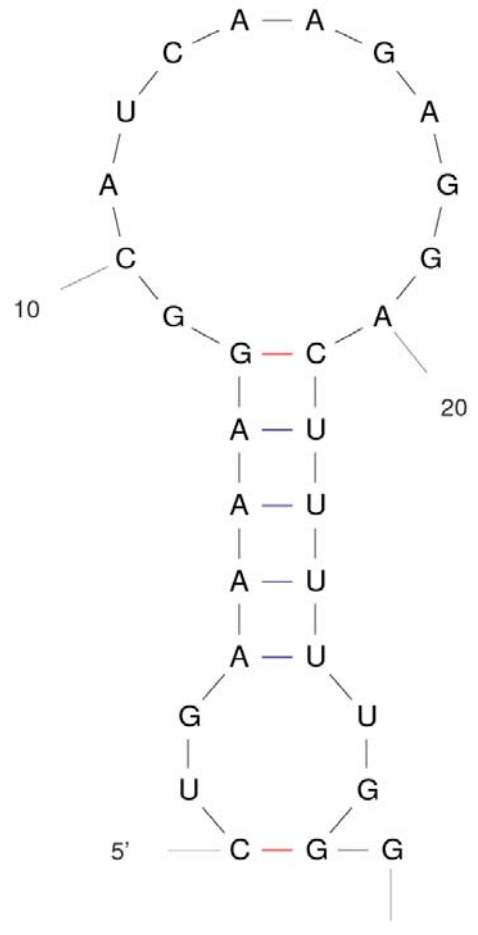

dG = -5.3 A\_duck\_Henan\_S1091\_2010 H4N6

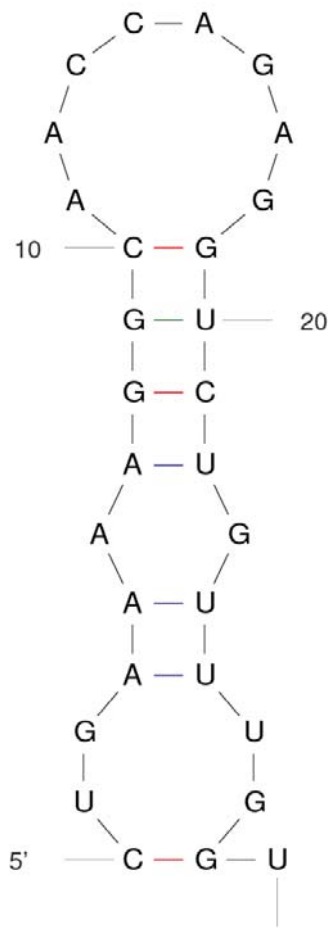

dG = -5.2 A\_ring-necked duck\_Interior Alaska\_10BM05617R0\_2010 H4N6

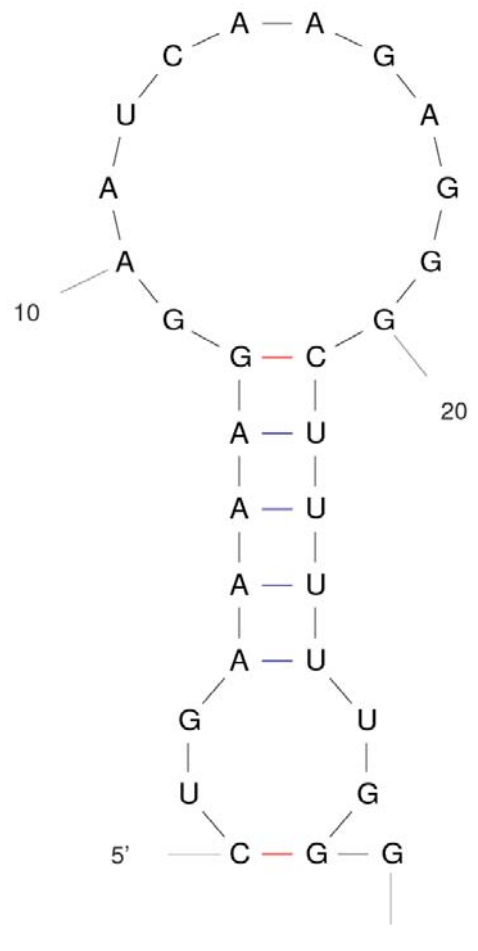

dG = -4.3 A\_duck\_Jiangsu\_S2447\_2011 H4N6

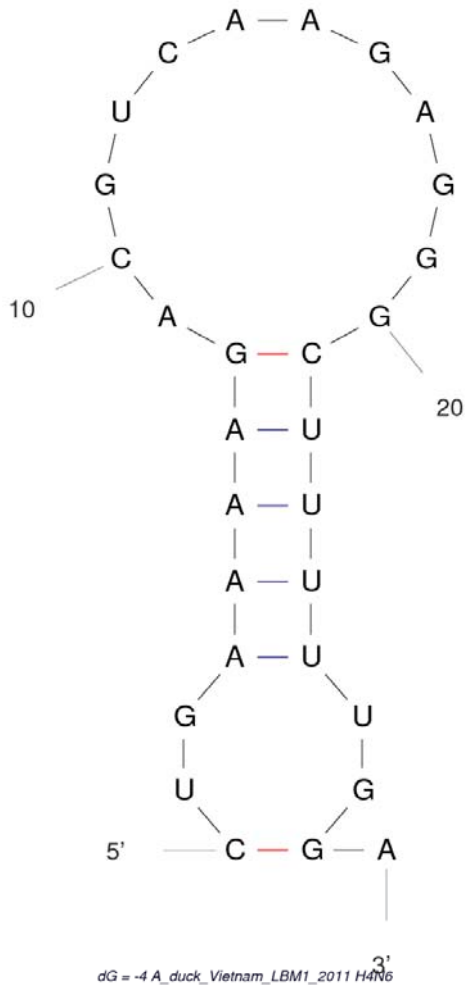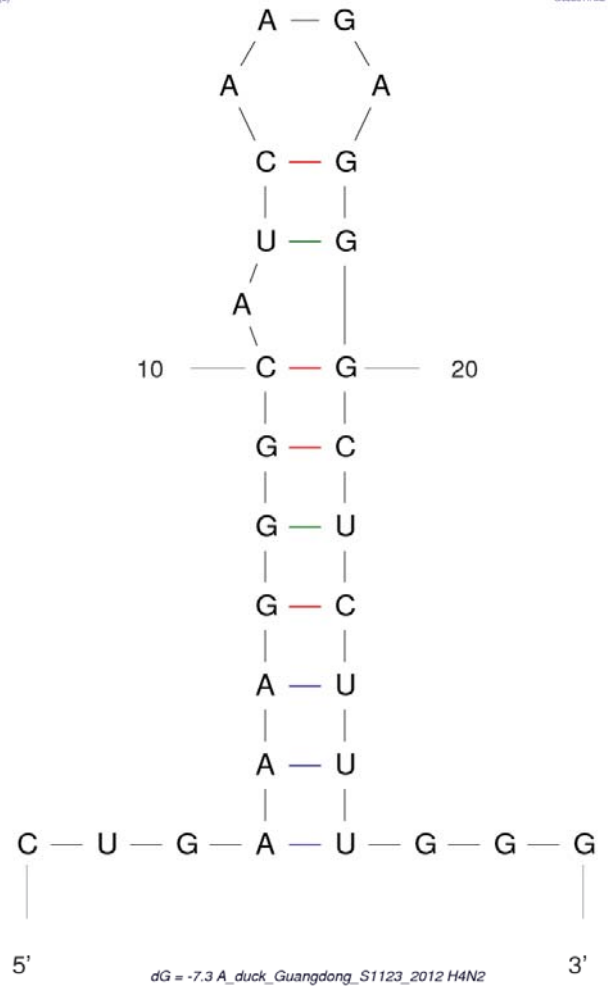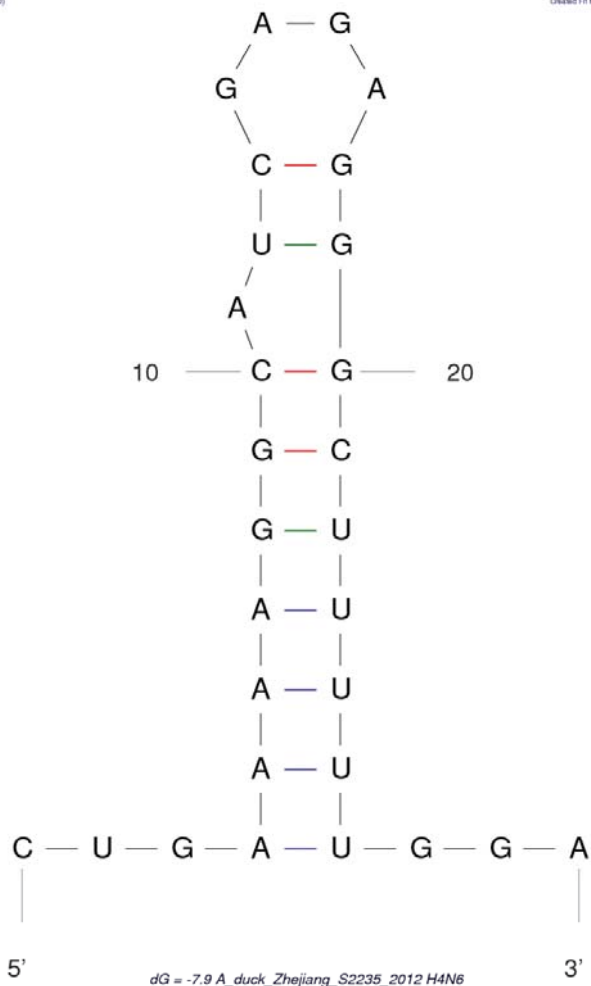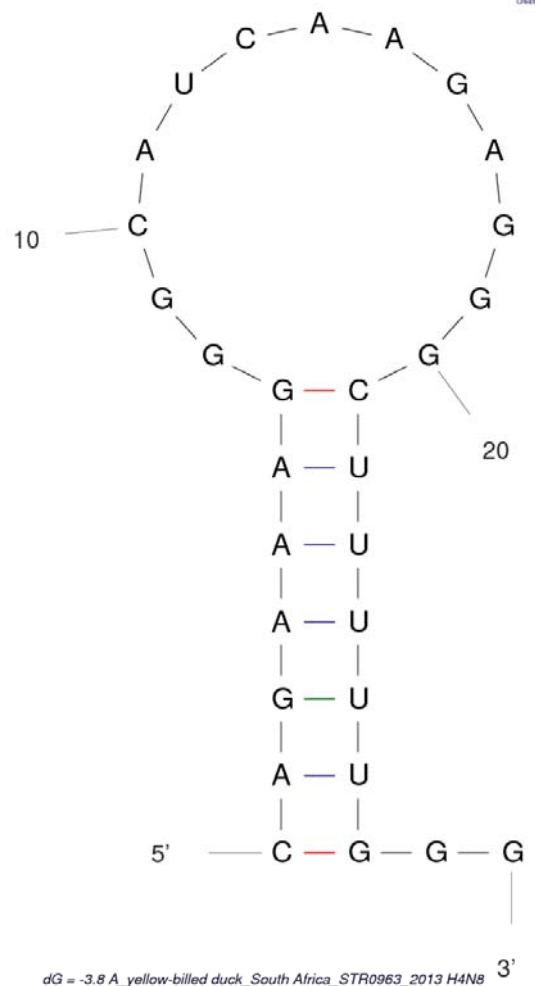

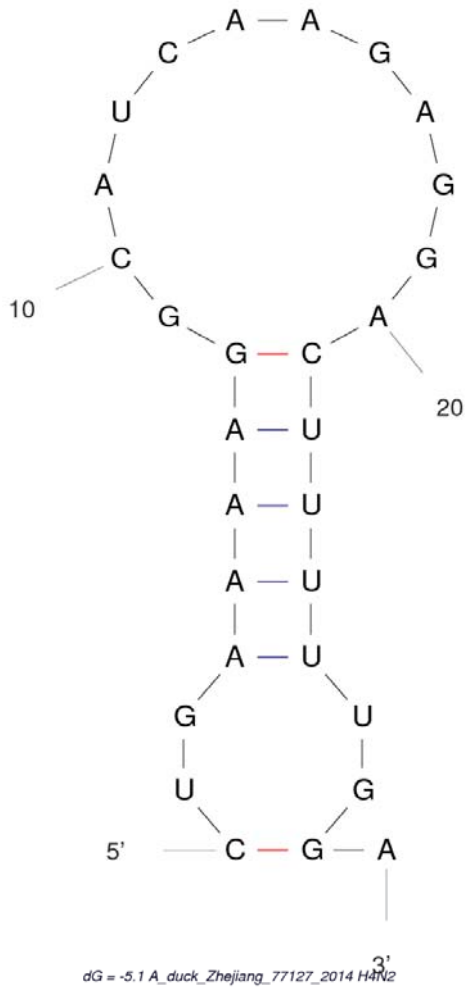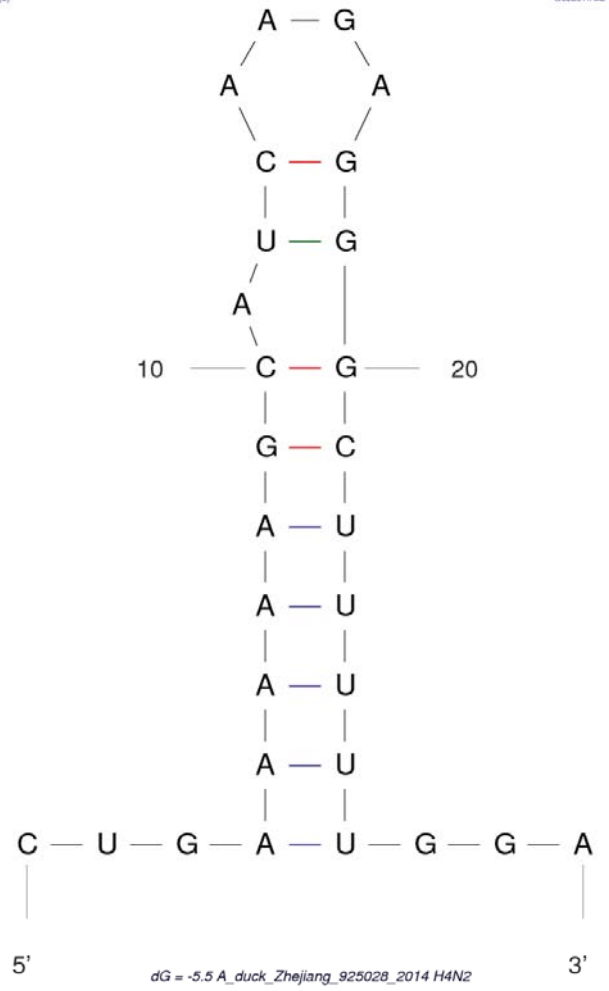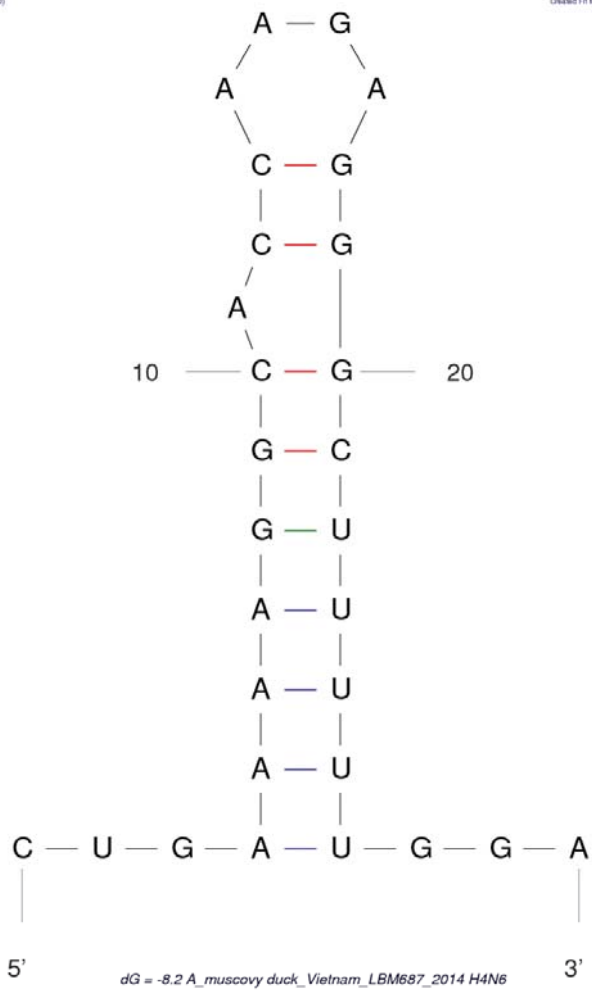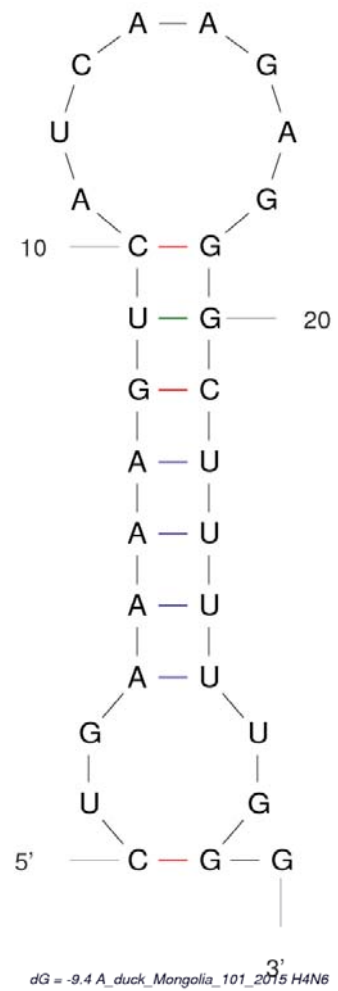

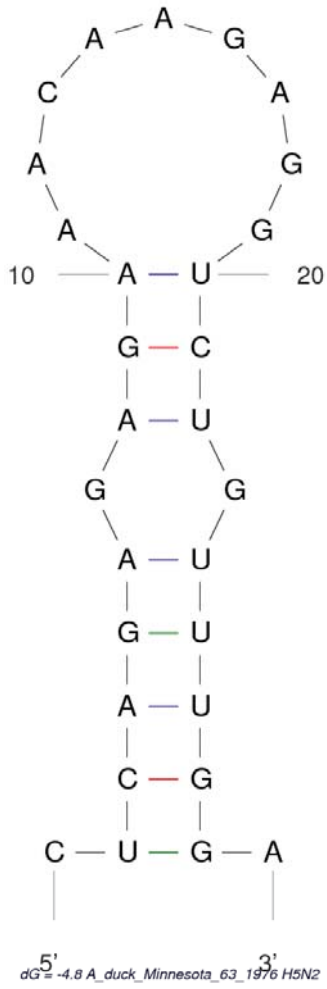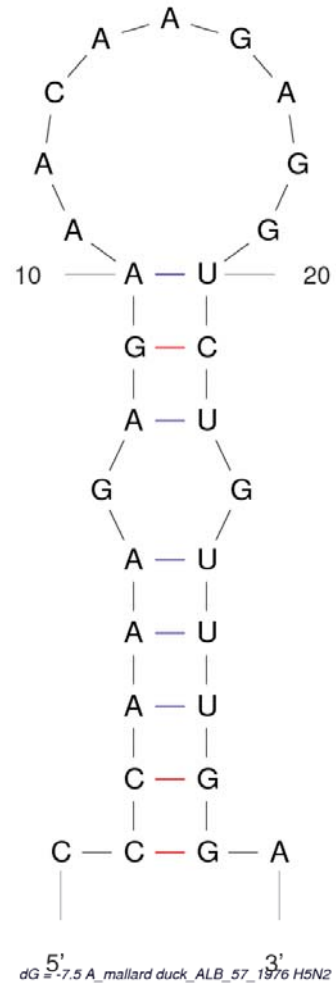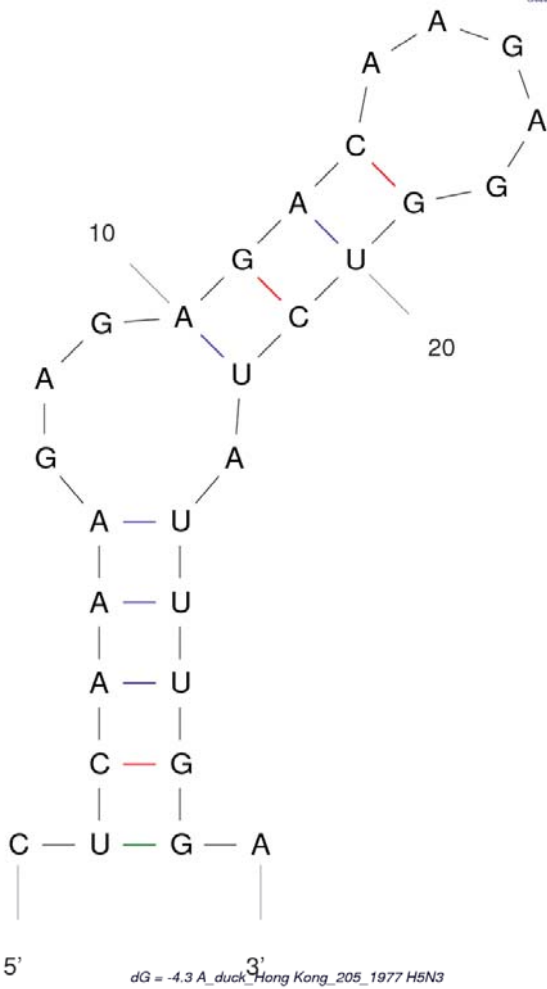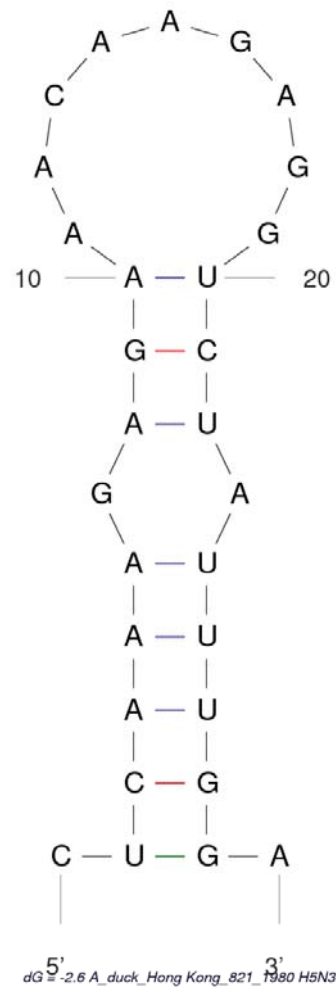

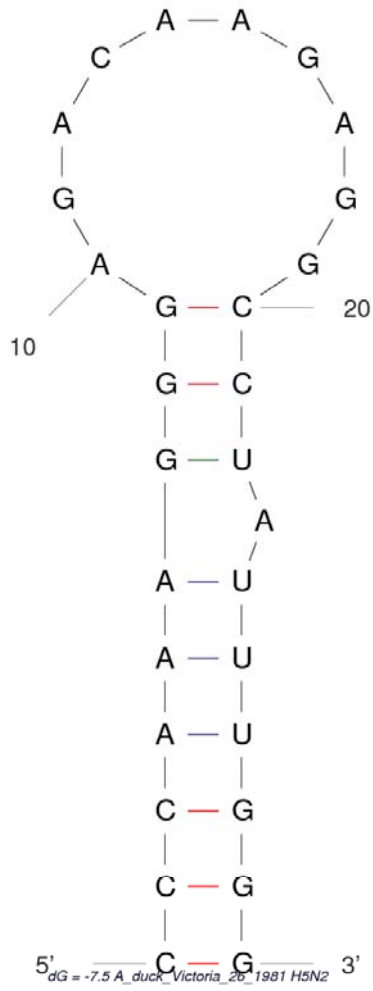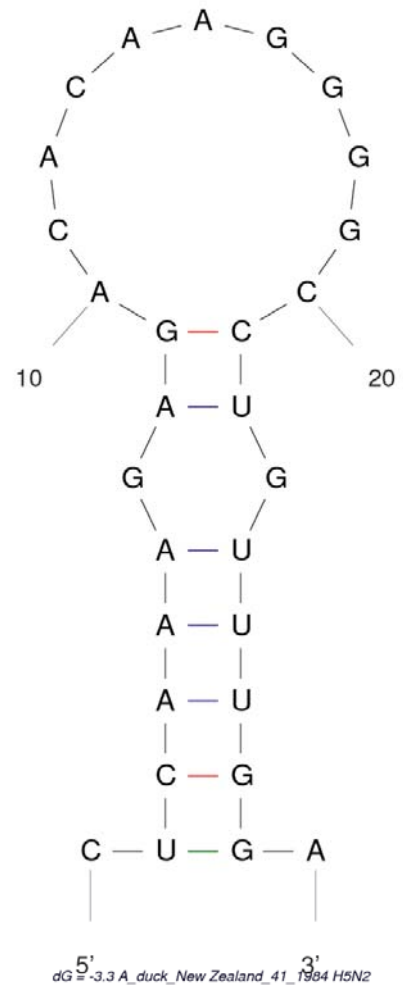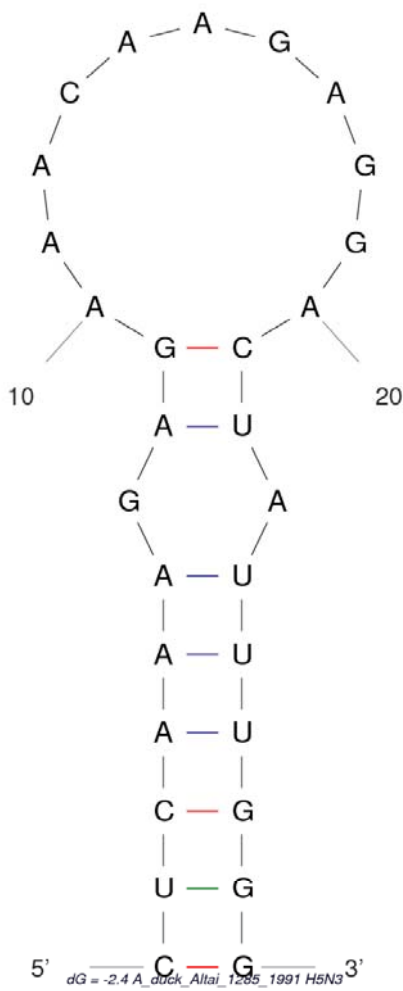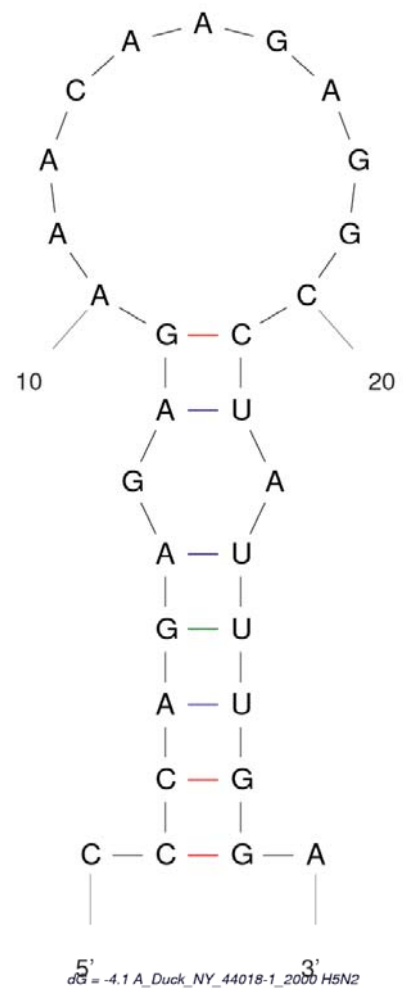

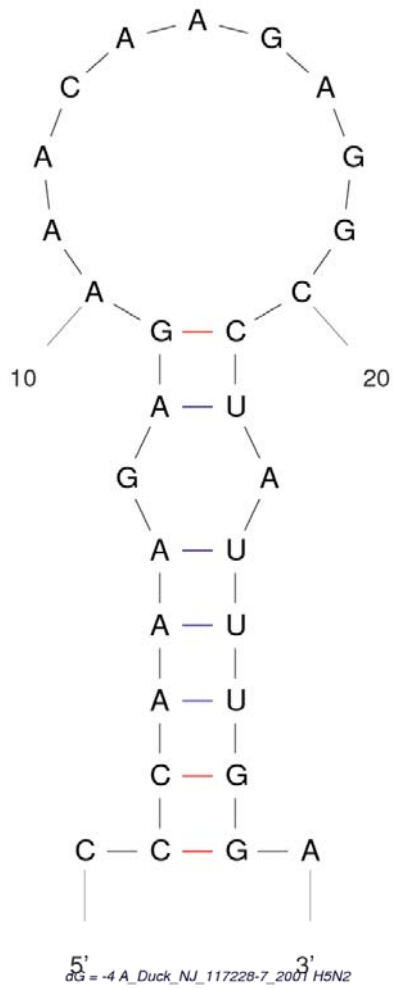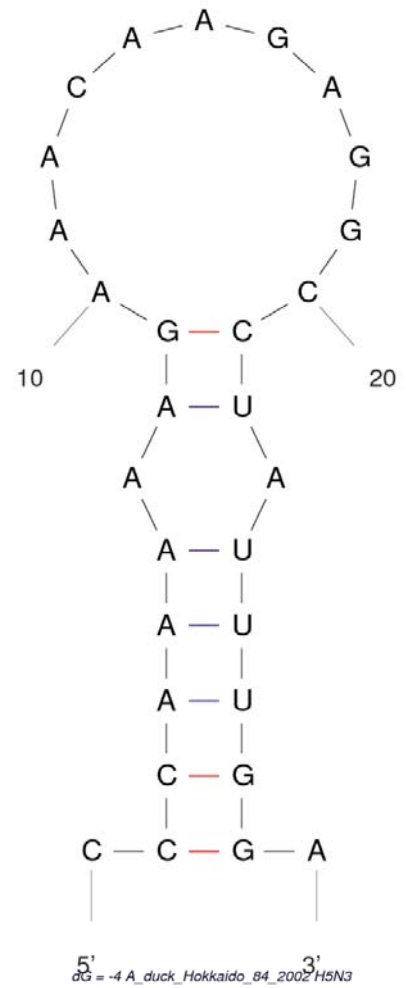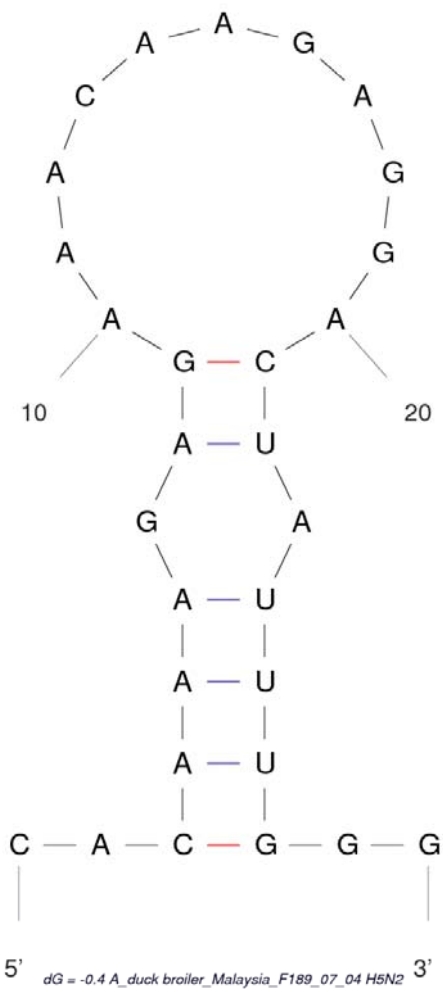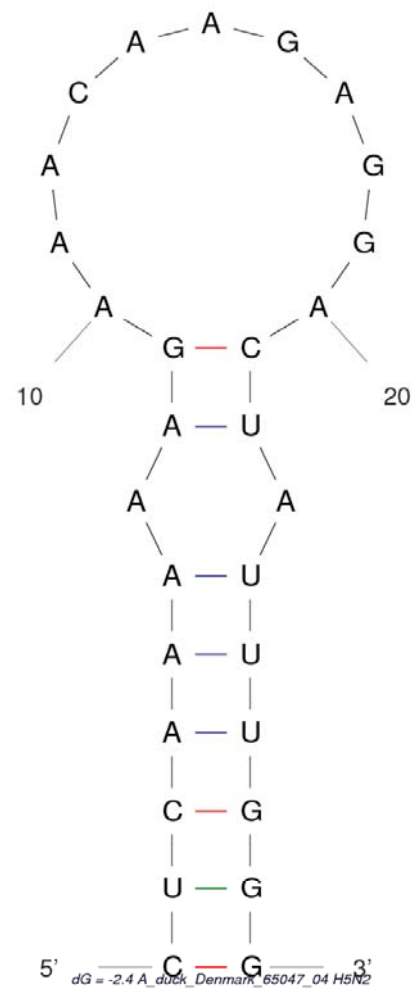

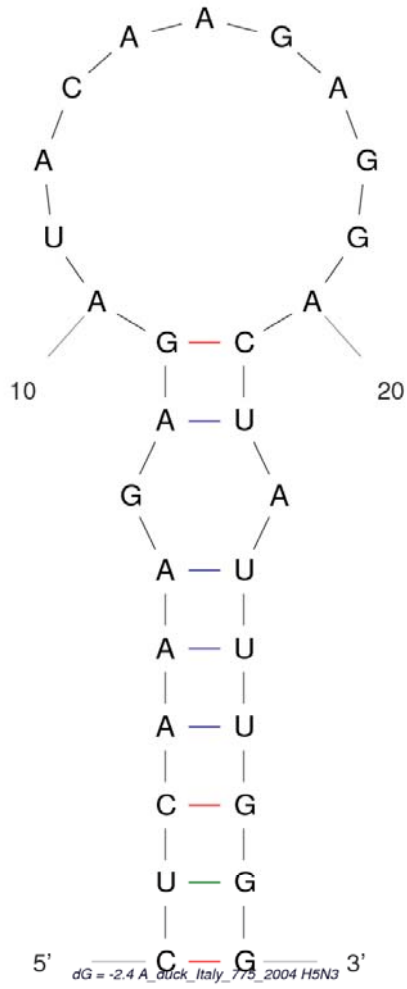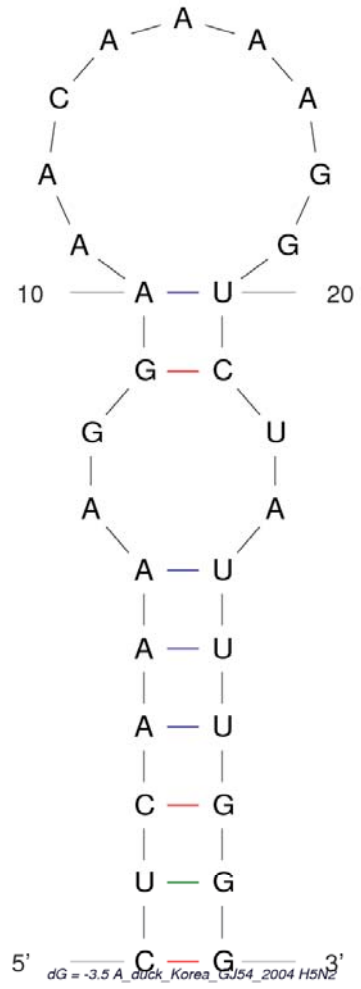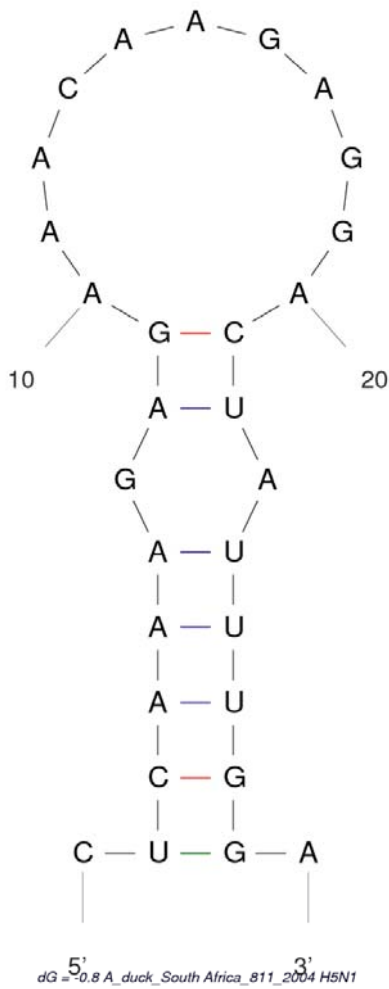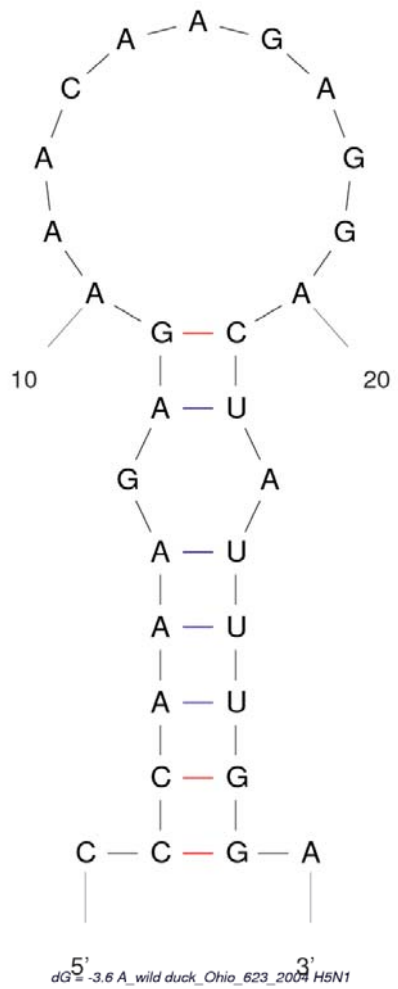

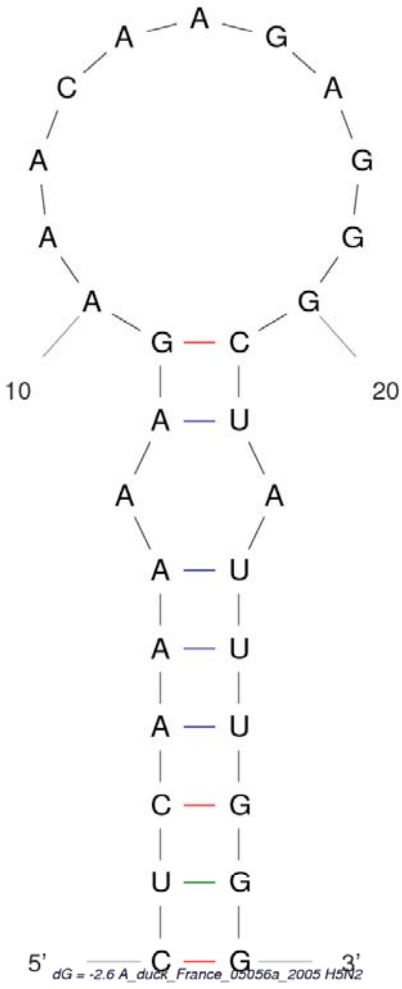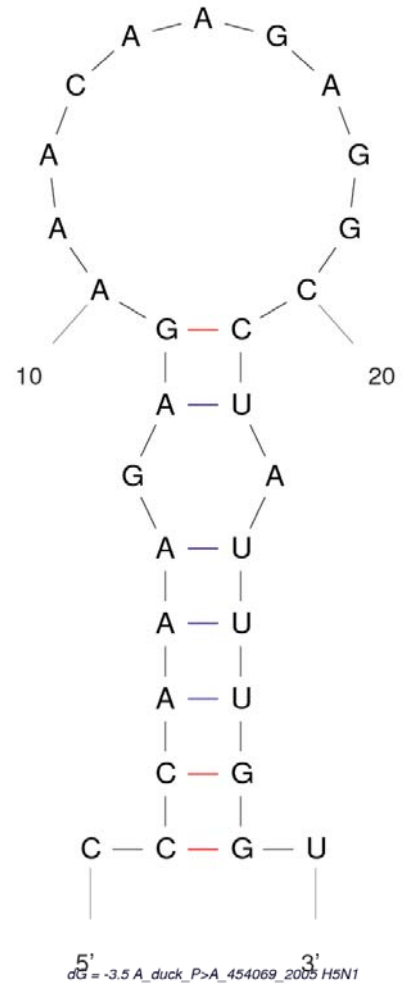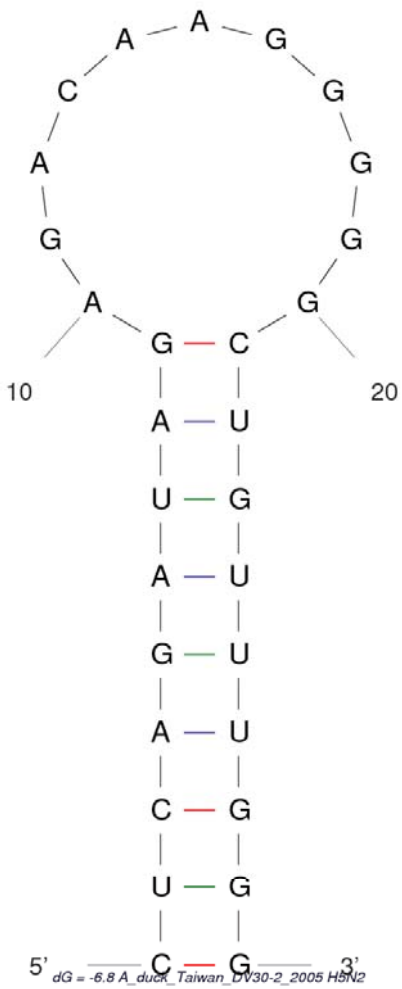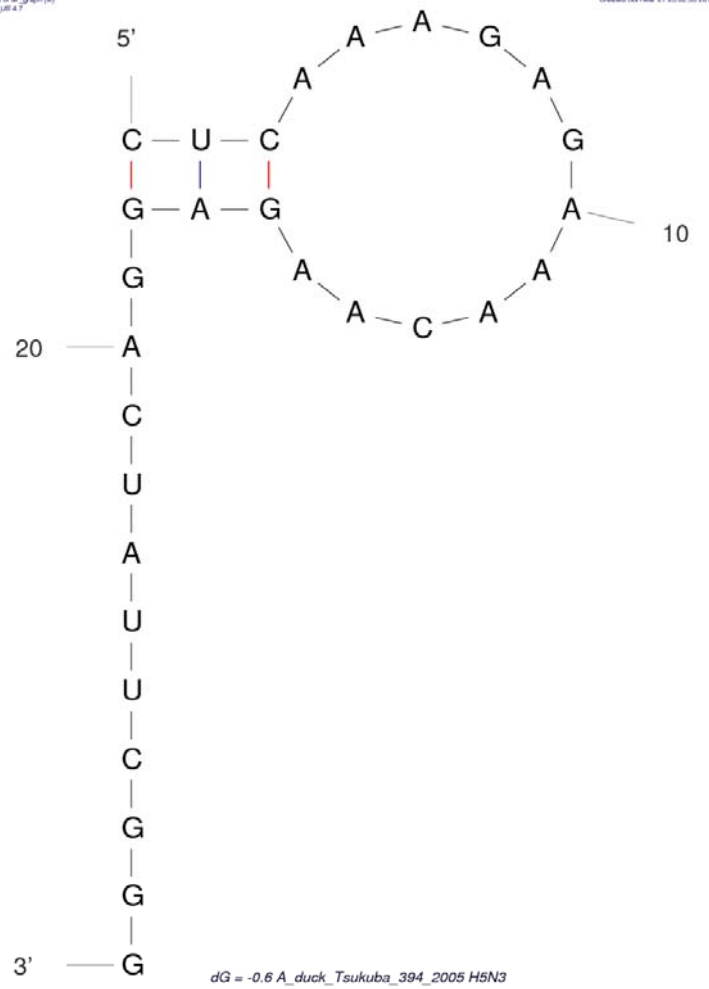



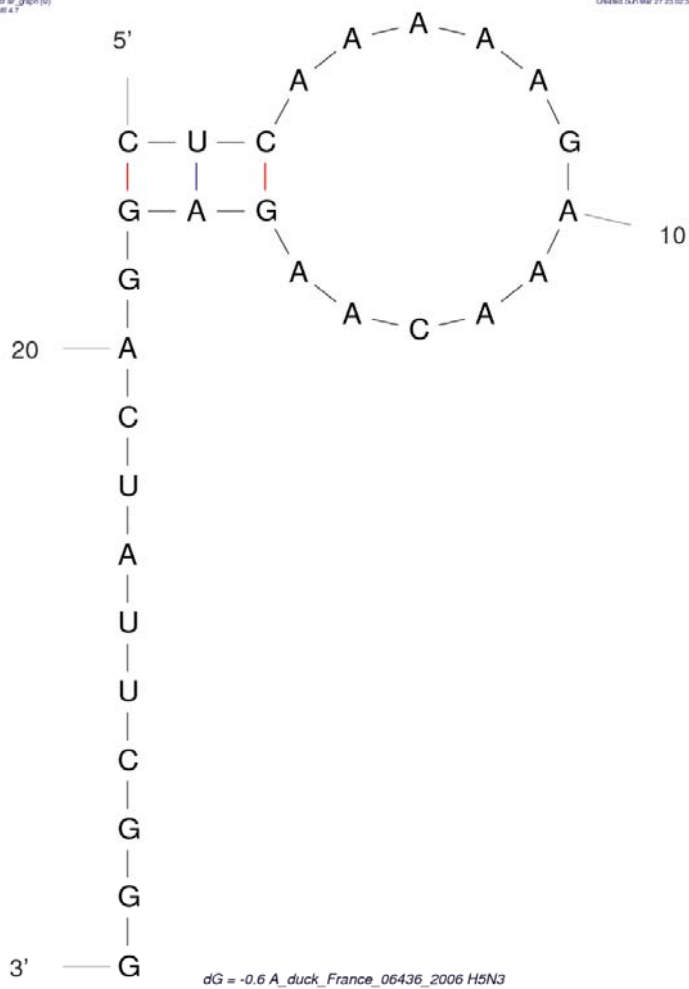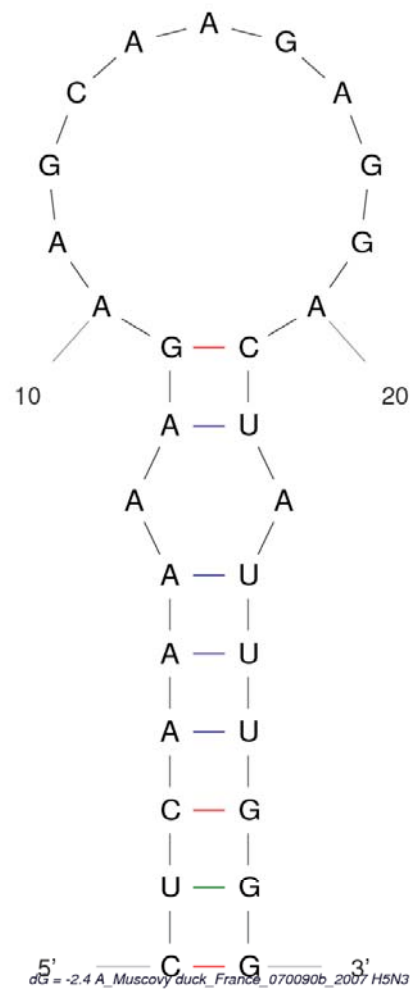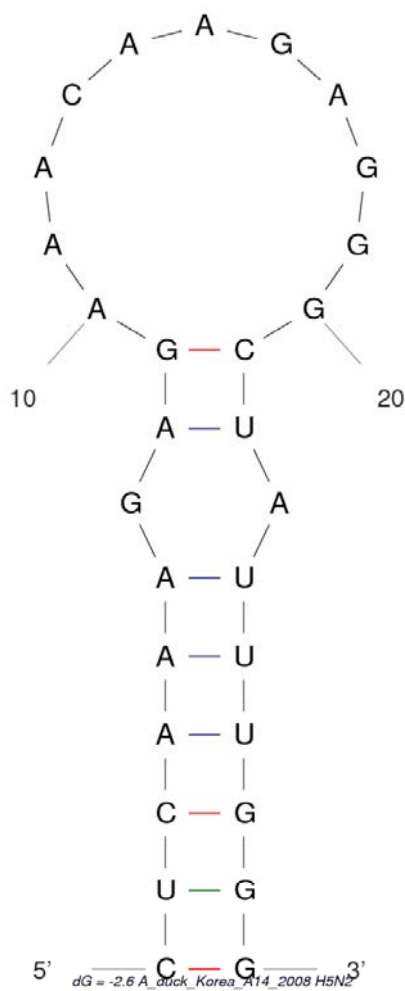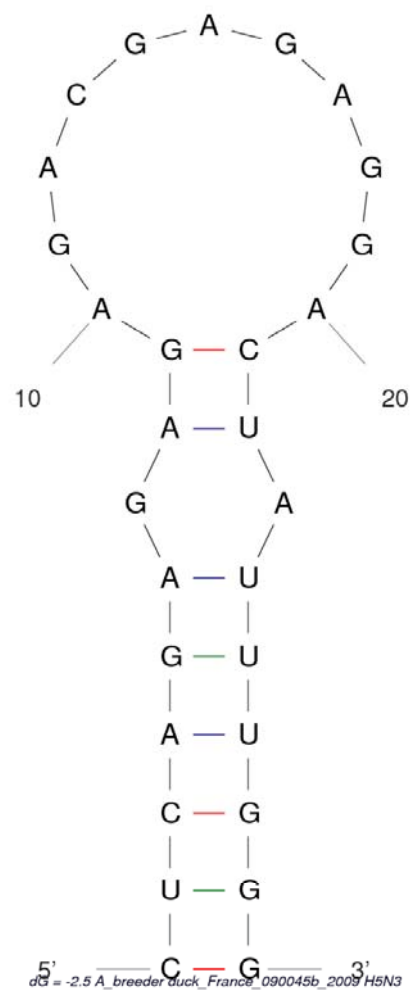

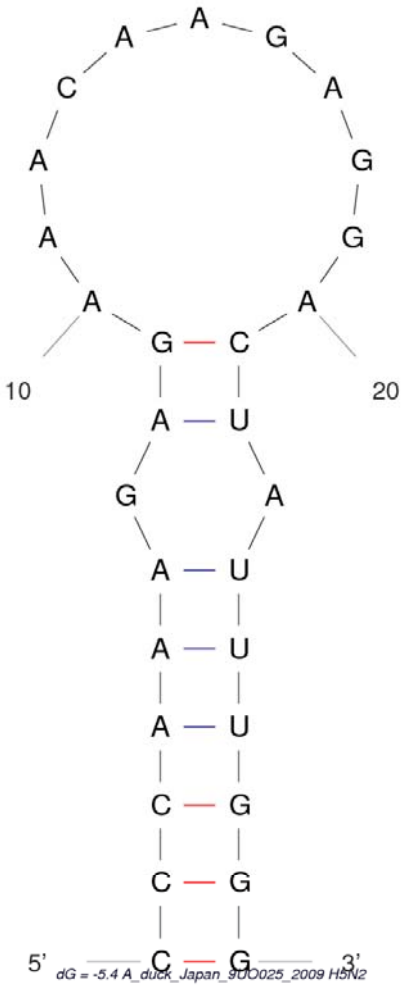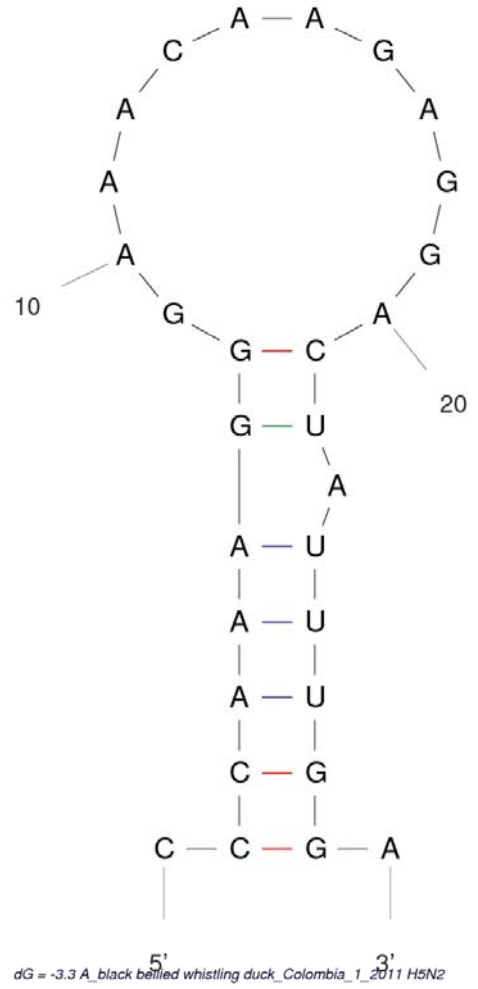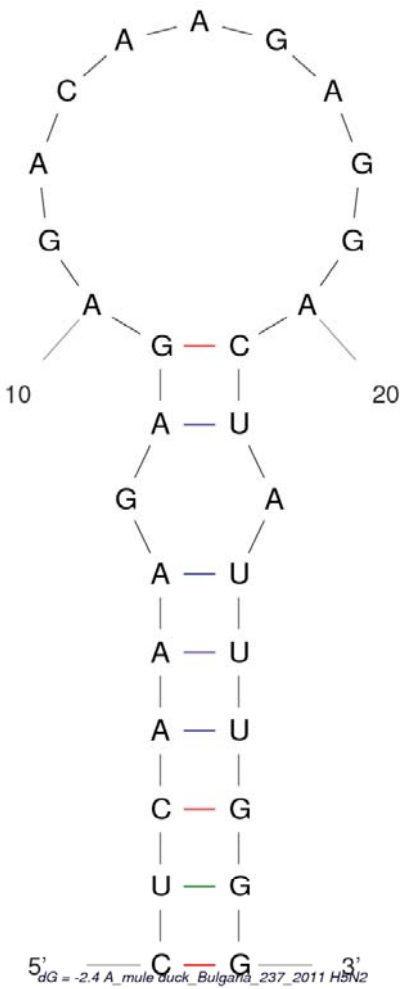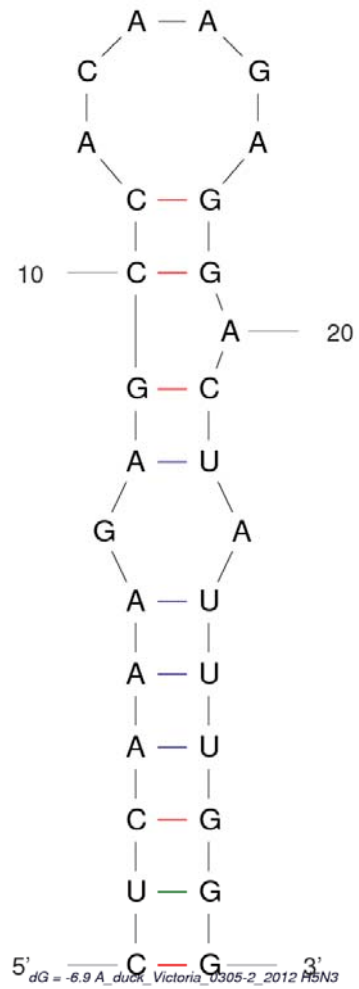

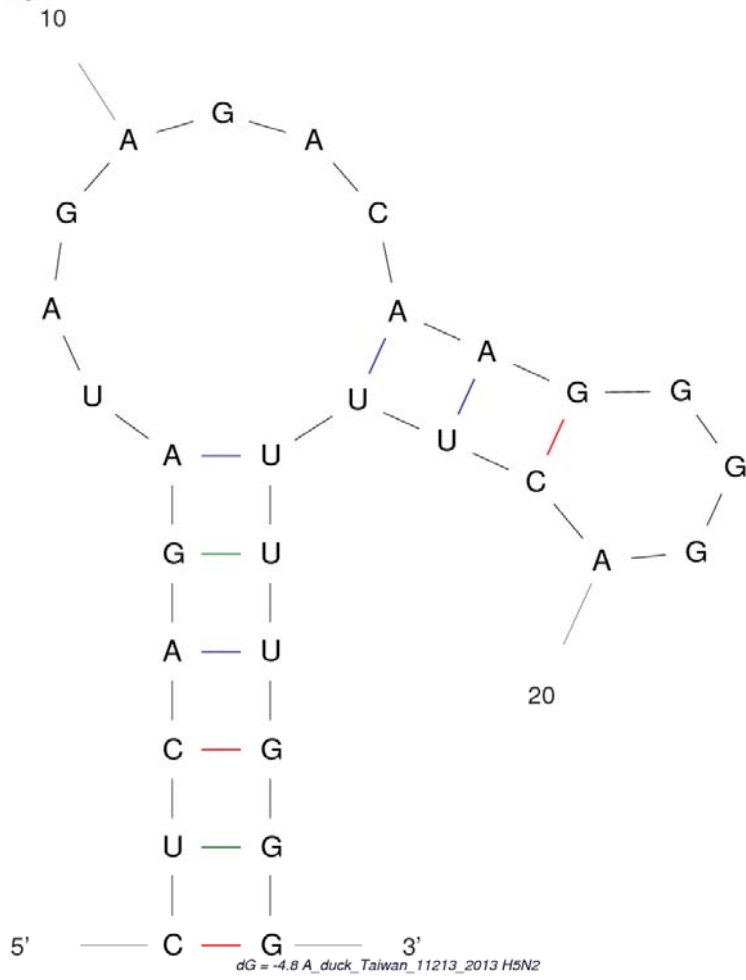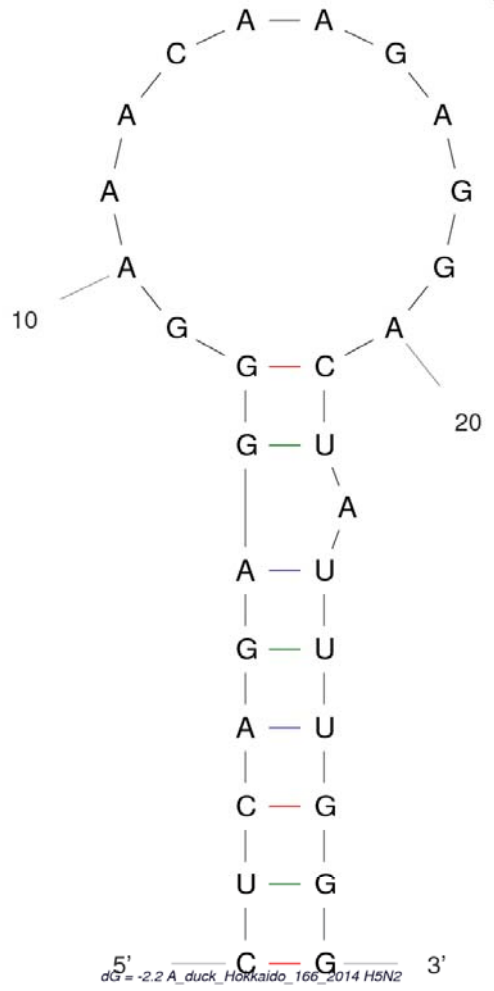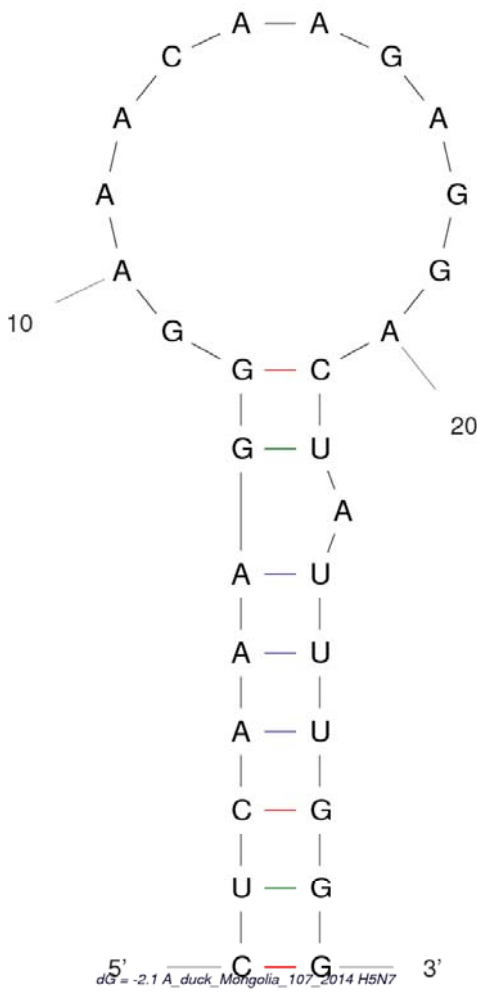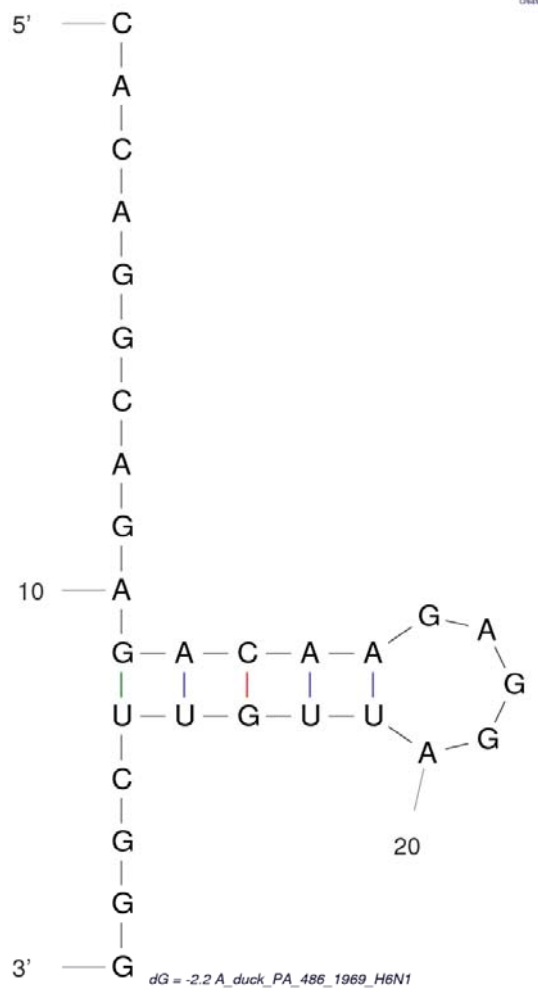

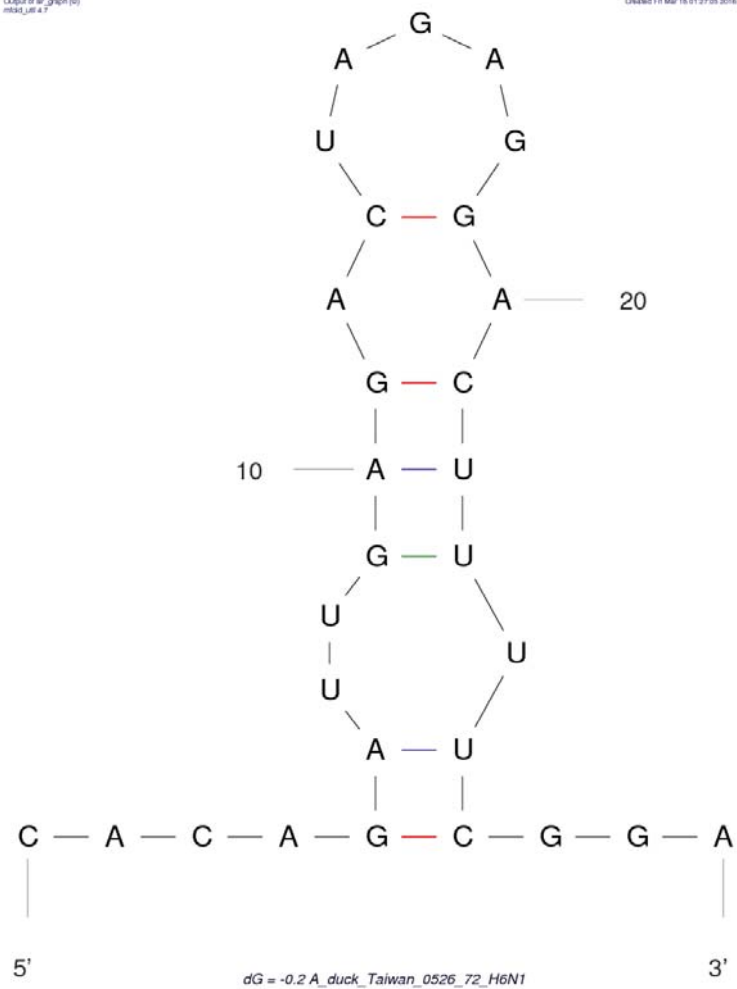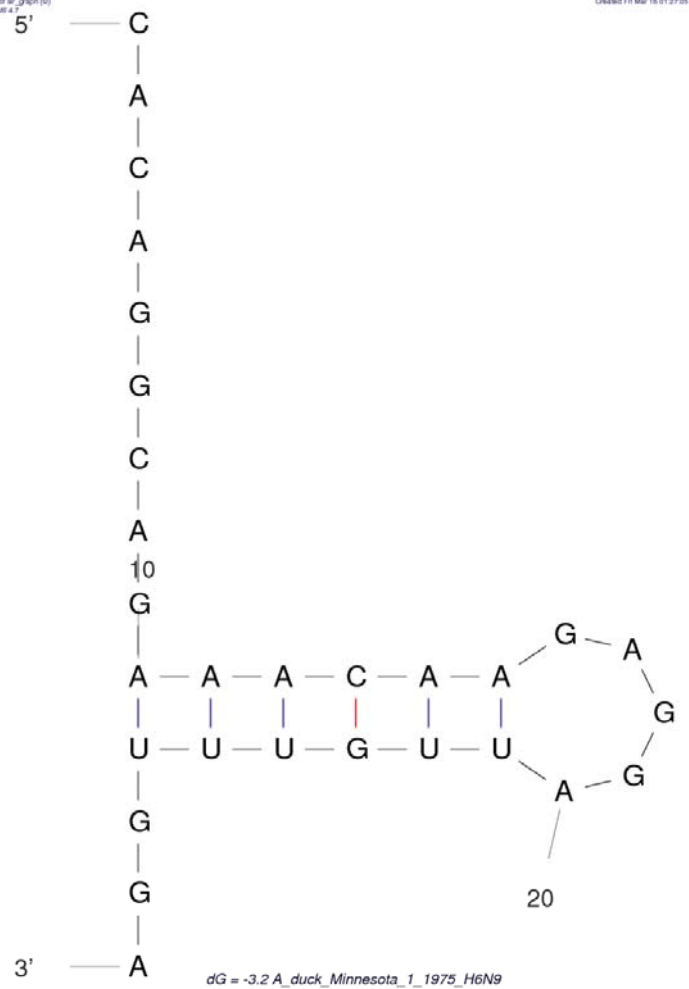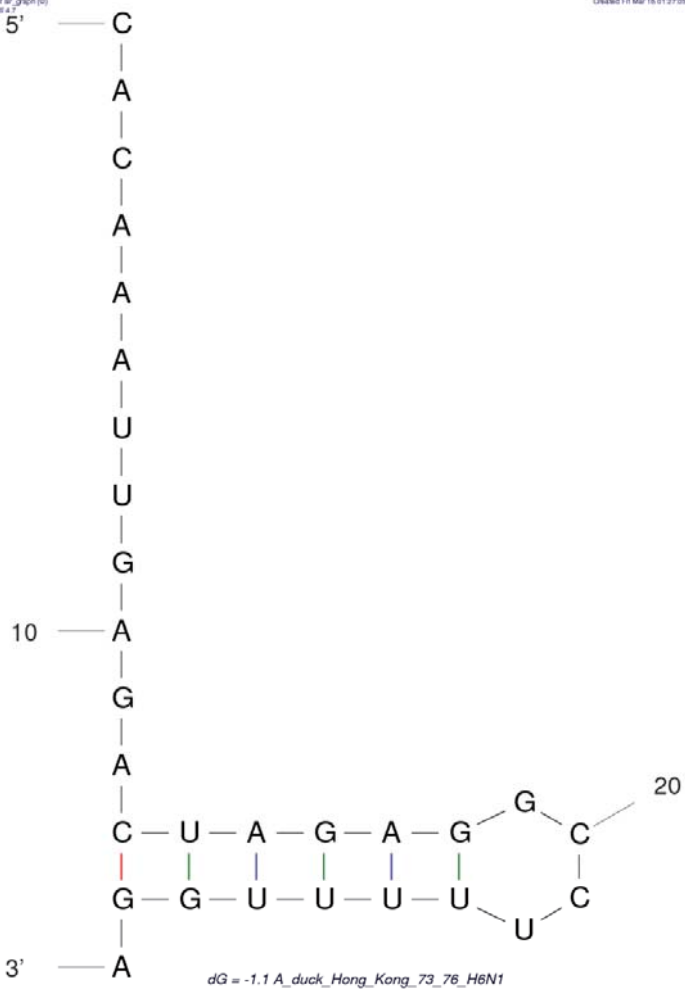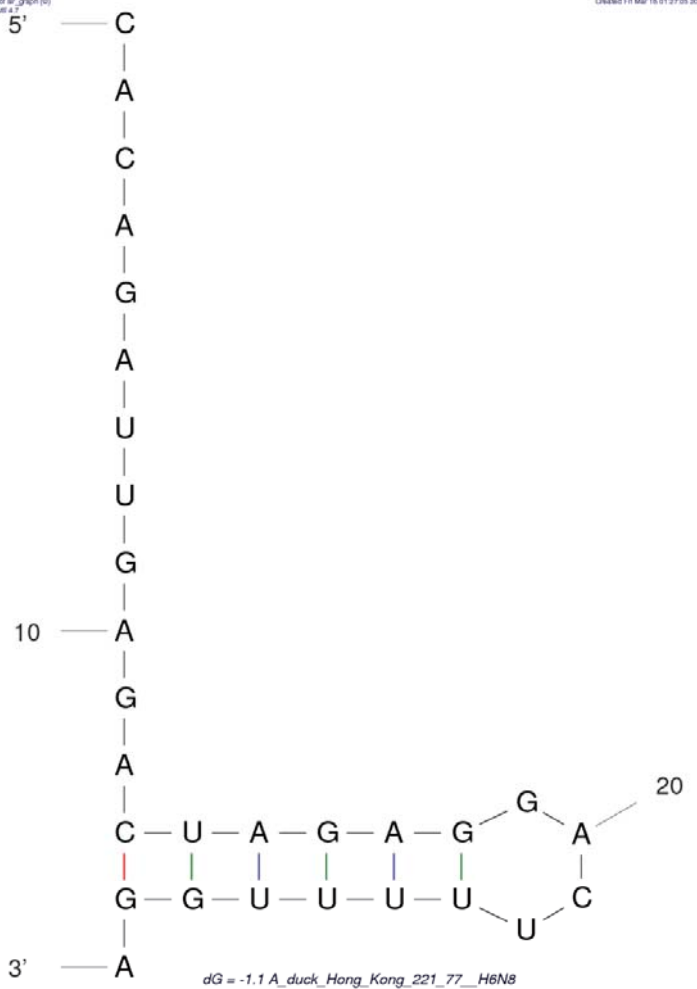

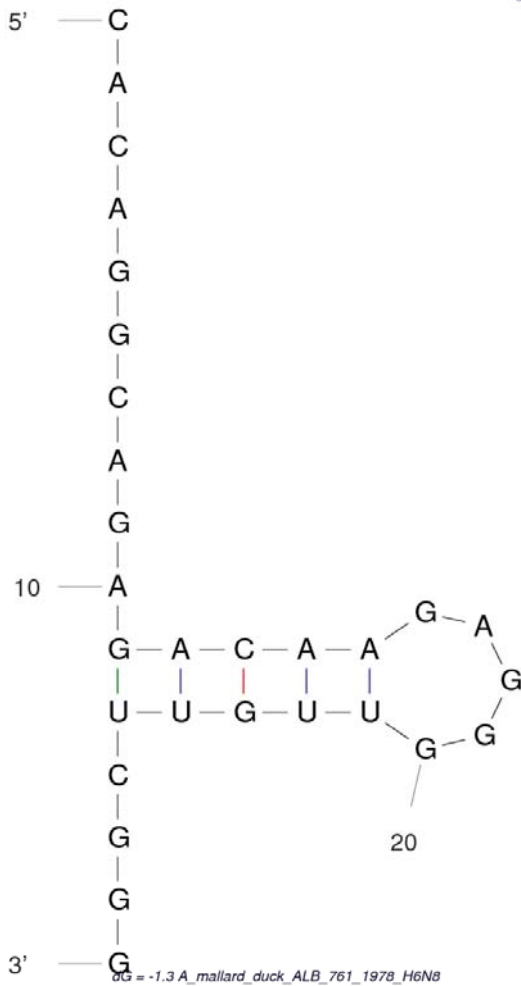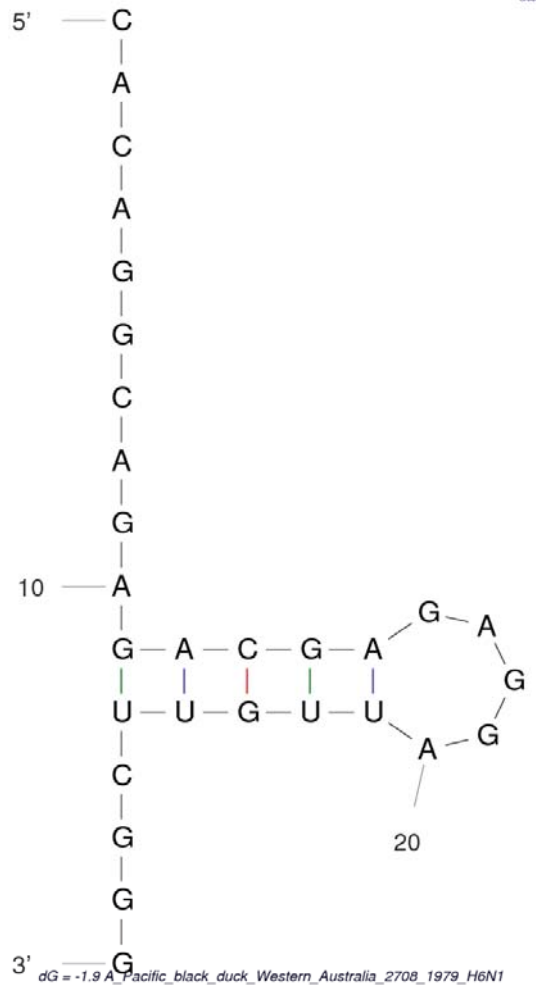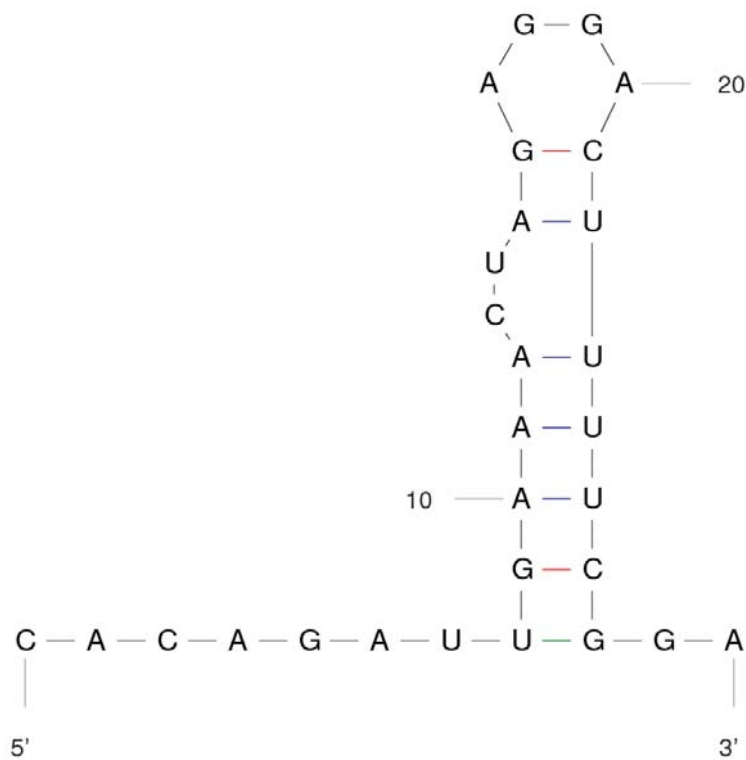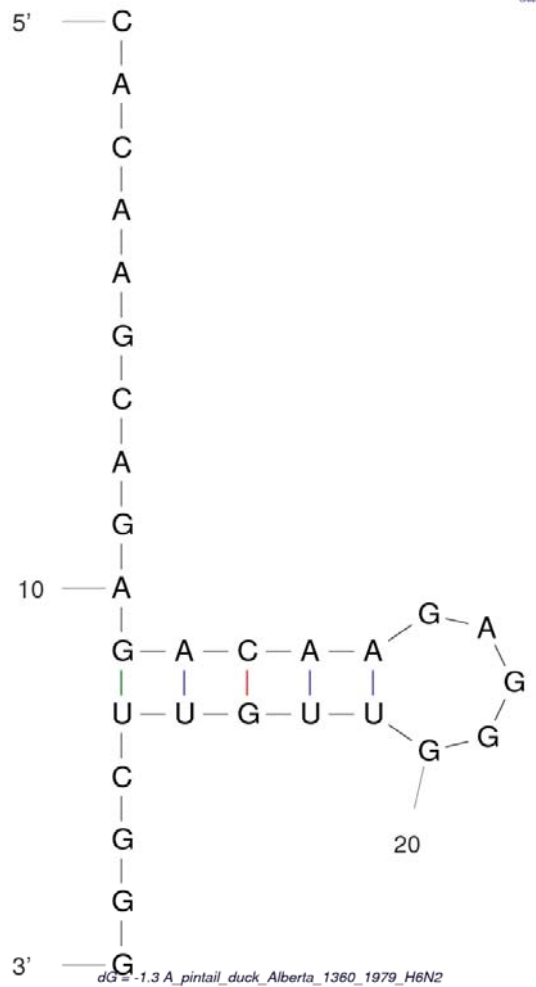

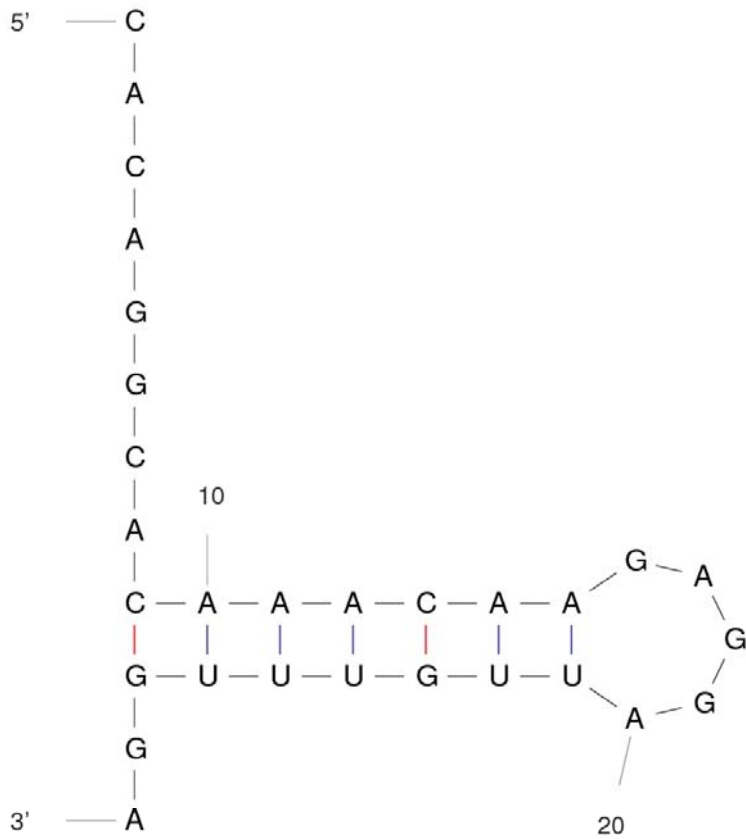

dG = -6.2 A\_black\_duck\_Ohio\_101\_1986\_H6N2

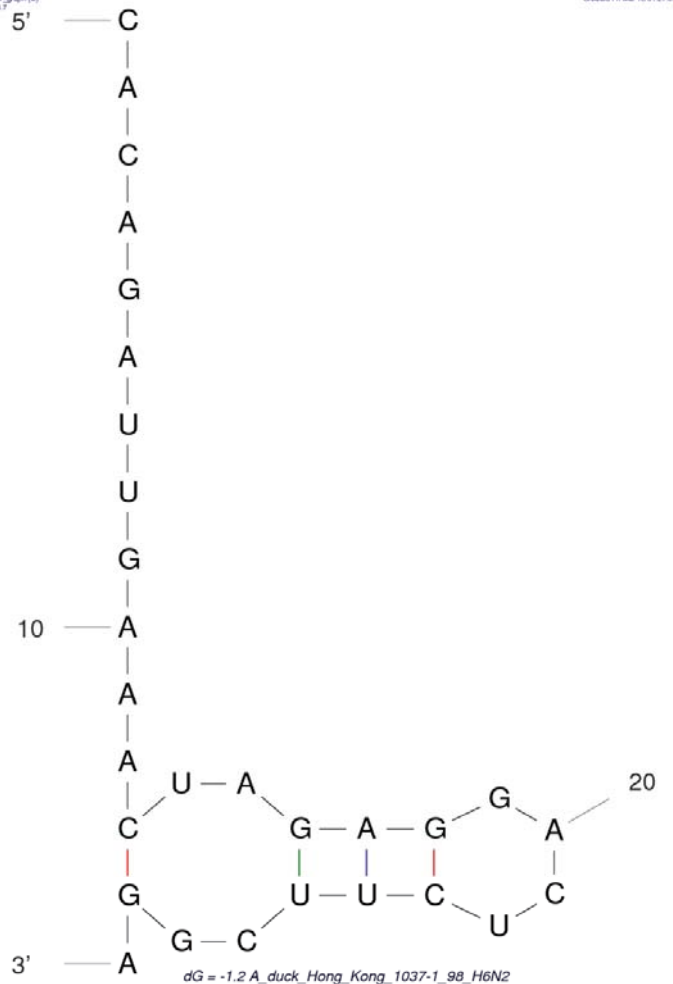

dG = -1.2 A\_duck\_Hong\_Kong\_1037-1\_98\_H6N2

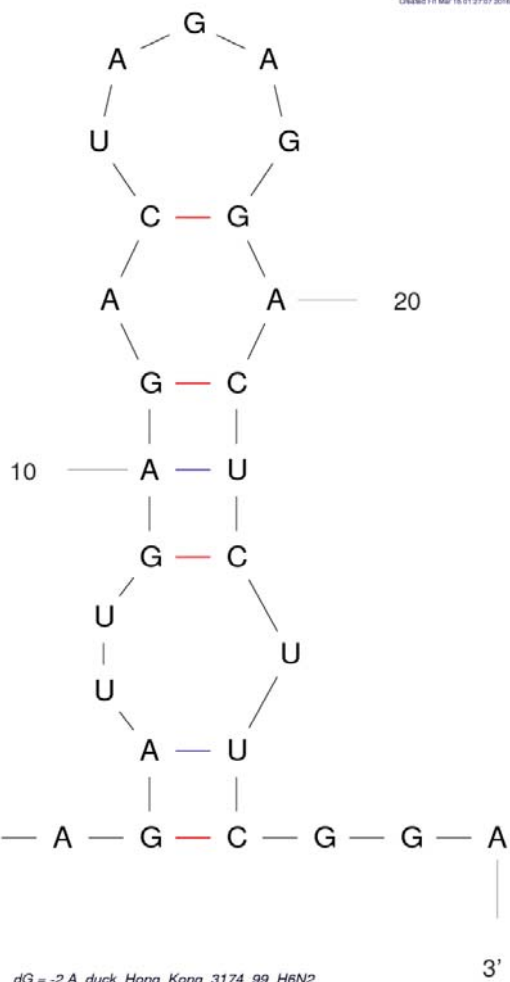

dG = -2 A\_duck\_Hong\_Kong\_3174\_99\_H6N2

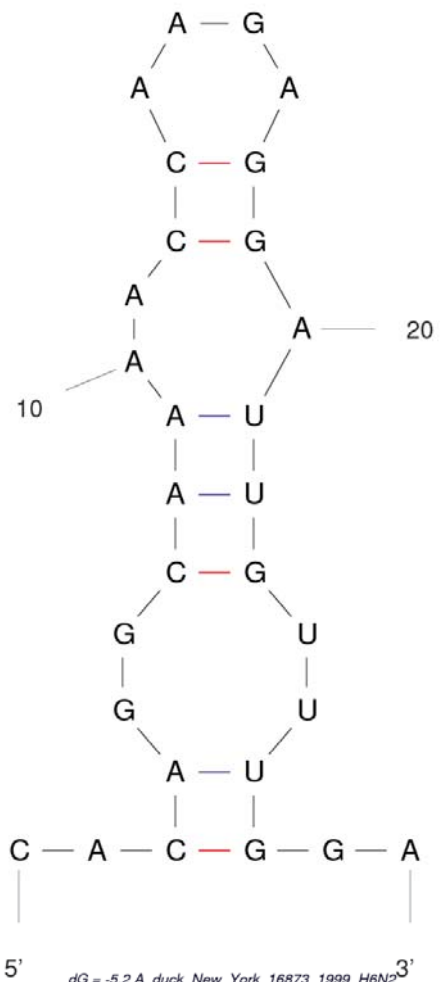

dG = -5.2 A\_duck\_New\_York\_16873\_1999\_H6N2

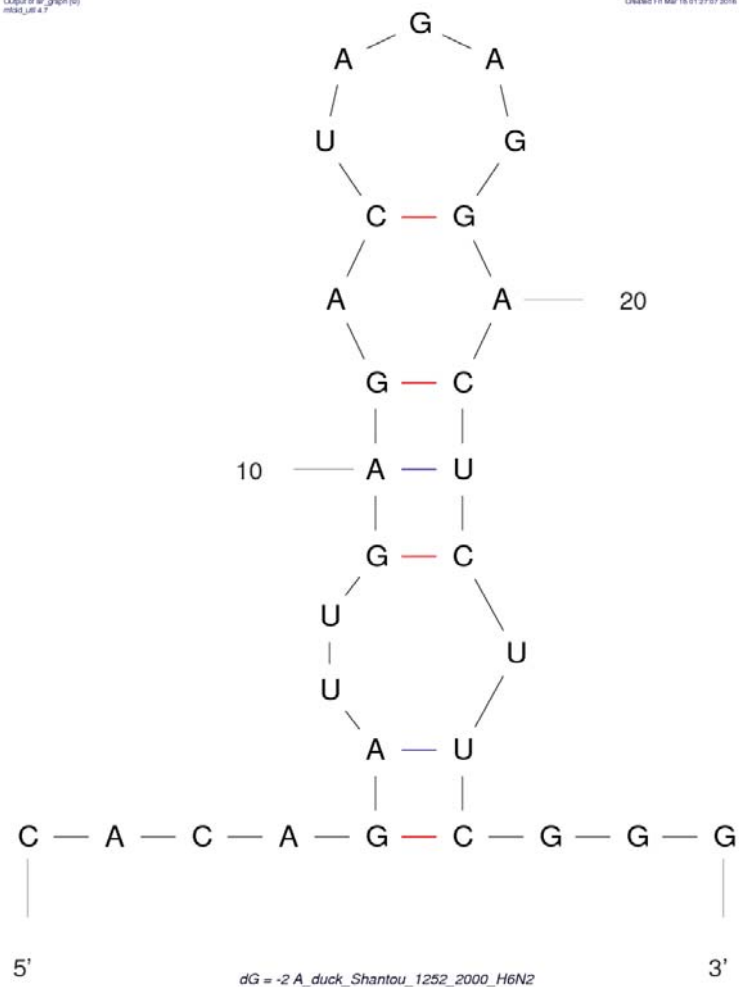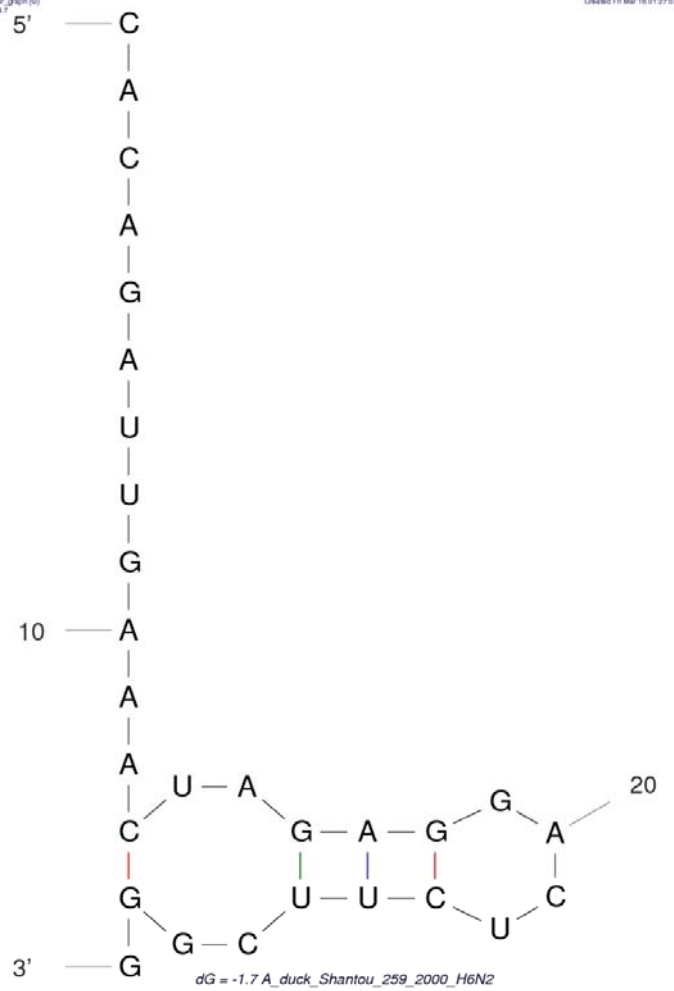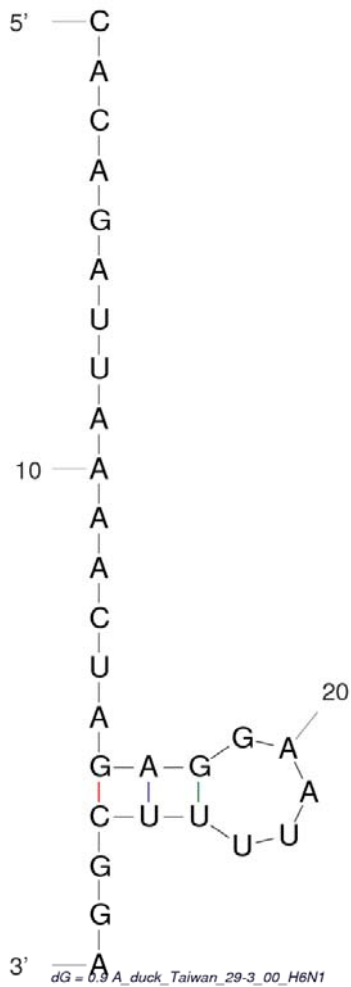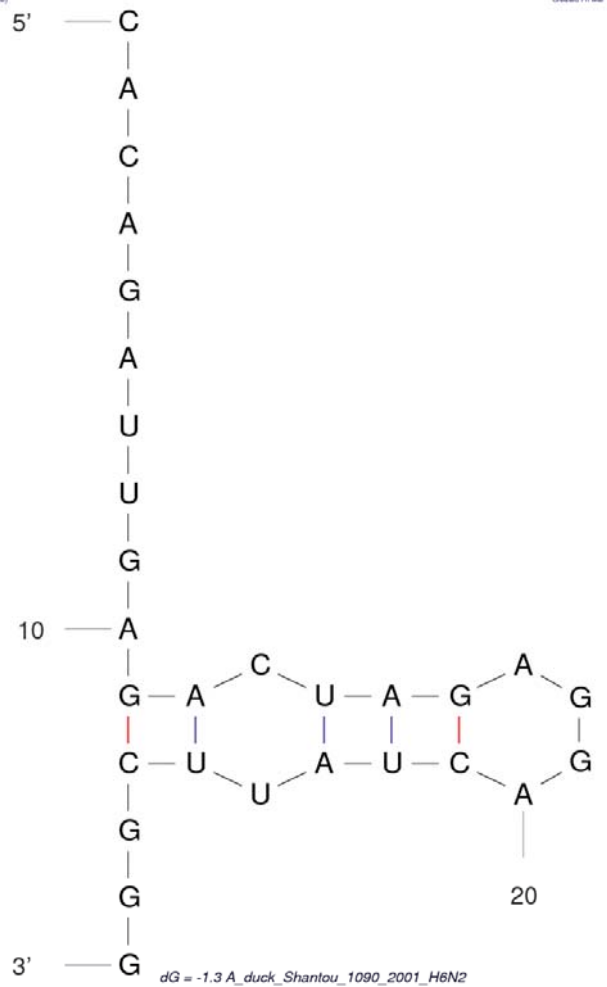

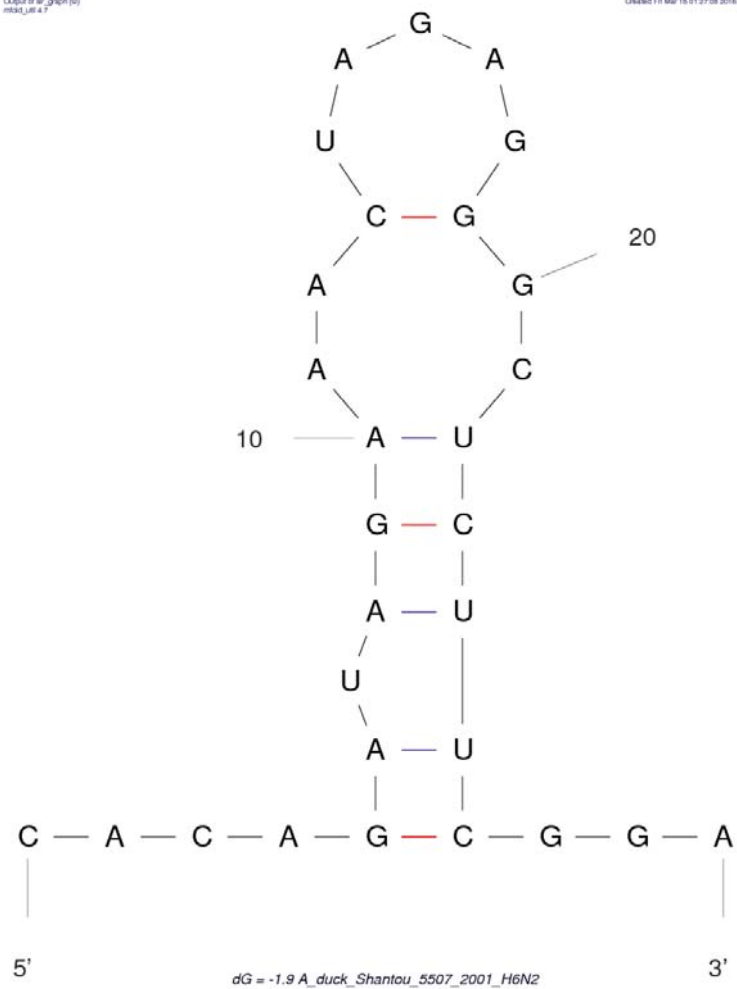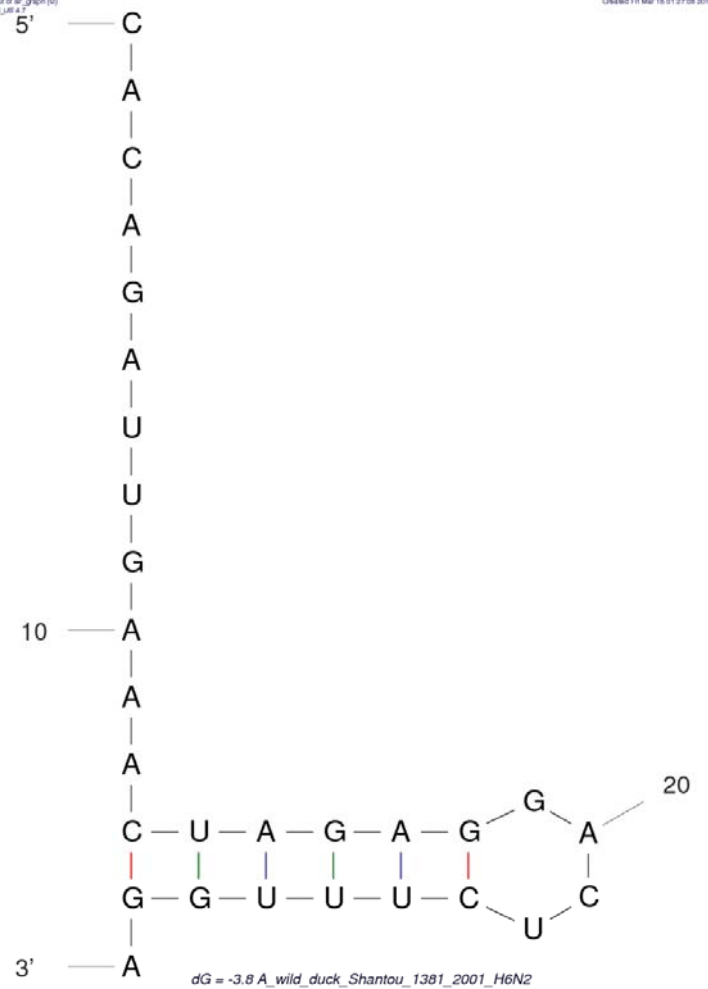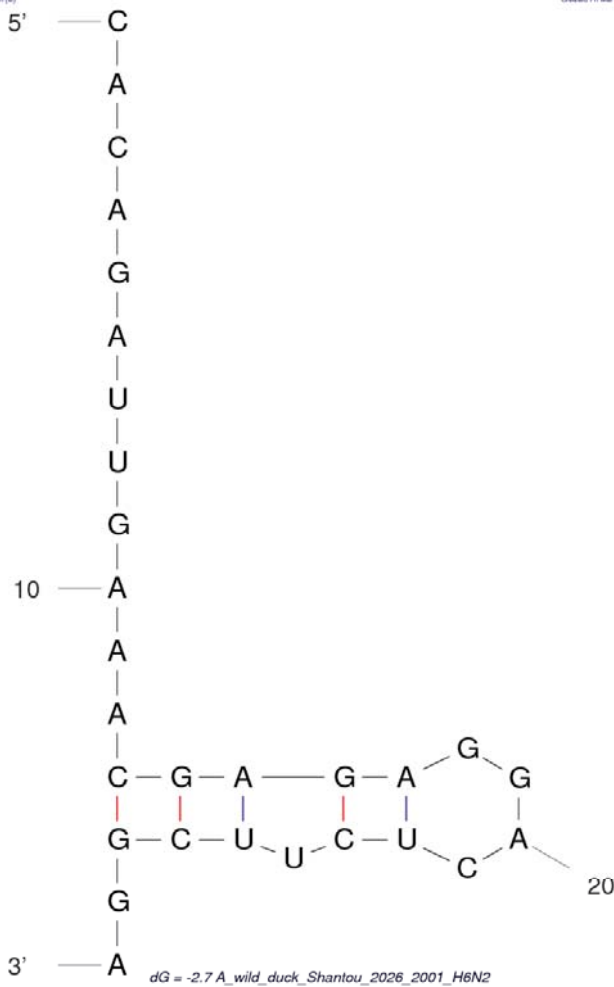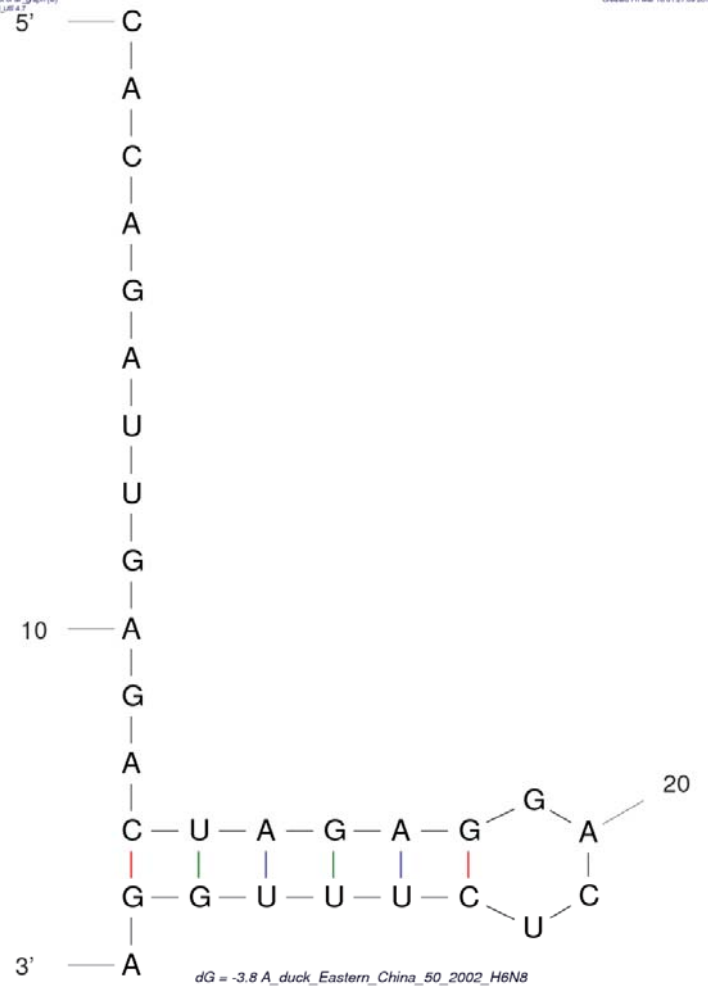



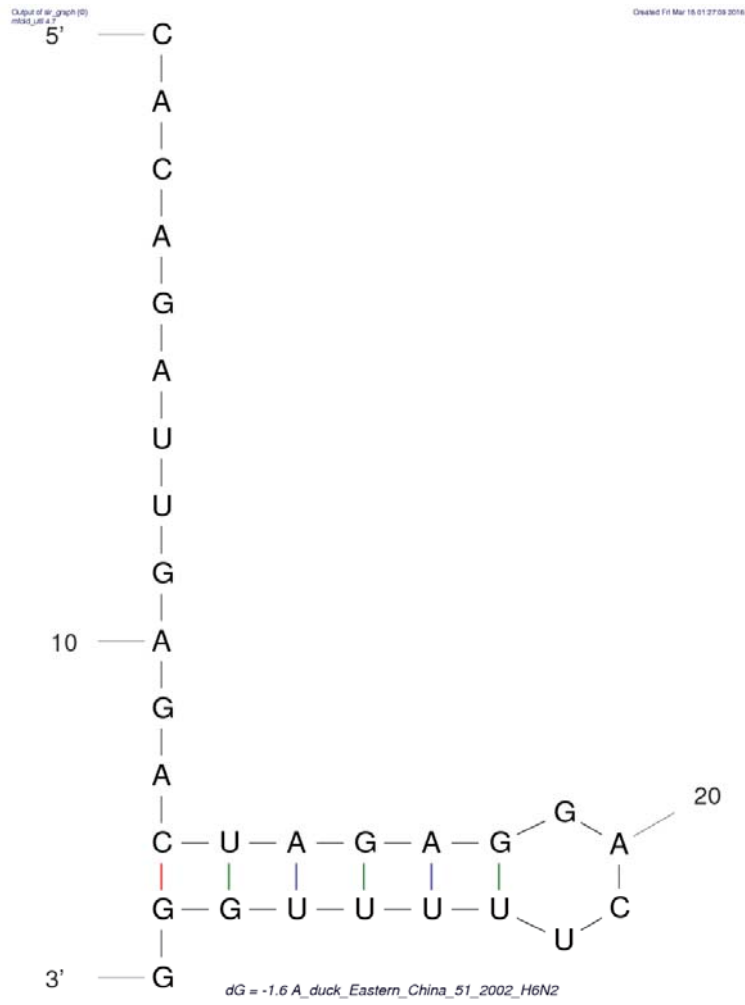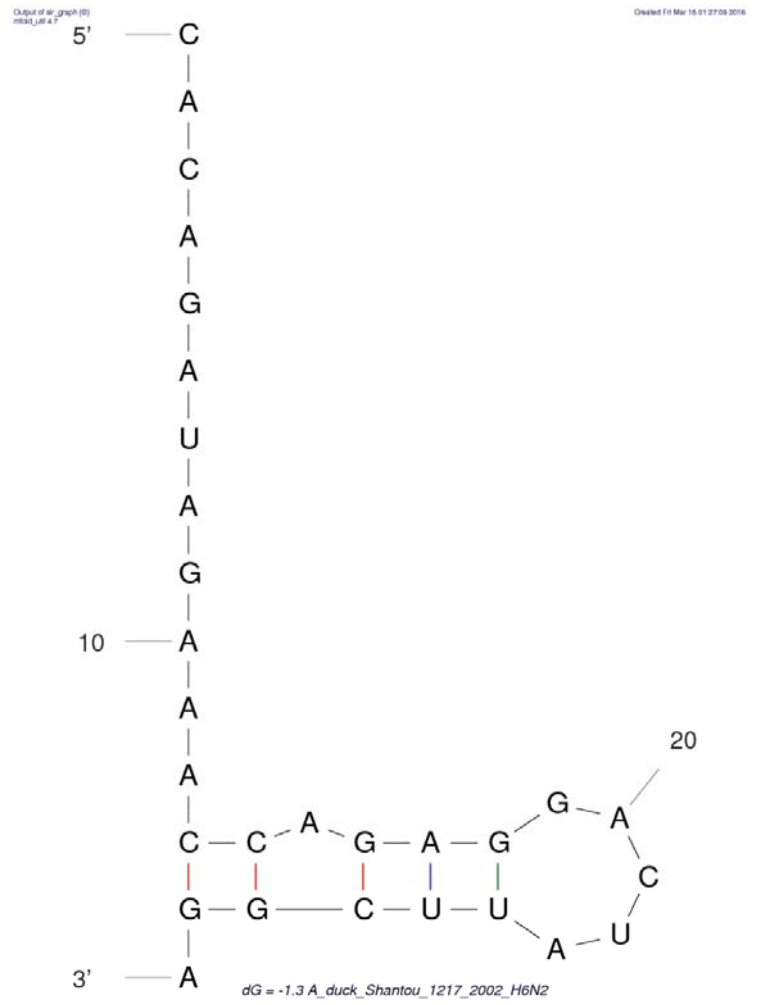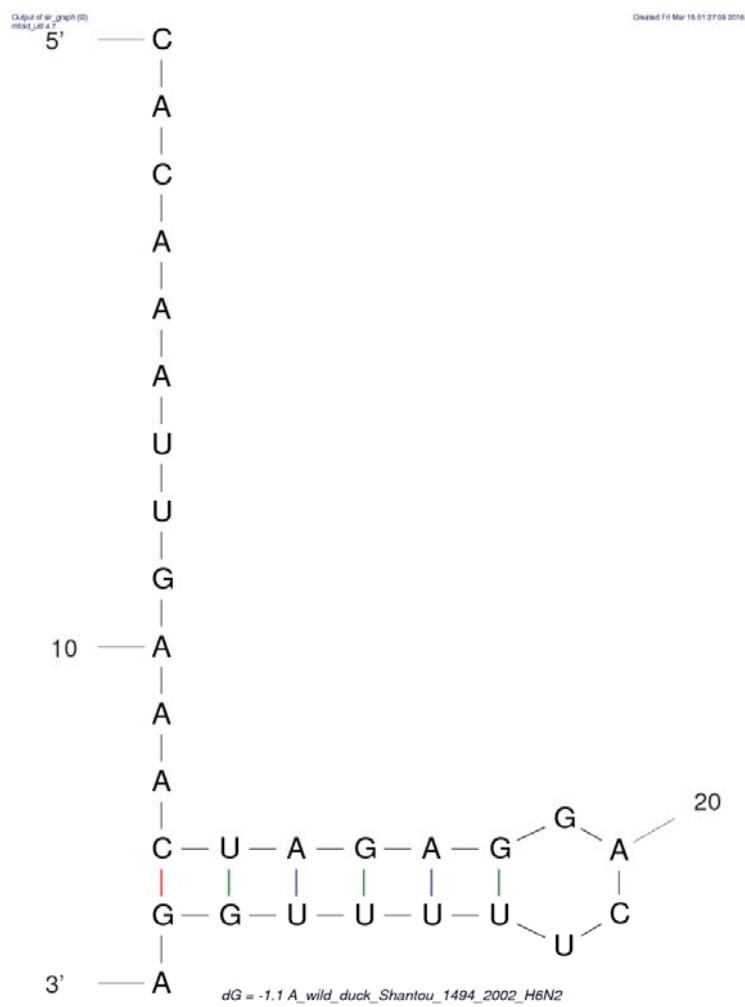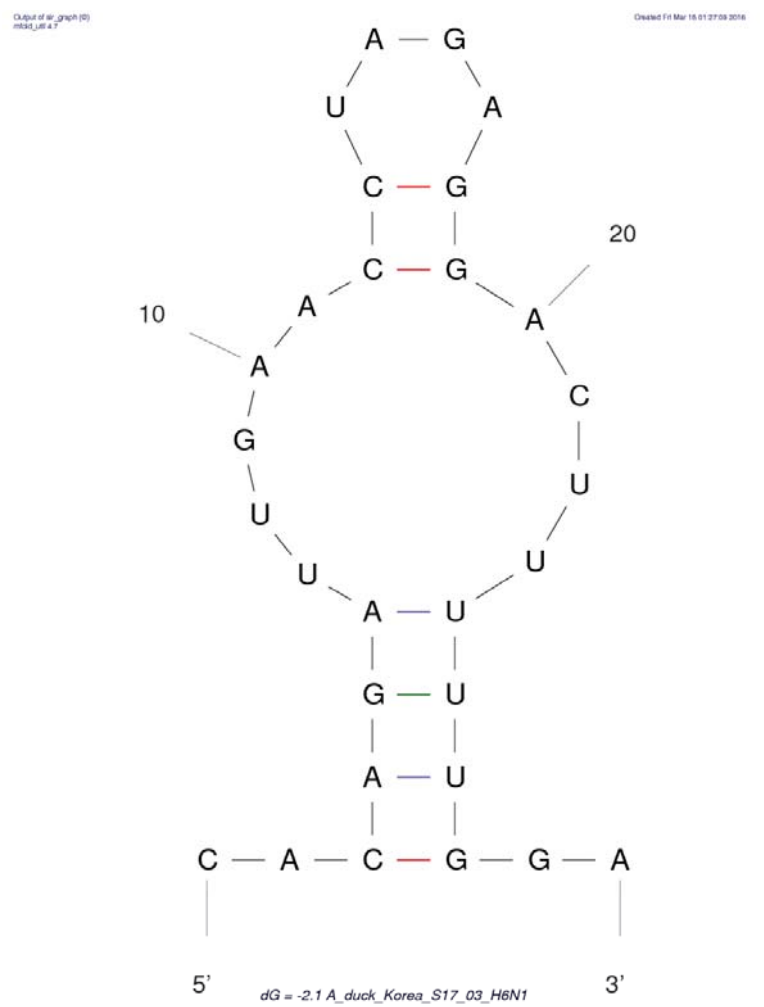

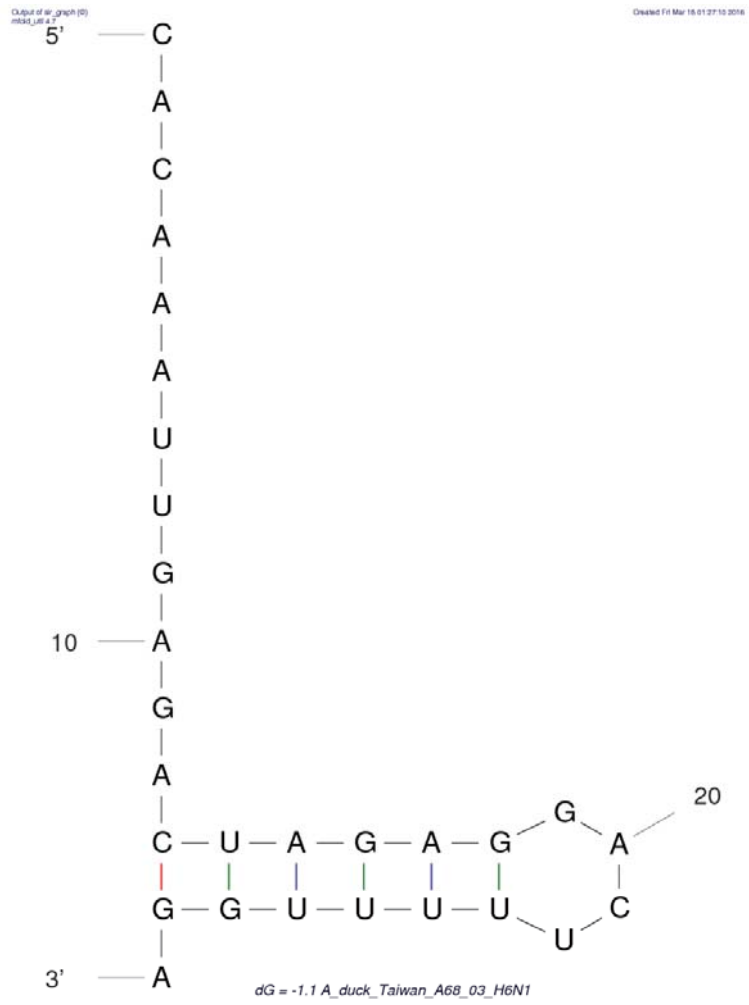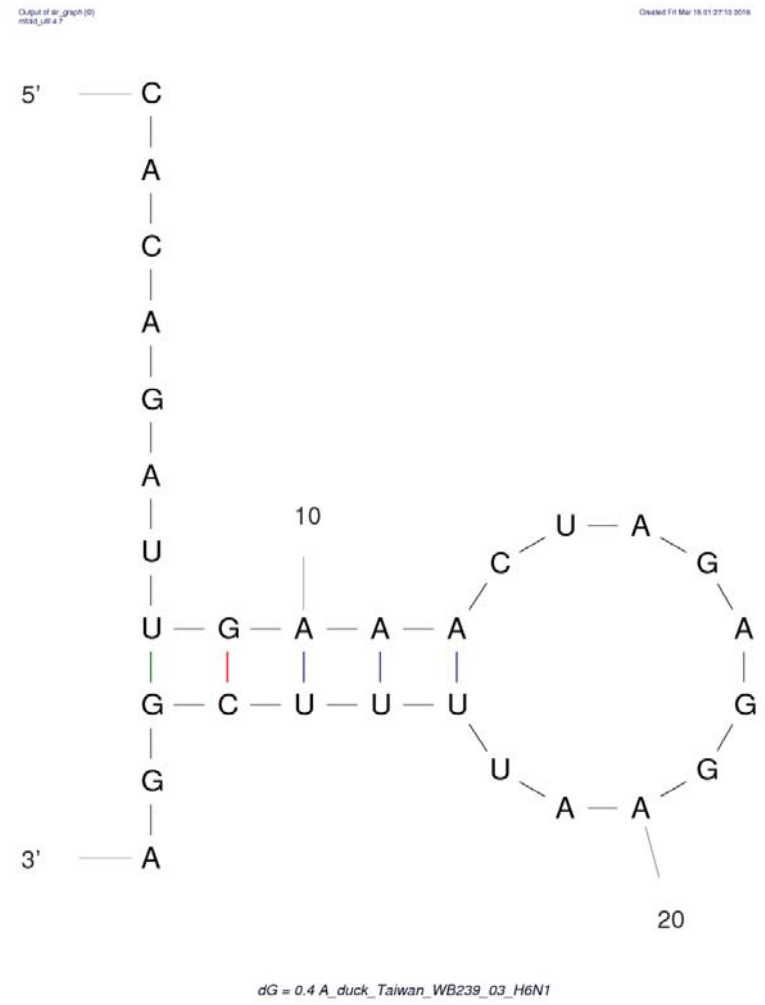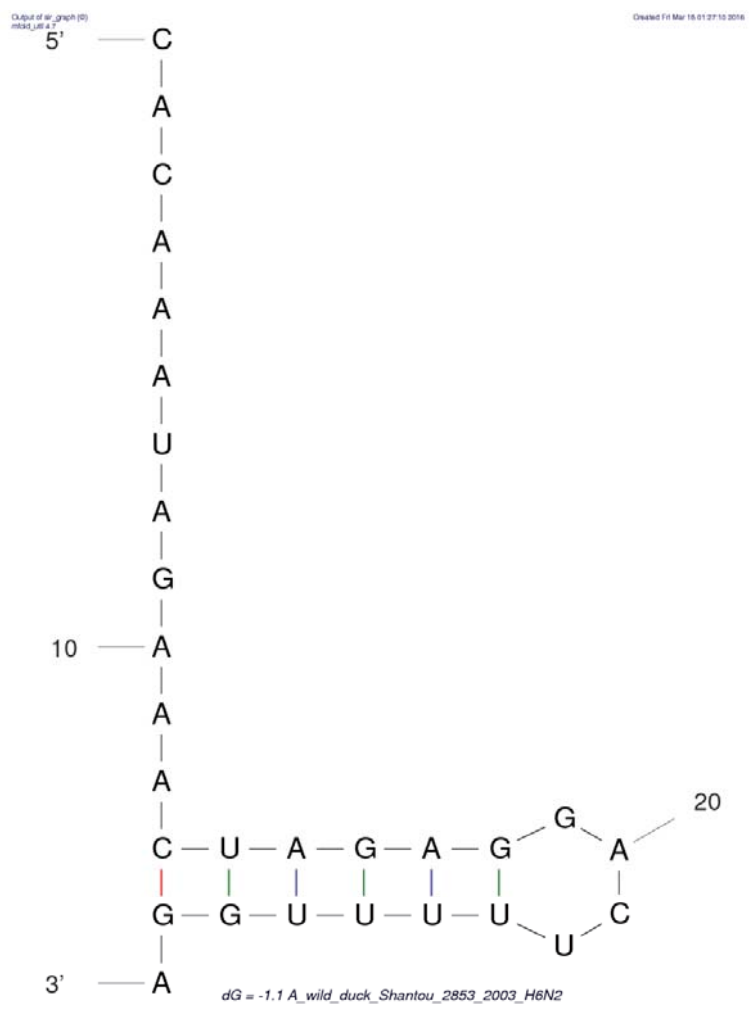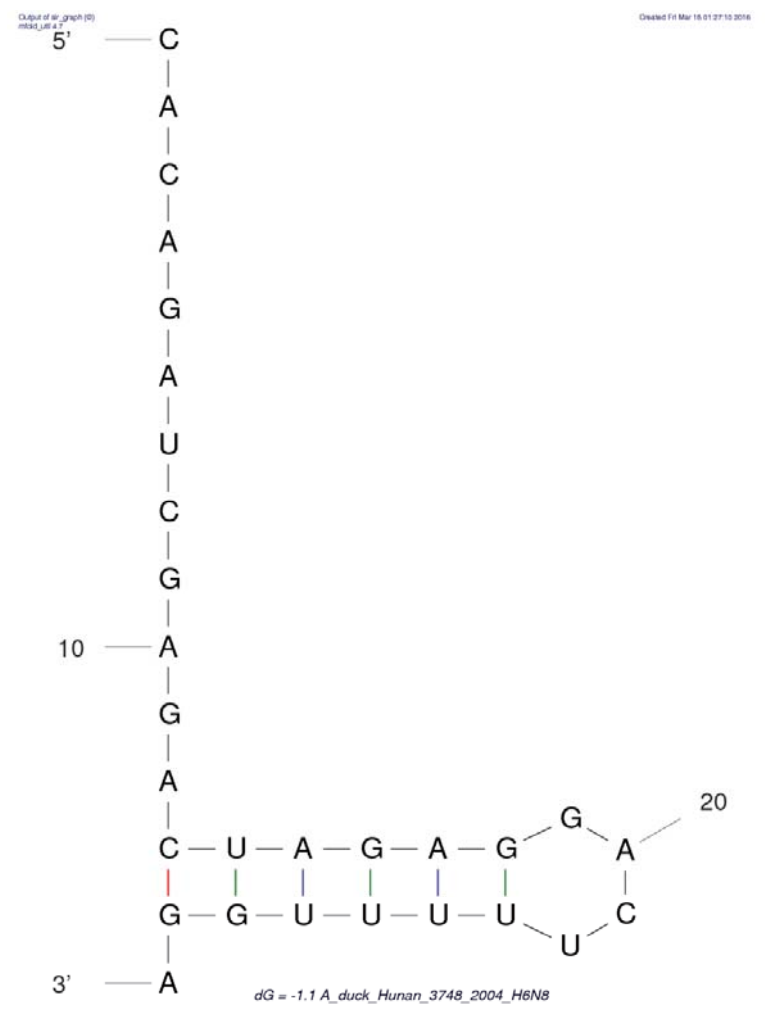

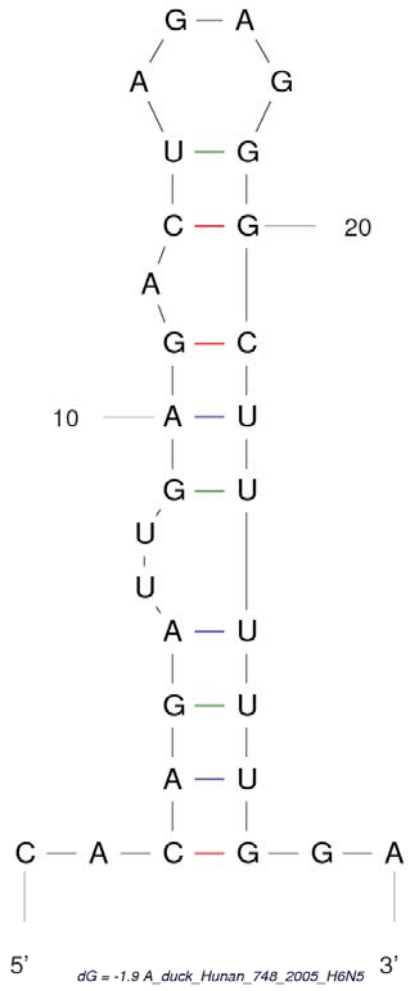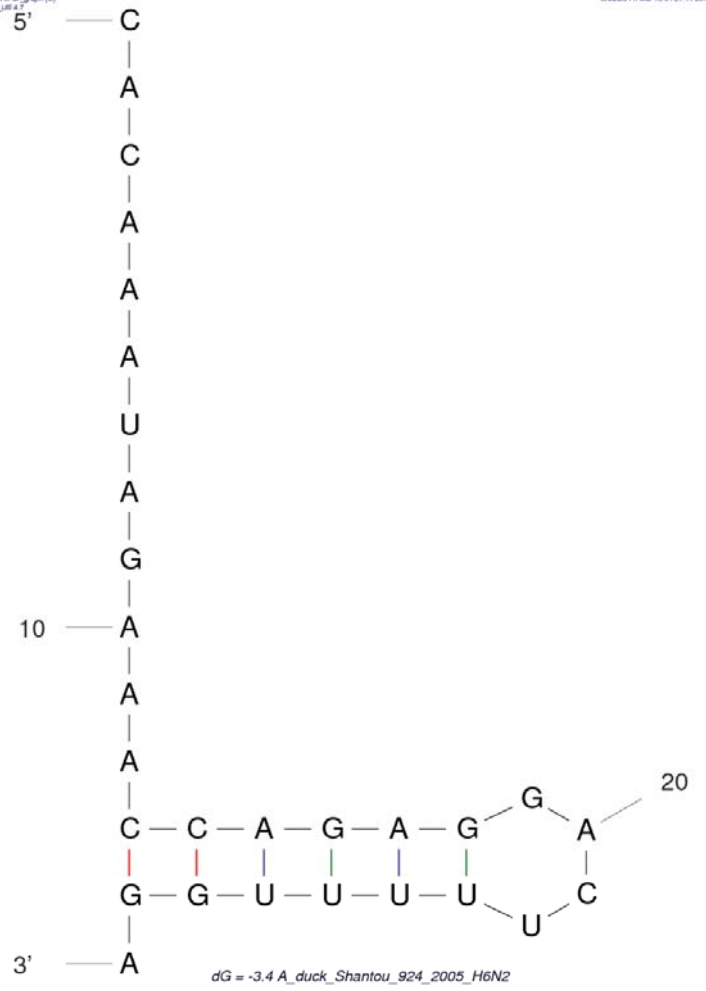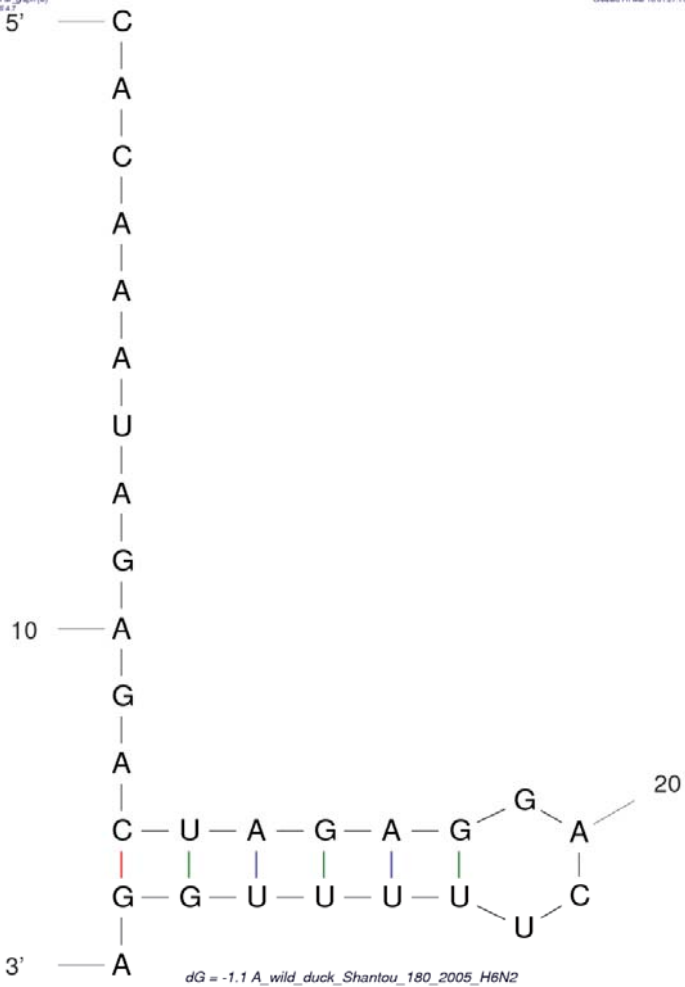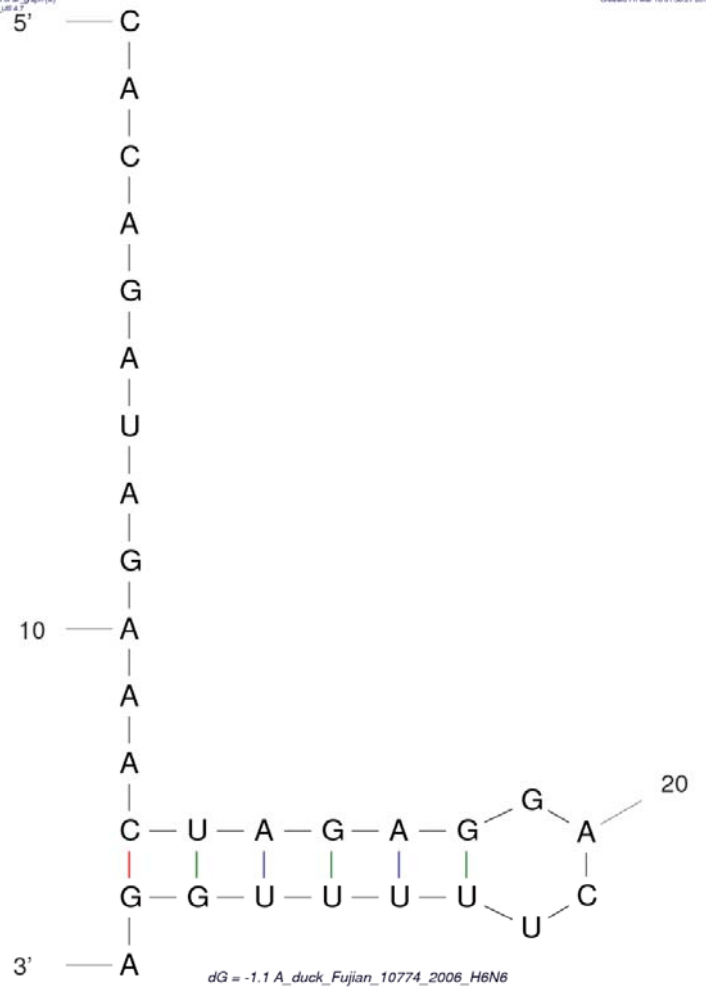

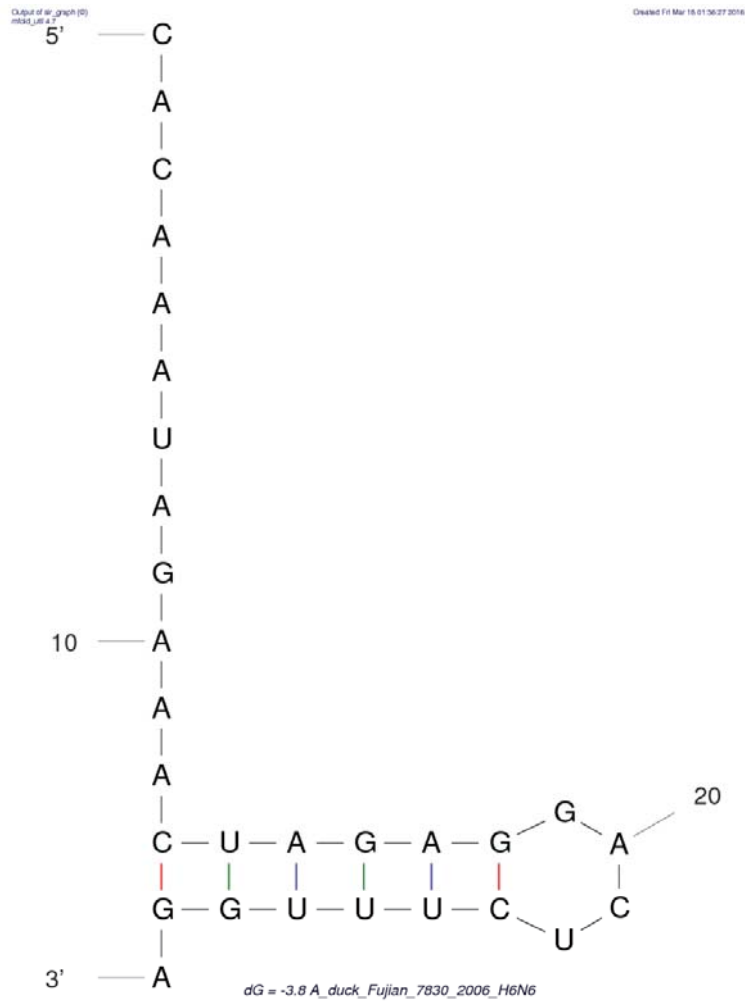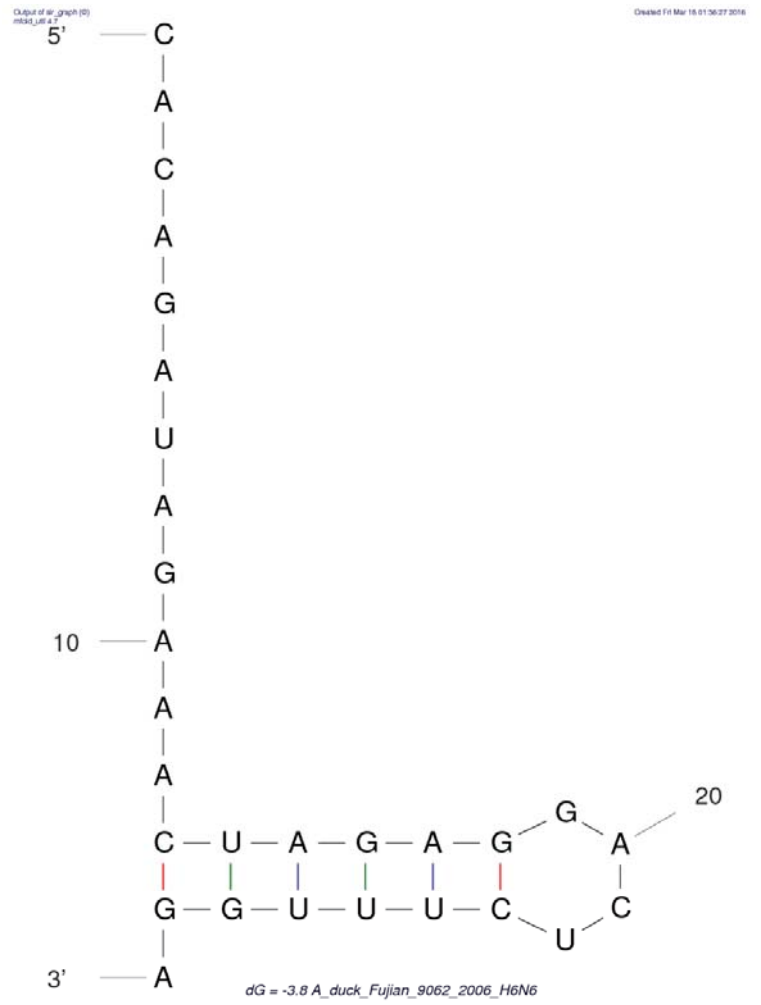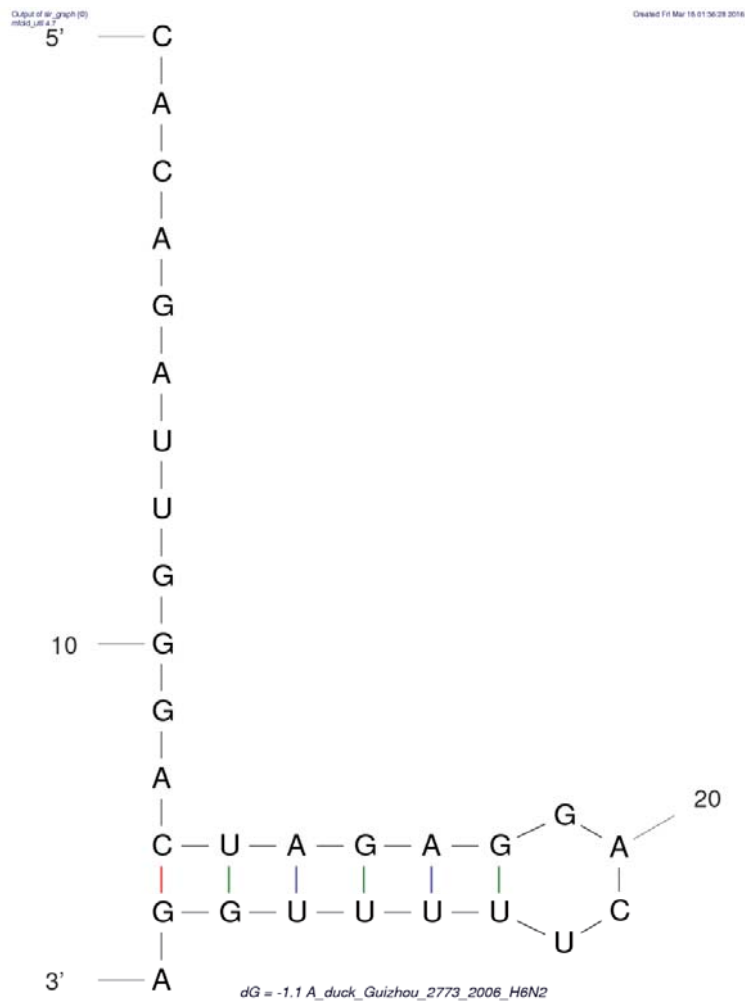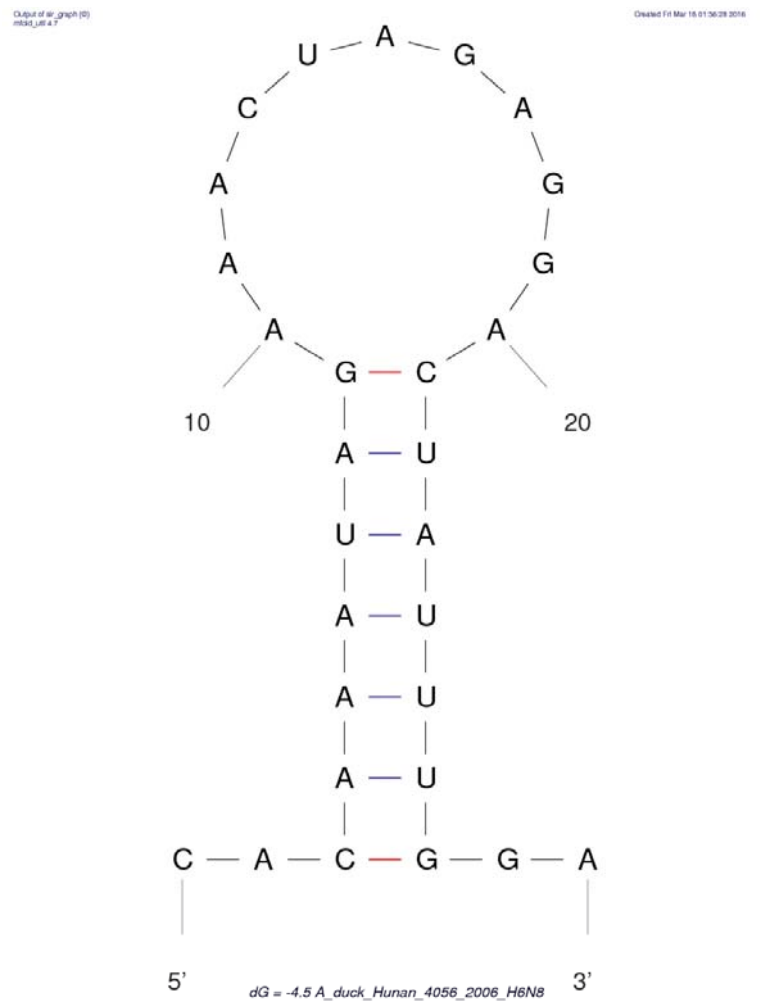

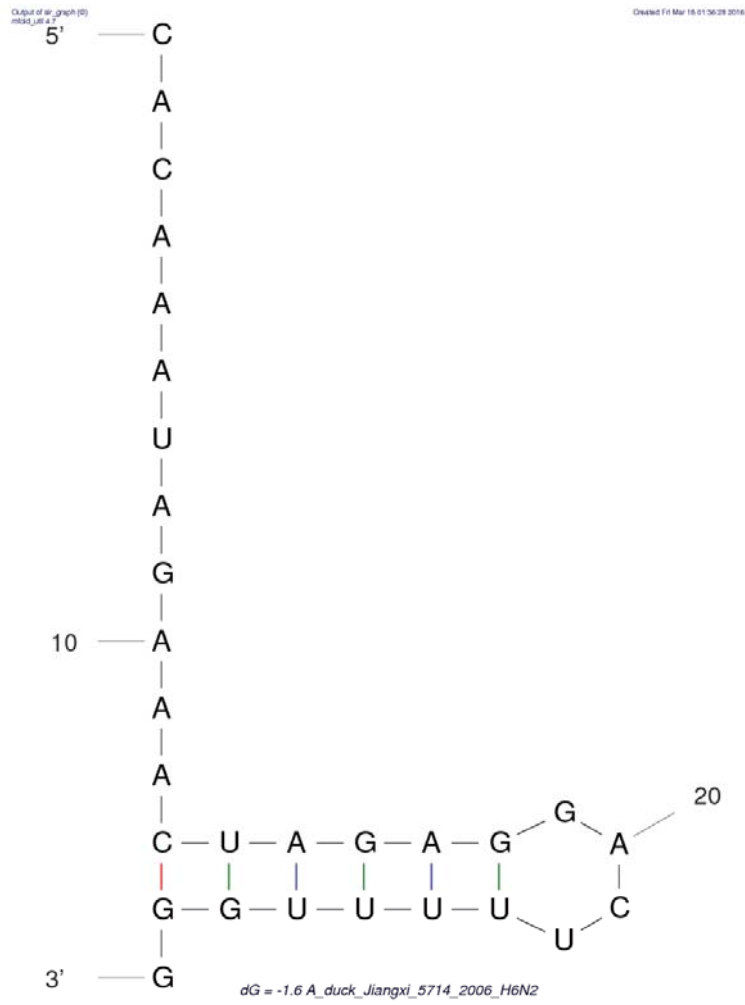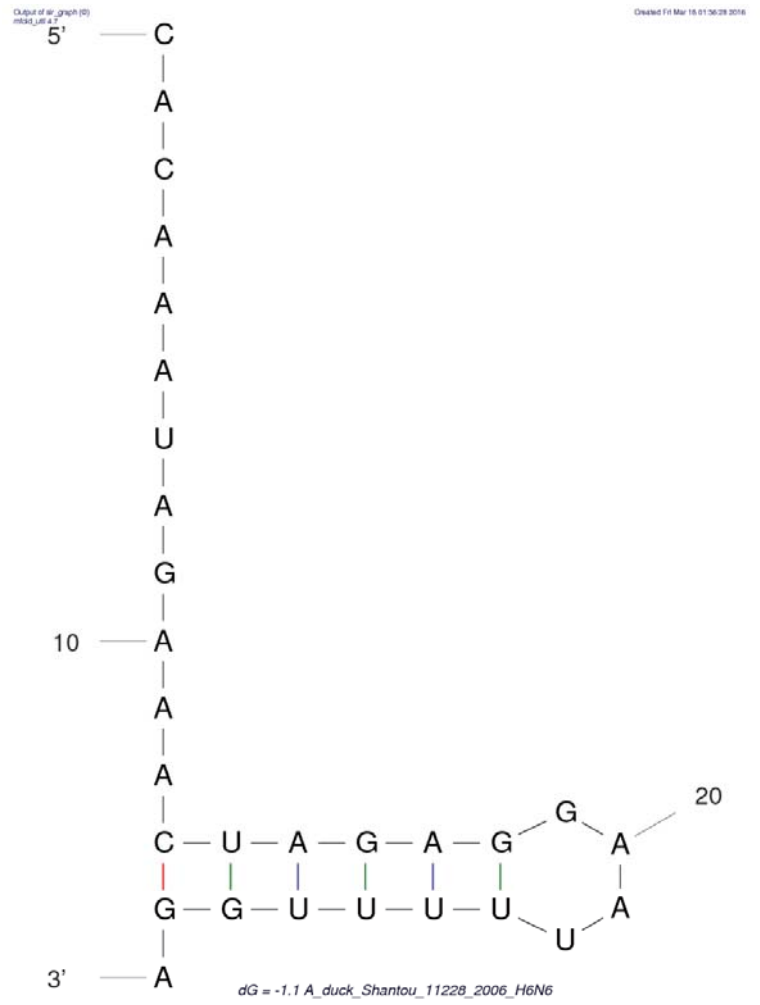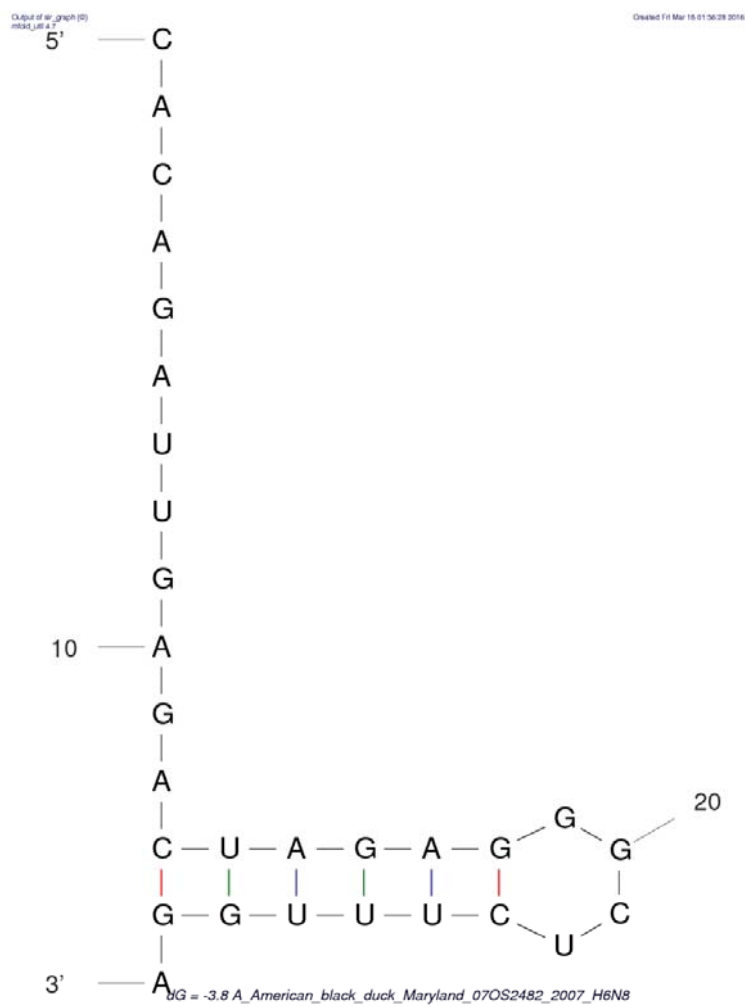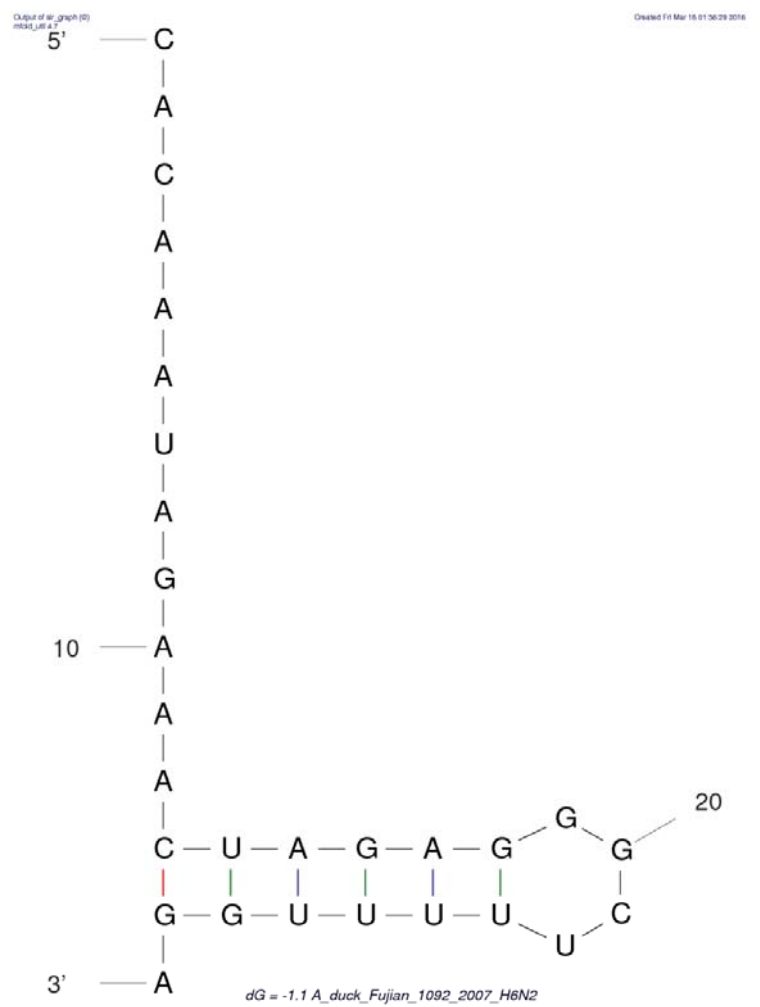

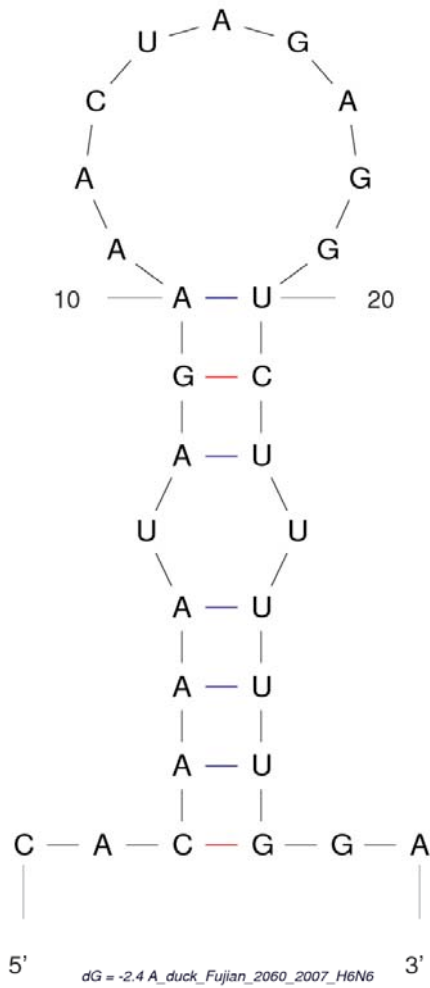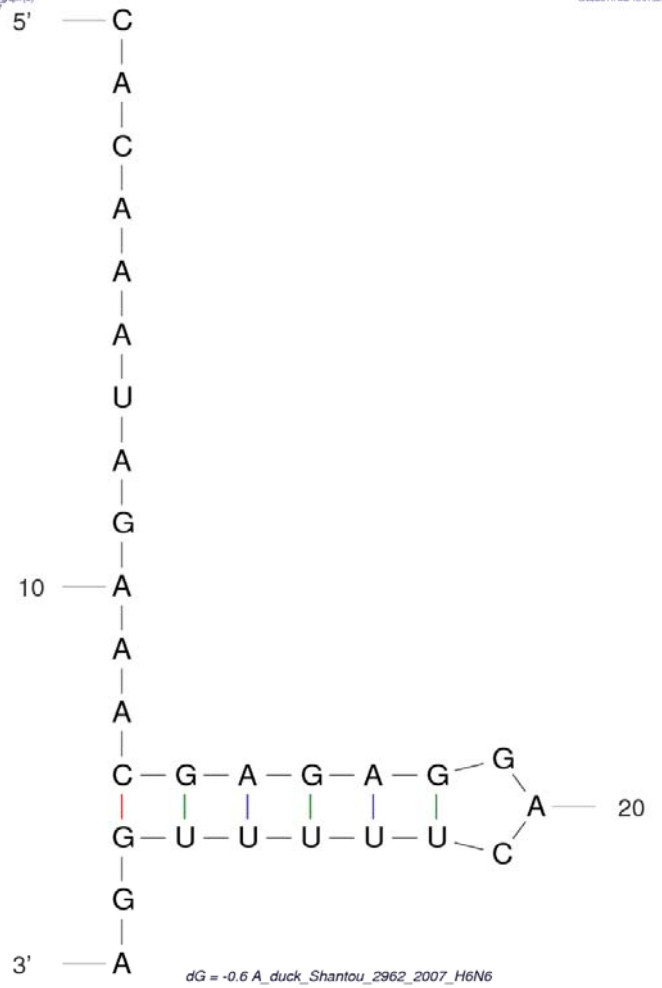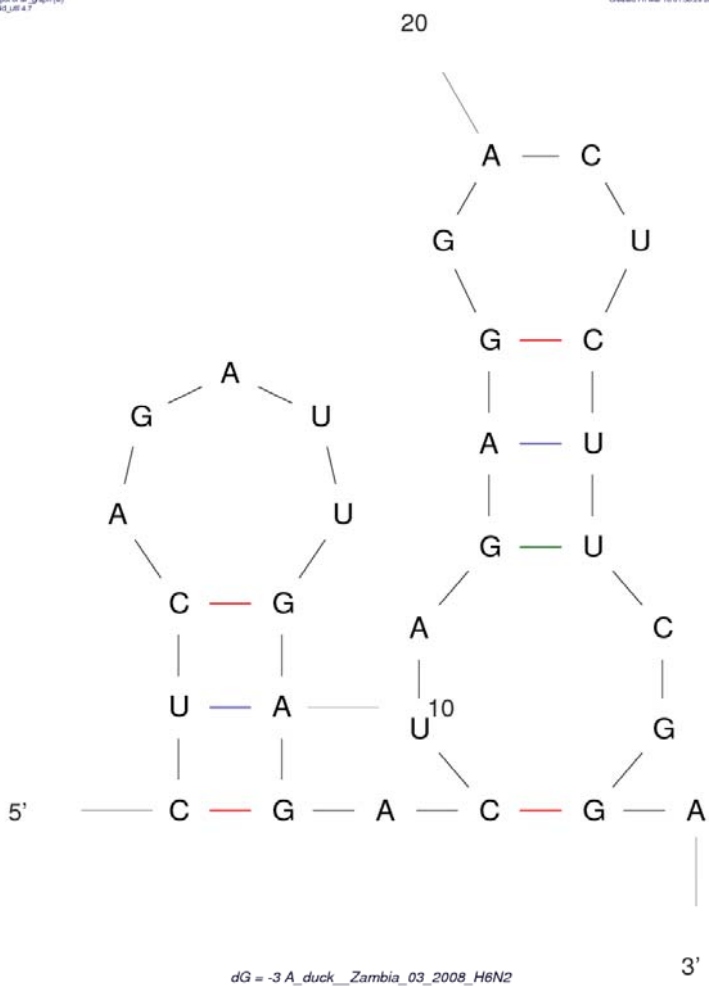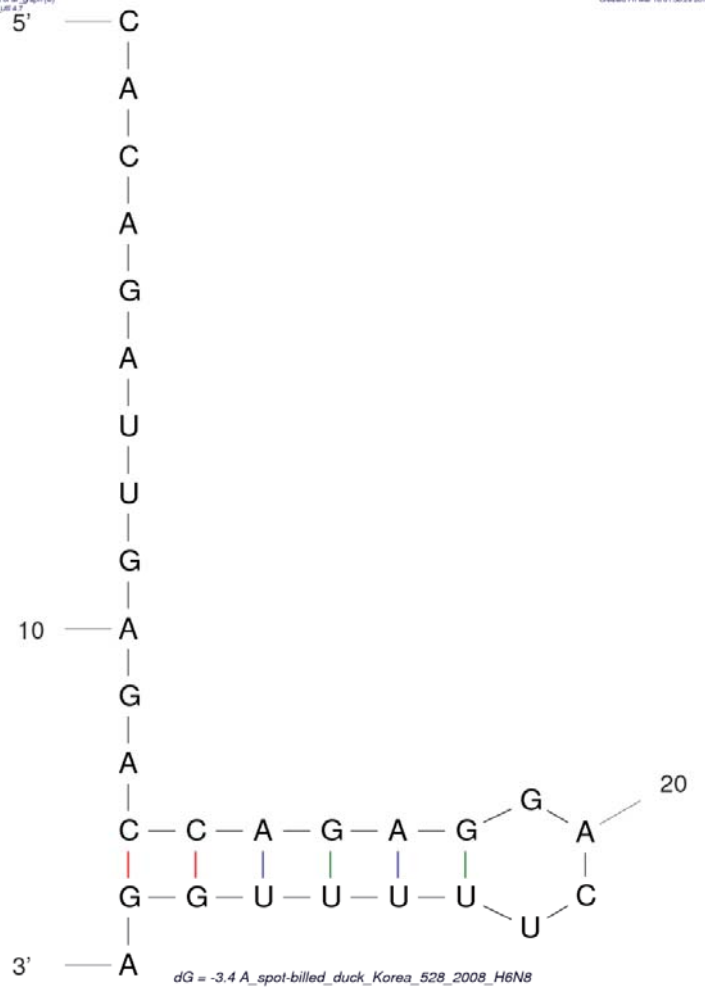

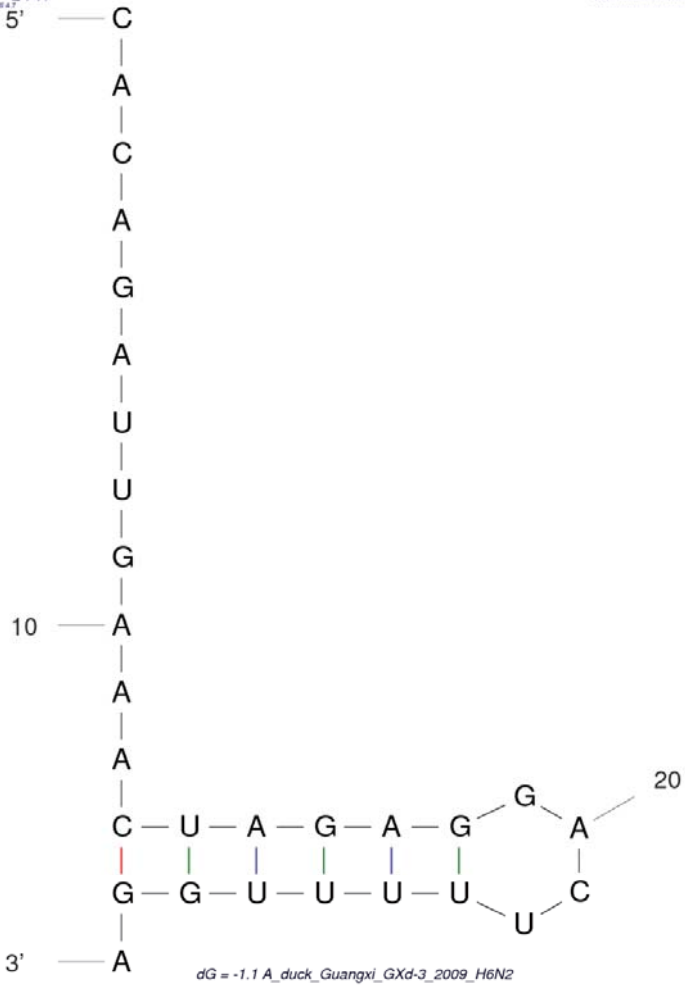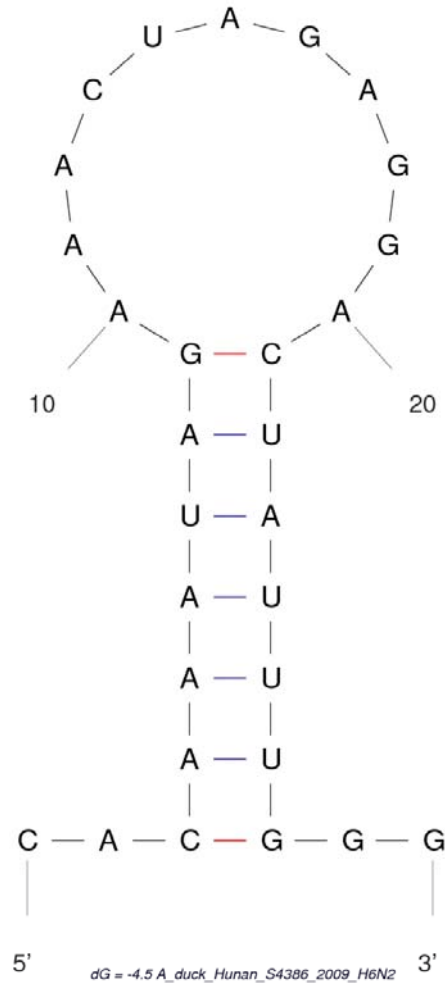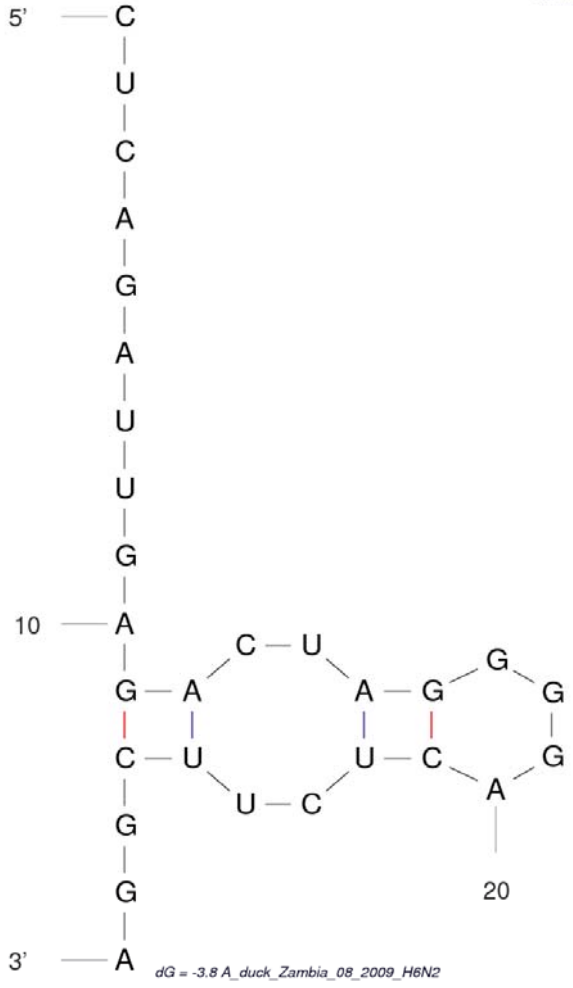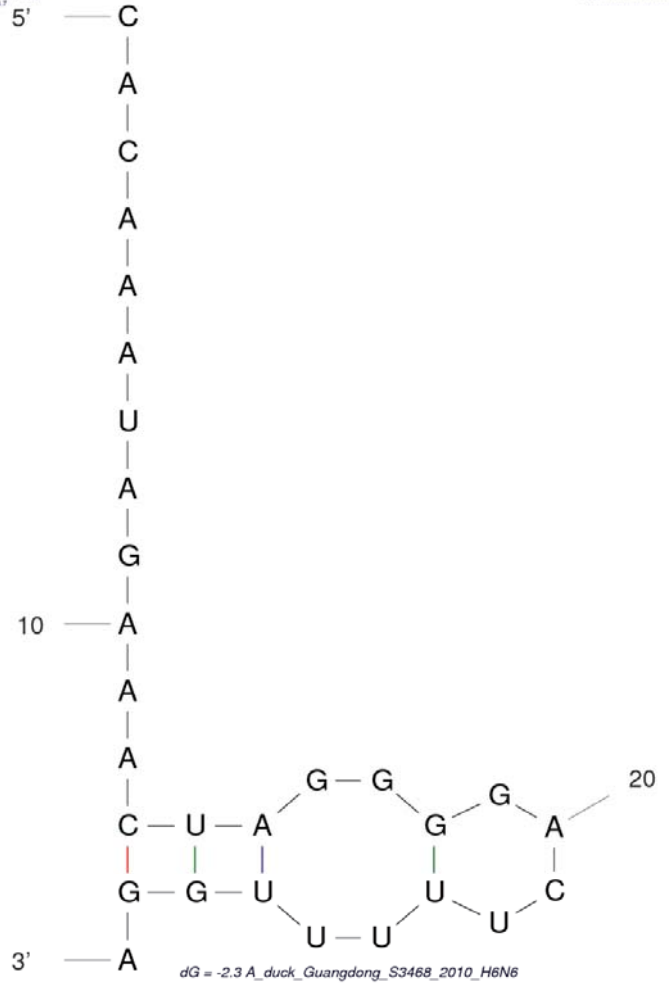

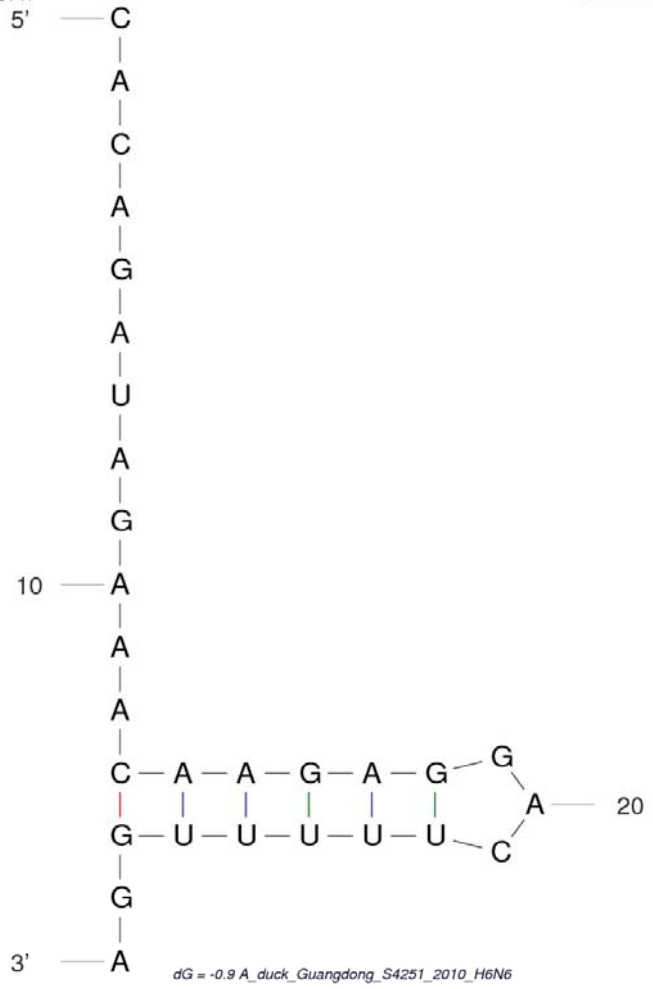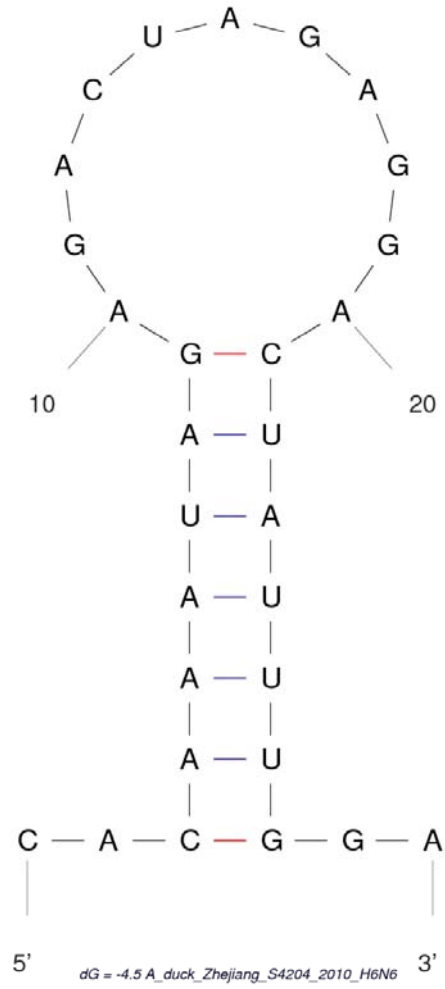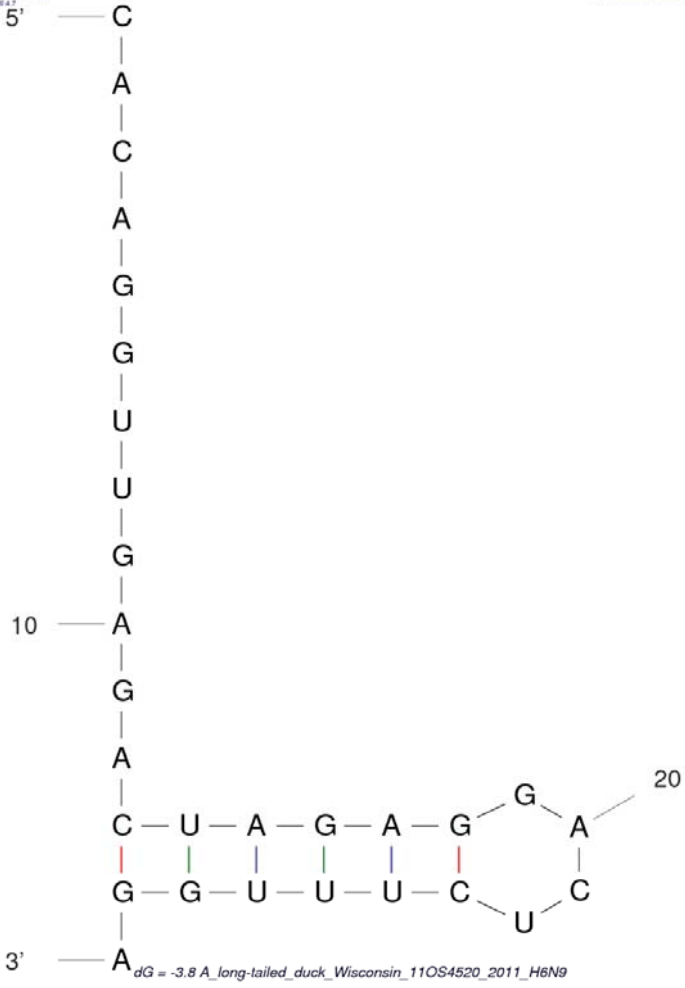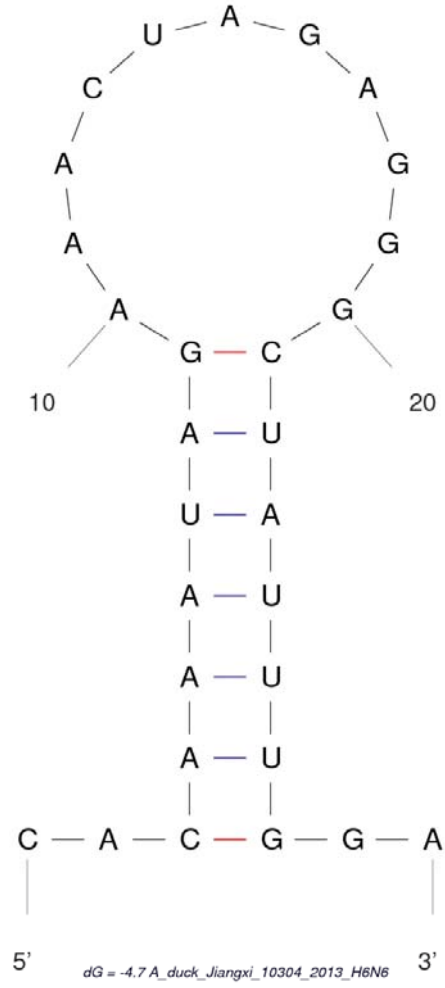



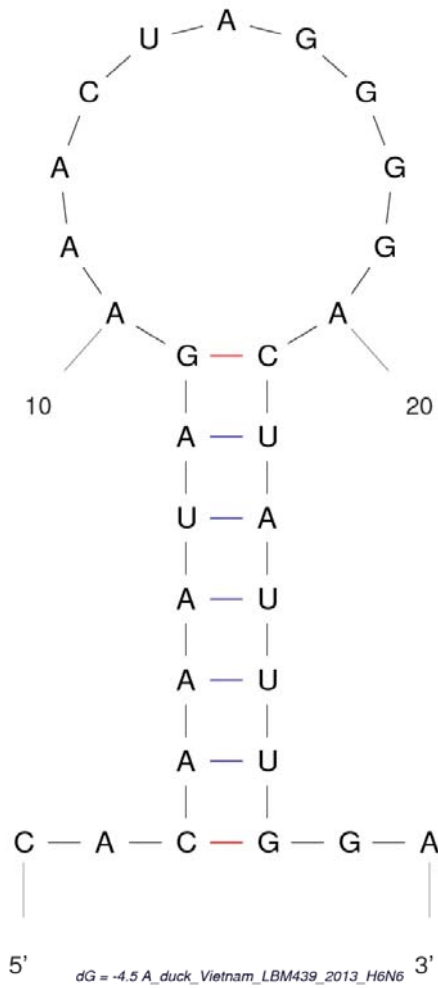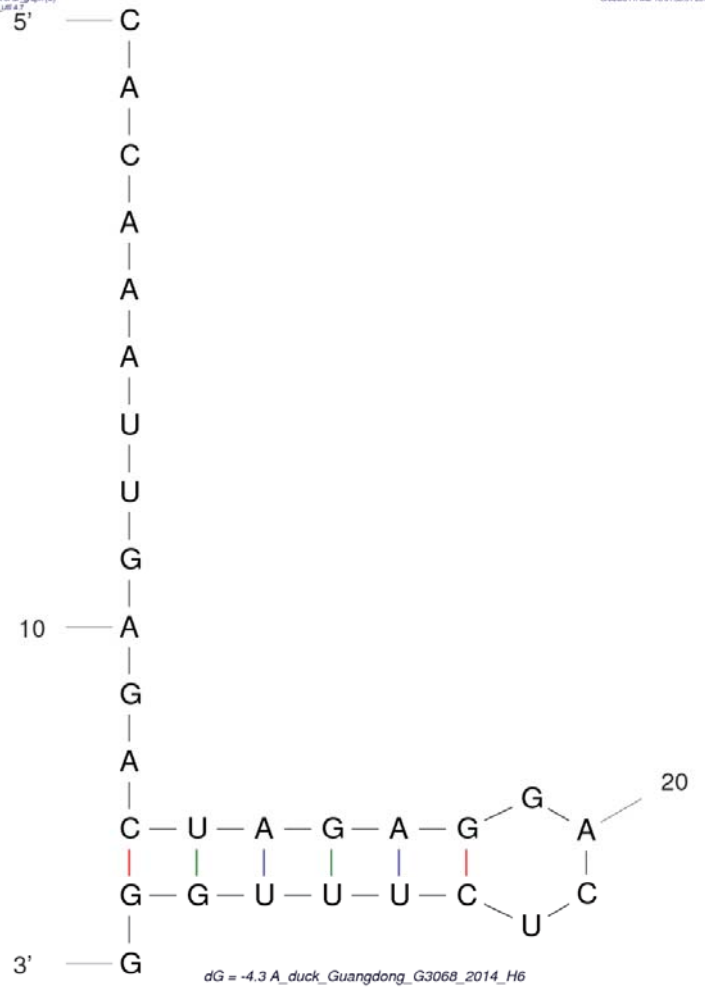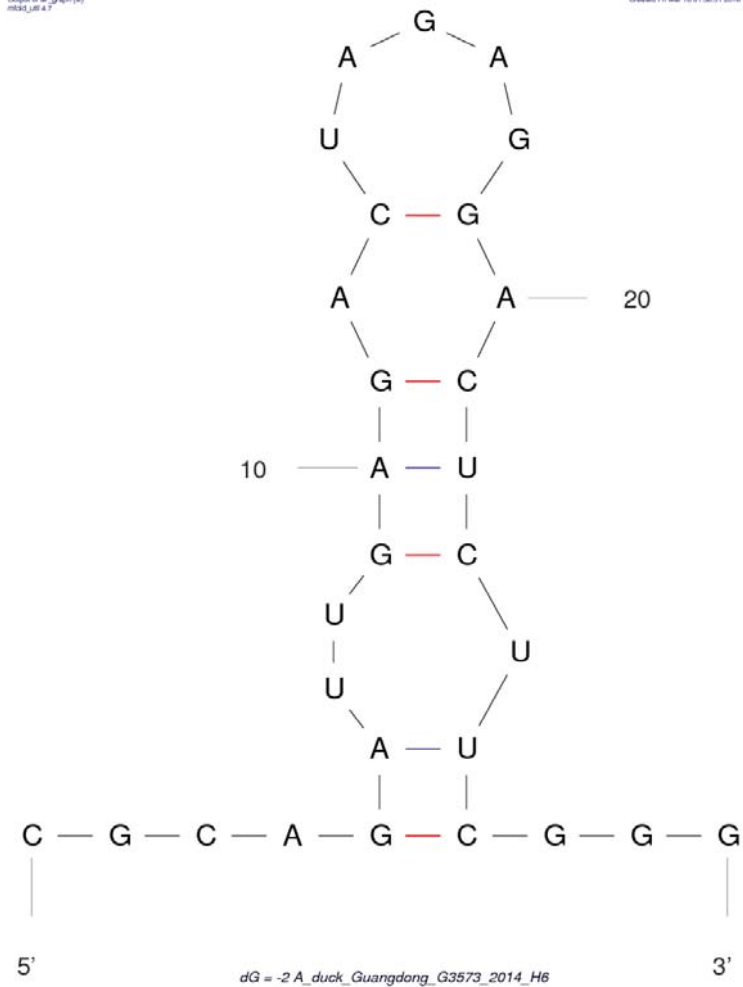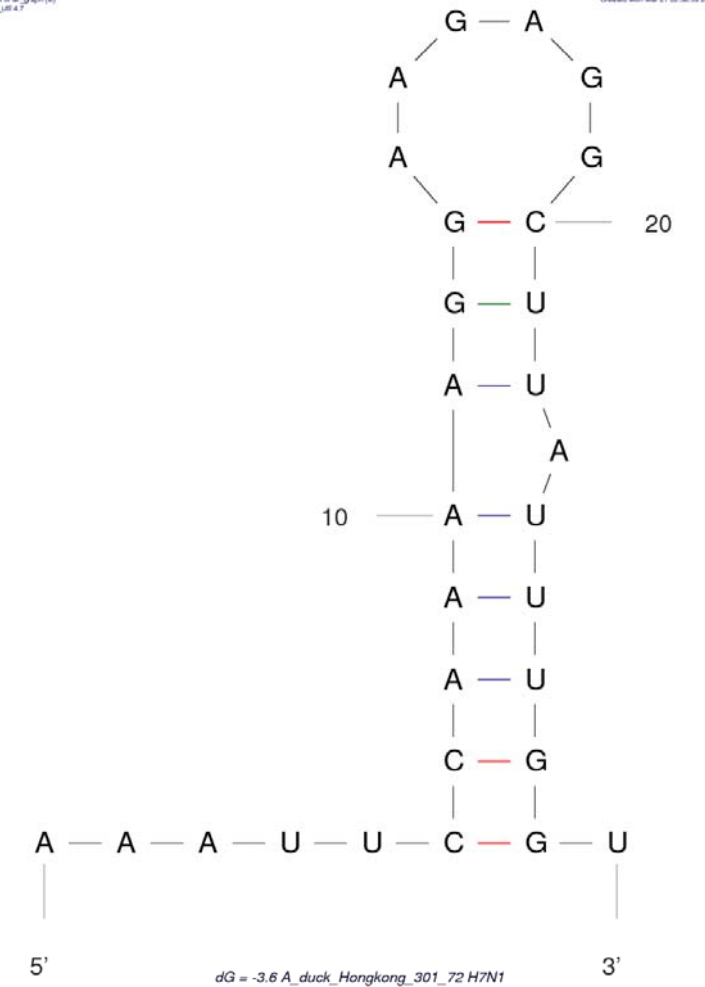

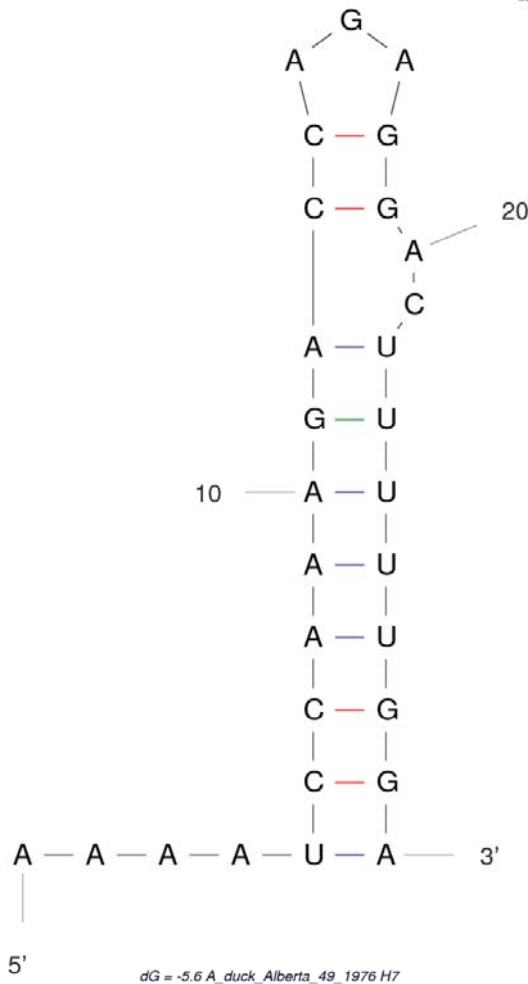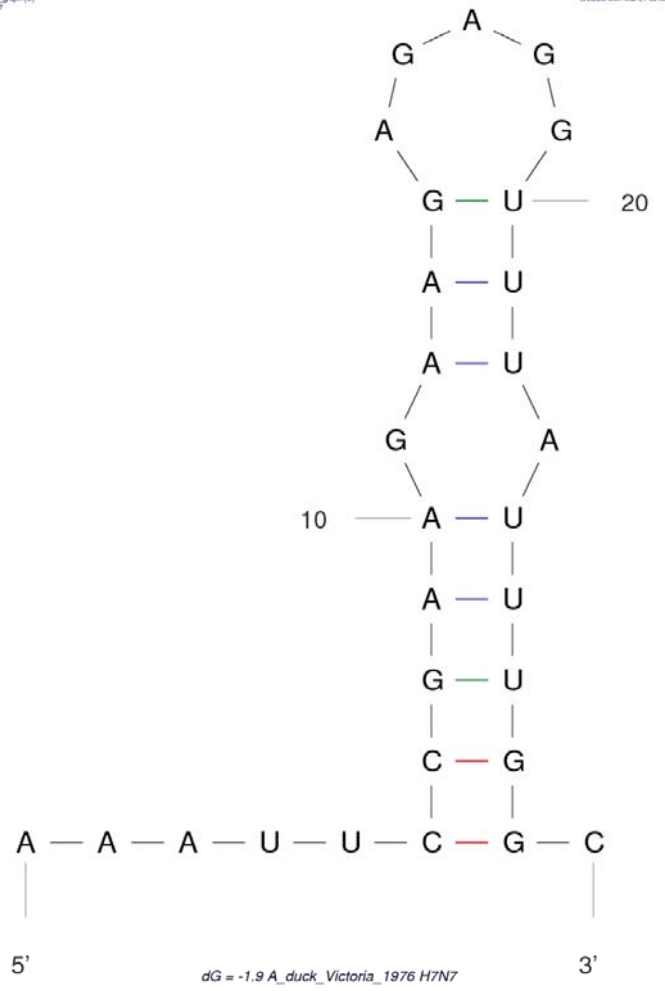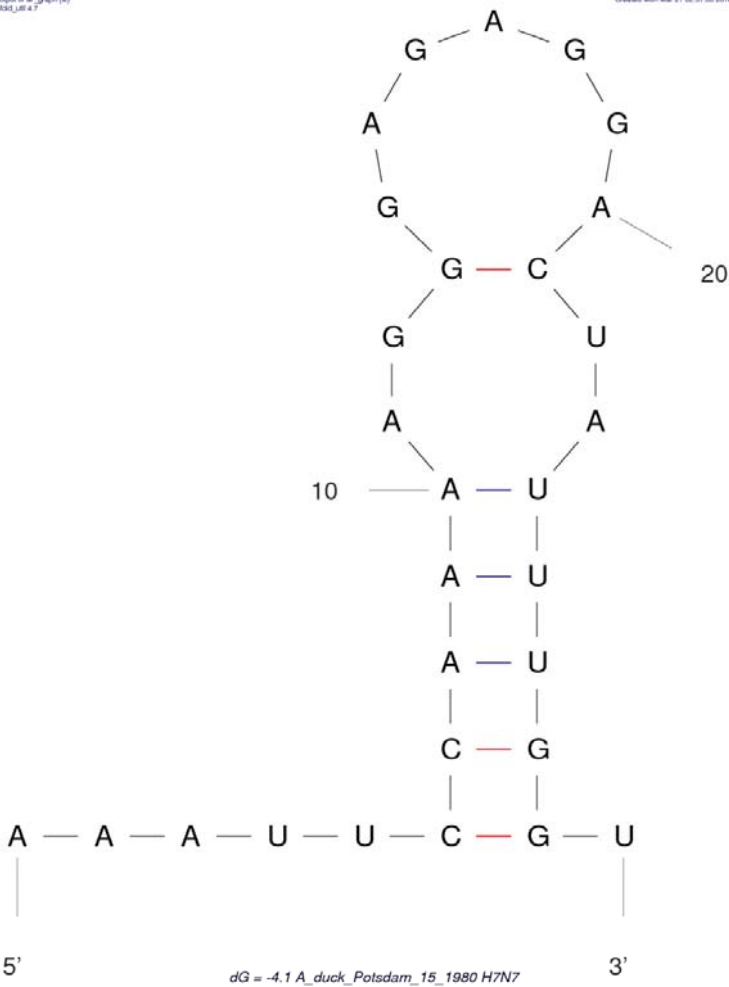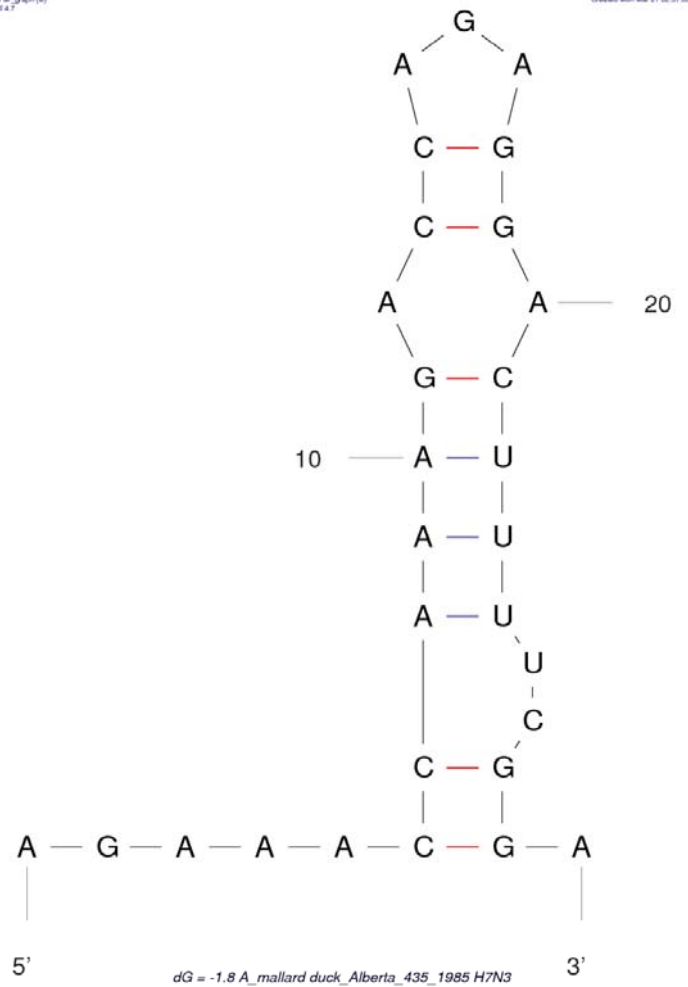

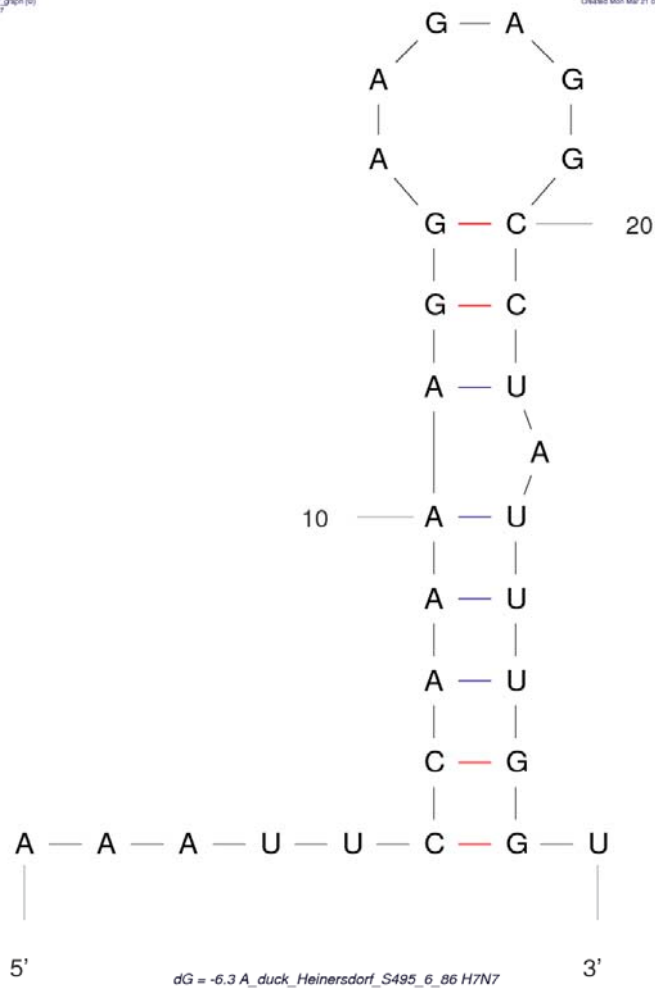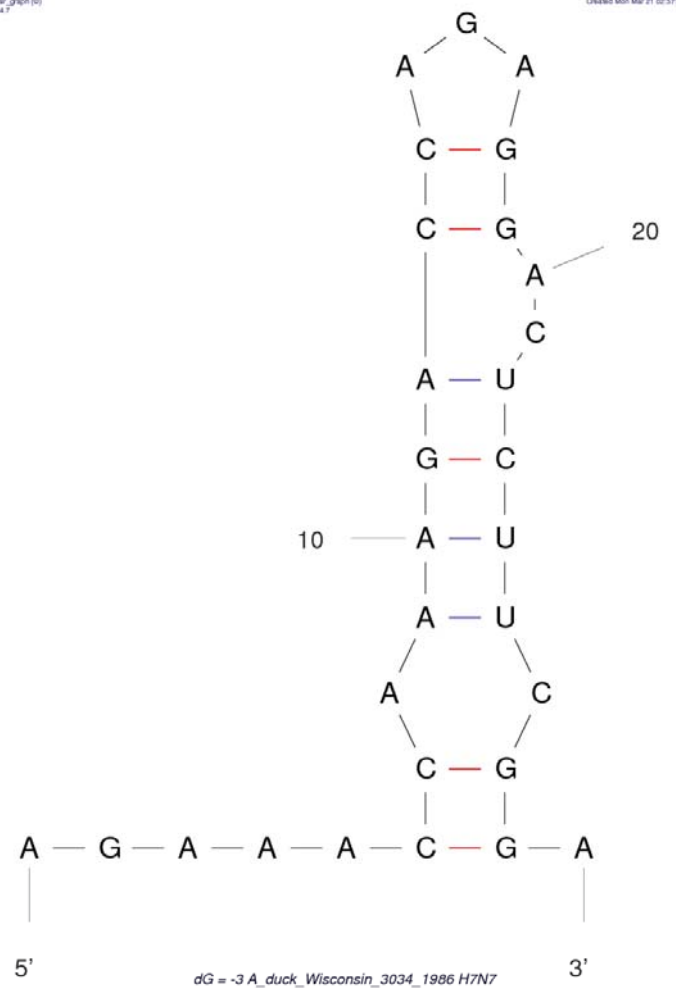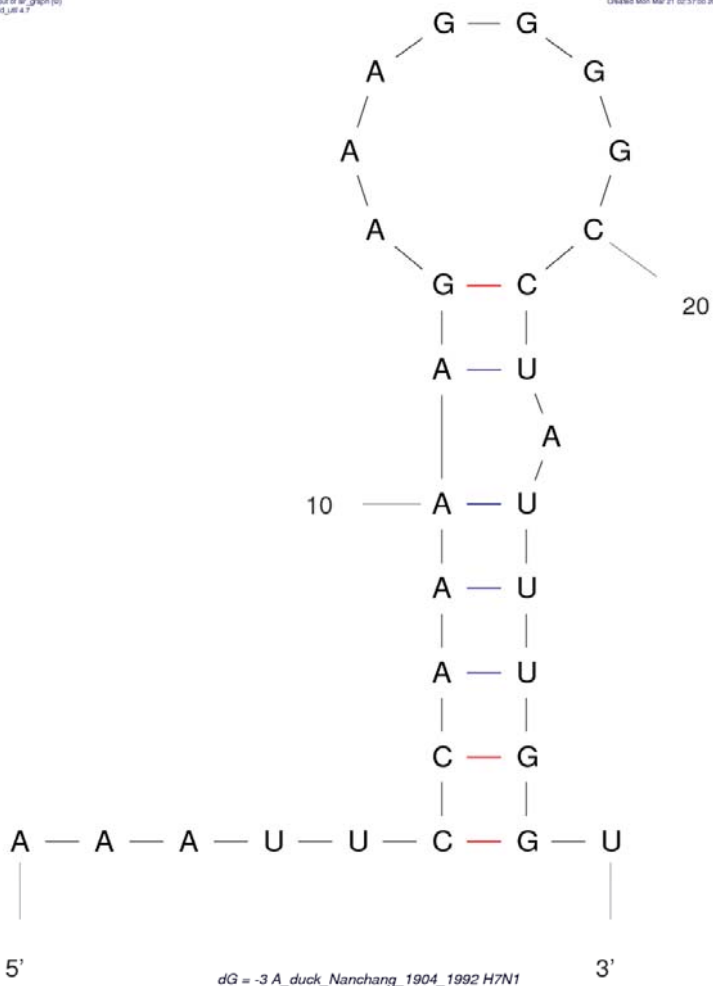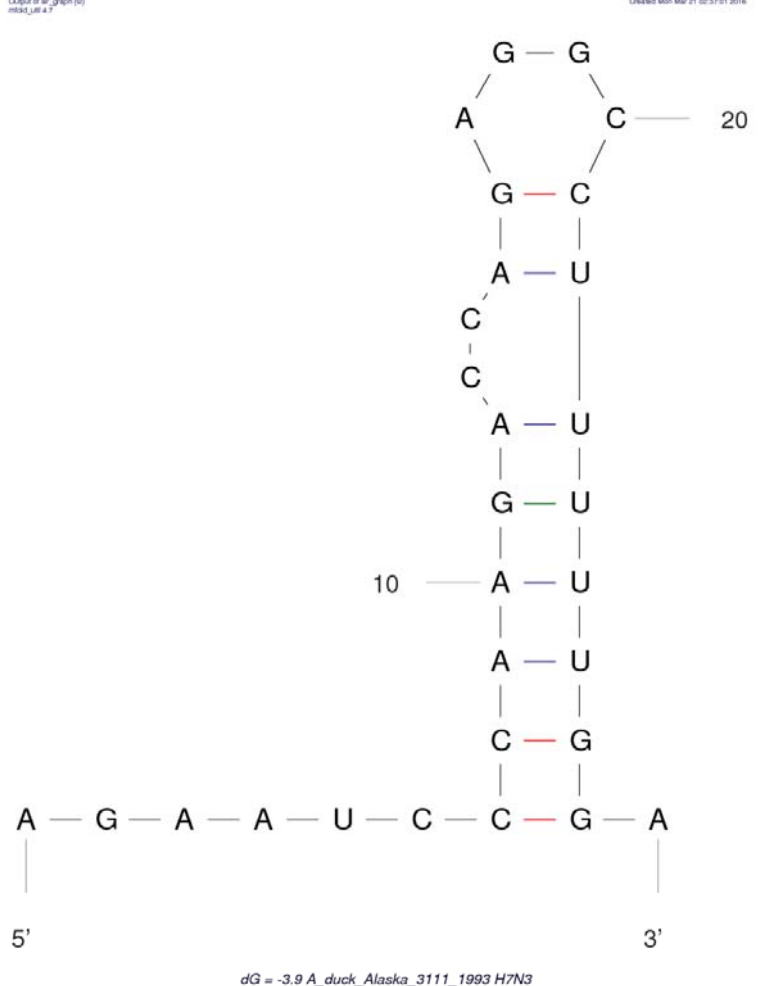

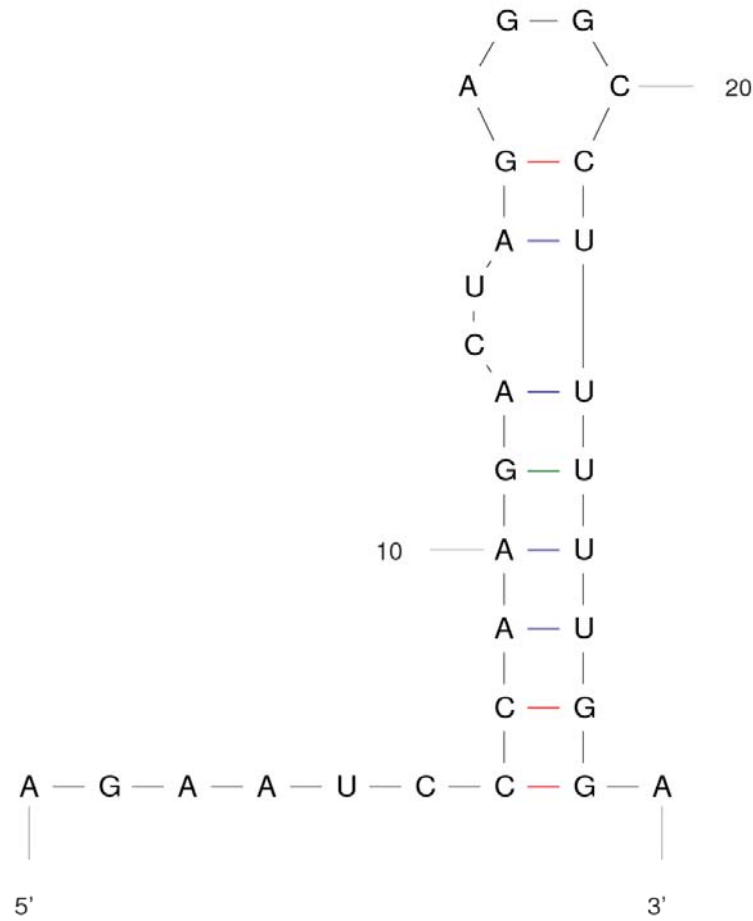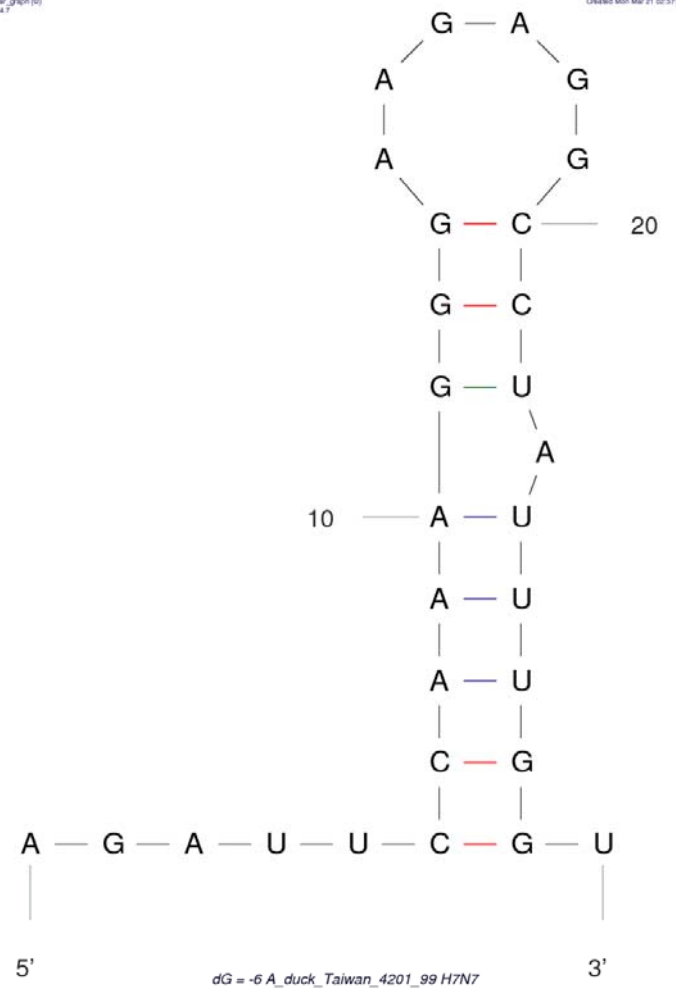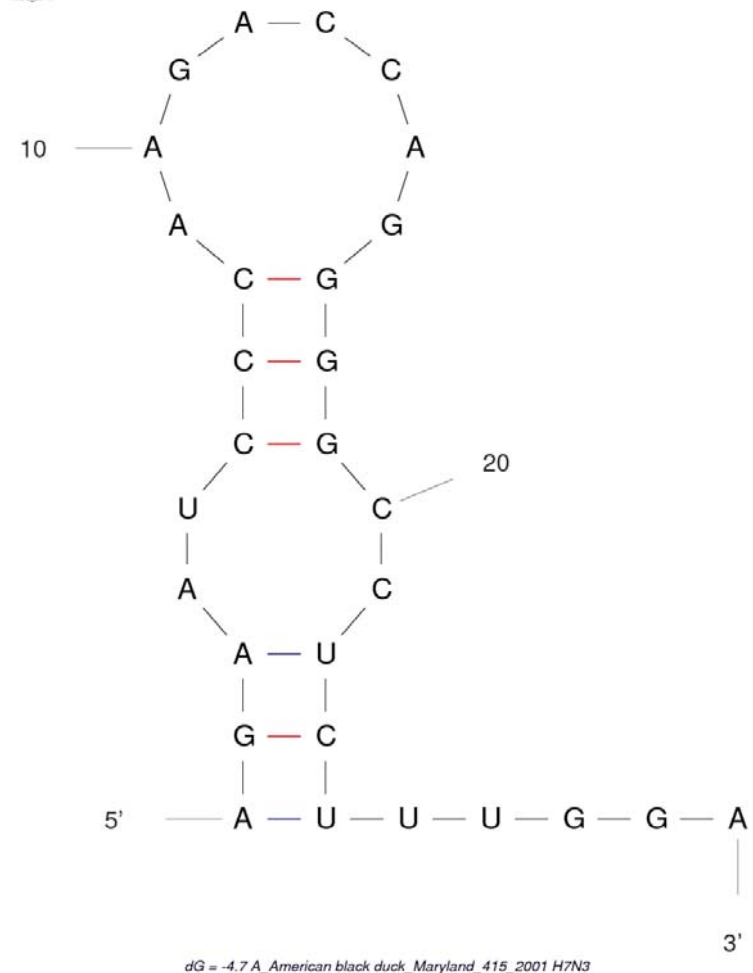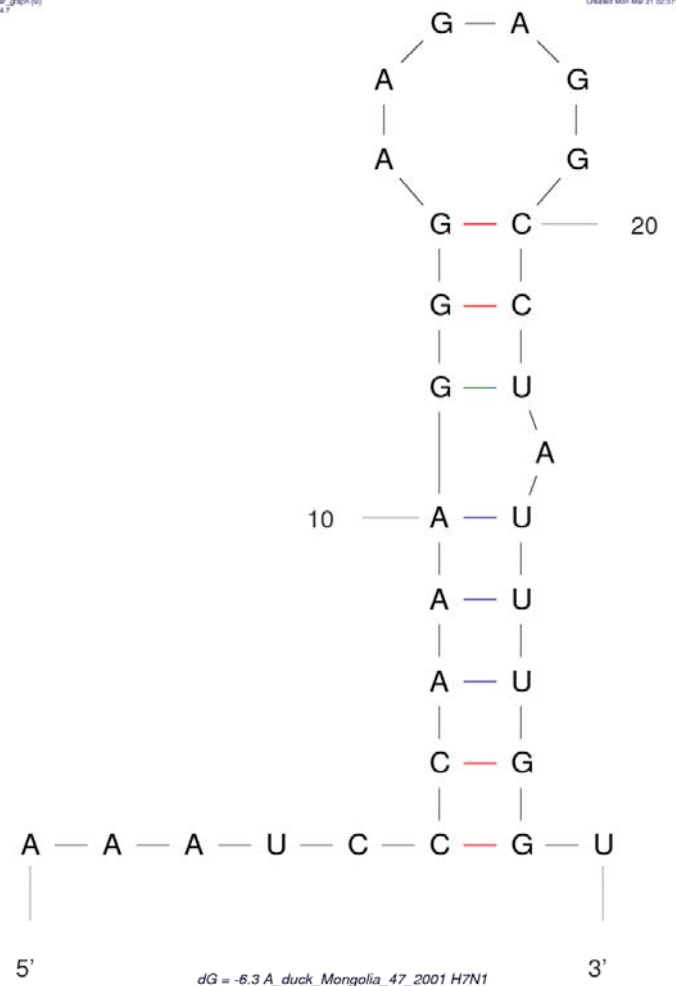

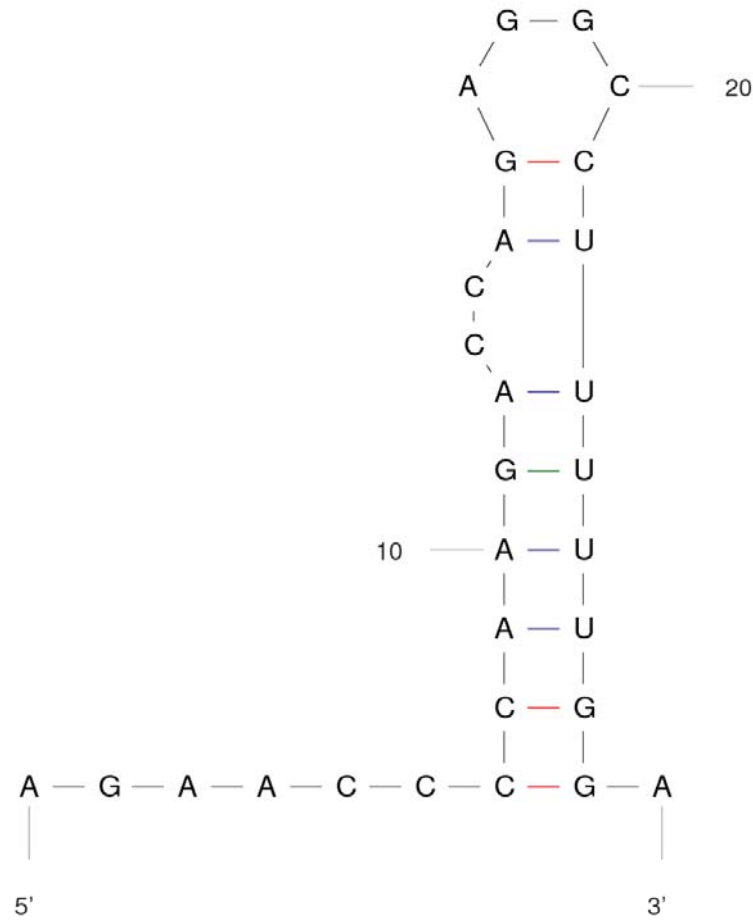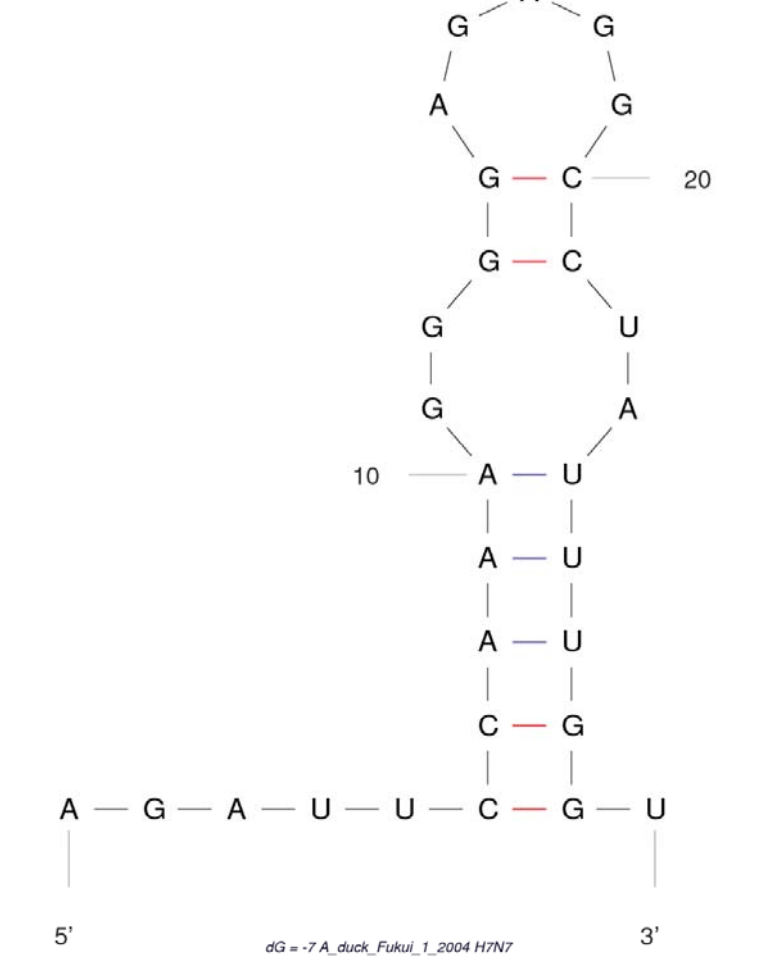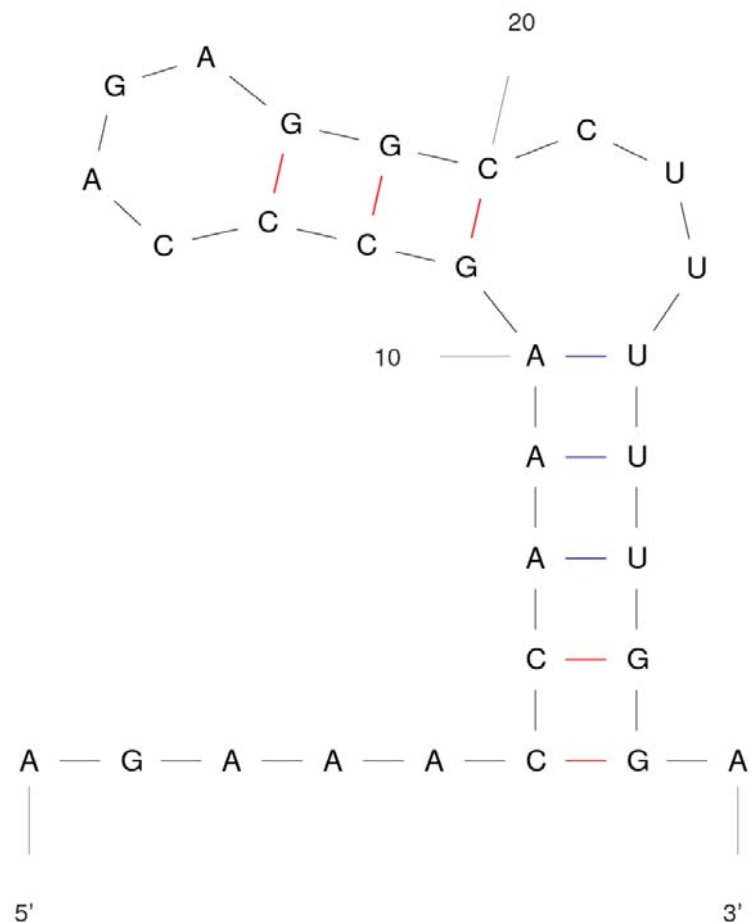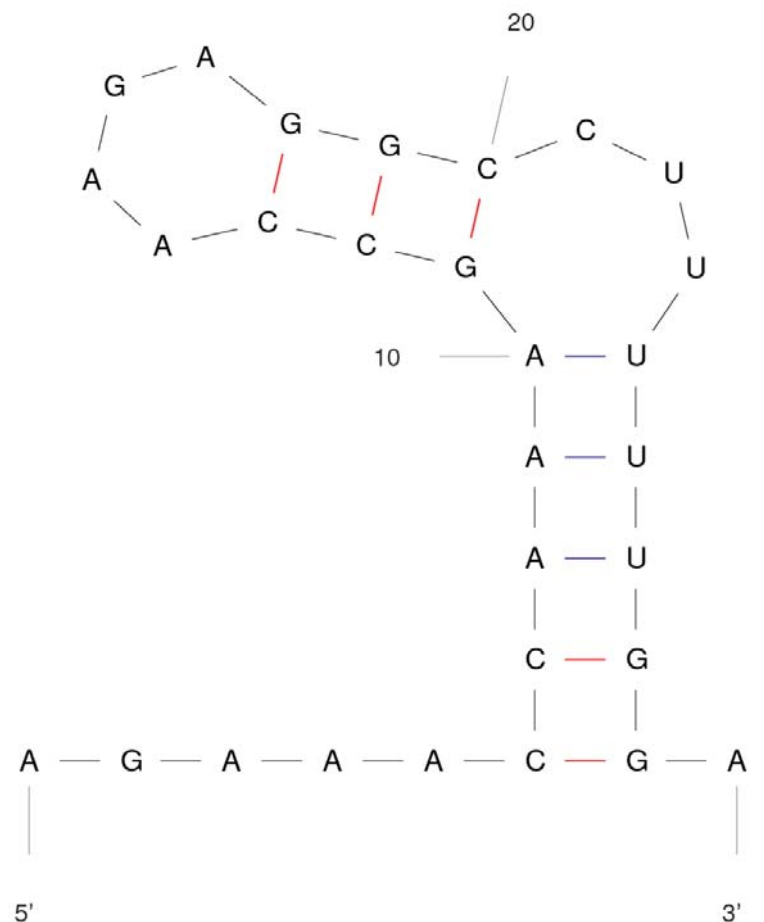

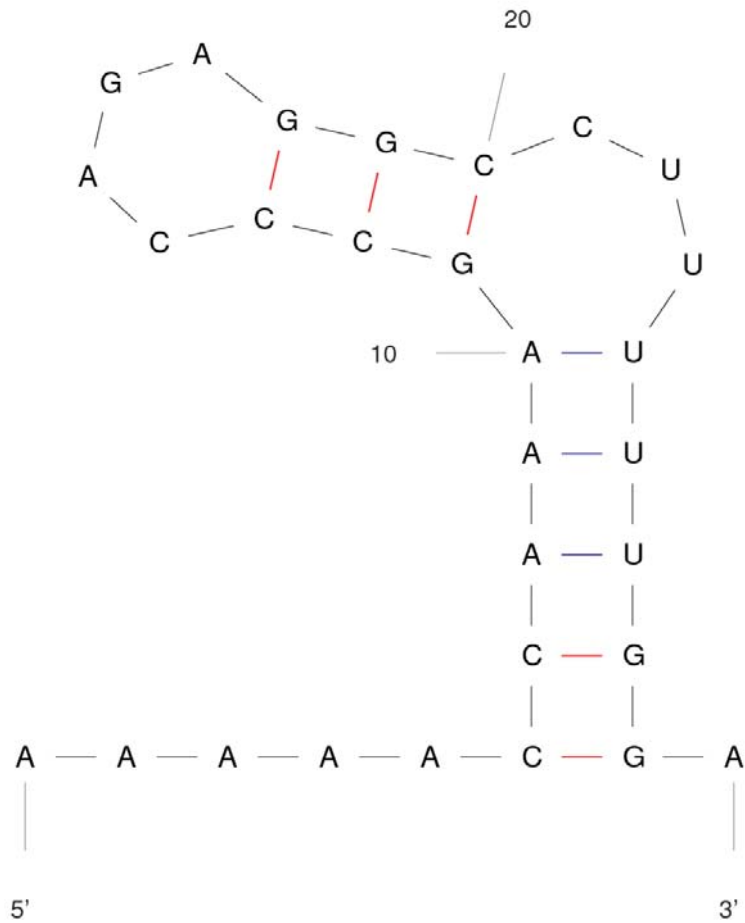

dG = -6.7 A\_Muscovy duck\_New York\_23165-13\_2005 H7N2

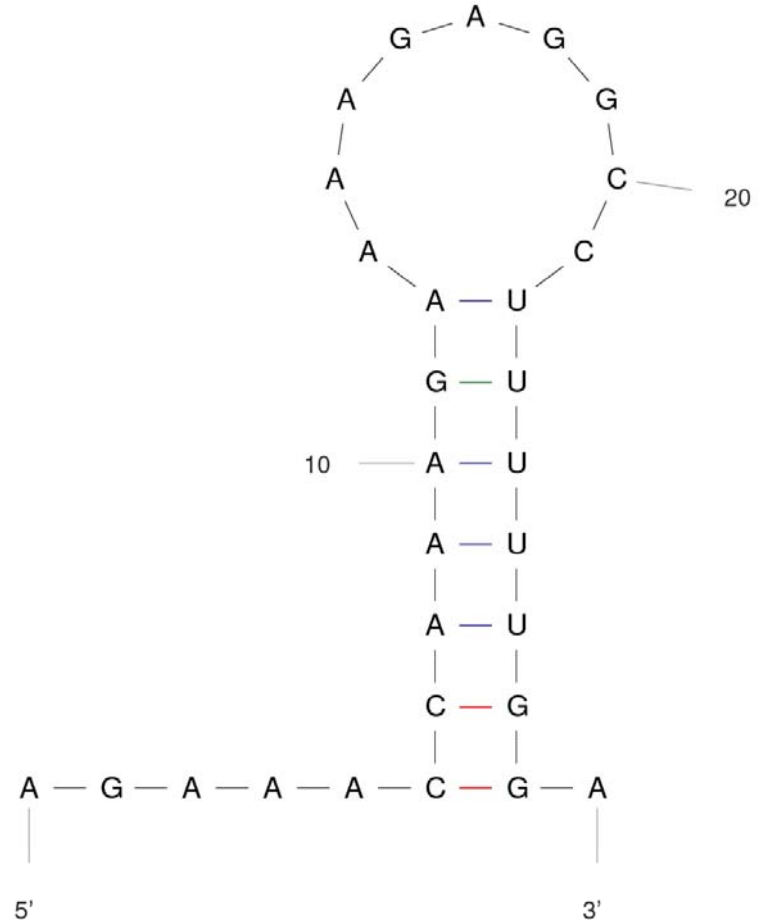

dG = -4.3 A\_duck\_New York\_21211-6\_2005 H7N2

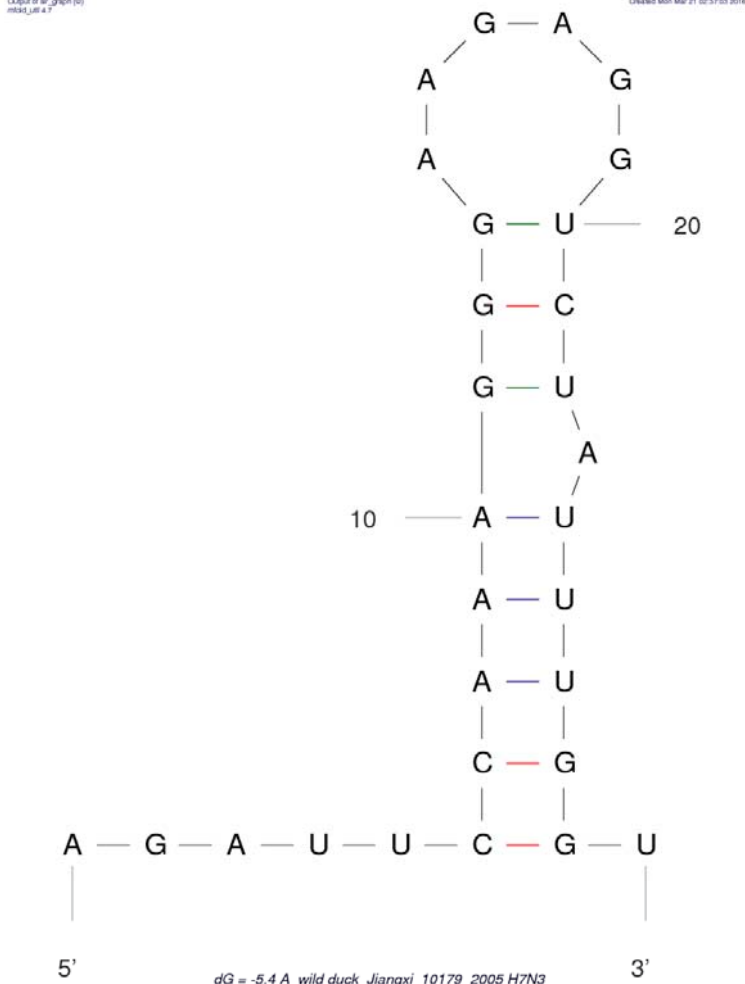

dG = -5.4 A\_wild duck\_Jiangxi\_10179\_2005 H7N3

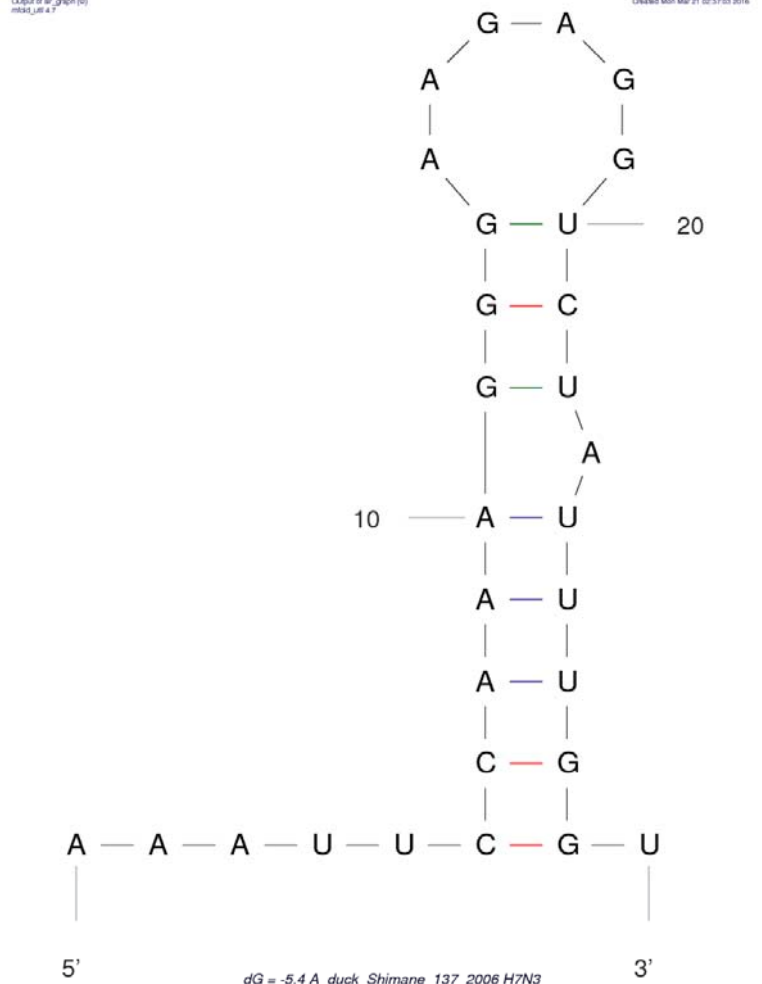

dG = -5.4 A\_duck\_Shimane\_137\_2006 H7N3

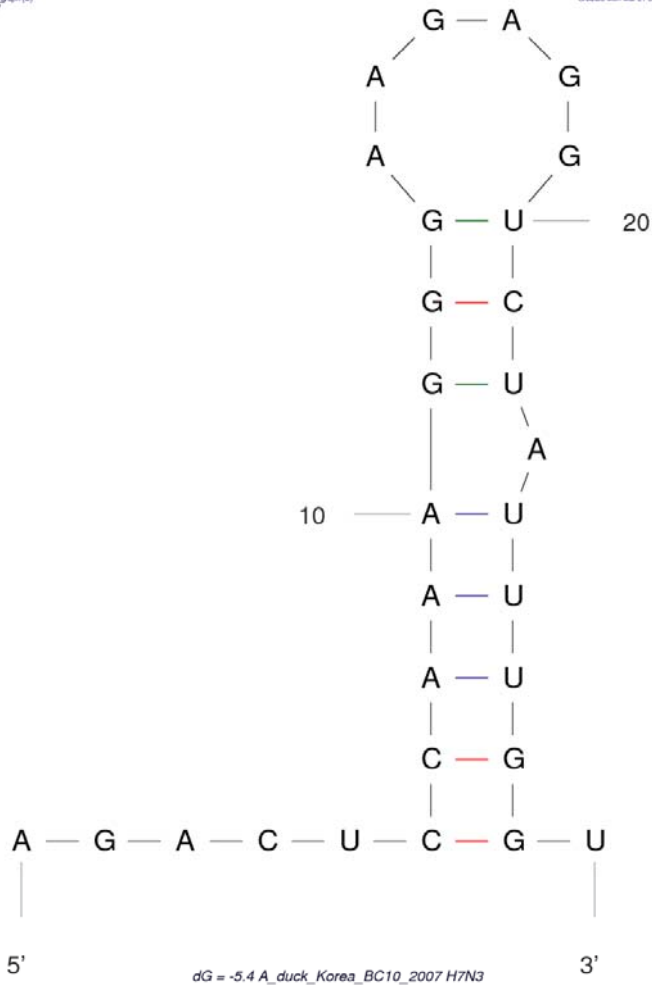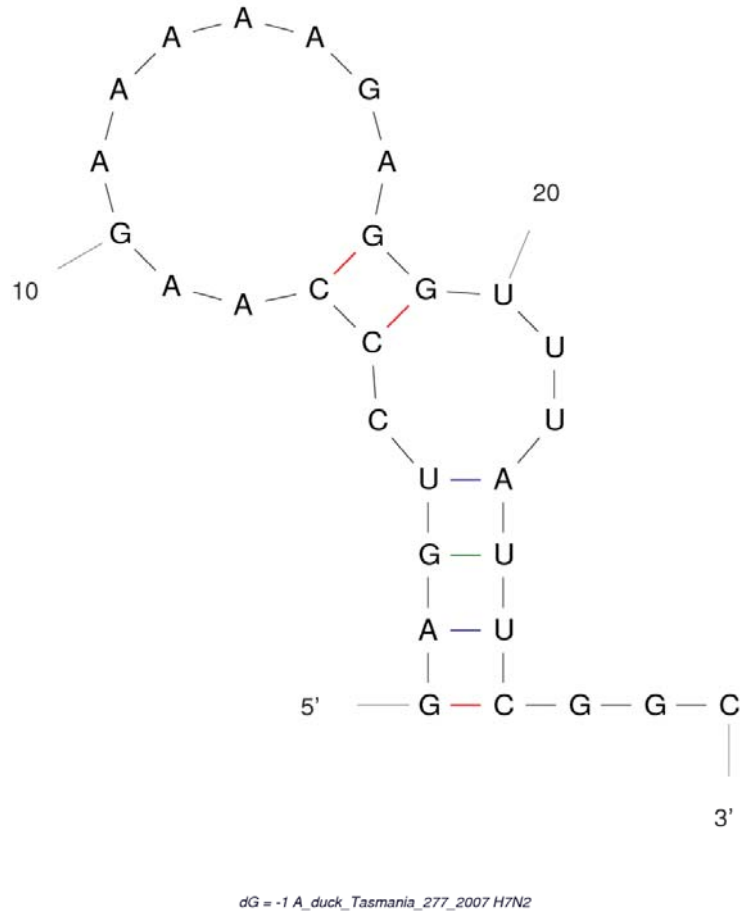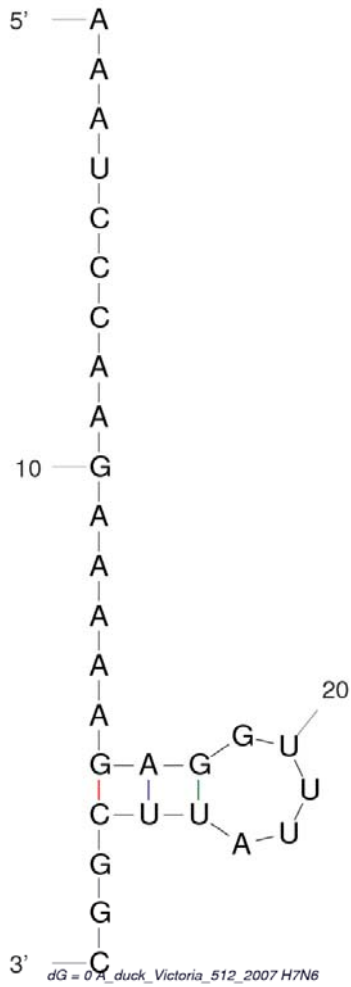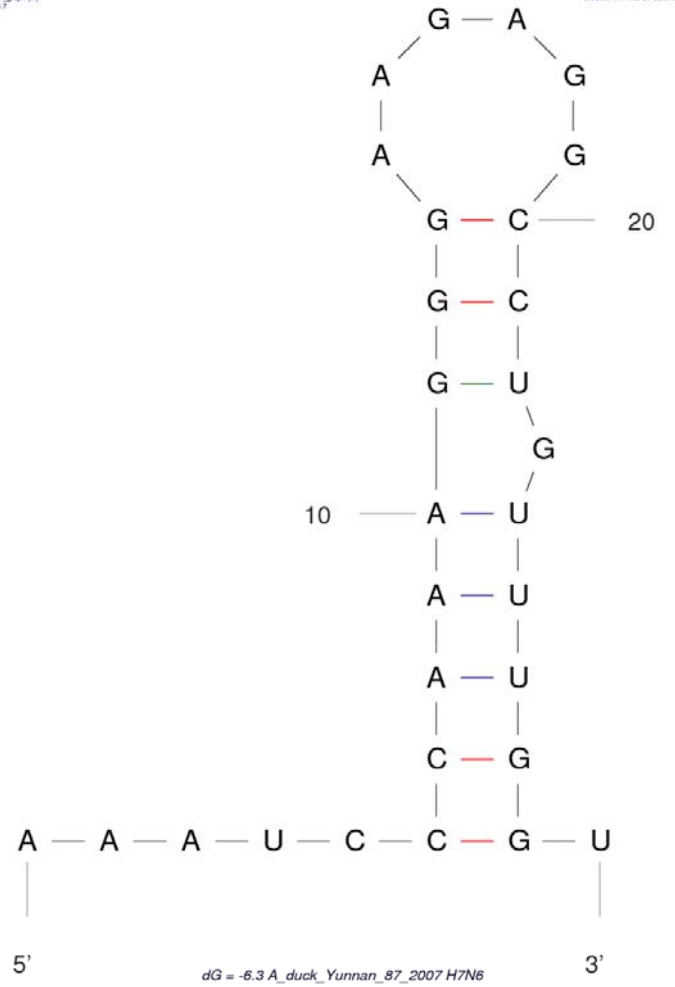

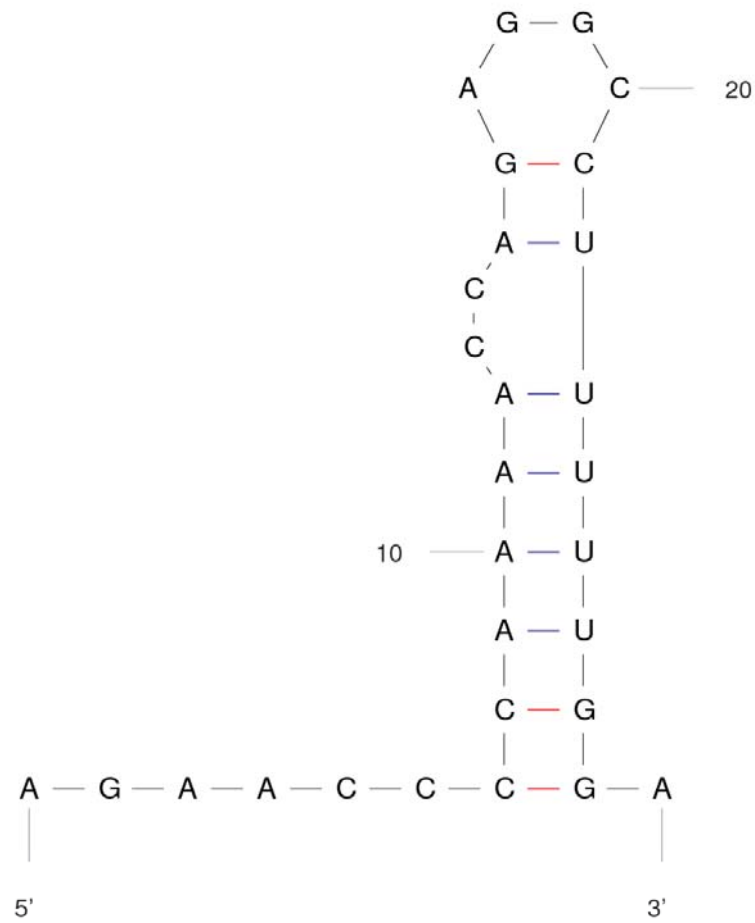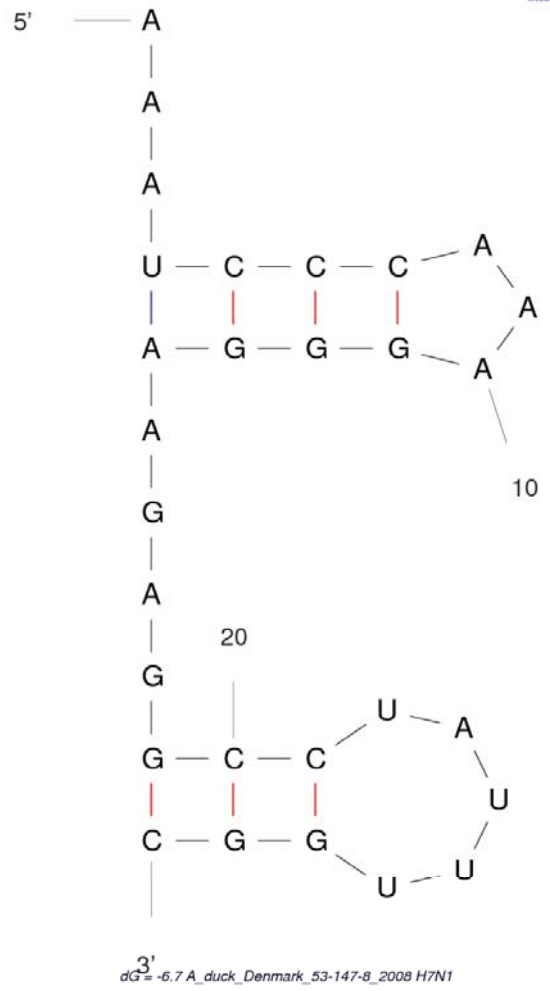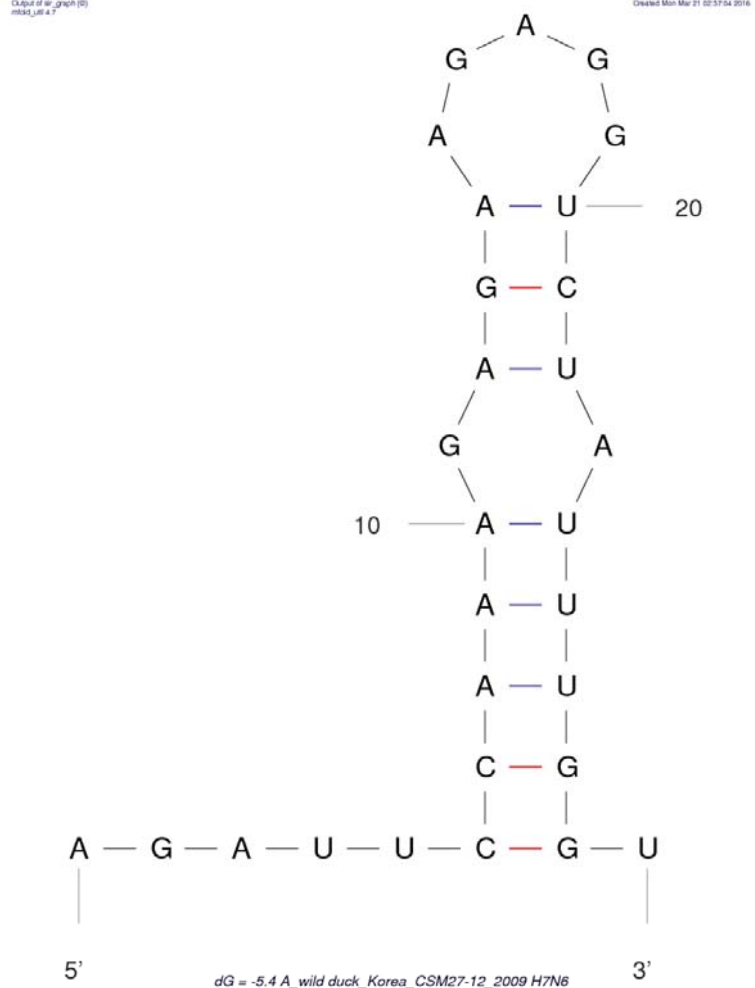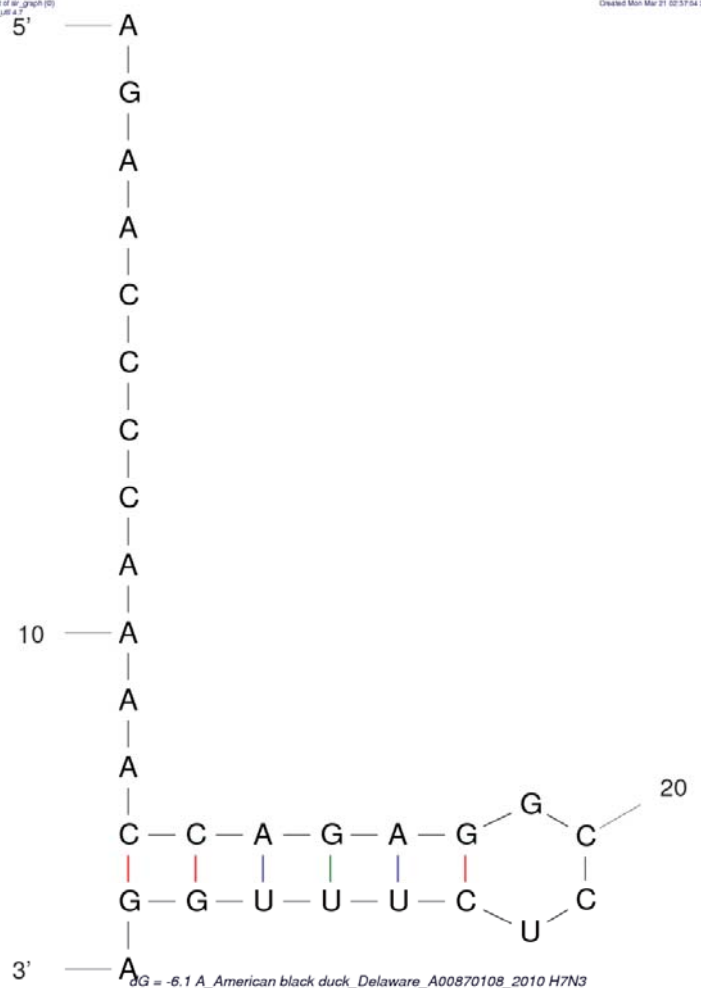



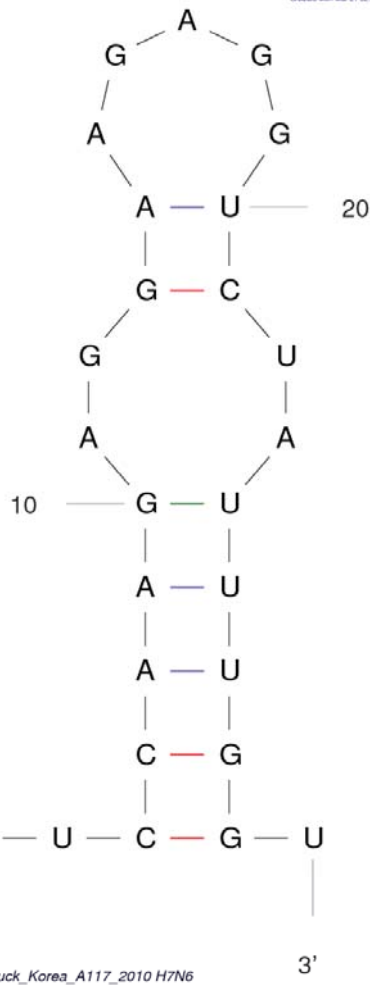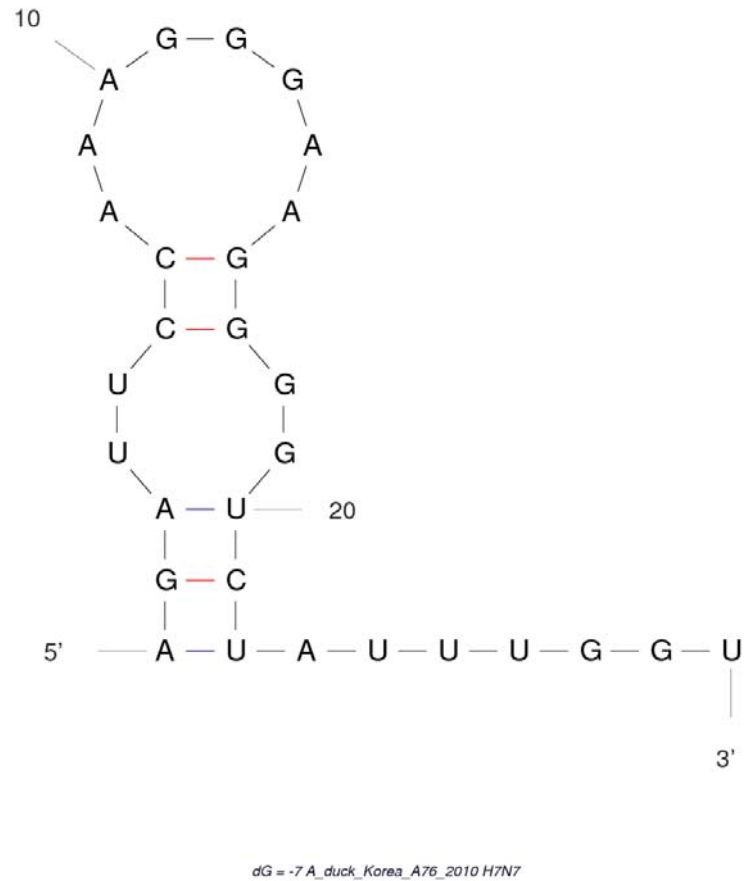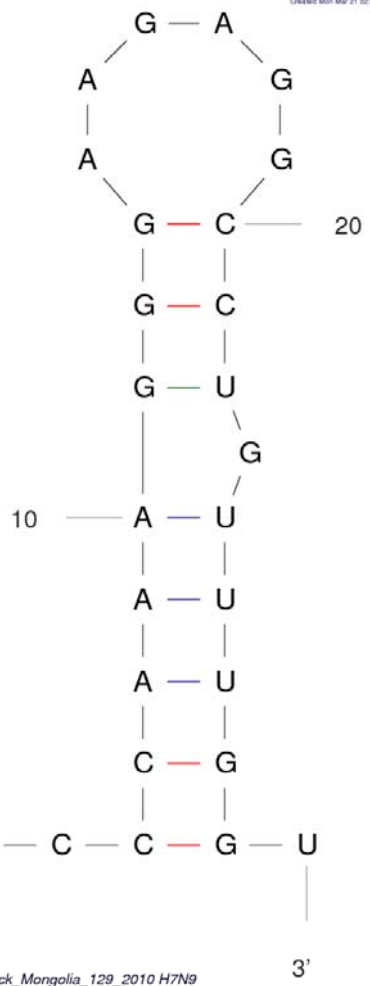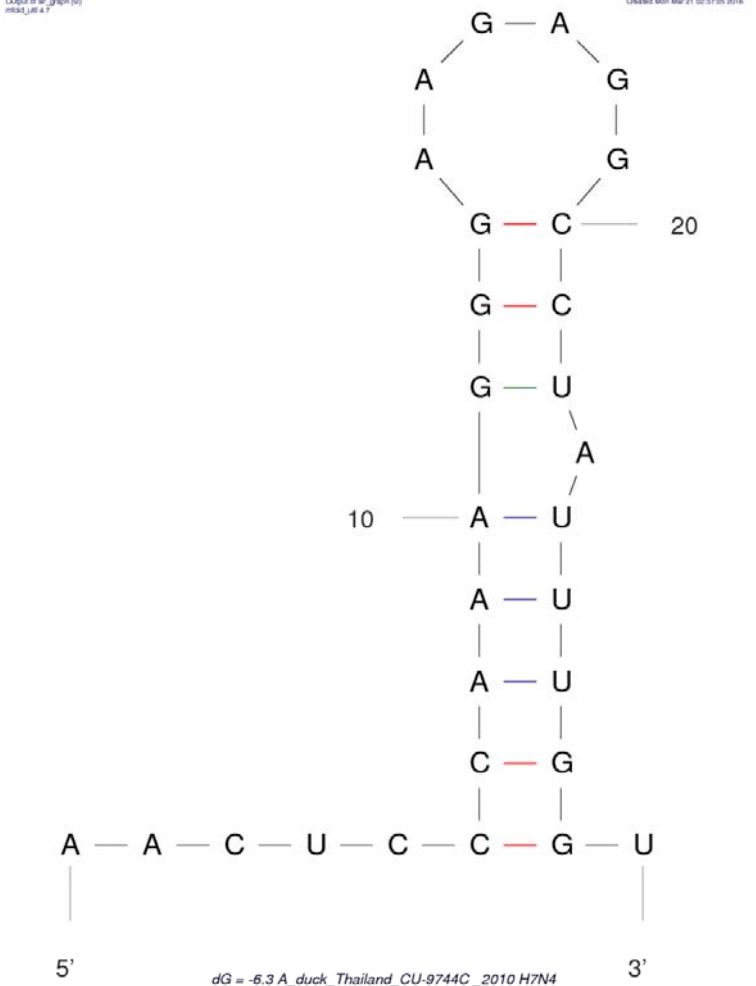

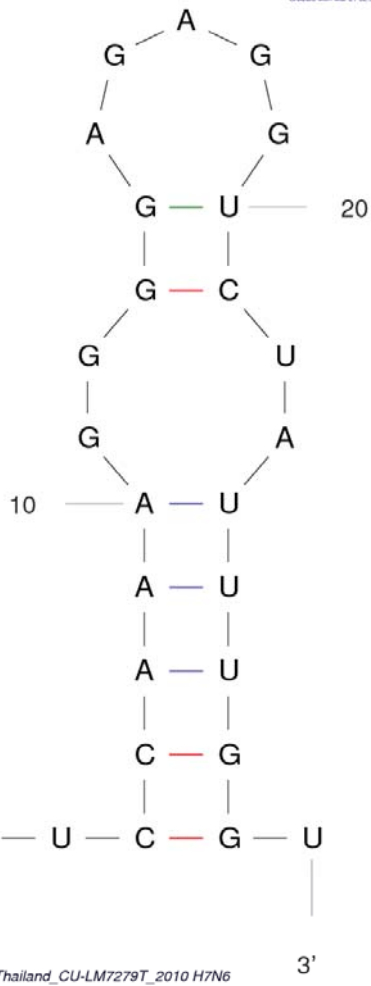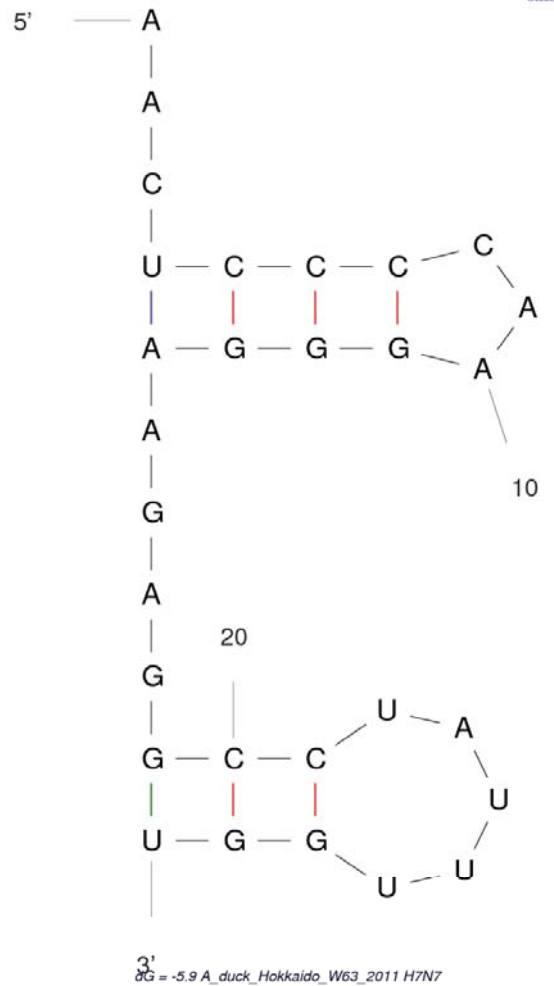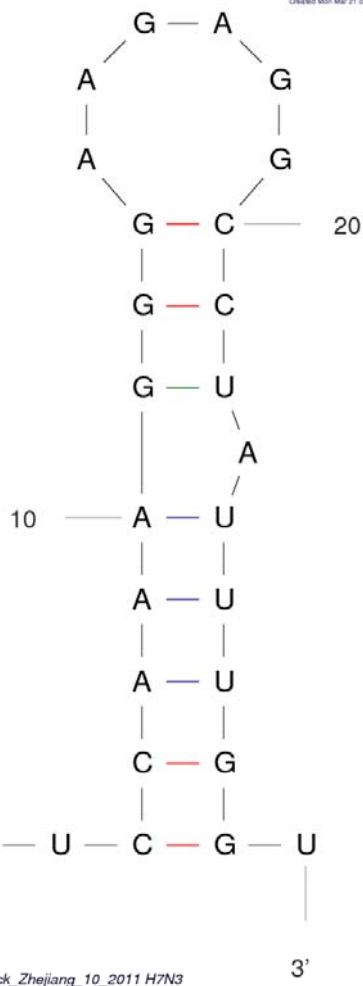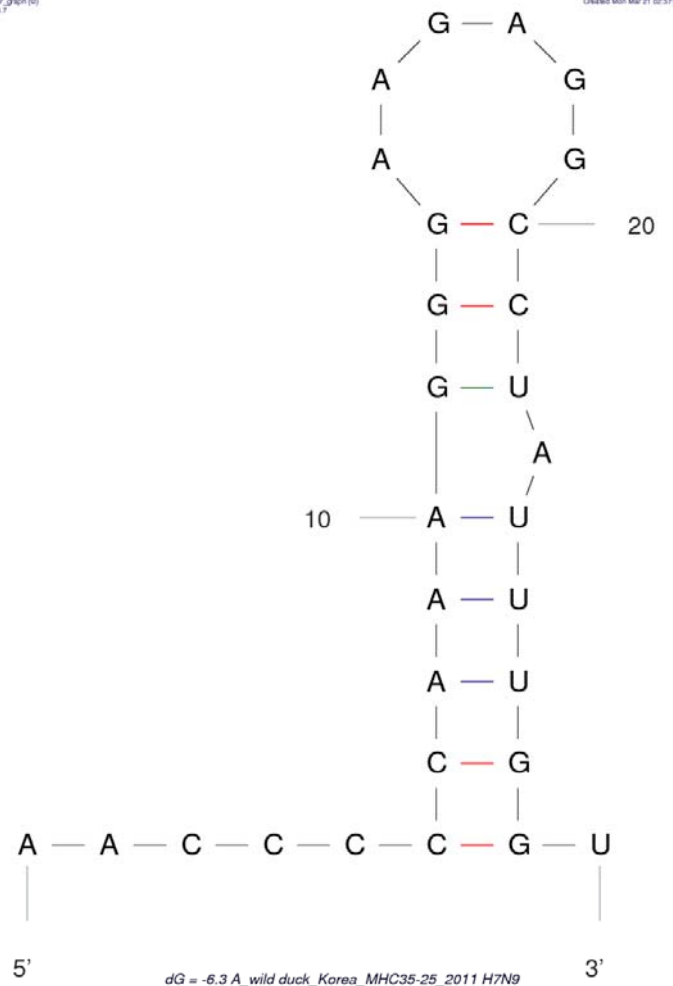

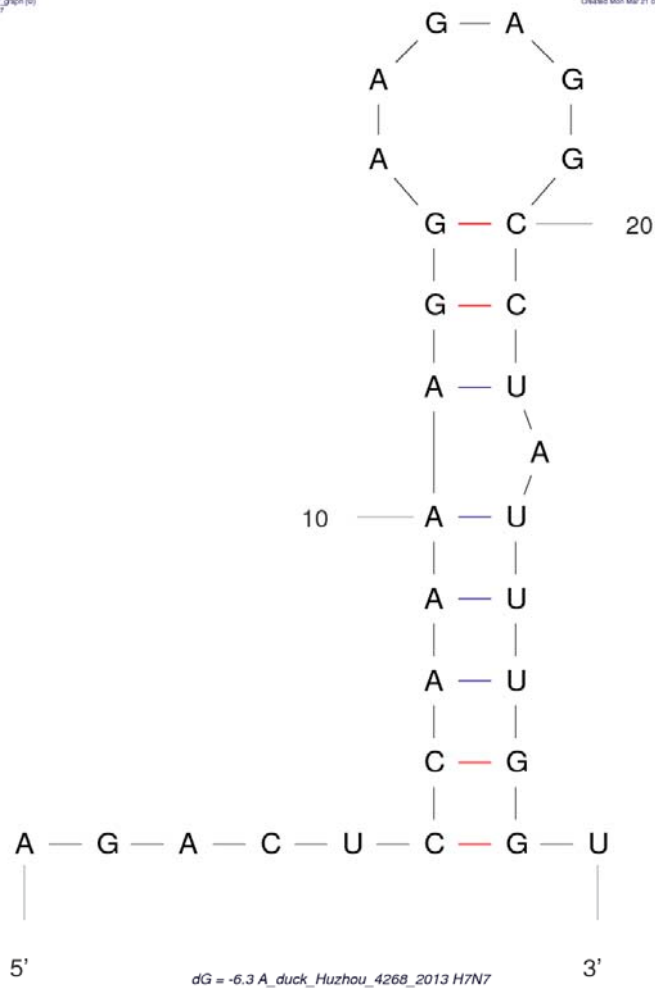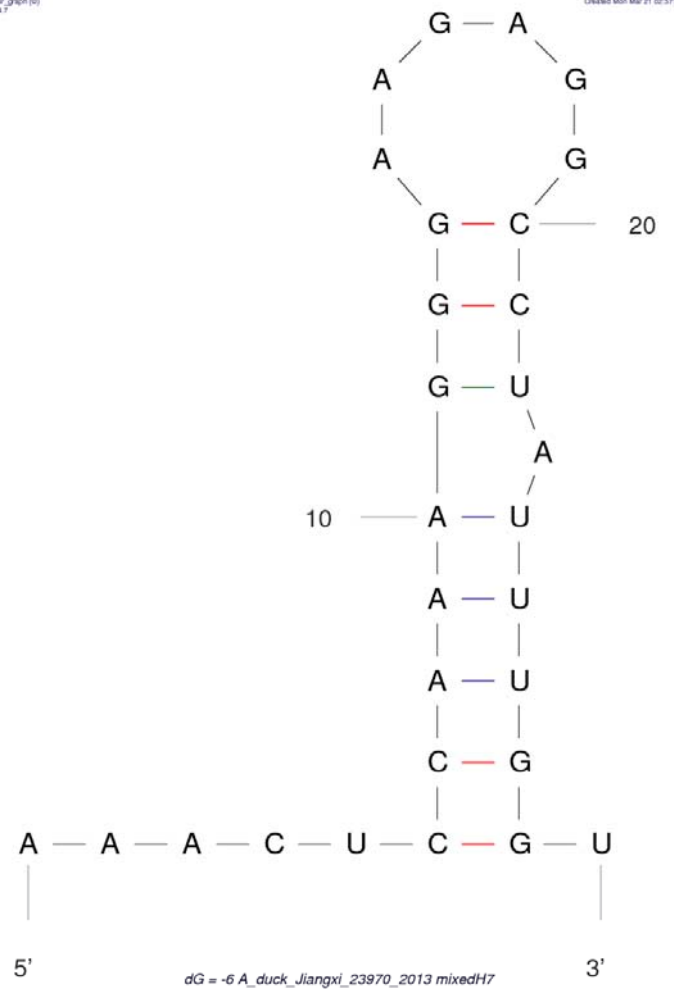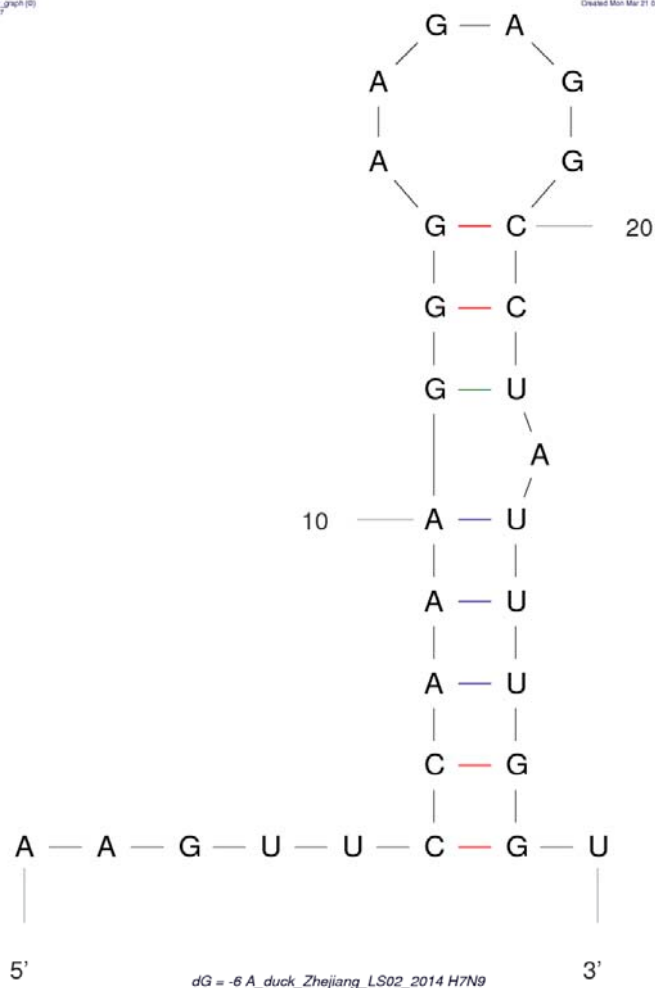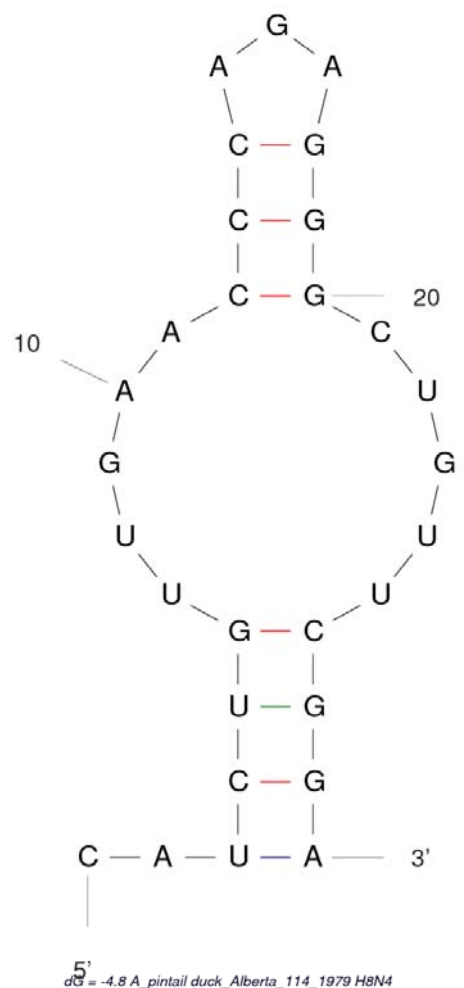

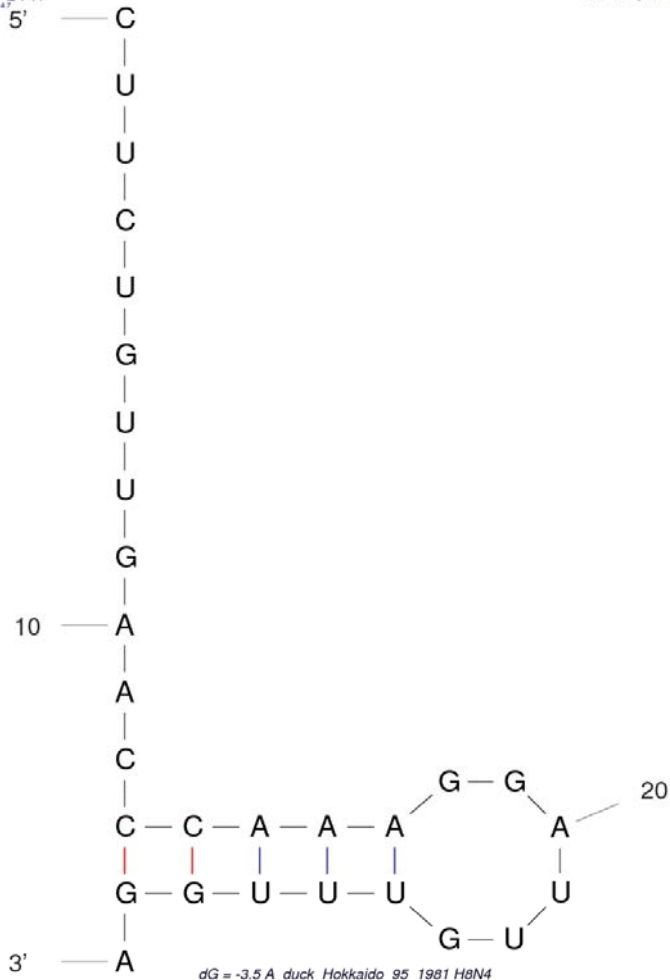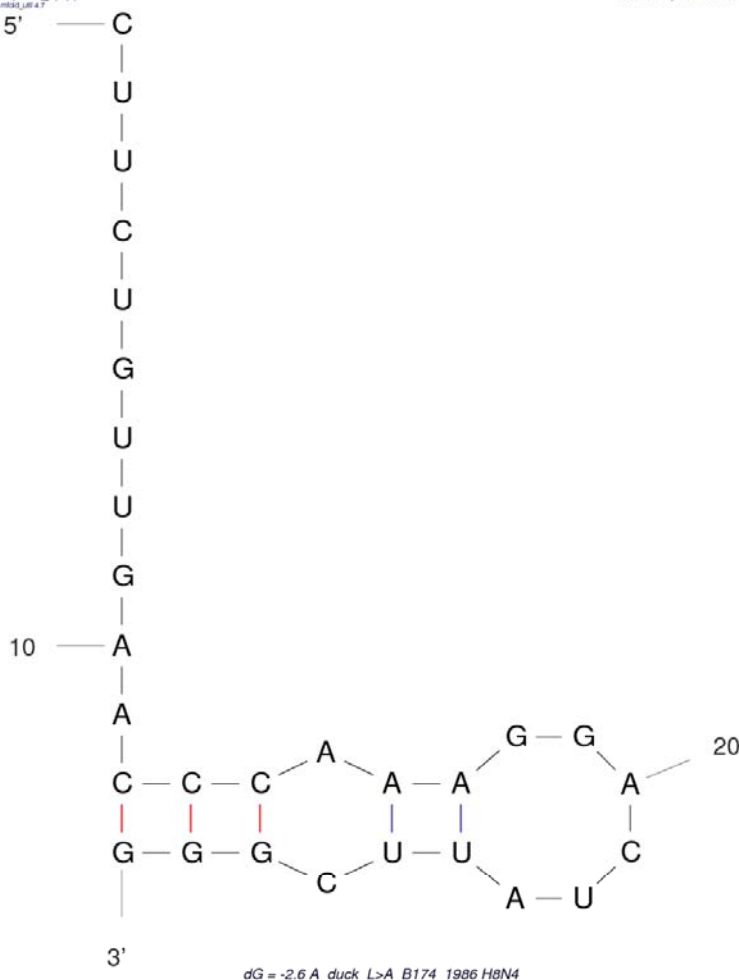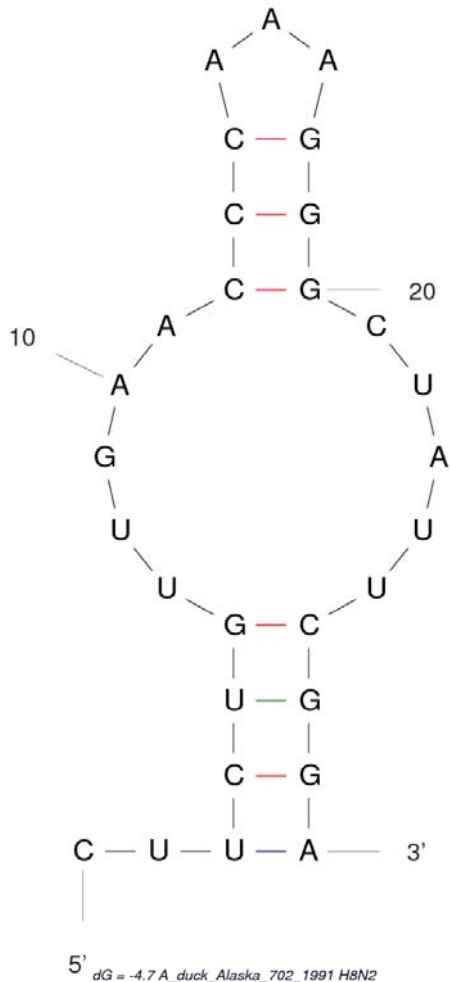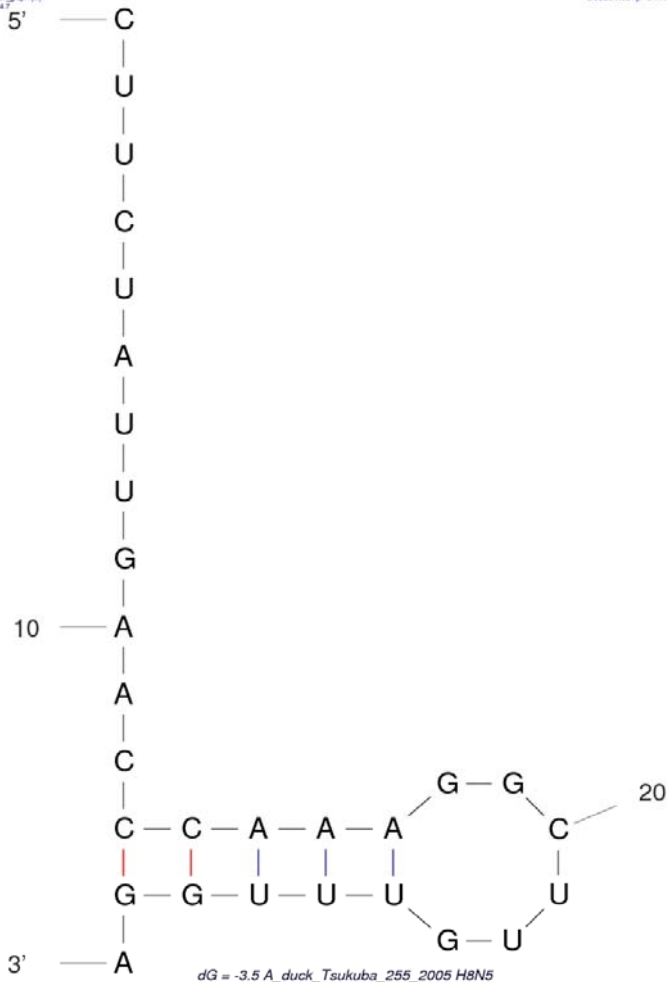

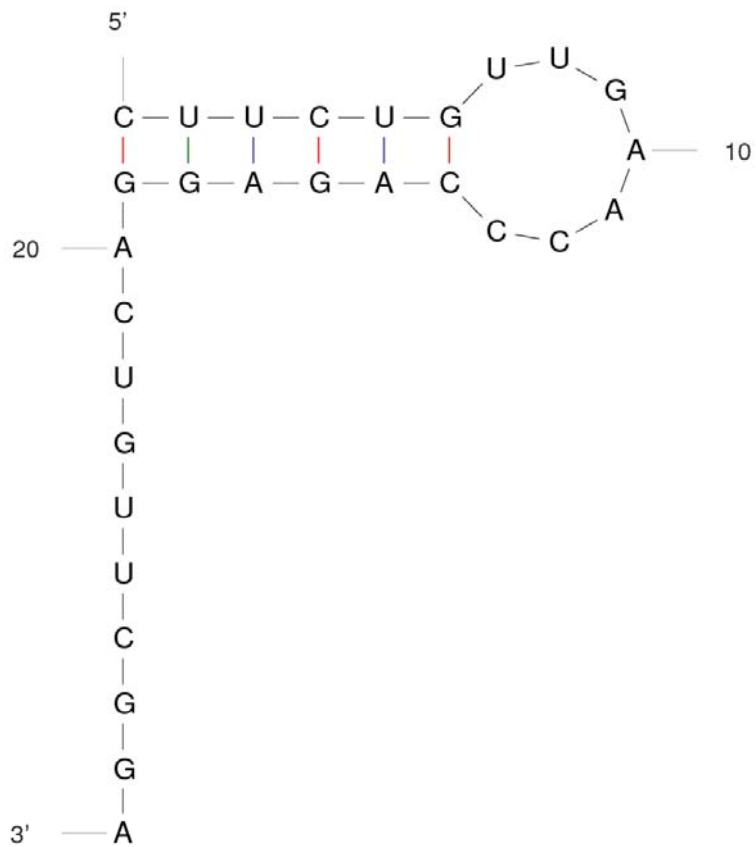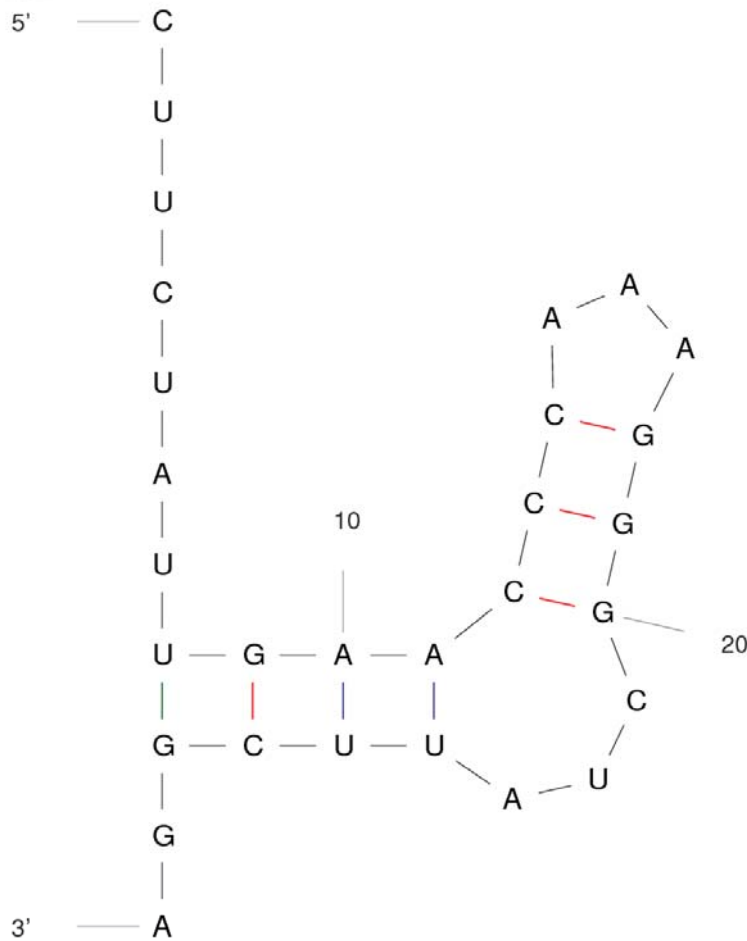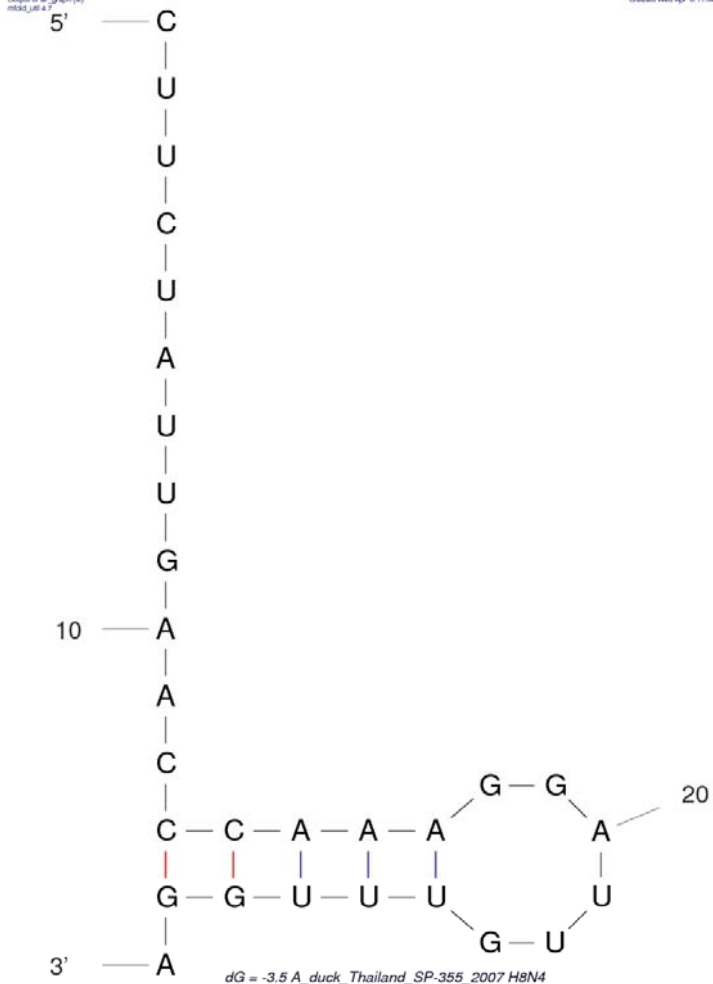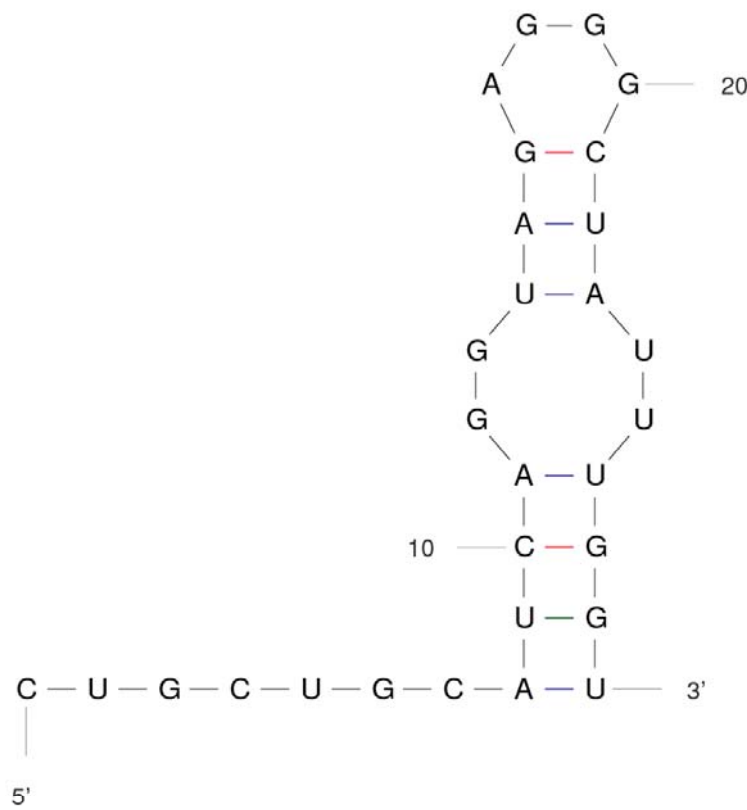

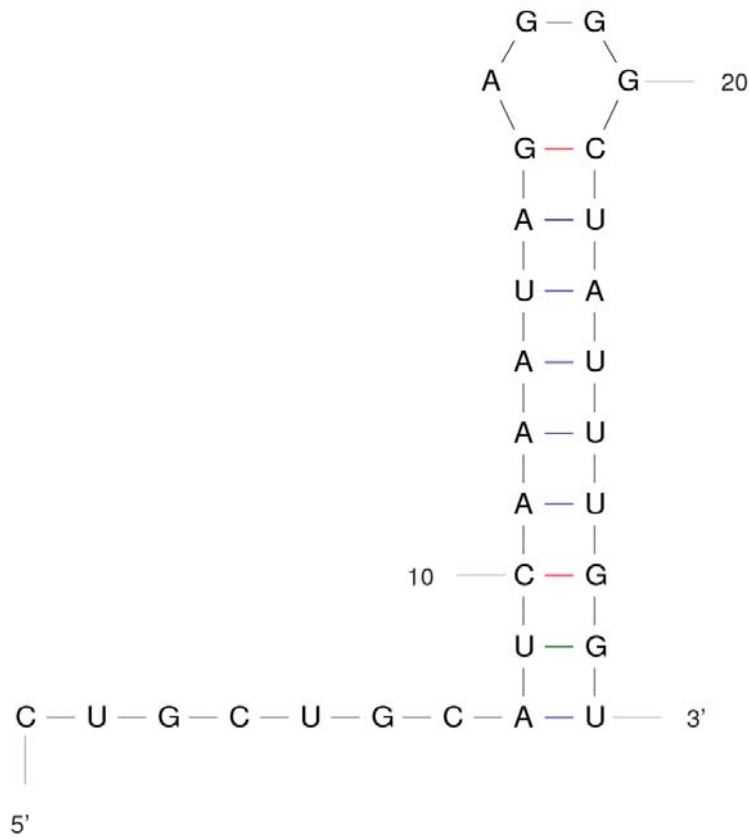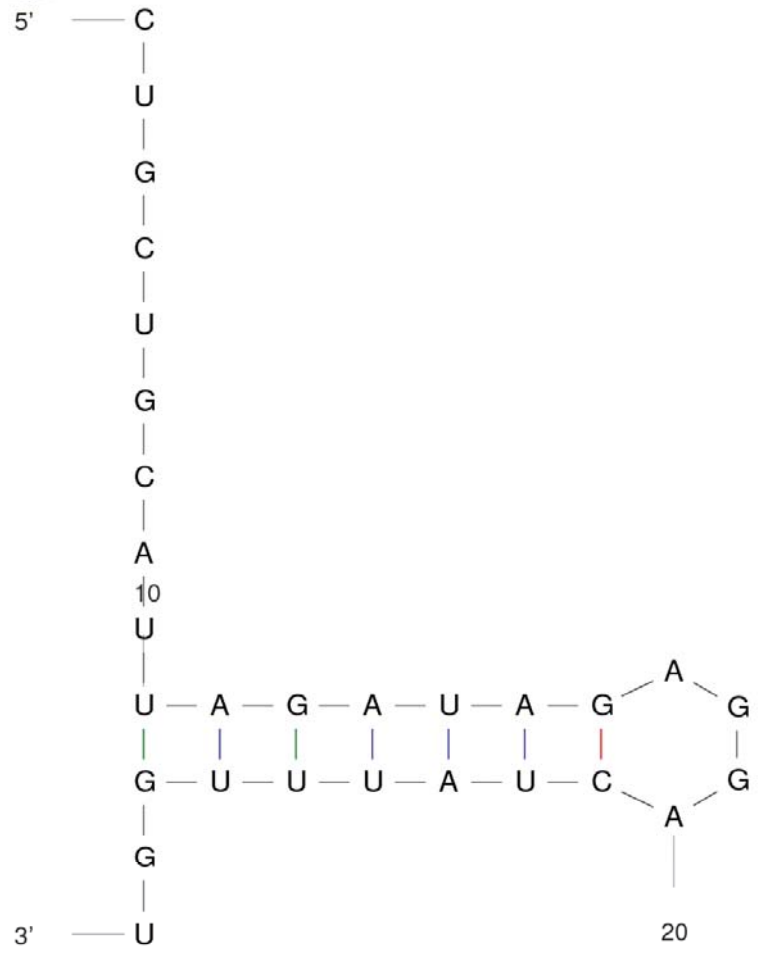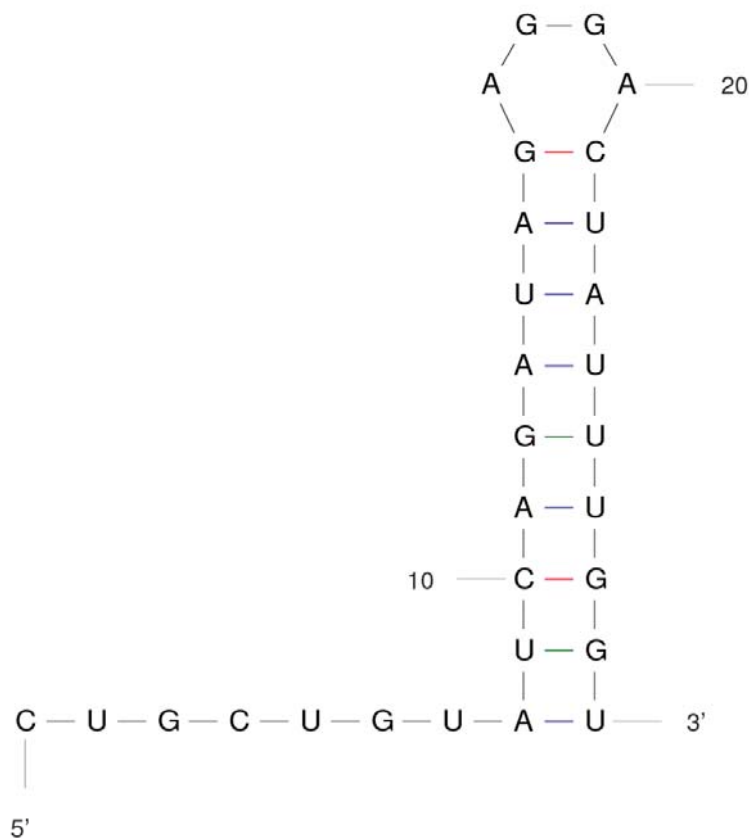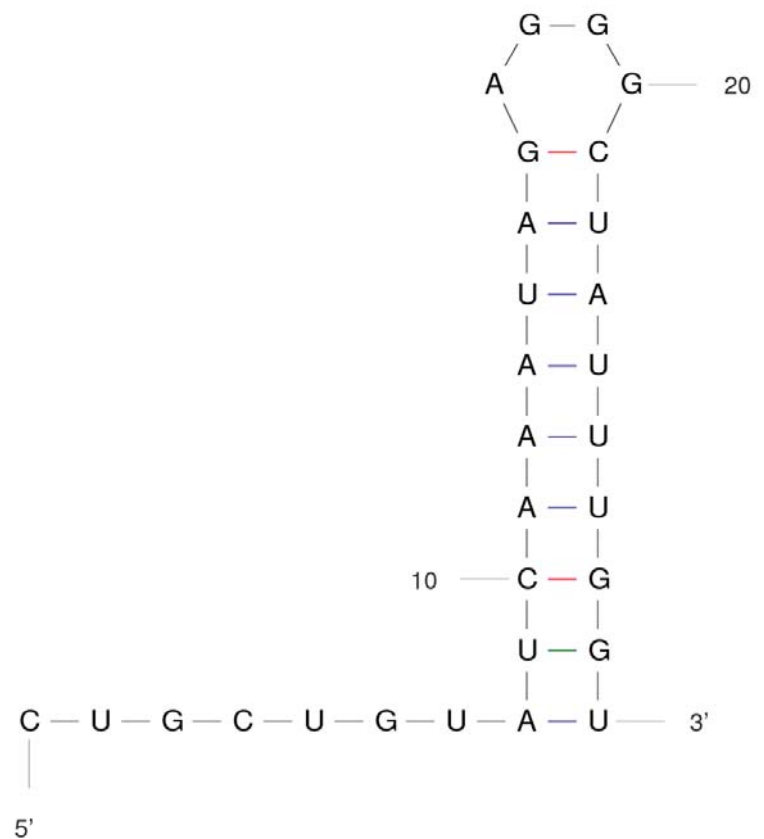

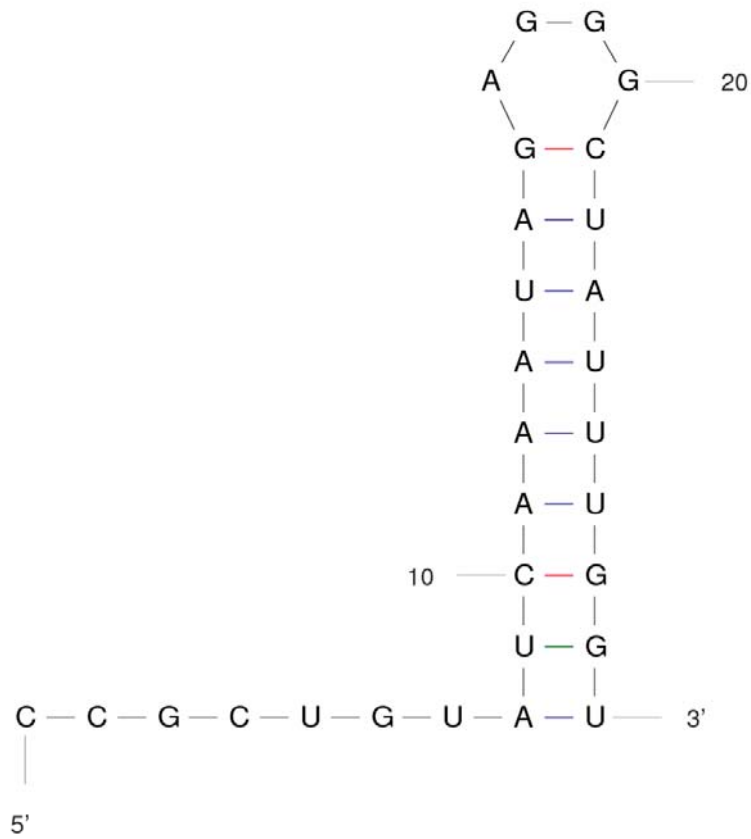

*dG = -6.7 A\_duck\_Hong Kong\_610\_79 H9N2*

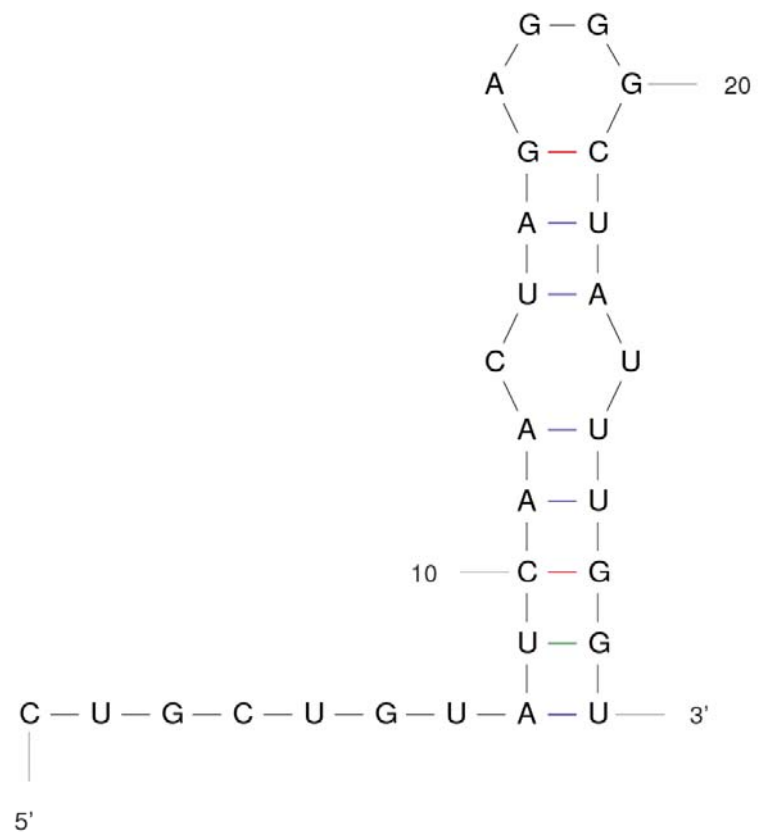

*dG = -3 A\_duck\_Hong Kong\_702\_1979-chicken adapted H9N2*

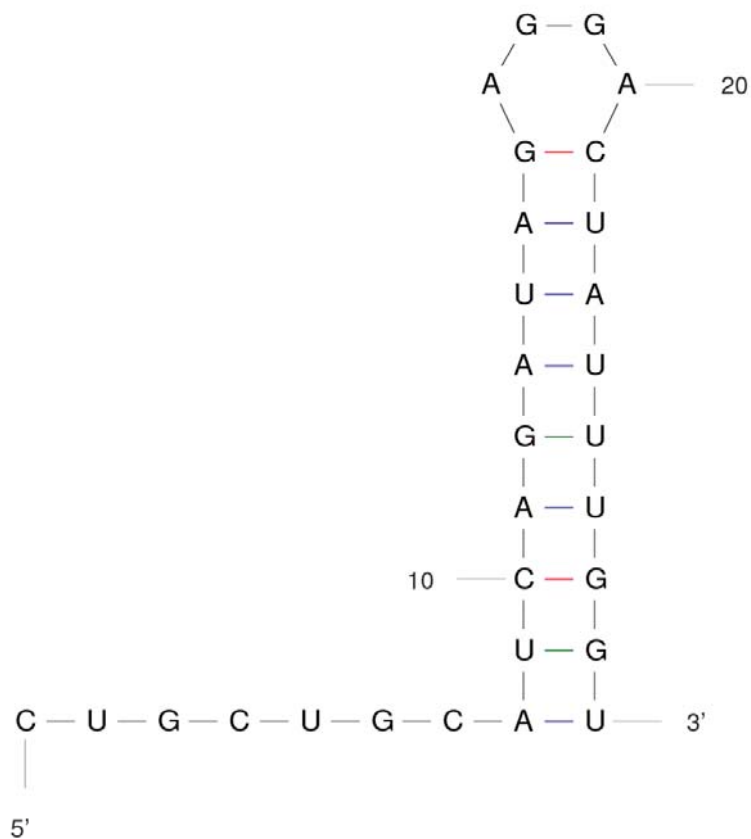

*dG = -6.7 A\_duck\_Hong Kong\_784\_1979 H9N2*

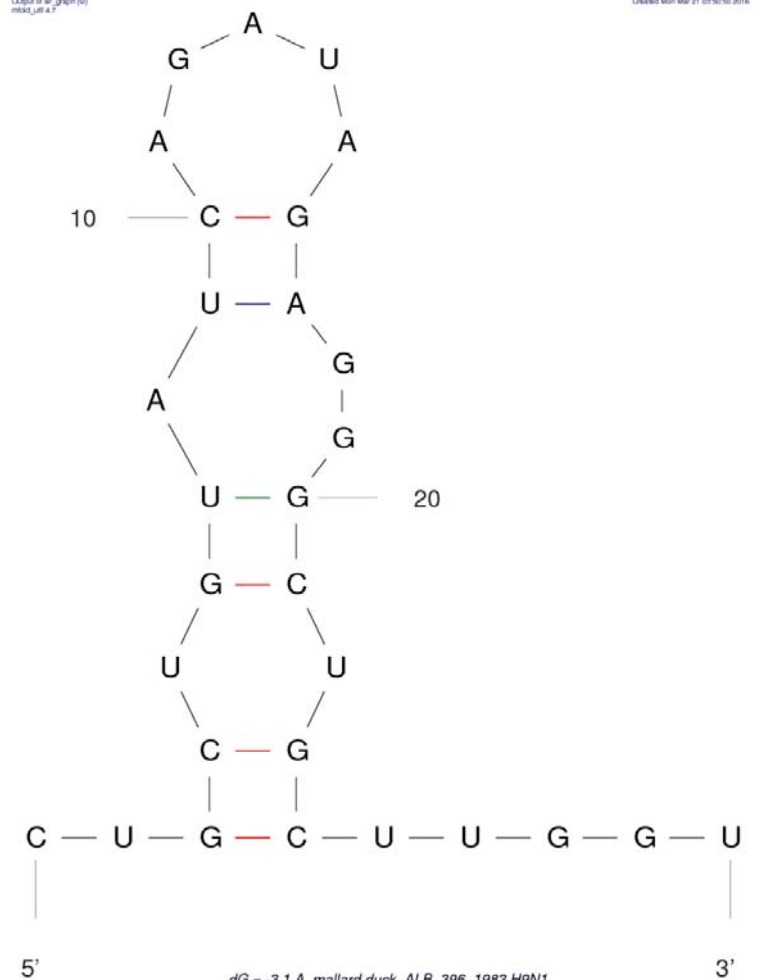

*dG = -3.1 A\_mallard duck\_ALB\_396\_1983 H9N1*

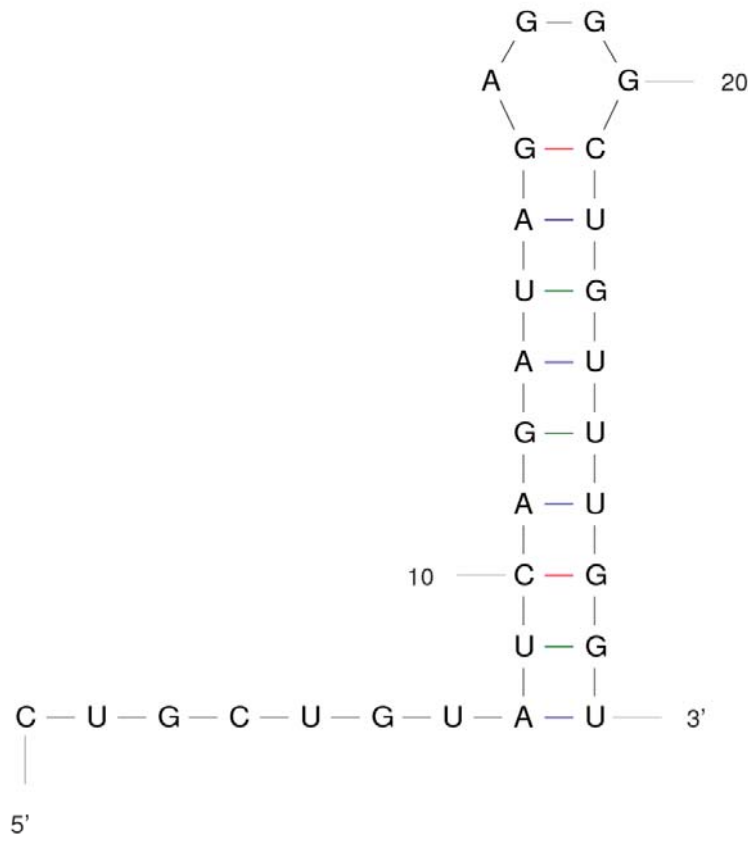

*dG = -6.8 A\_mallard duck\_ALB\_506\_1983 H9N1*

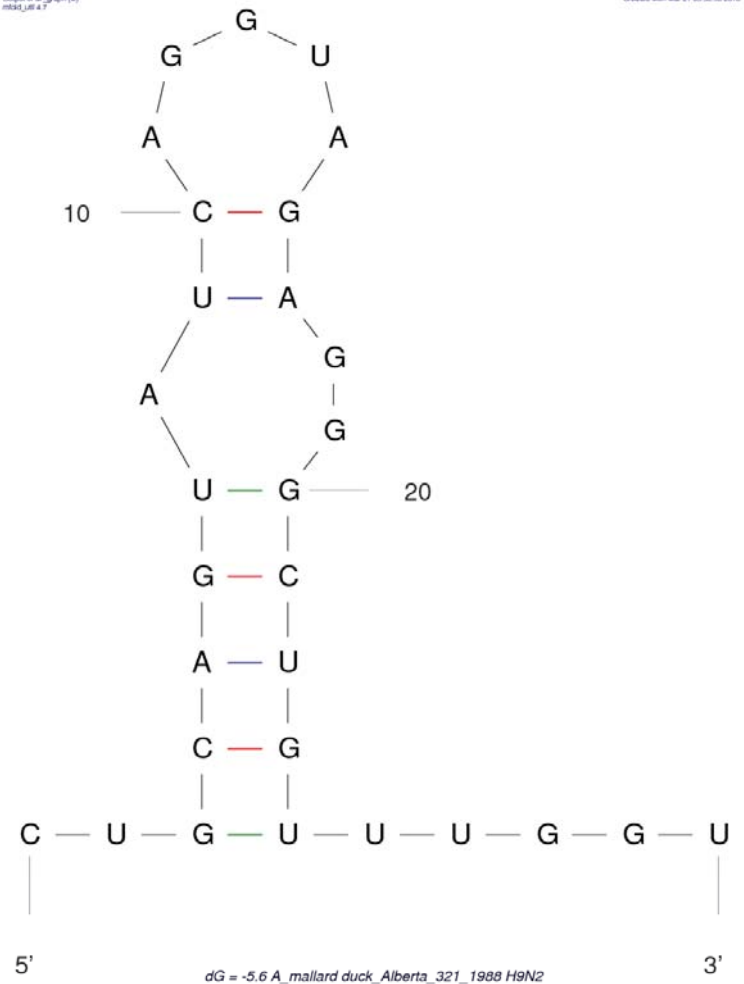

*dG = -5.6 A\_mallard duck\_Alberta\_321\_1988 H9N2*

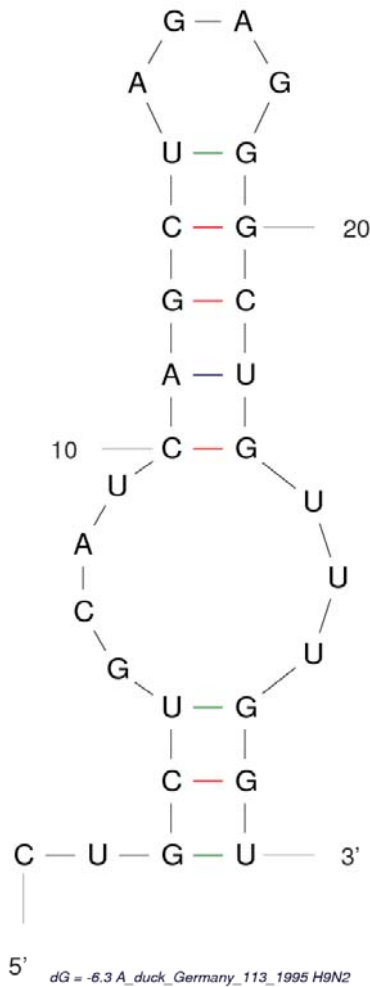

*dG = -6.3 A\_duck\_Germany\_113\_1995 H9N2*

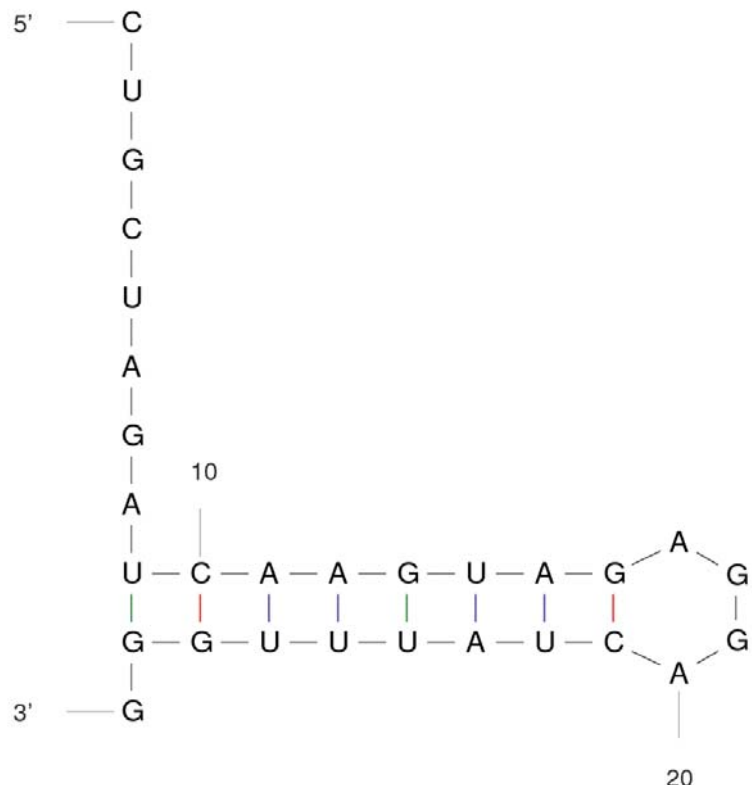

*dG = -5.7 A\_Muscovy duck\_Fujian\_CL\_1997 H9N2*



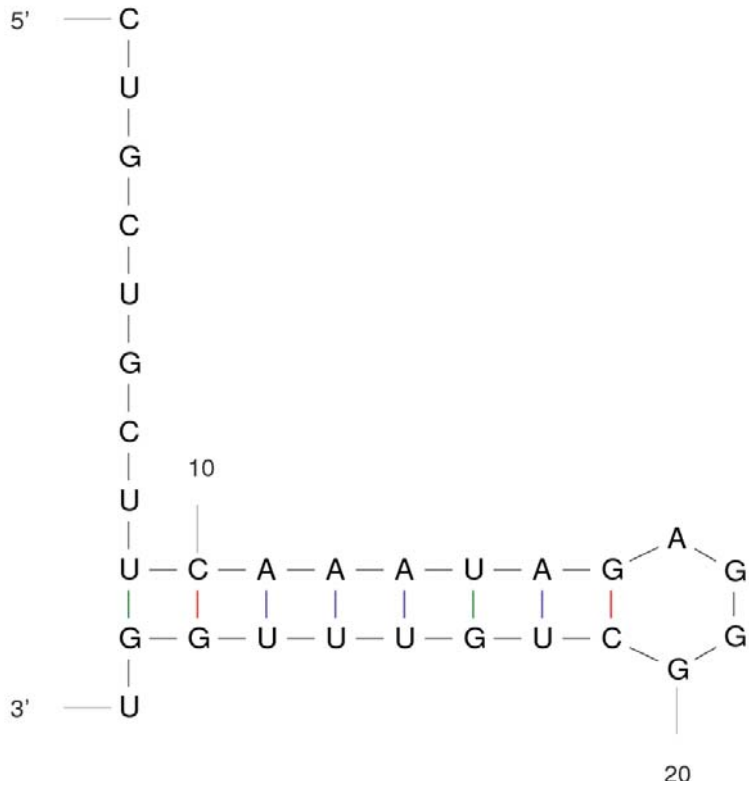

dG = -5.9 A\_duck\_Hong Kong\_Y439\_1997 H9N2

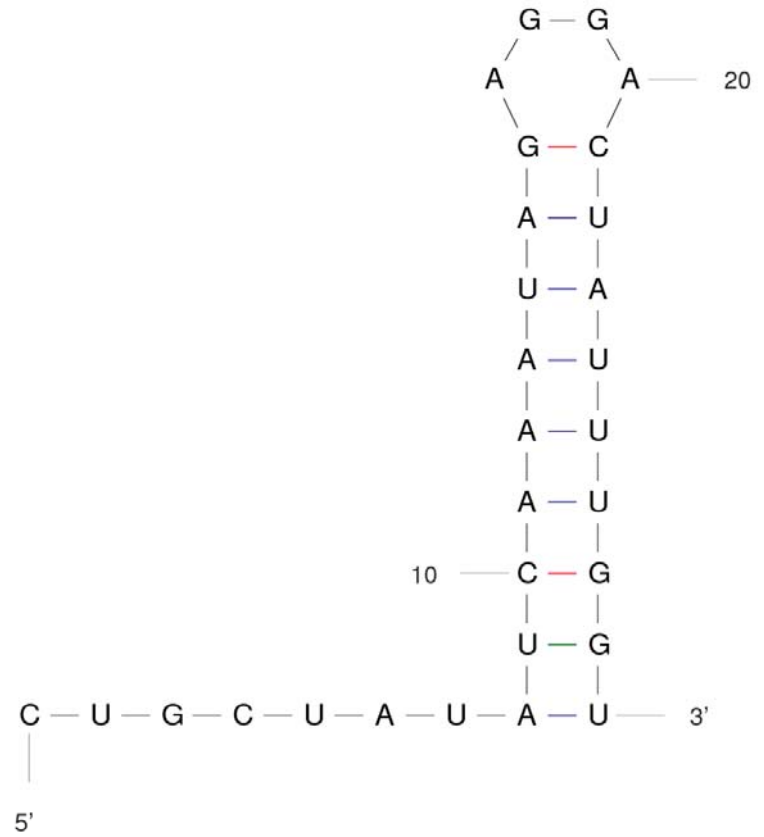

dG = -6.5 A\_duck\_Malaysia\_91\_1997 H9N2

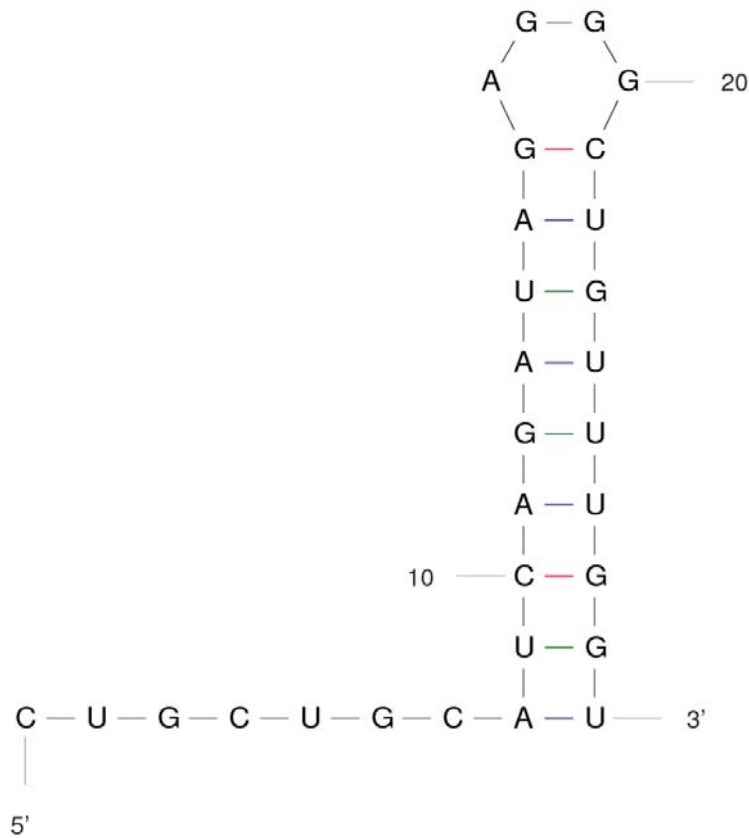

dG = -6.9 A\_duck\_Hokkaido\_49\_98 H9N2

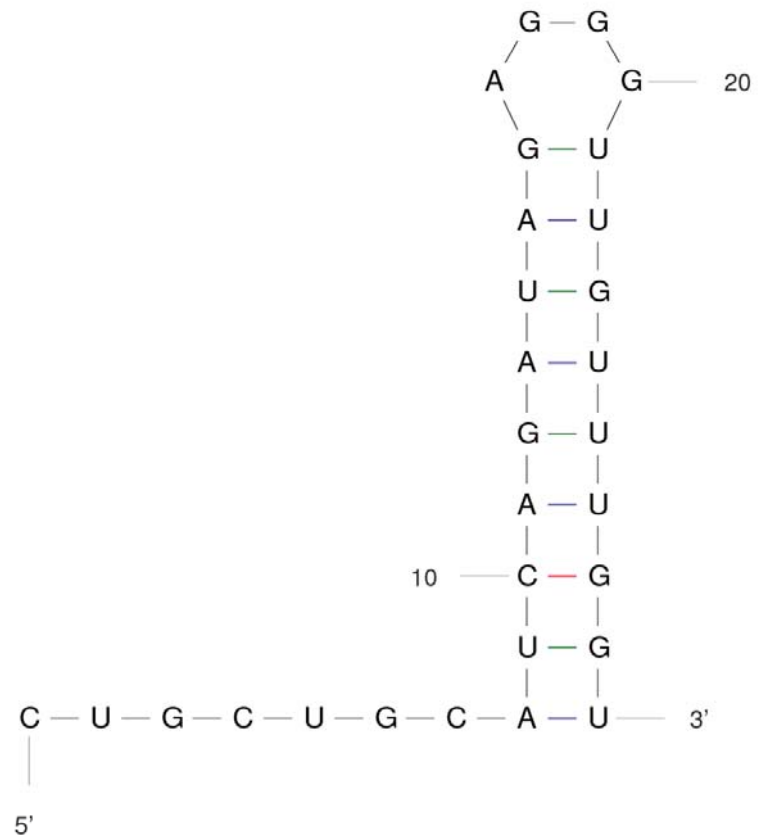

dG = -4.4 A\_duck\_Hokkaido\_9\_99 H9N2

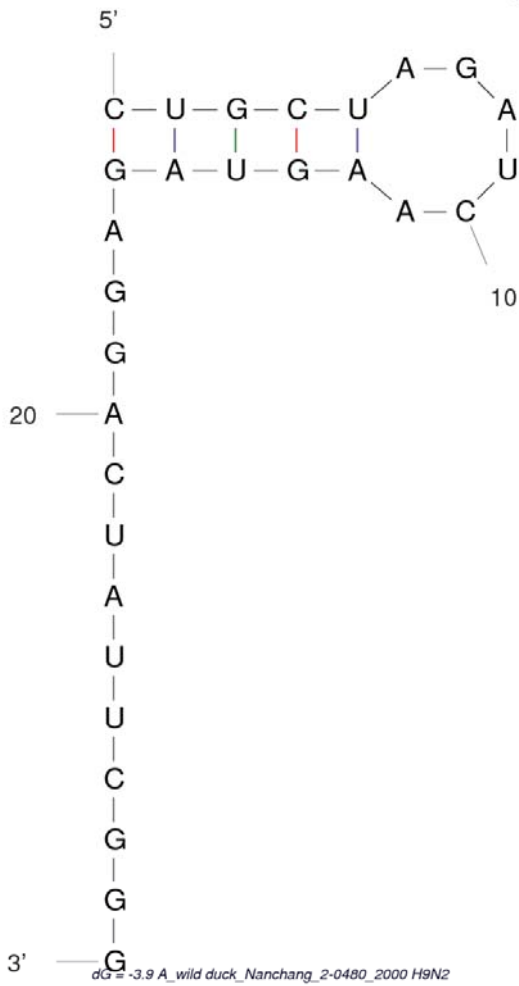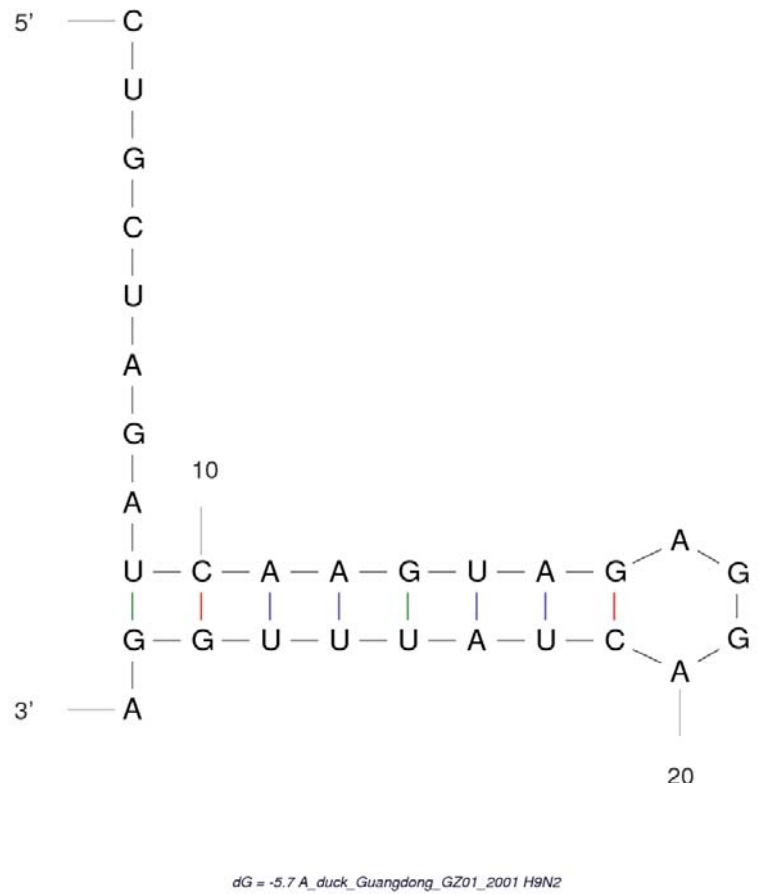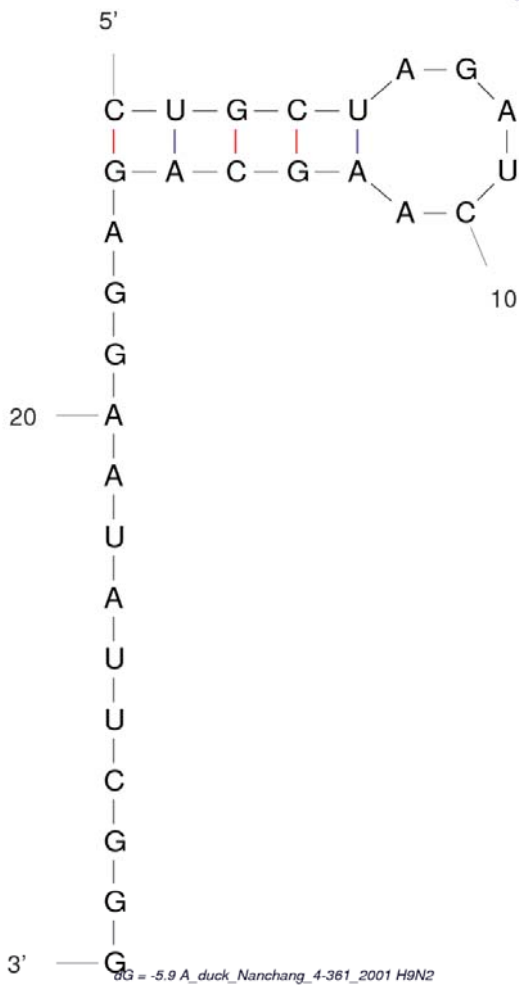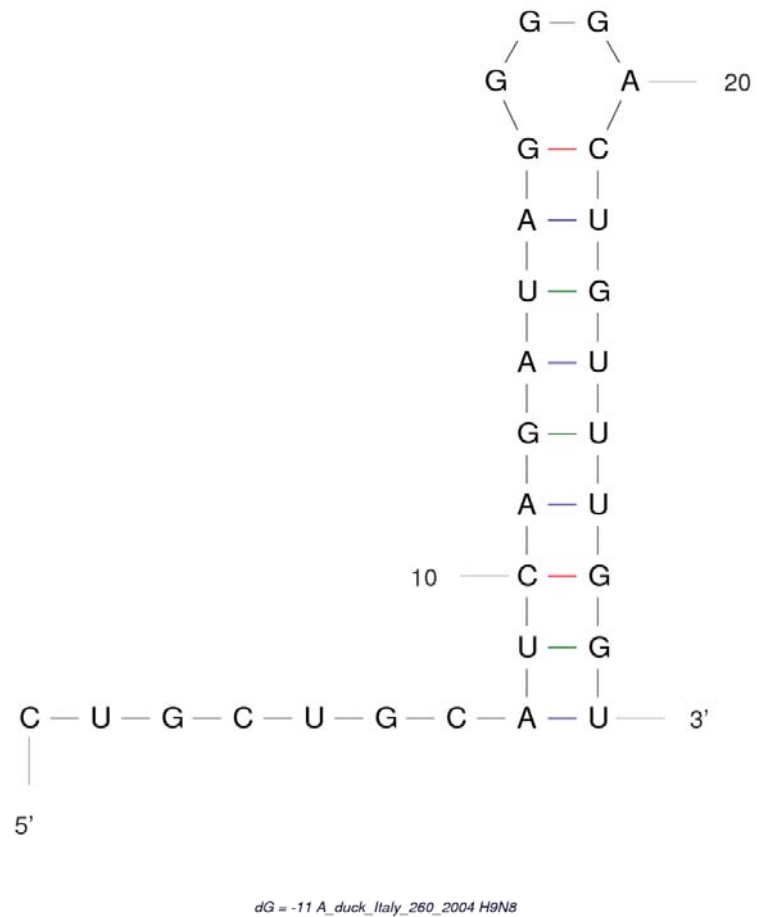

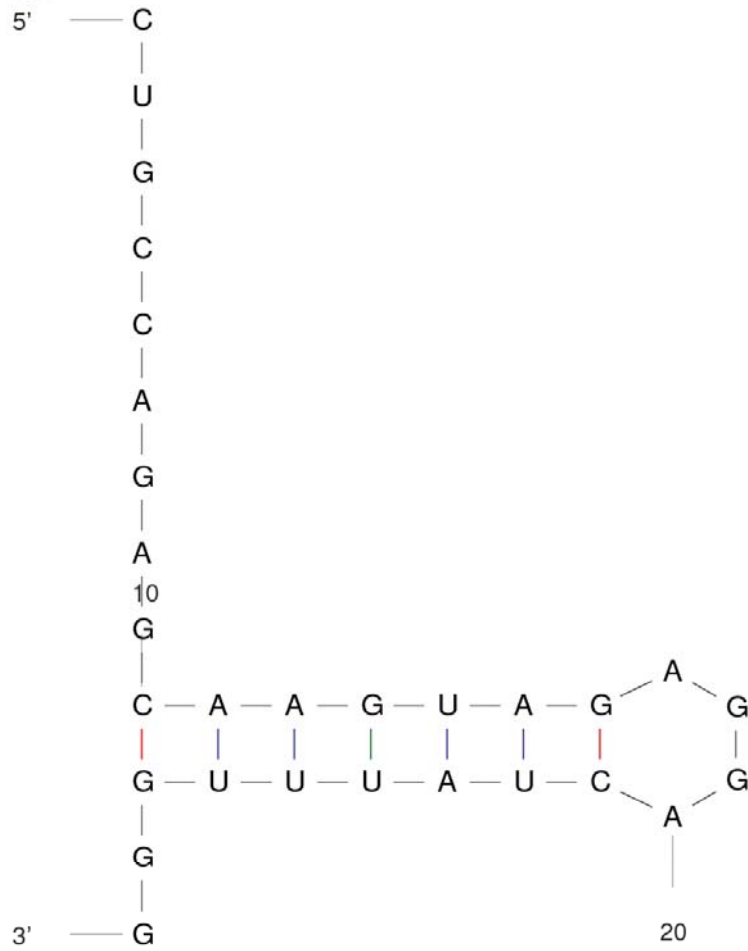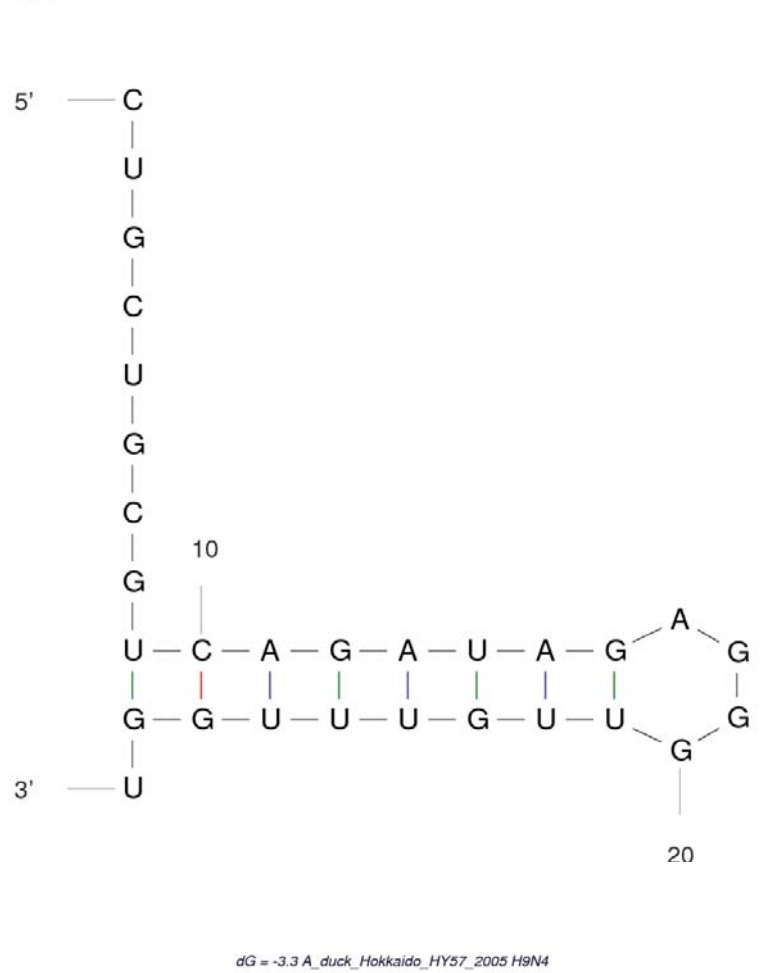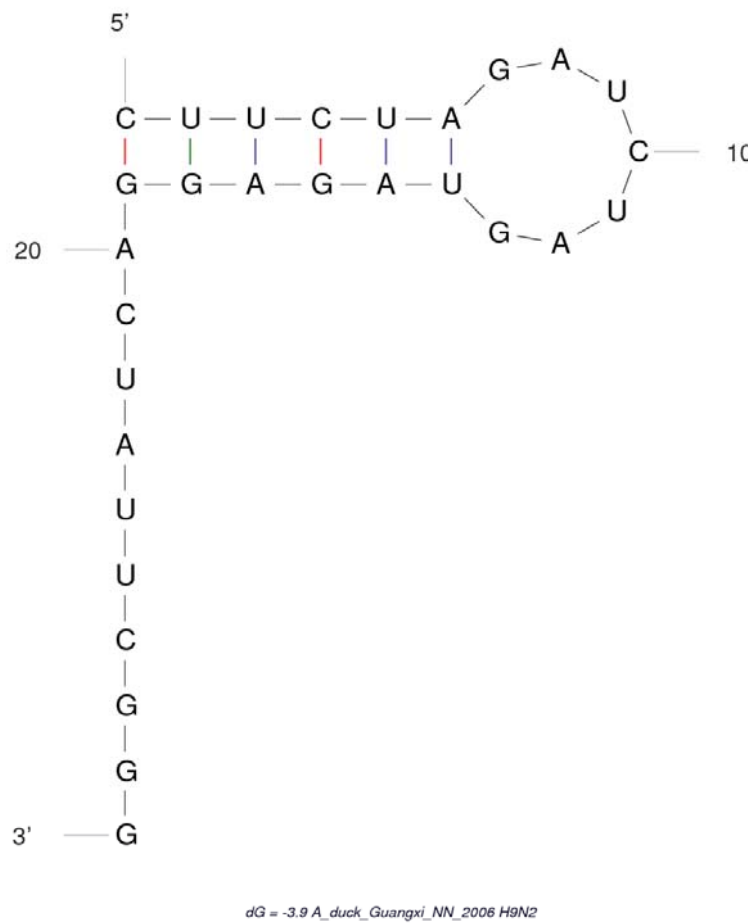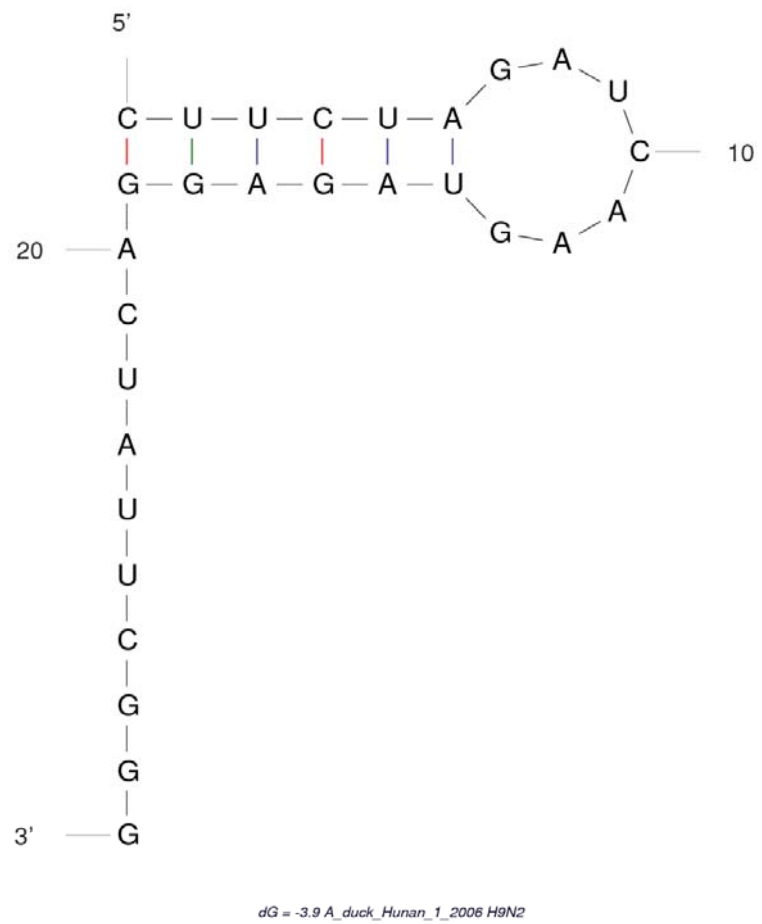



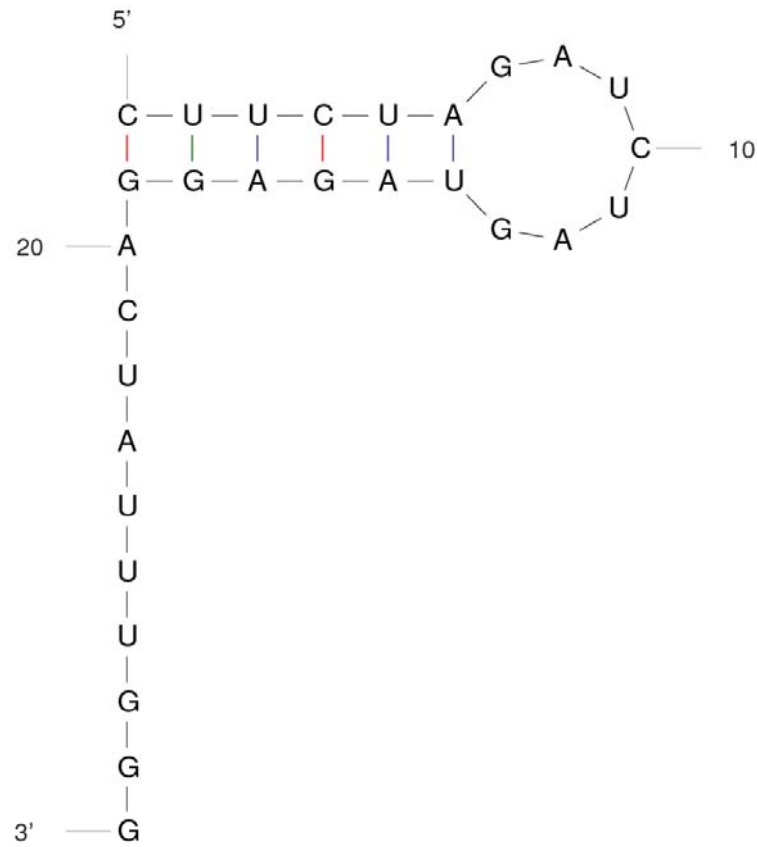

dG = -3.9 A\_duck\_Guangdong\_B10\_2009 H9N2

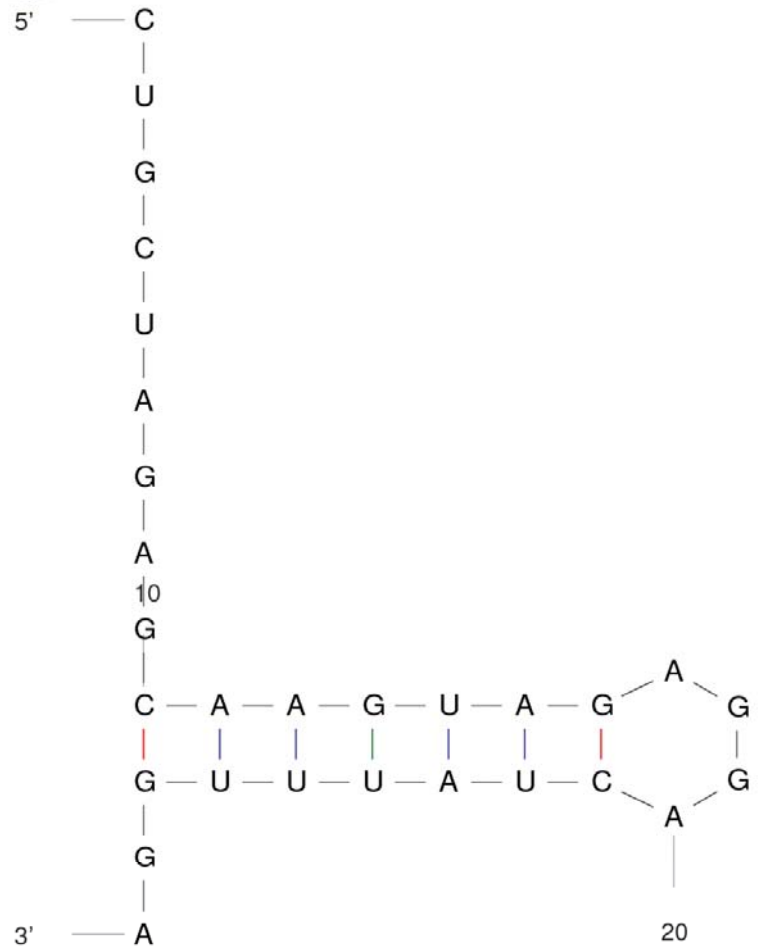

dG = -5.3 A\_duck\_Guangxi\_LAD9\_2009 H9N8

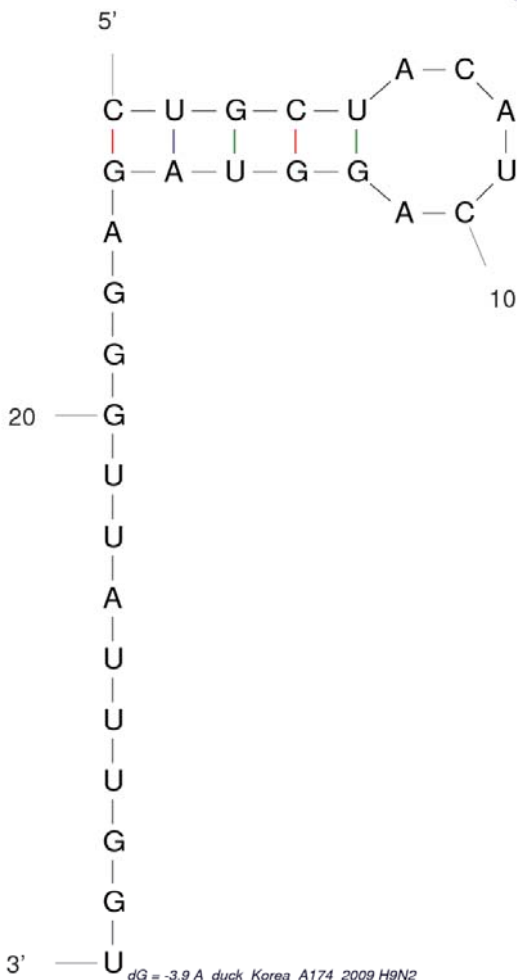

dG = -3.9 A\_duck\_Korea\_A174\_2009 H9N2

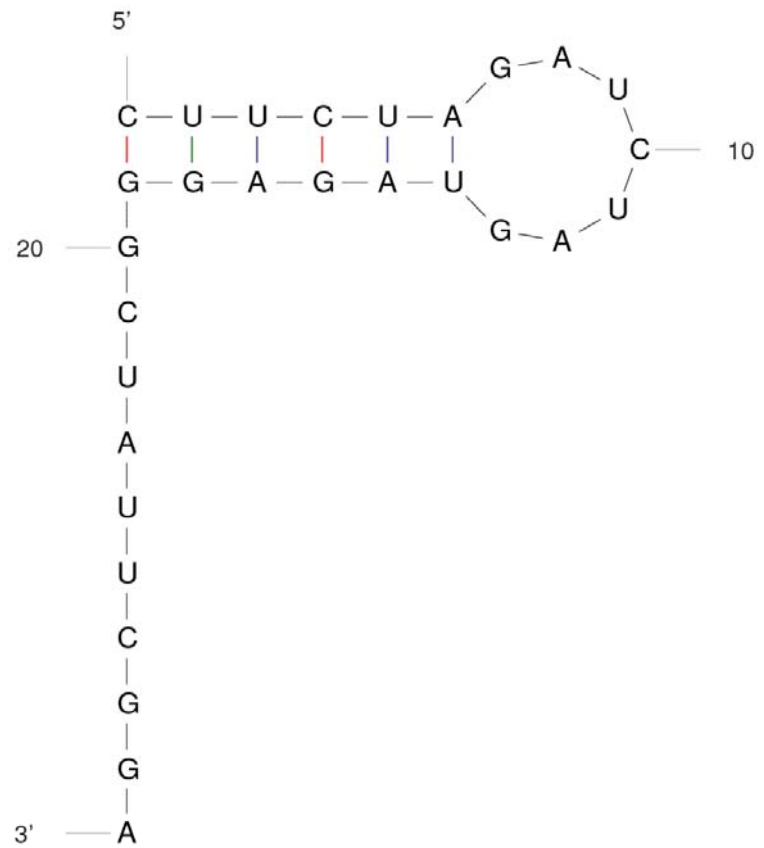

dG = -4.1 A\_duck\_Shanghai\_C163\_2009 H9N2

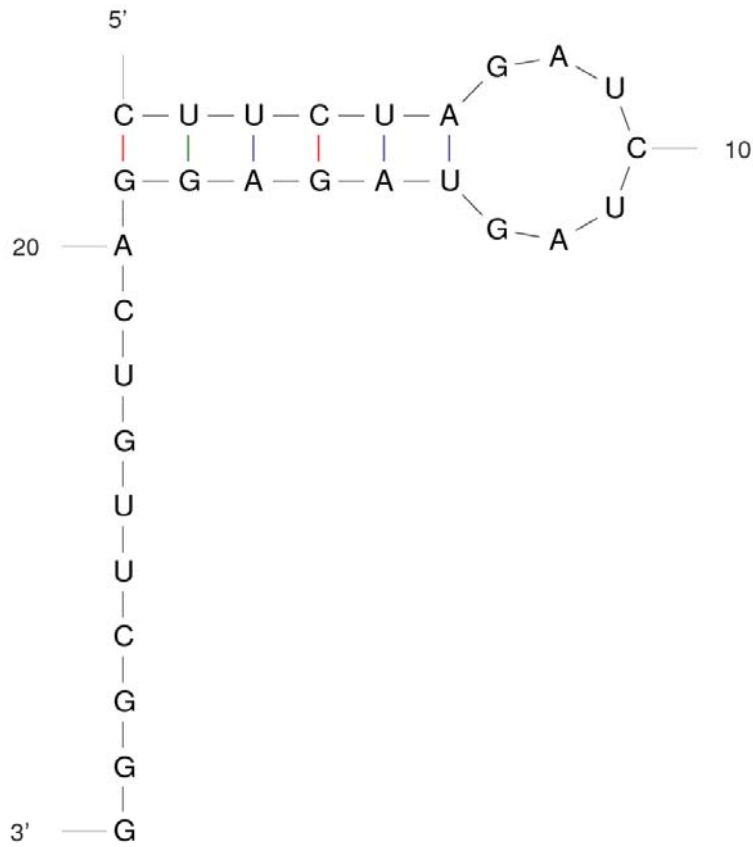

dG = -3.9 A\_duck\_Tibet\_S2\_2009 H9N2

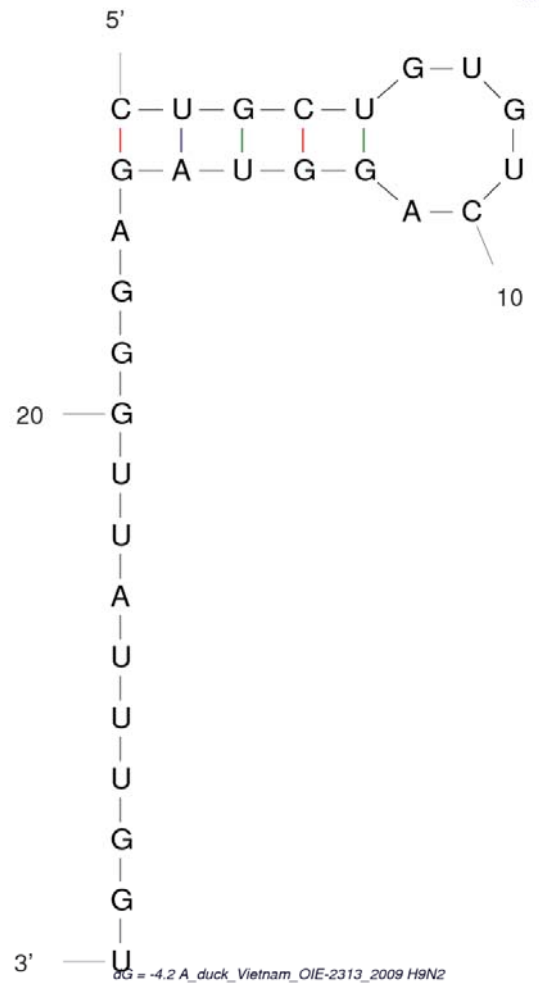

dG = -4.2 A\_duck\_Vietnam\_OIE-2313\_2009 H9N2

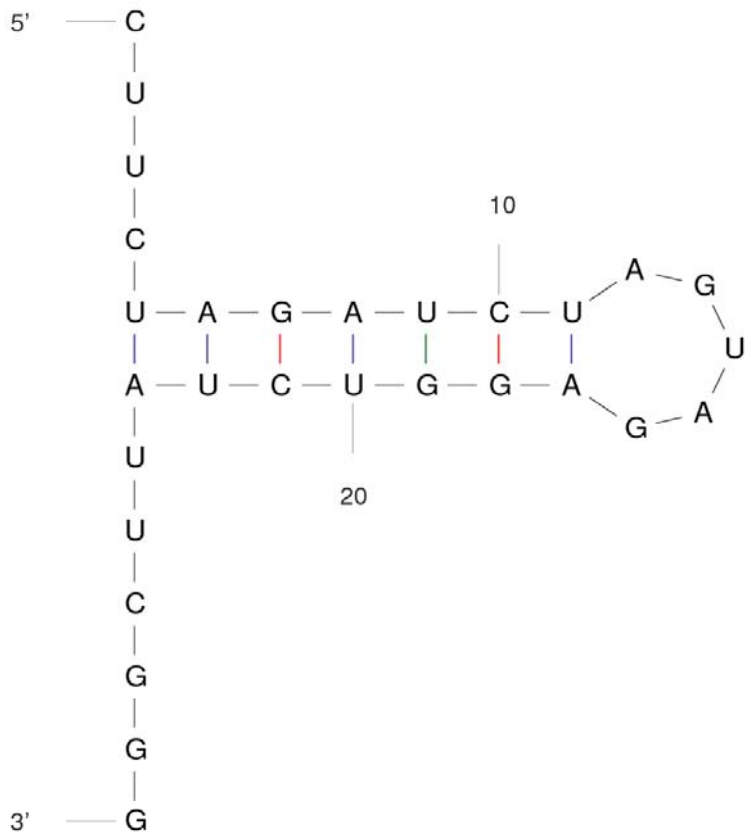

dG = -6.1 A\_duck\_Guangdong\_G17\_2010 H9N2

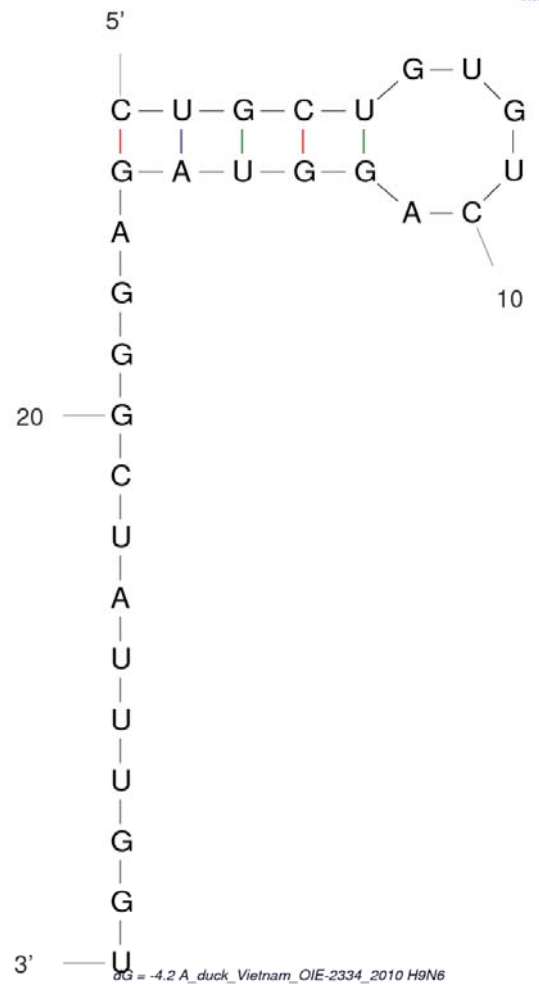

dG = -4.2 A\_duck\_Vietnam\_OIE-2334\_2010 H9N6

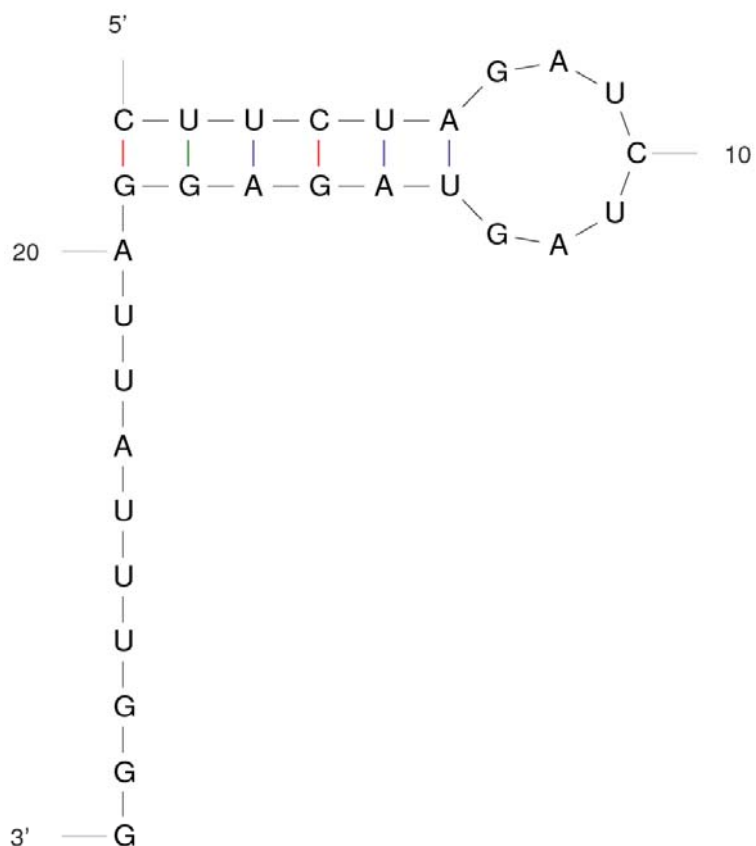

dG = -3.9 A\_duck\_Hubei\_C1146\_2011 H9N2

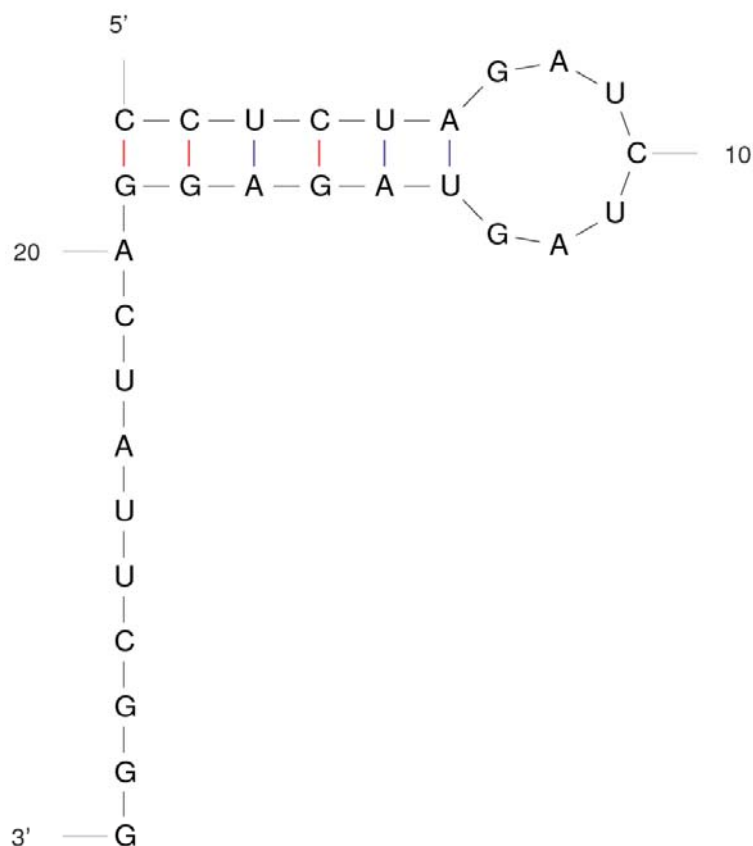

dG = -6.6 A\_duck\_Shandong\_TA01\_2012 H9N2

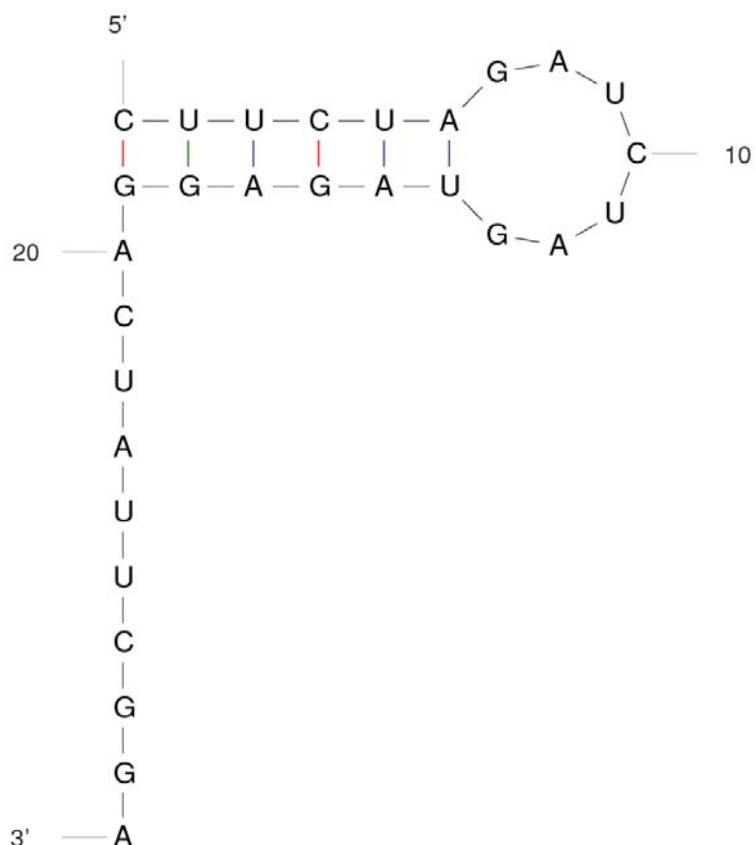

dG = -3.9 A\_duck\_Zhejiang\_Z42\_2012 H9

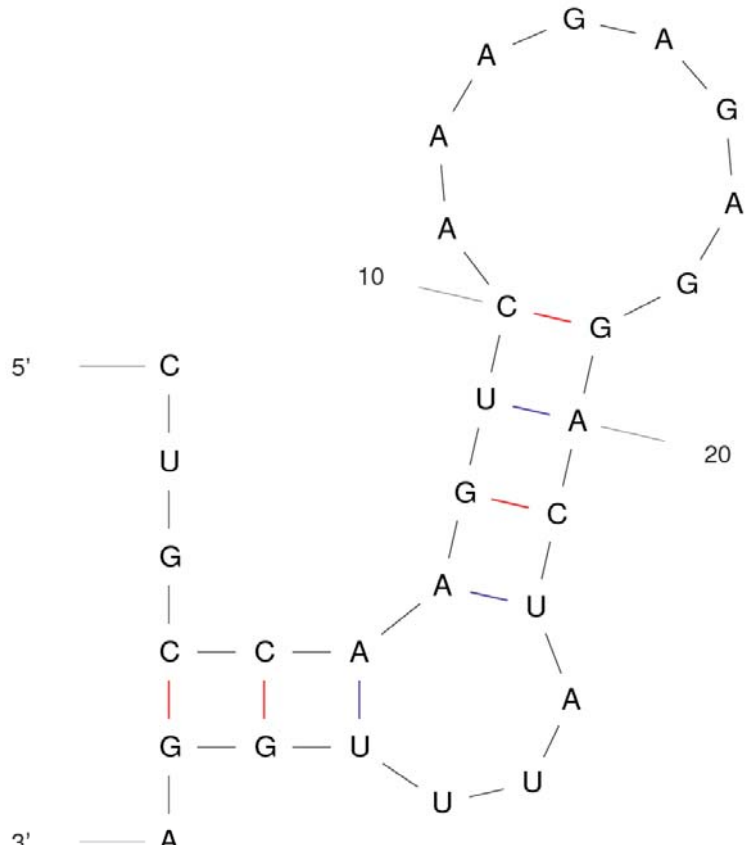

dG = -5 A\_duck\_Bangladesh\_21126\_2013 H9N2

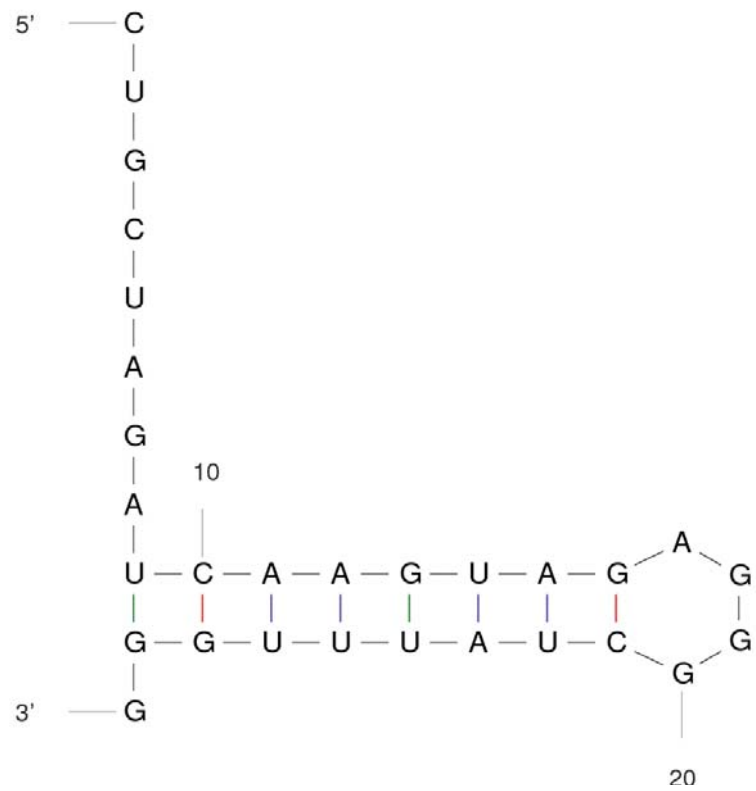

*dG = -5.9 A\_duck\_Jiangsu\_KS0802\_2013 H9N2*

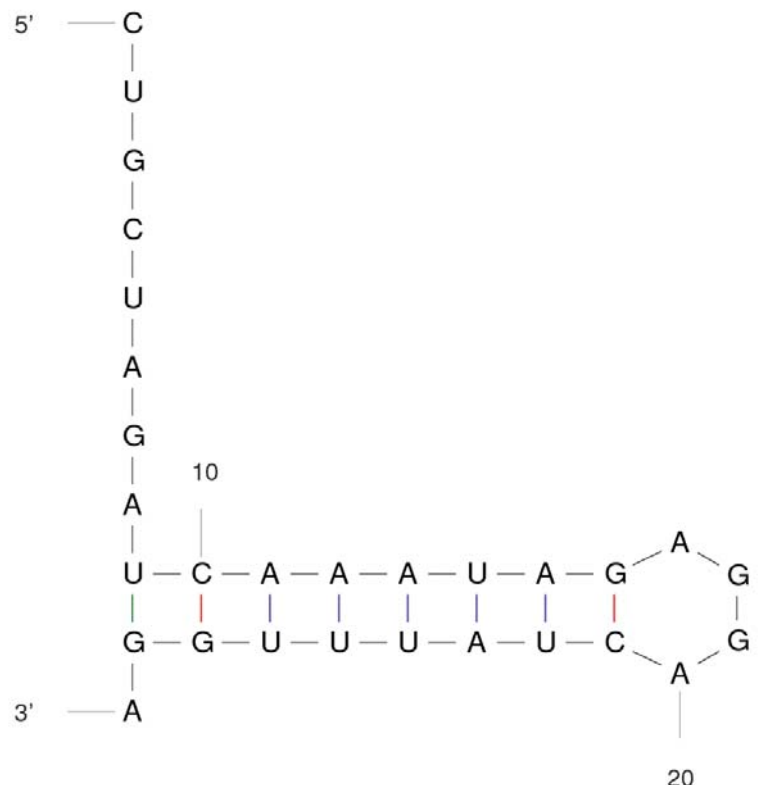

*dG = -5.7 A\_muscovy duck\_Vietnam\_LBM417\_2013 H9N2*

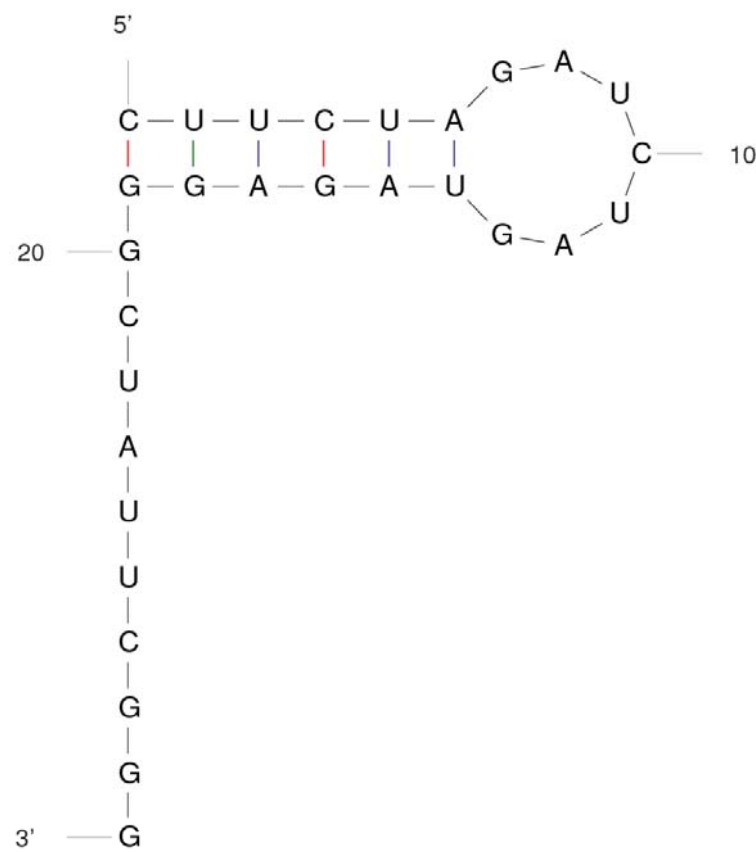

*dG = -4.1 A\_duck\_Guangdong\_G2259\_2014 H9*

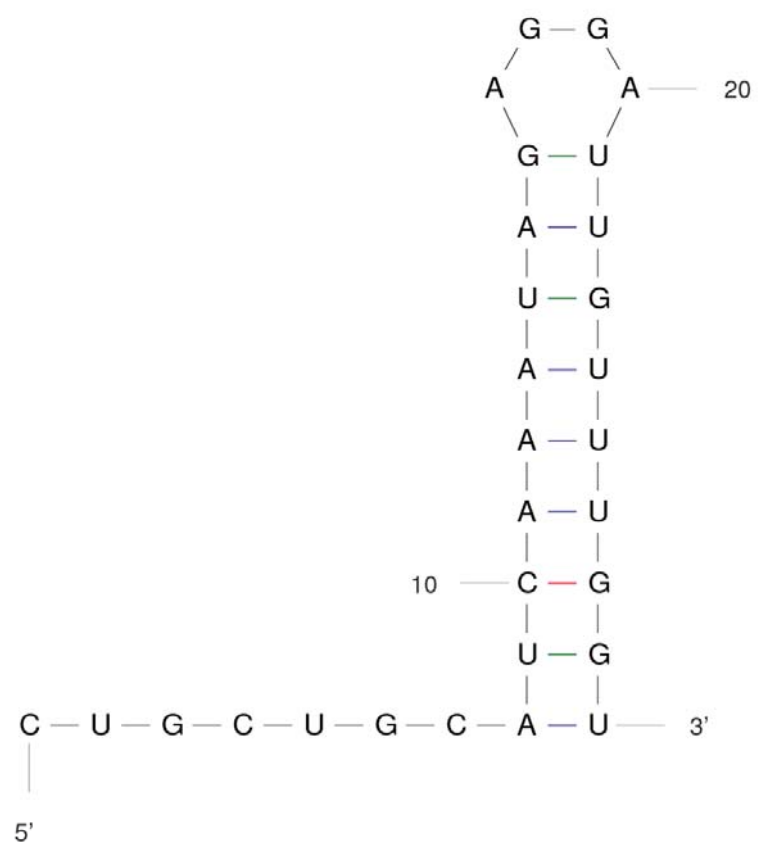

*dG = -3.8 A\_duck\_Wuhan\_WHYF05\_2014 H9N2*



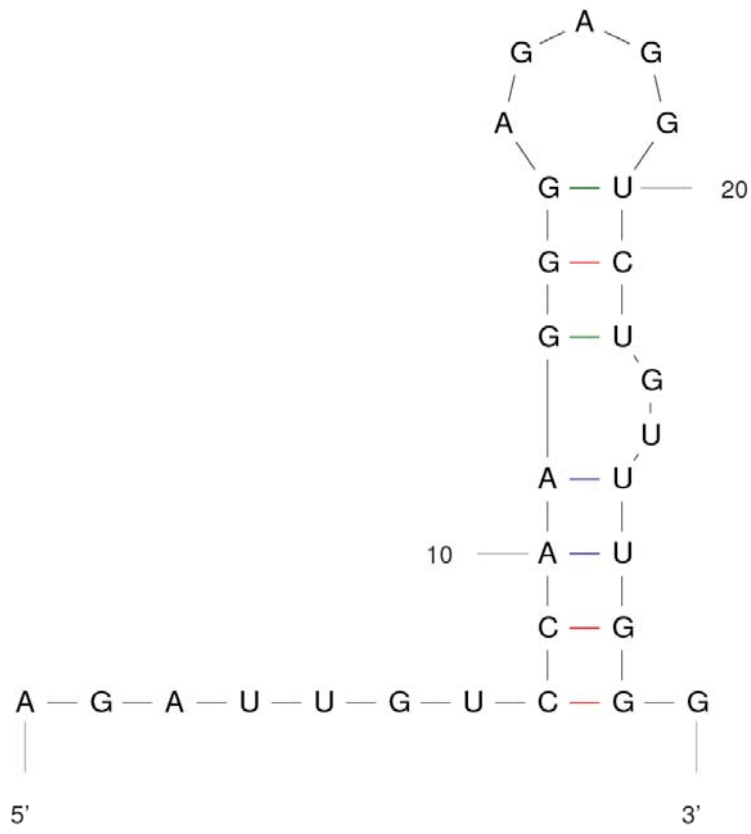

*dG = -4.3 A\_duck\_Manitoba\_1953 H10N7*

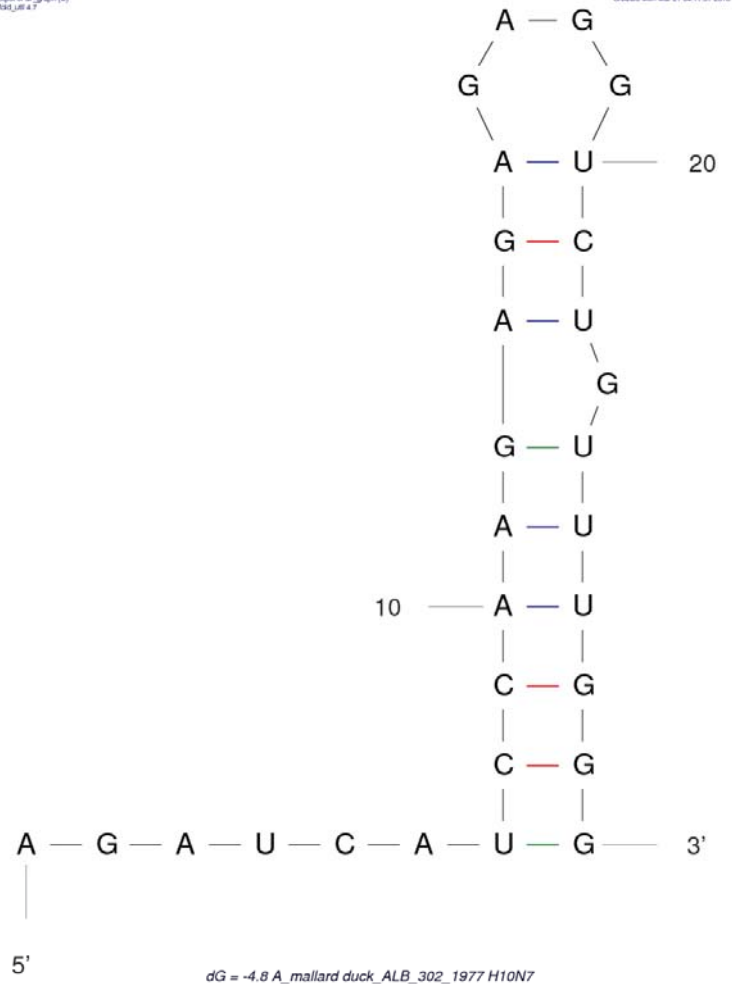

*dG = -4.8 A\_mallard duck\_ALB\_302\_1977 H10N7*

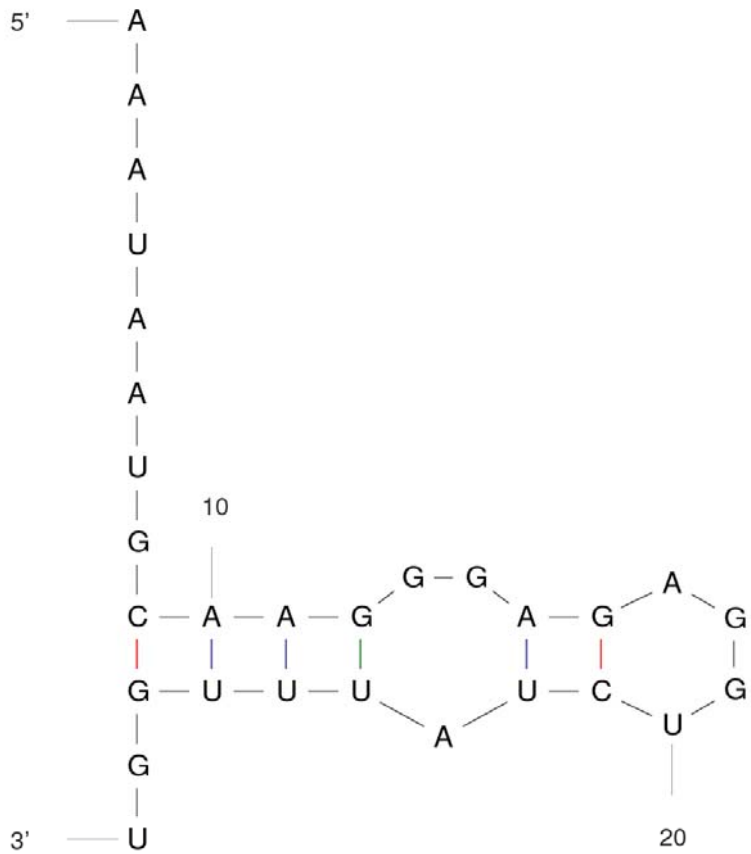

*dG = -1.7 A\_duck\_Hong Kong\_562\_1979 H10N9*

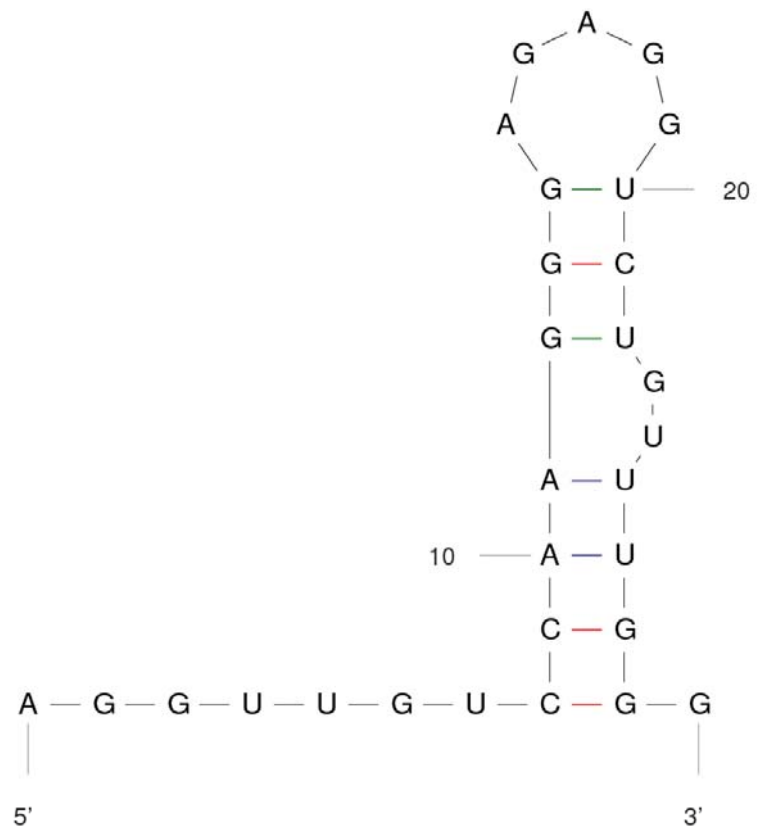

*dG = -4.3 A\_mallard duck\_Minnesota\_19\_1979 H10N7*

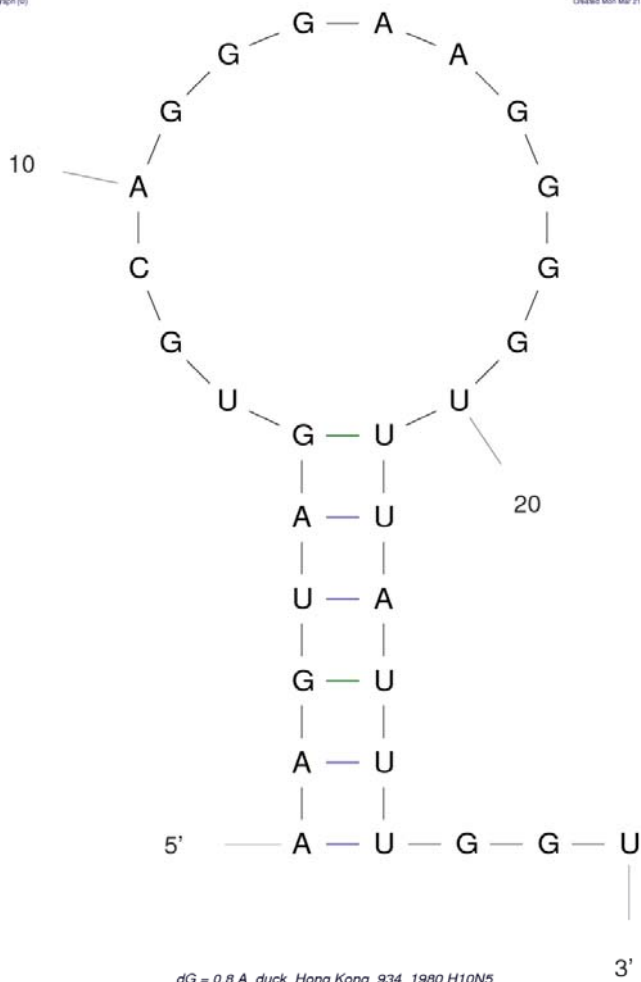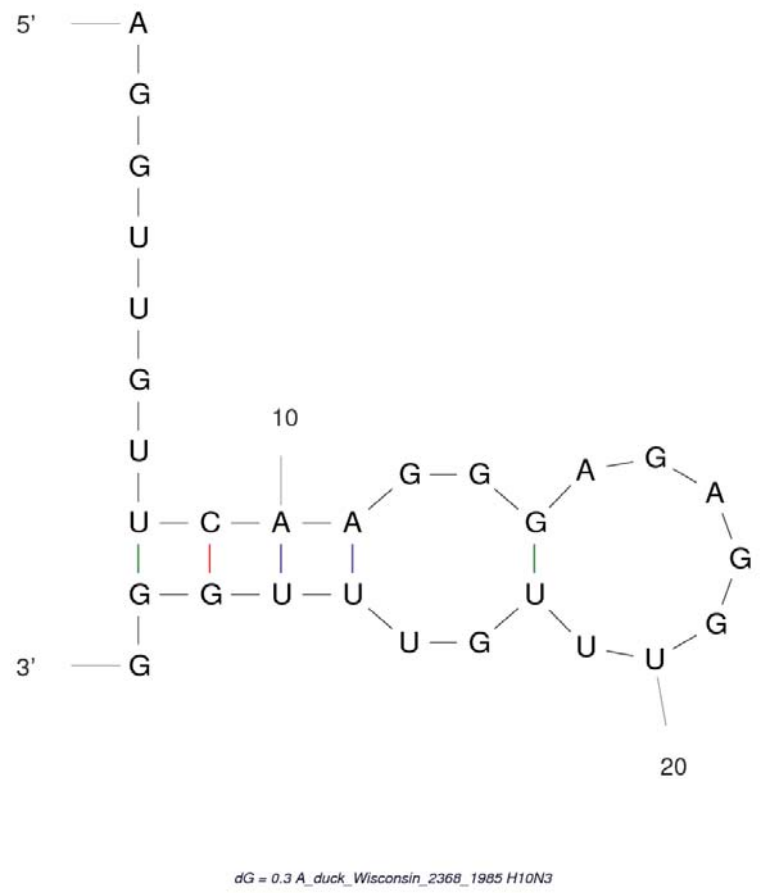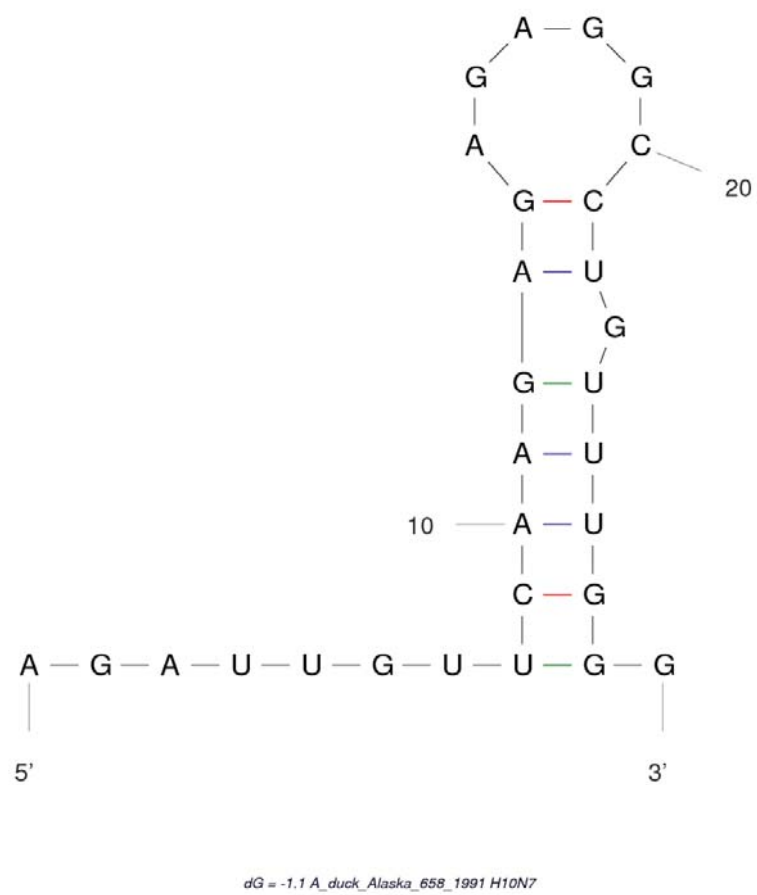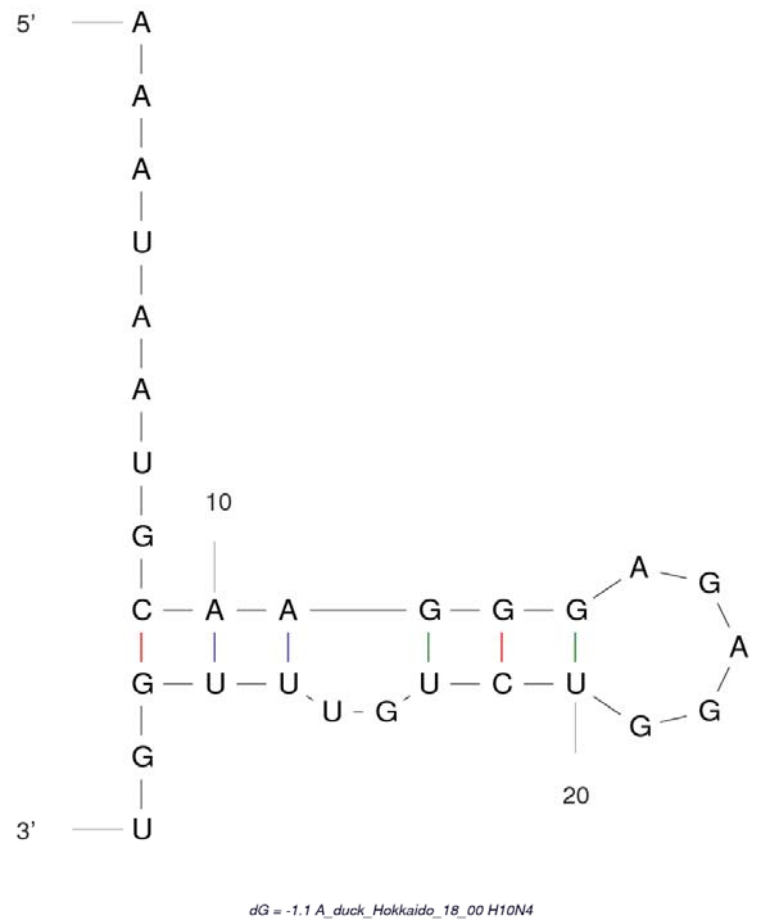



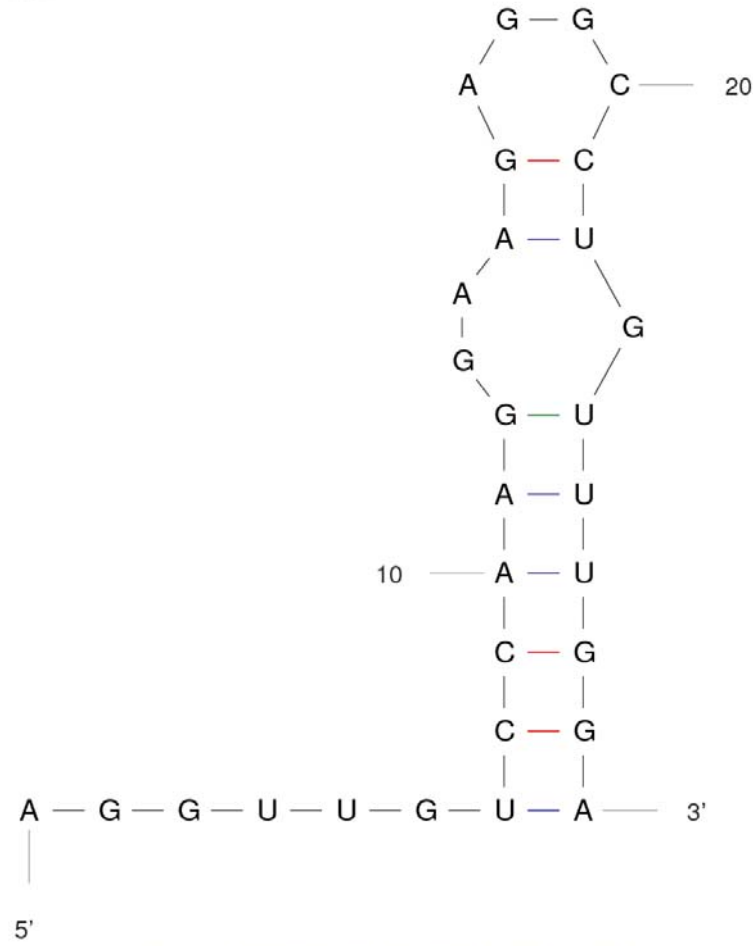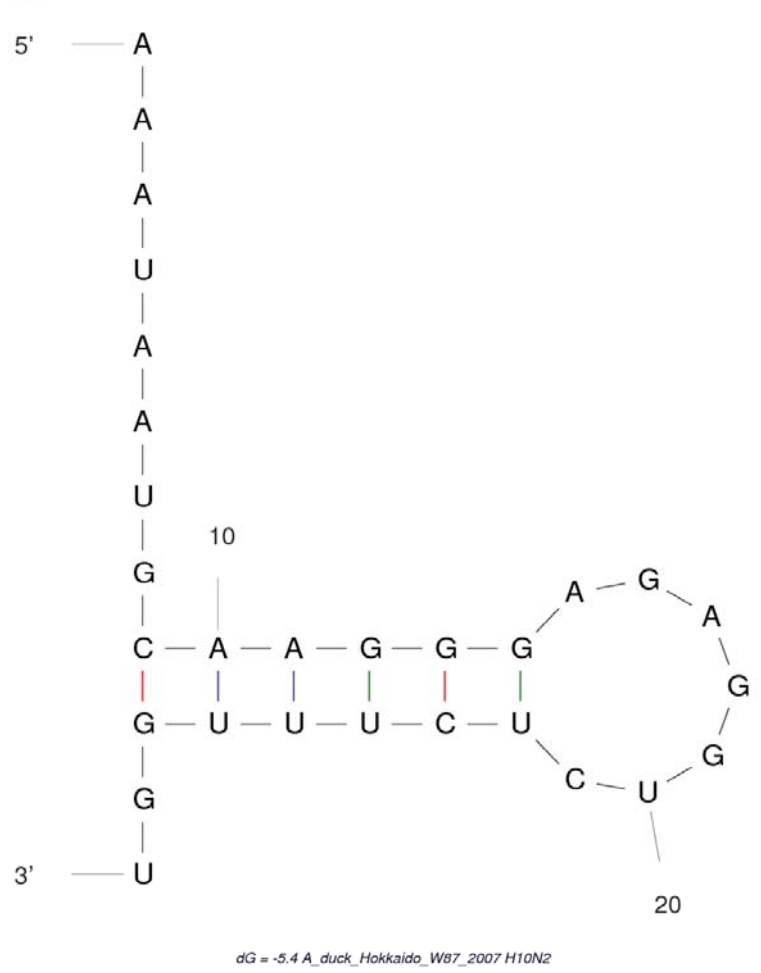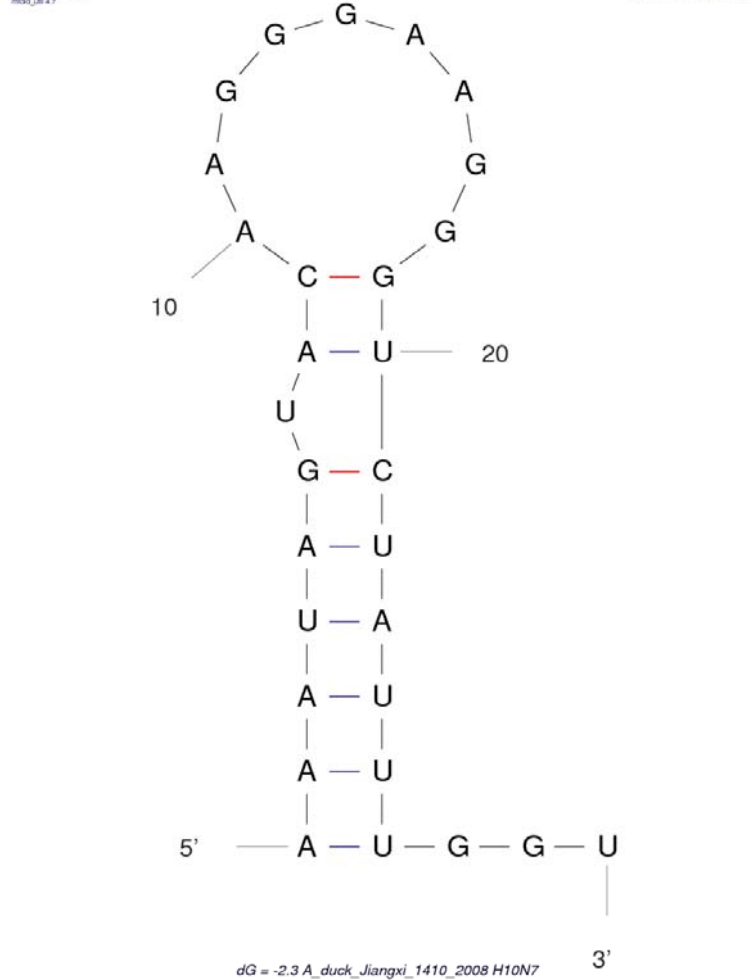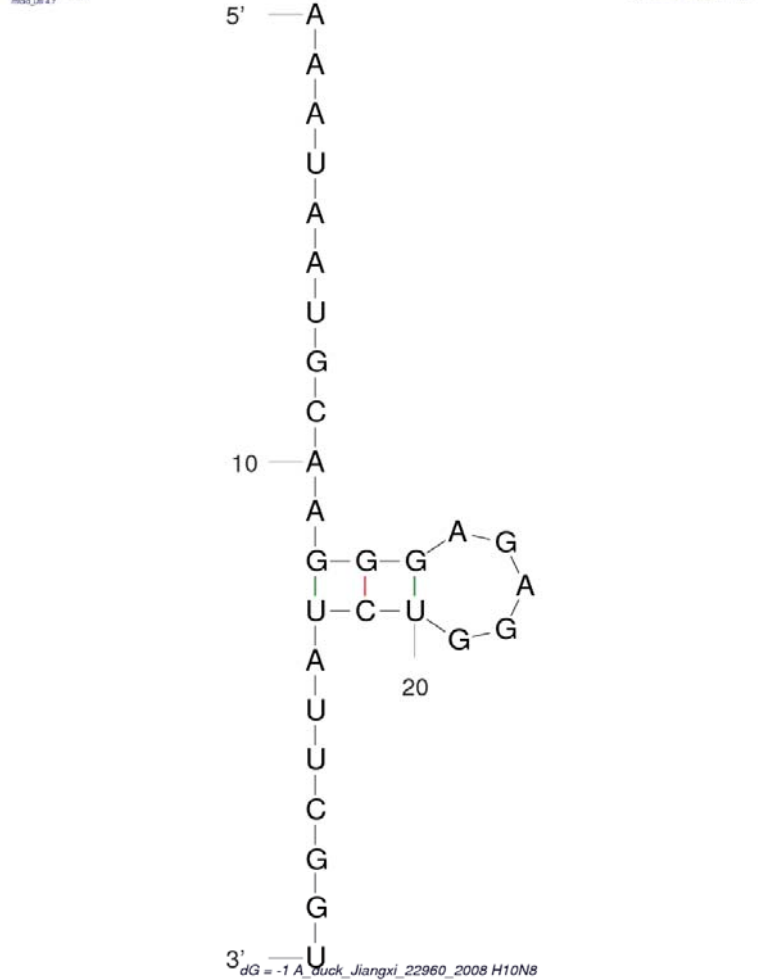

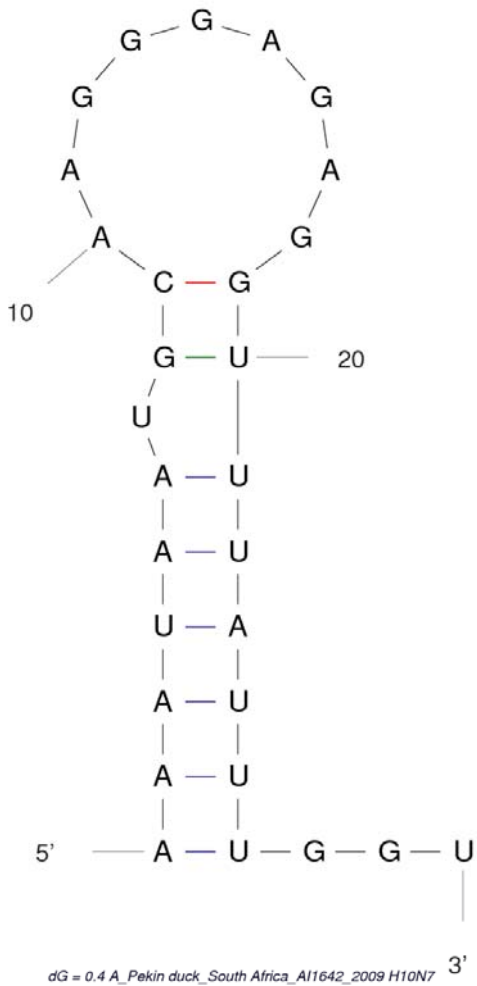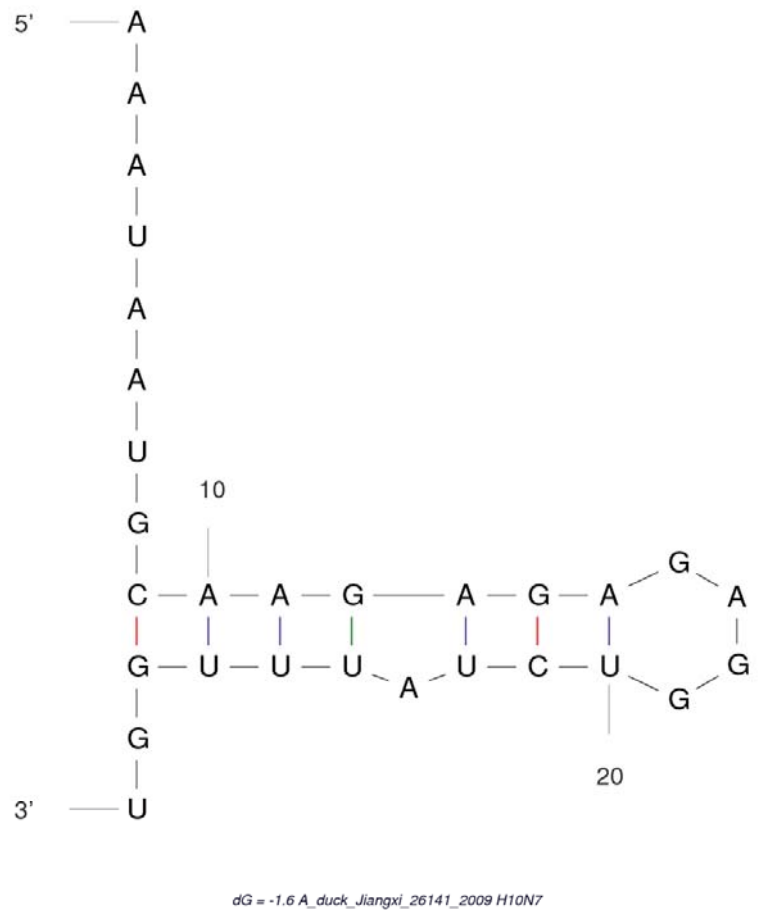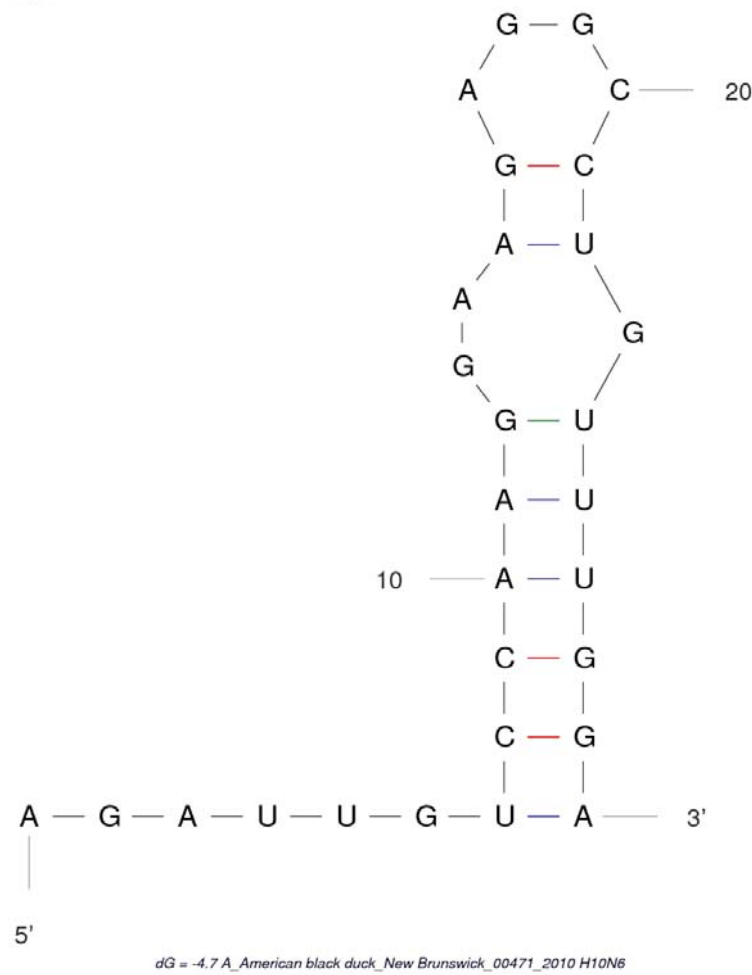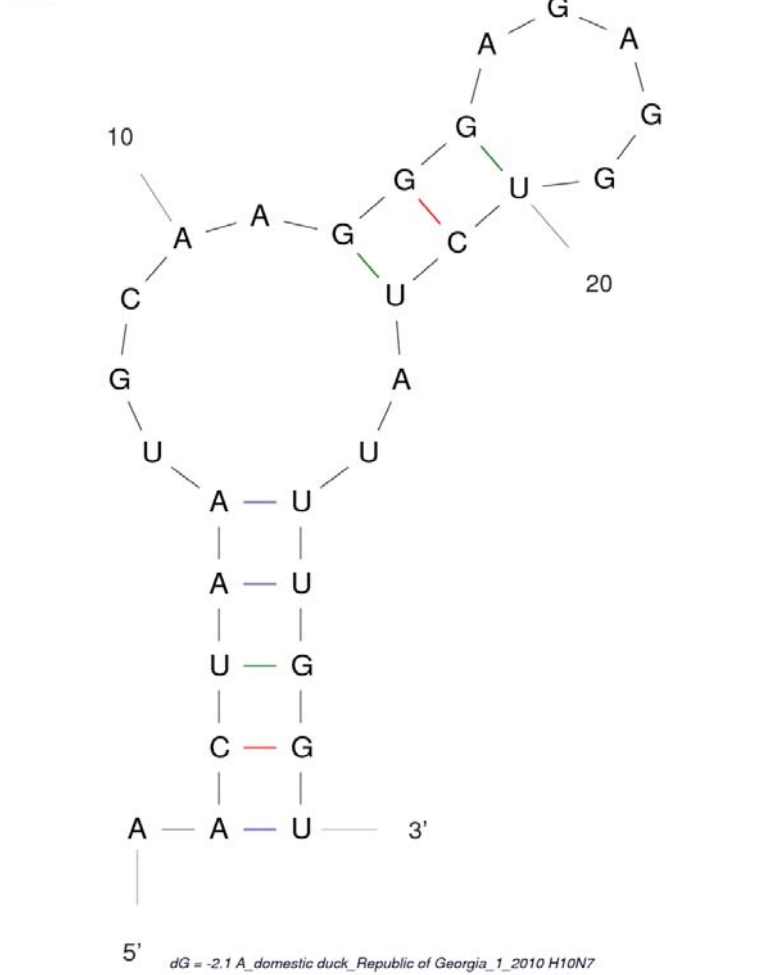

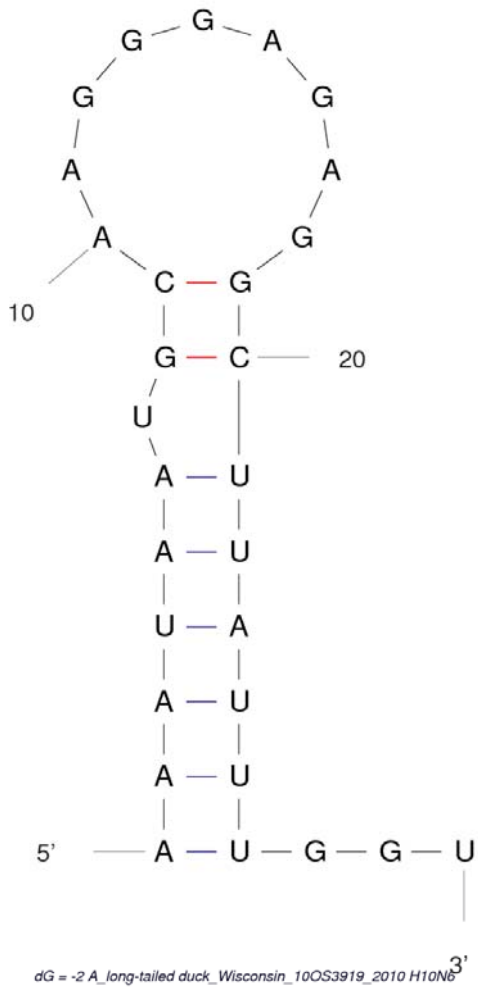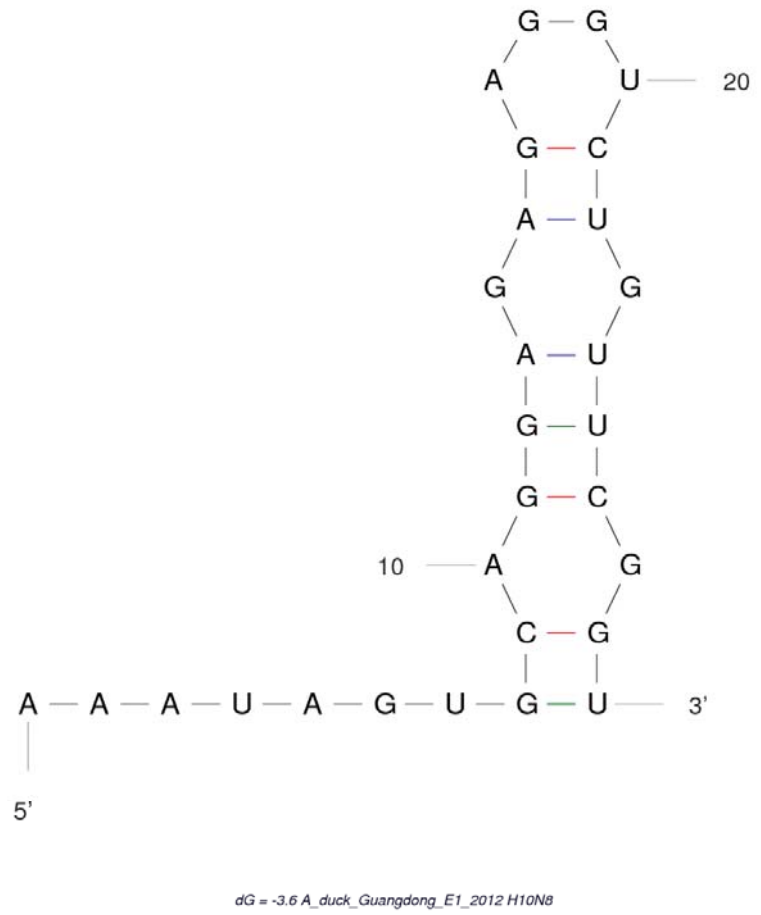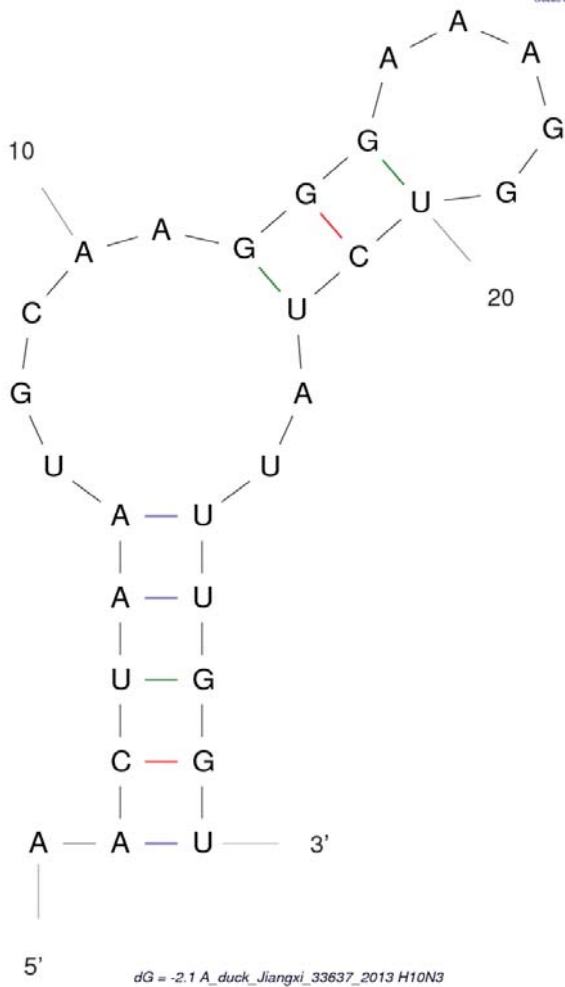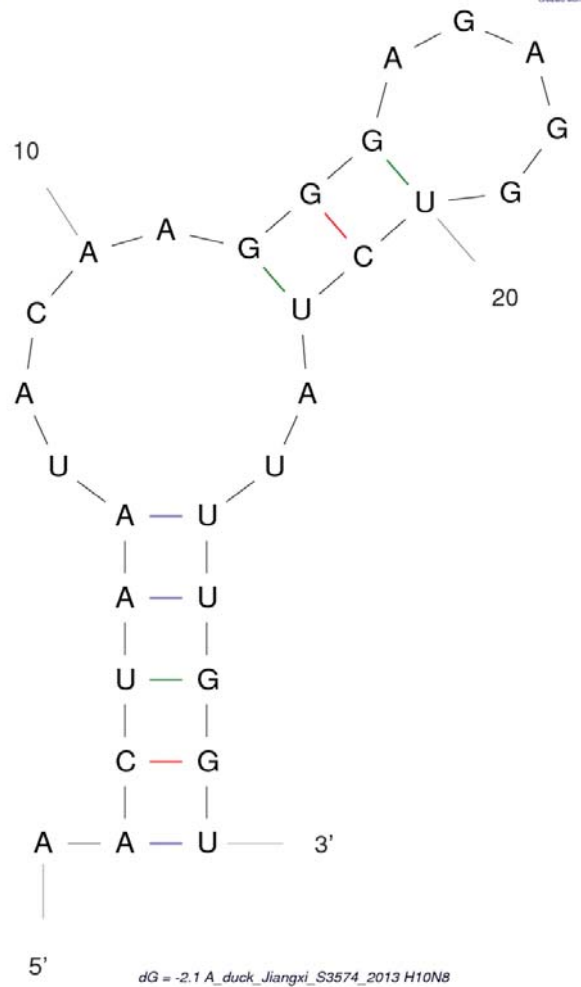

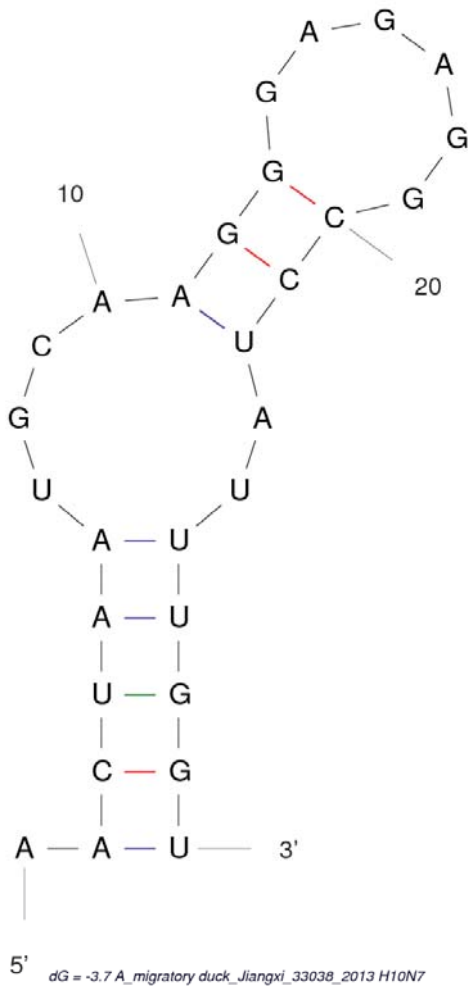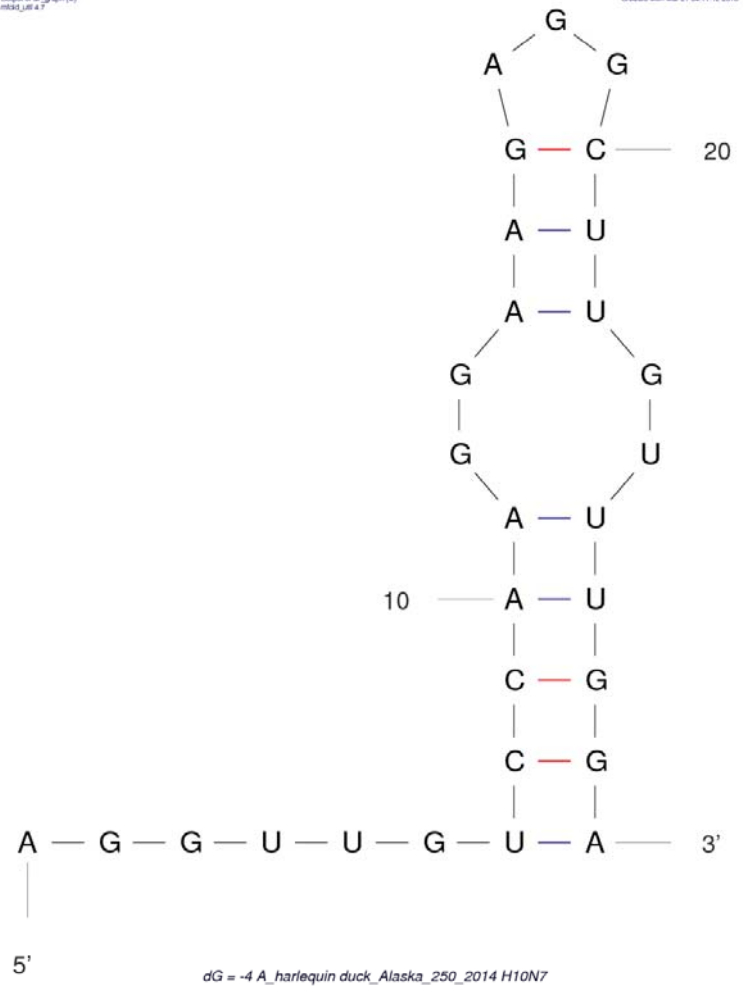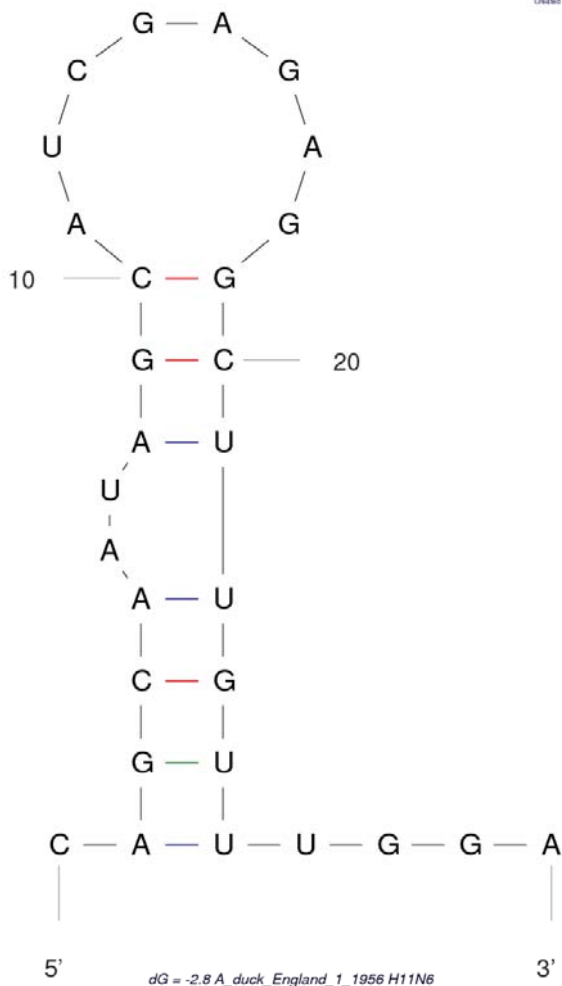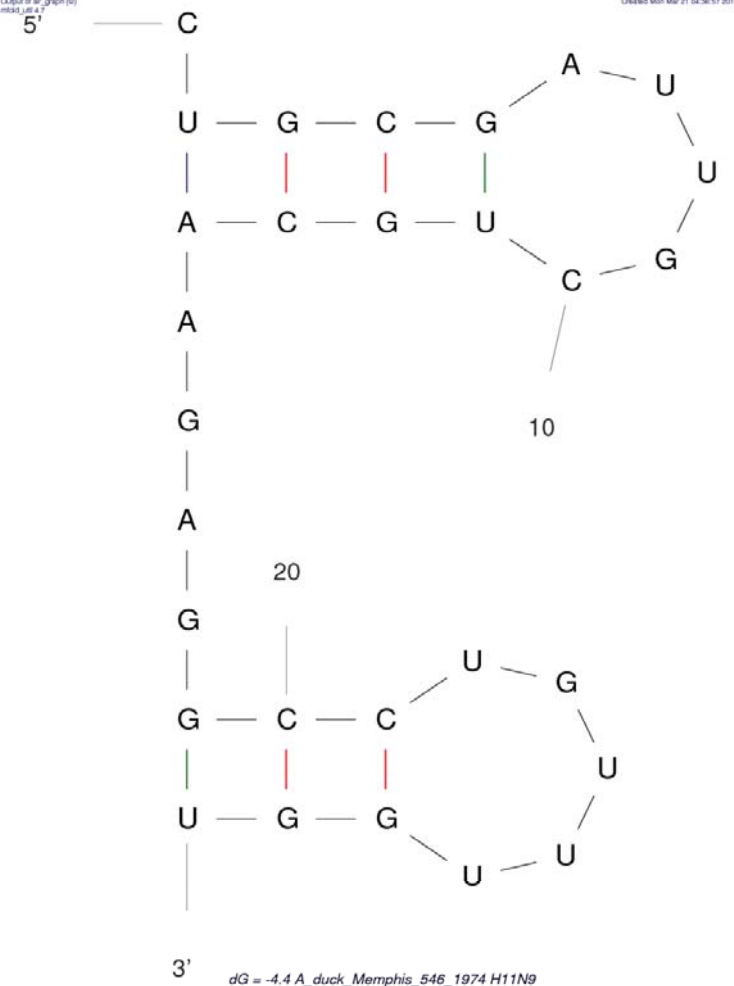

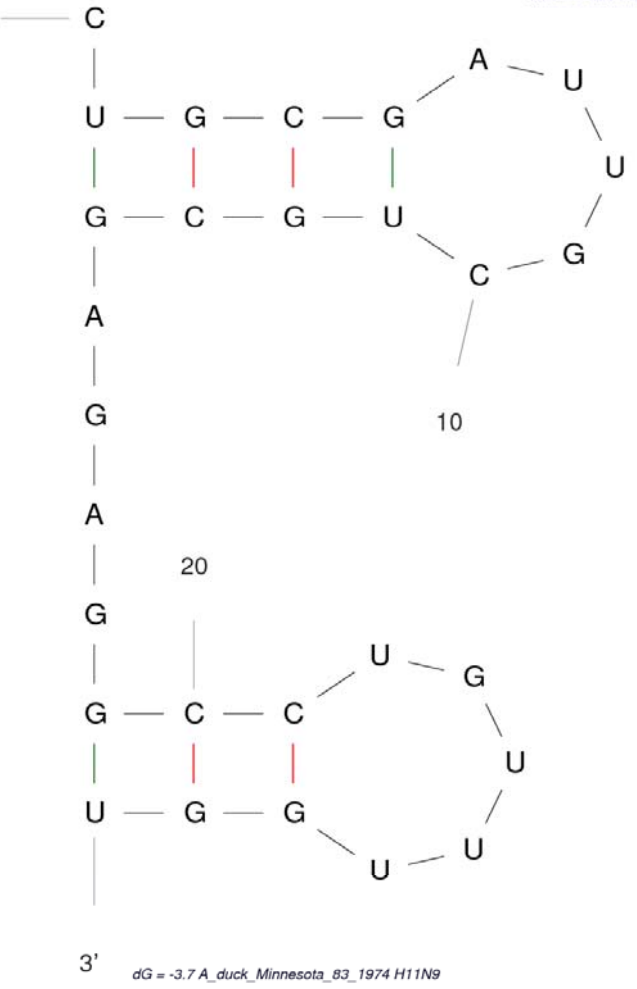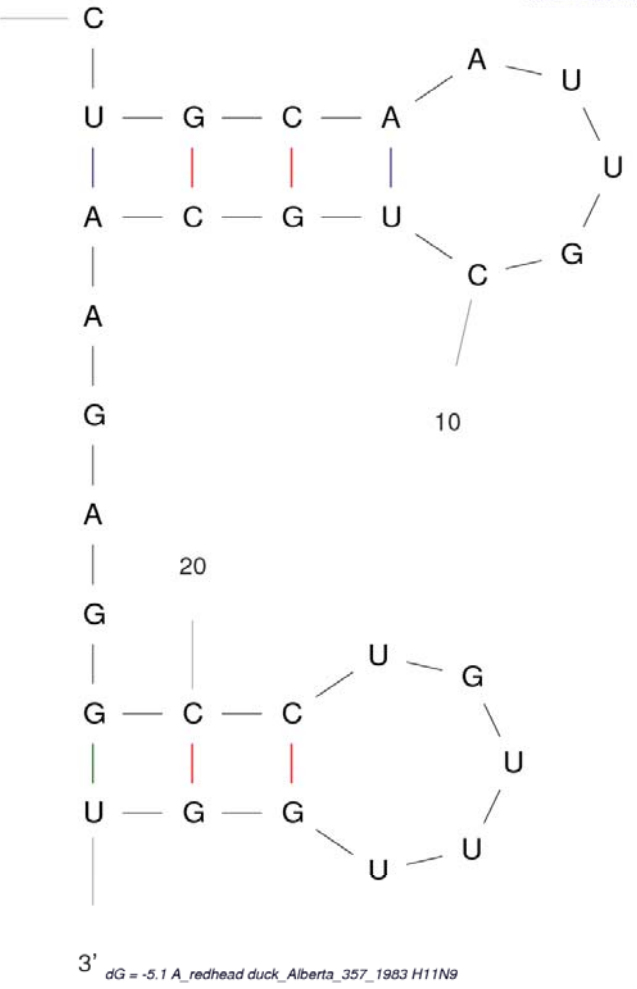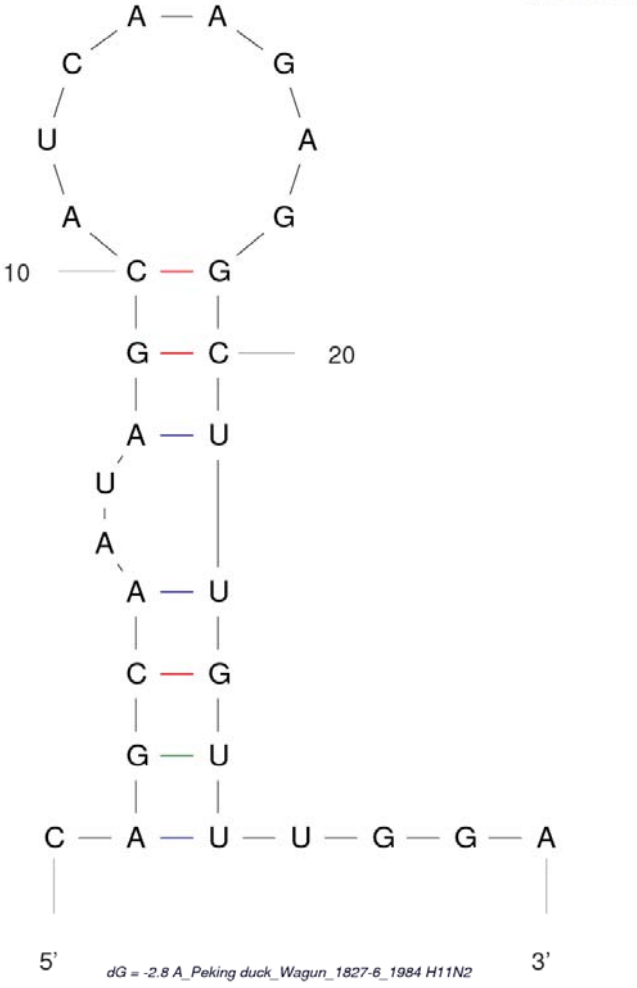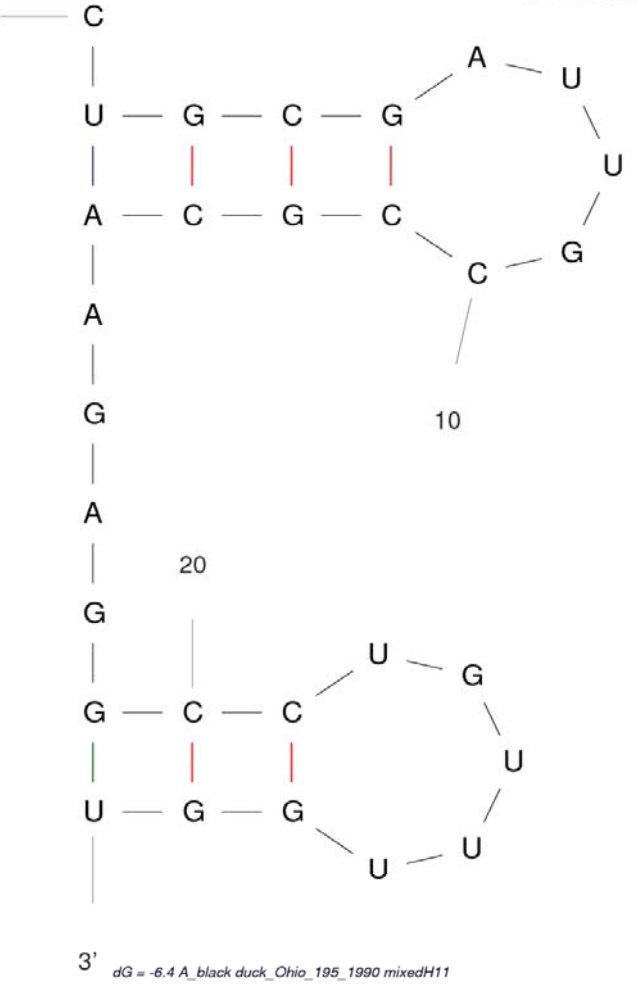



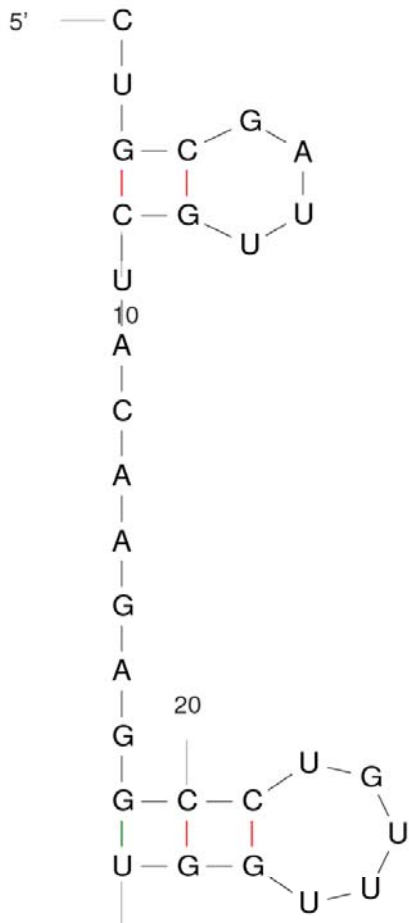

dG = -2.2 A\_duck\_Washington\_663\_1997 H11N9

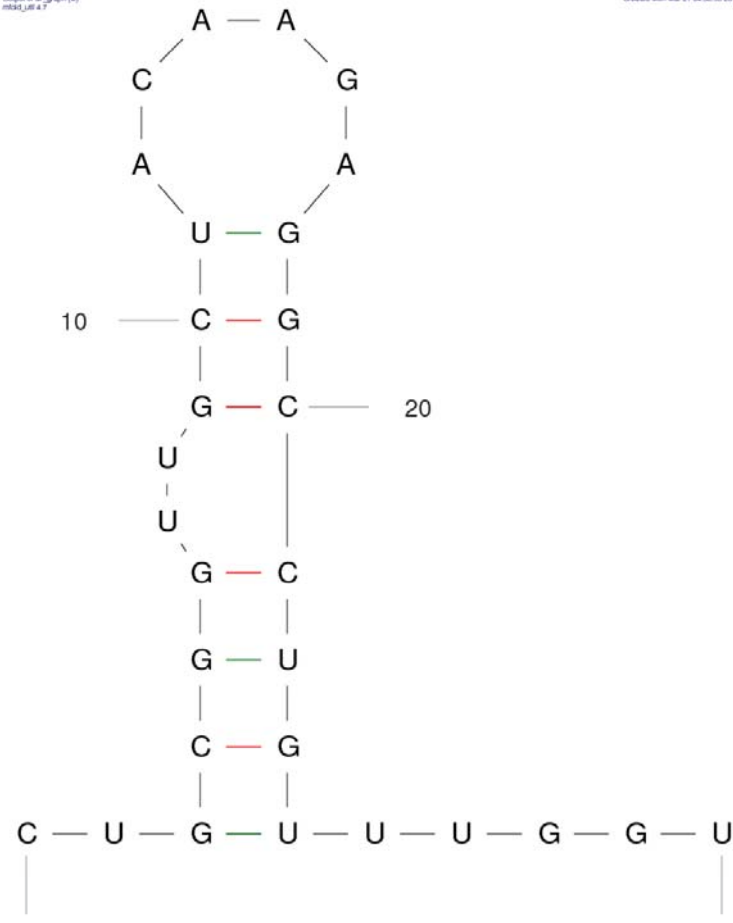

dG = -3.8 A\_black\_duck\_Ohio\_161\_1999 H11N9

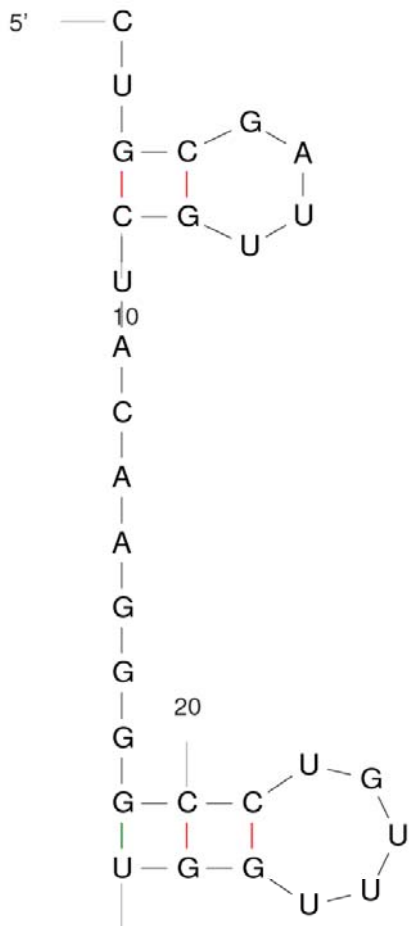

dG = -2.2 R\_call\_duck\_Maryland\_1C48\_2004 H11N3

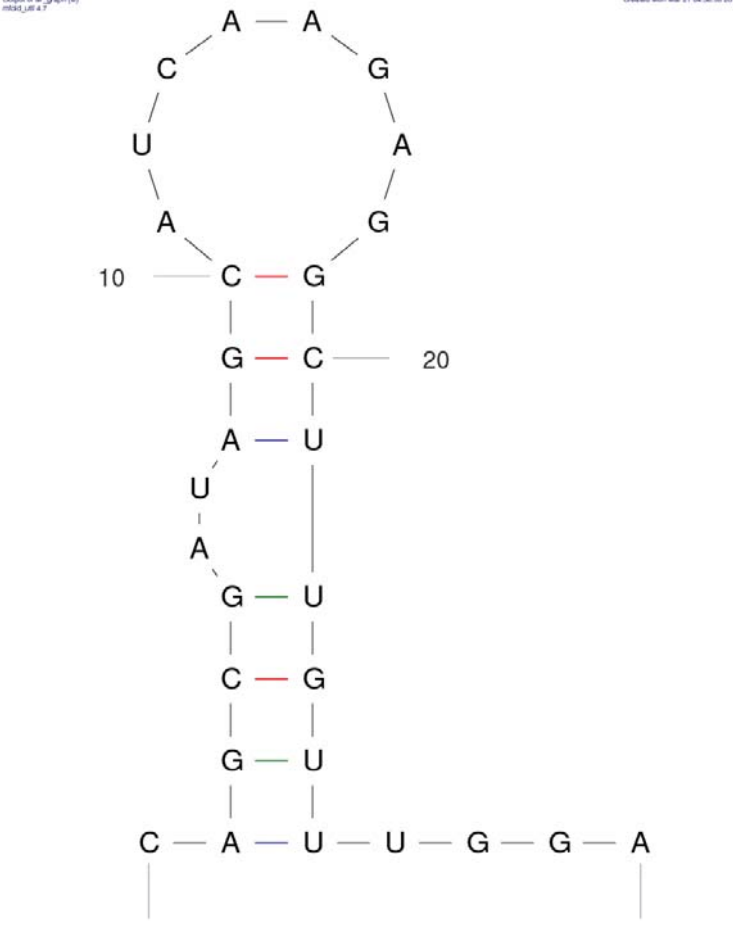

dG = -2.1 A\_spotbill\_duck\_Xuyi\_6\_2005 H11N2

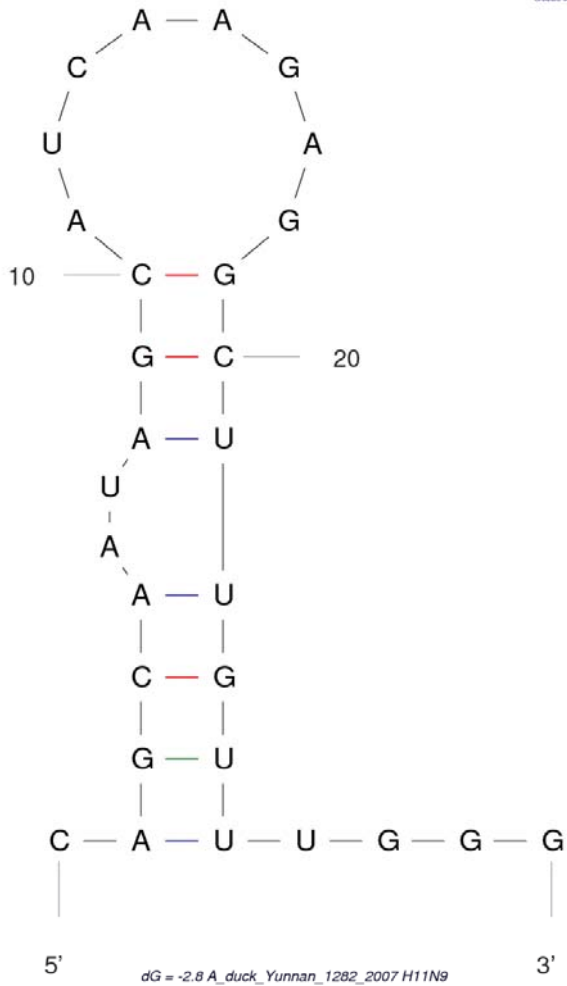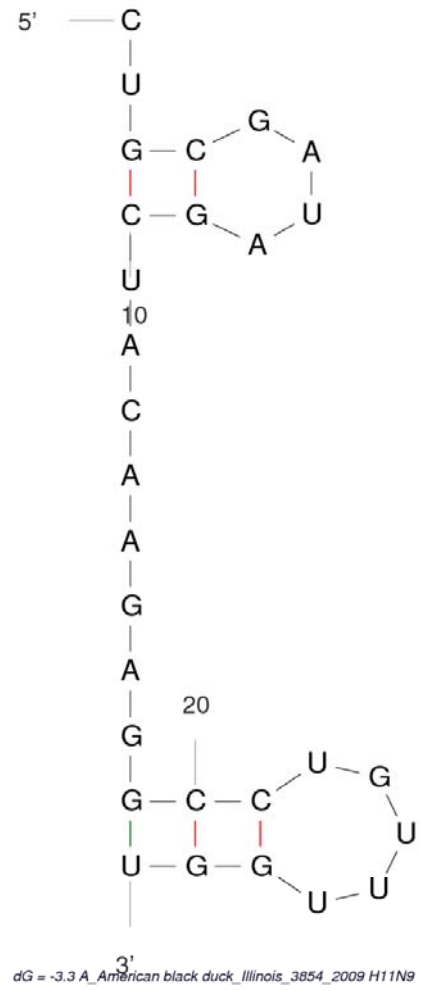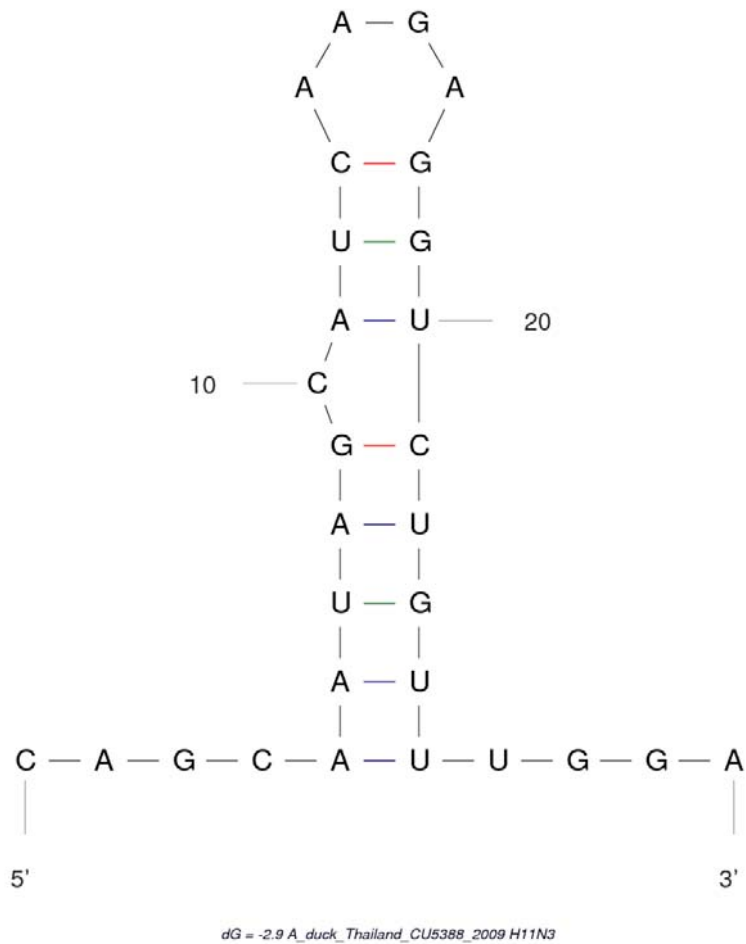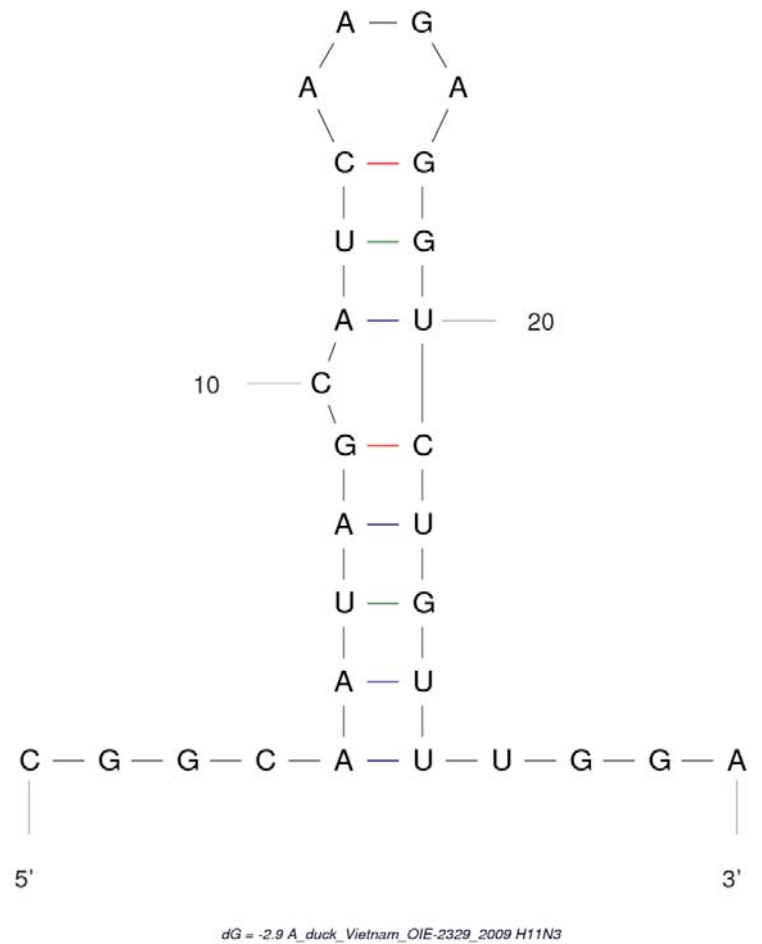

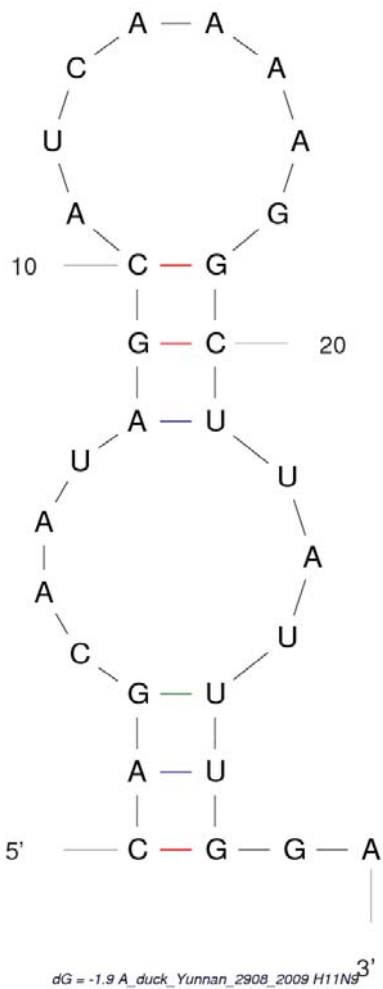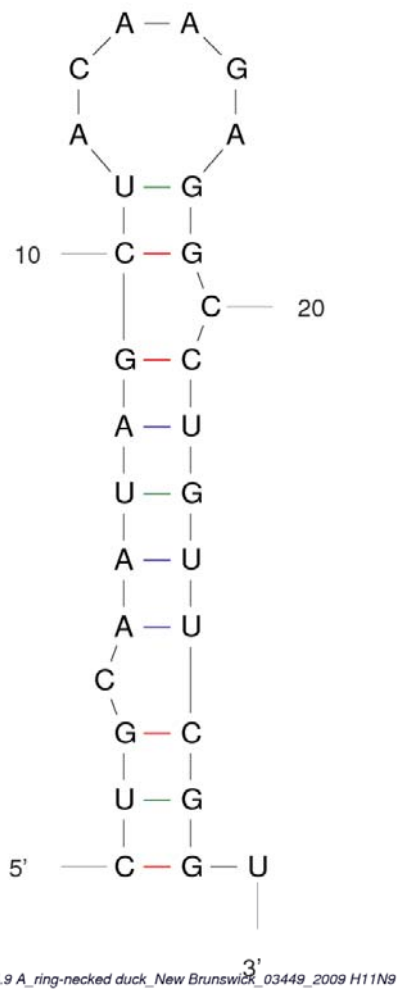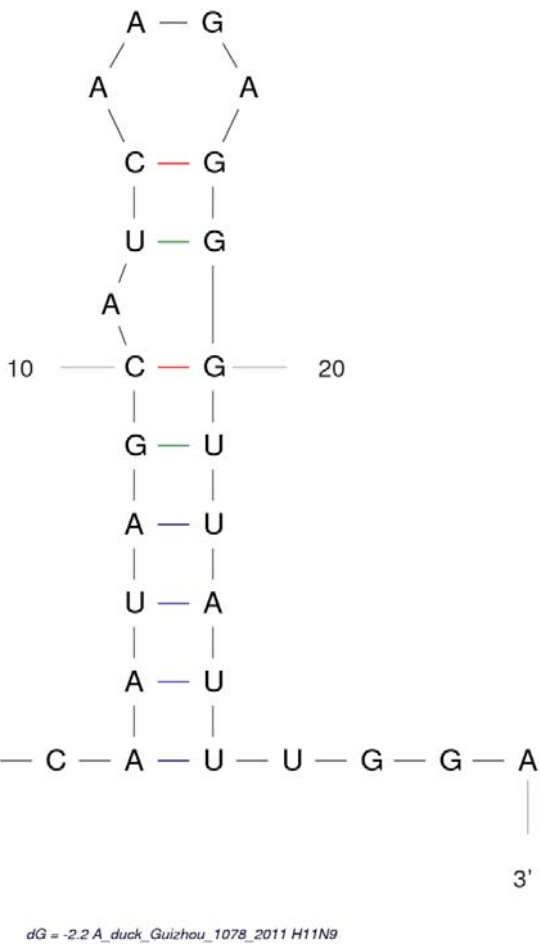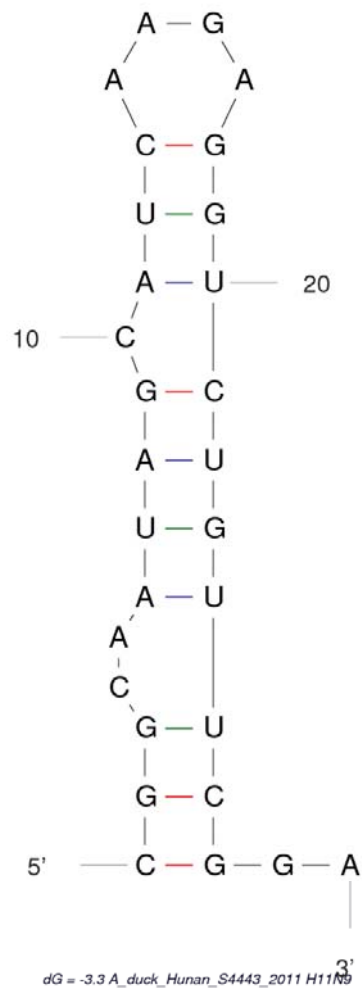

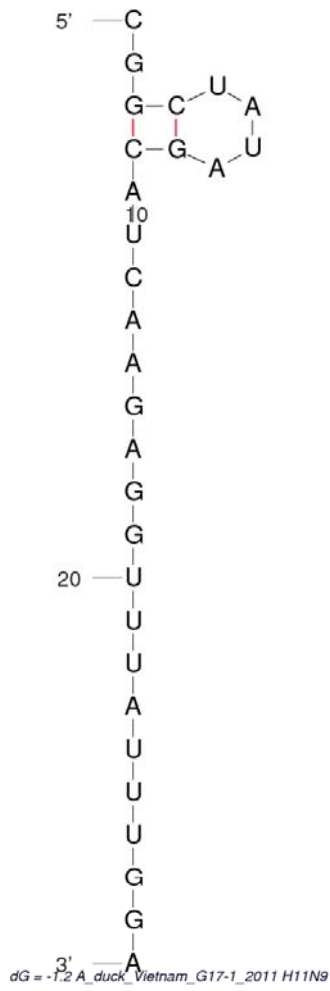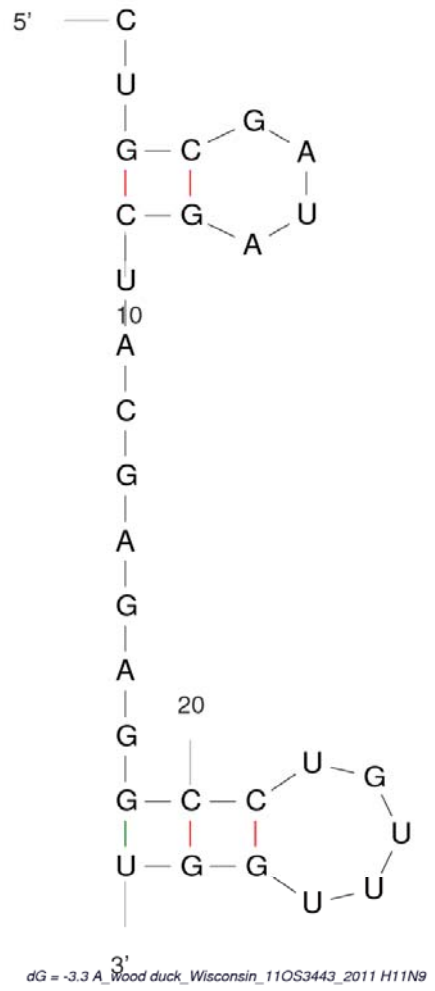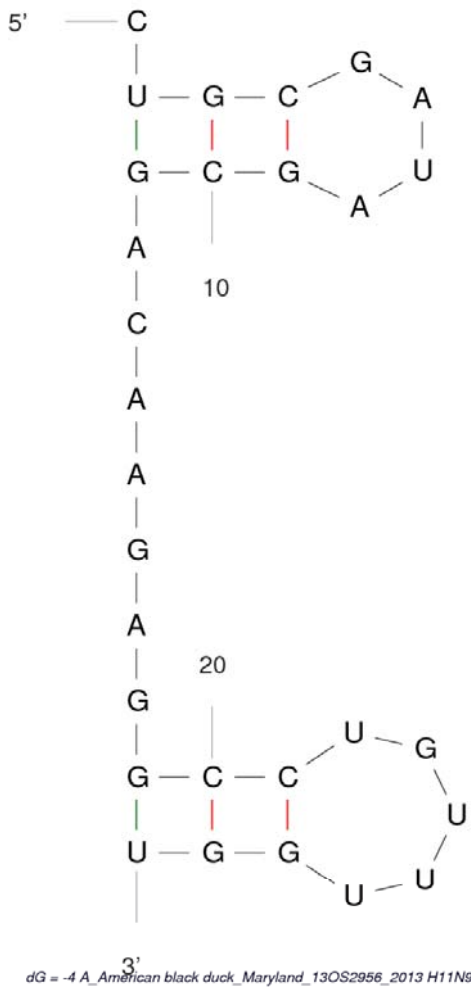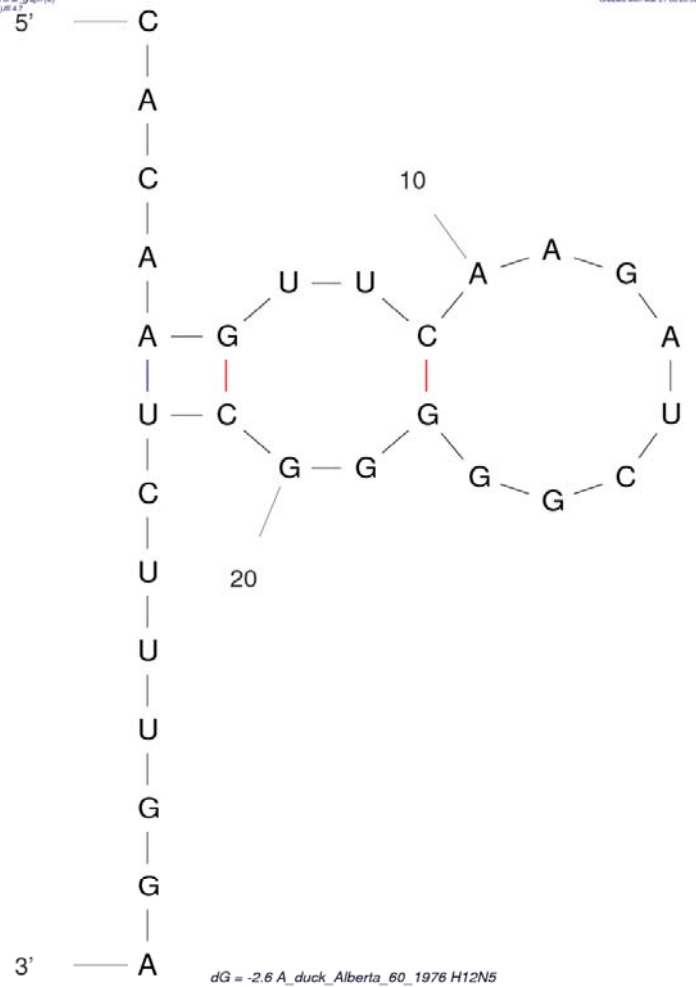

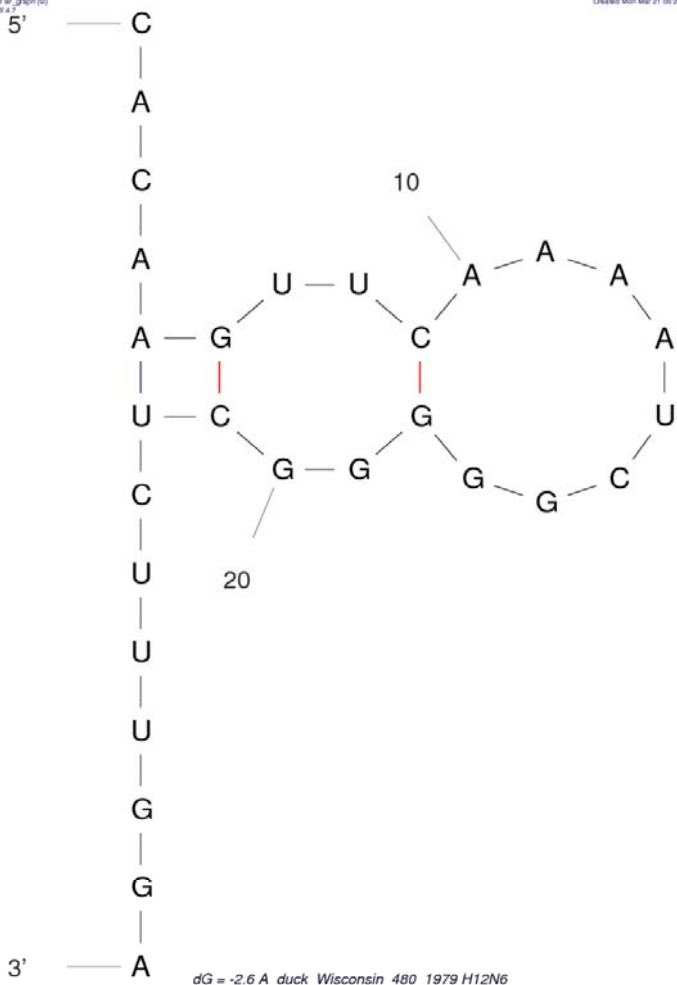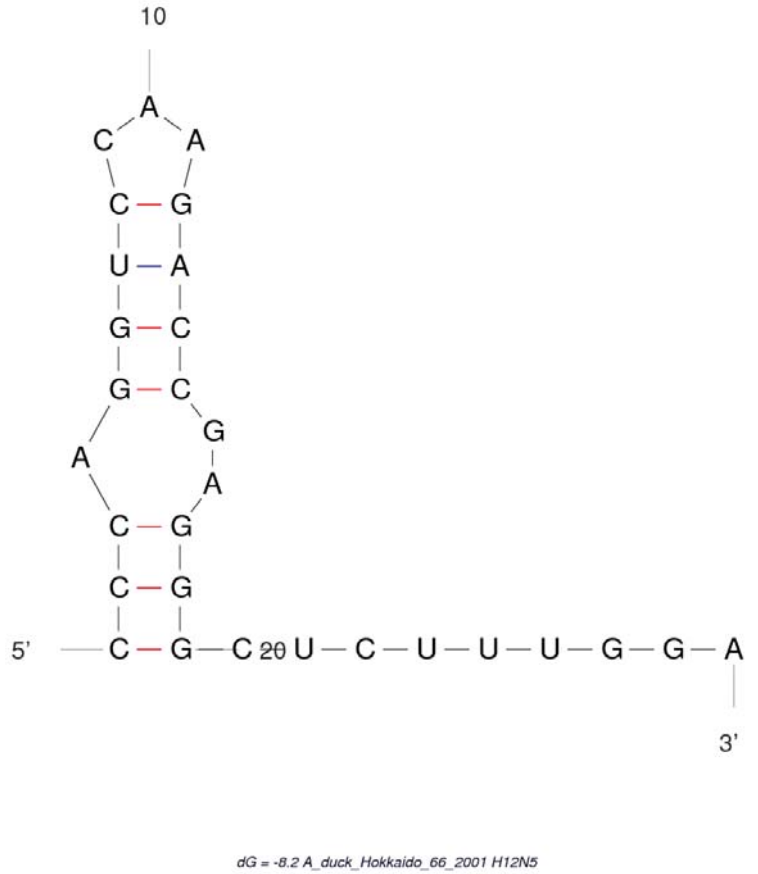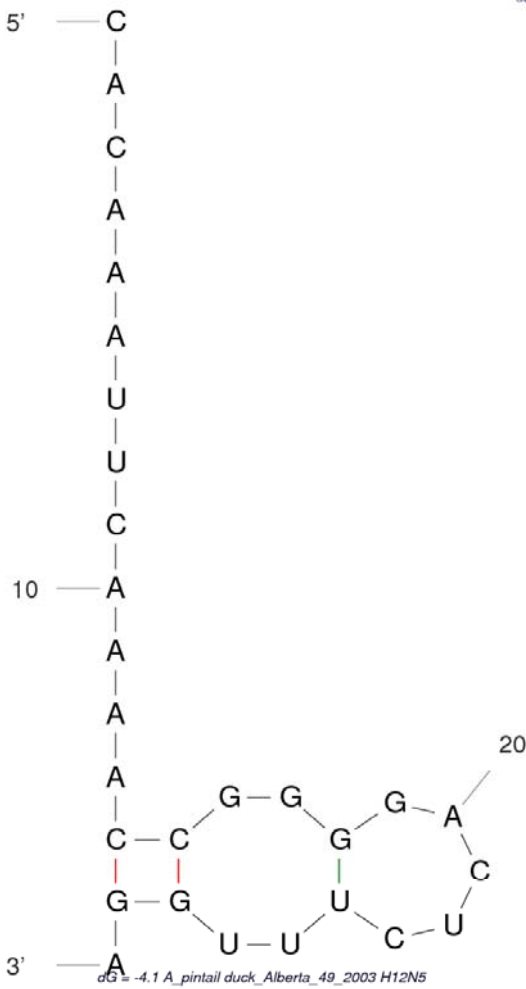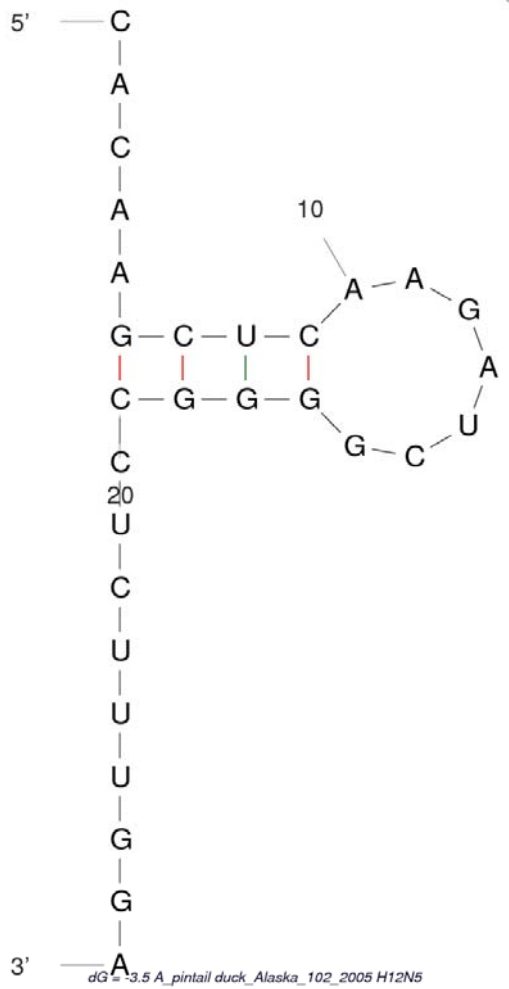

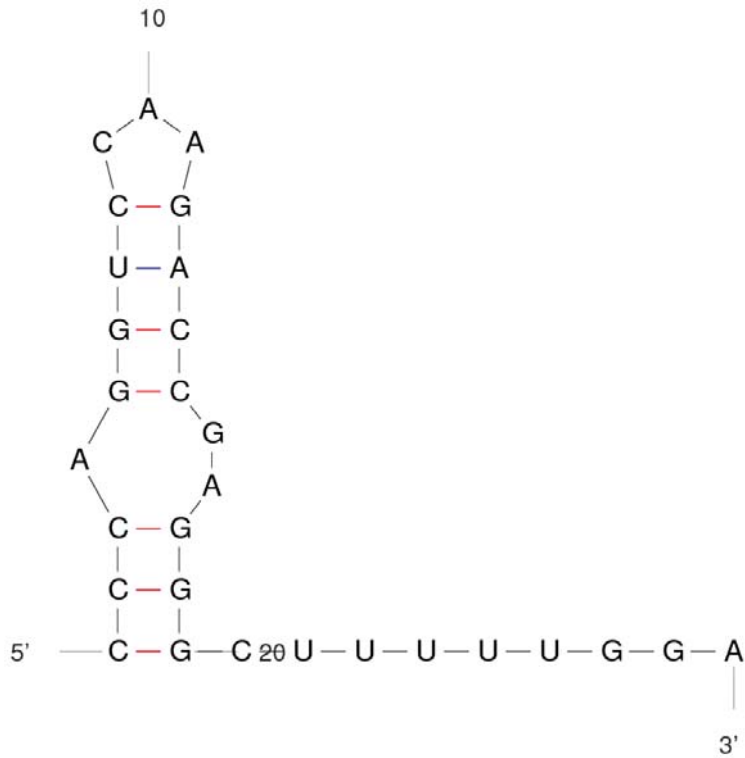

dG = -8.2 A\_duck\_Tsukuba\_212\_2006 H12N5

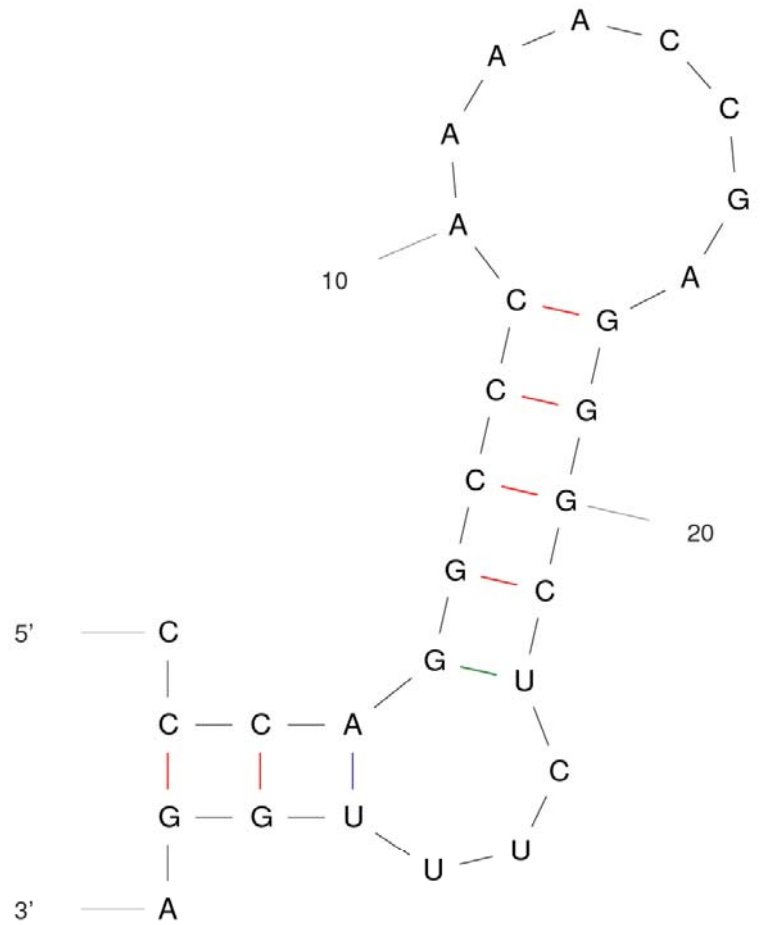

dG = -10.7 A\_duck\_Vietnam\_G18\_2009 H12N5

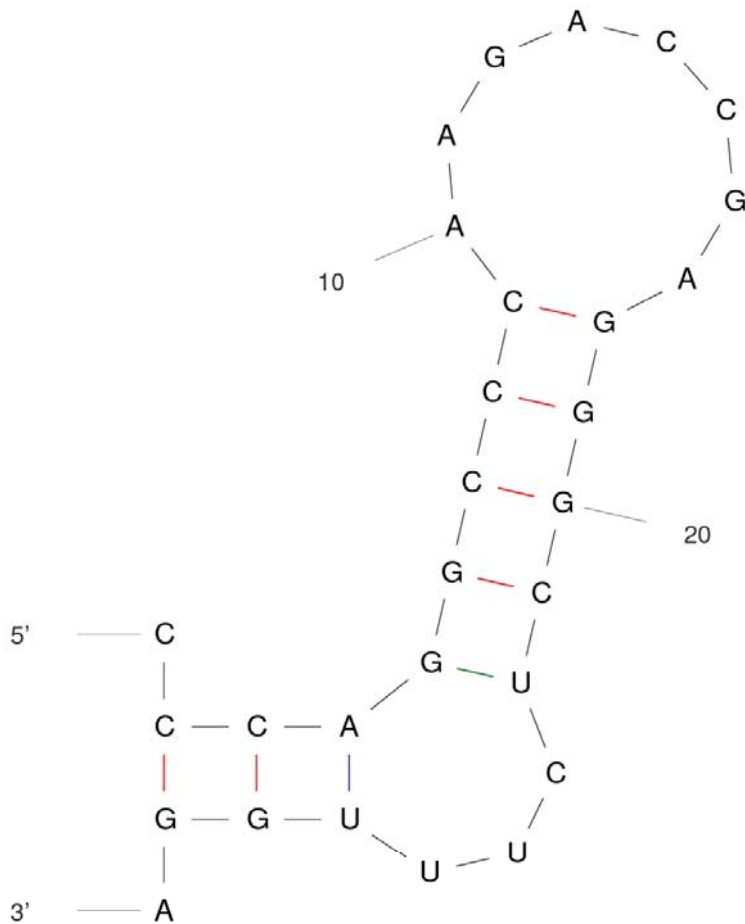

dG = -10.7 A\_duck\_Hokkaido\_W26\_2012 H12N1

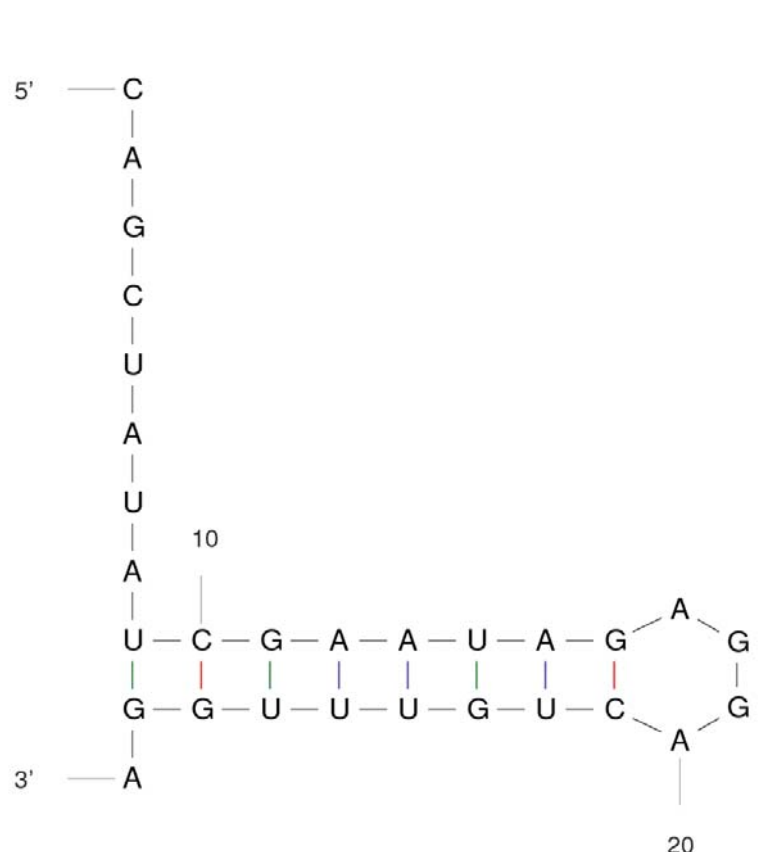

dG = -5.4 A\_duck\_Siberia\_272\_1998 H13N6

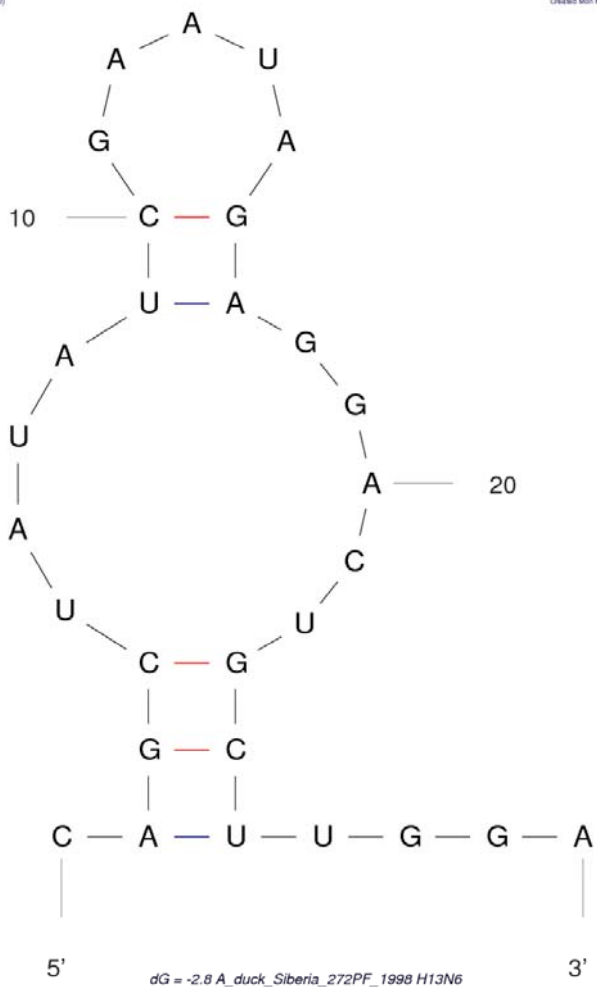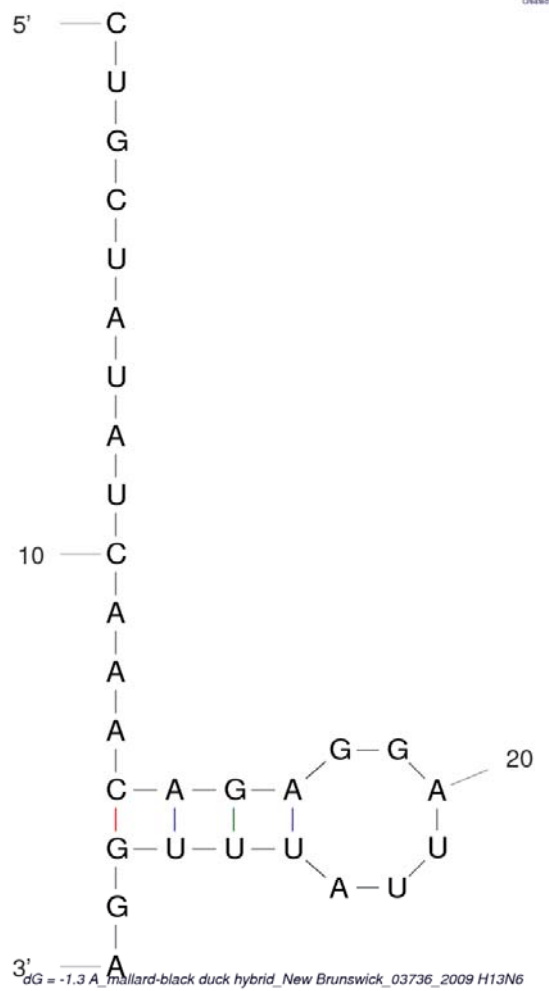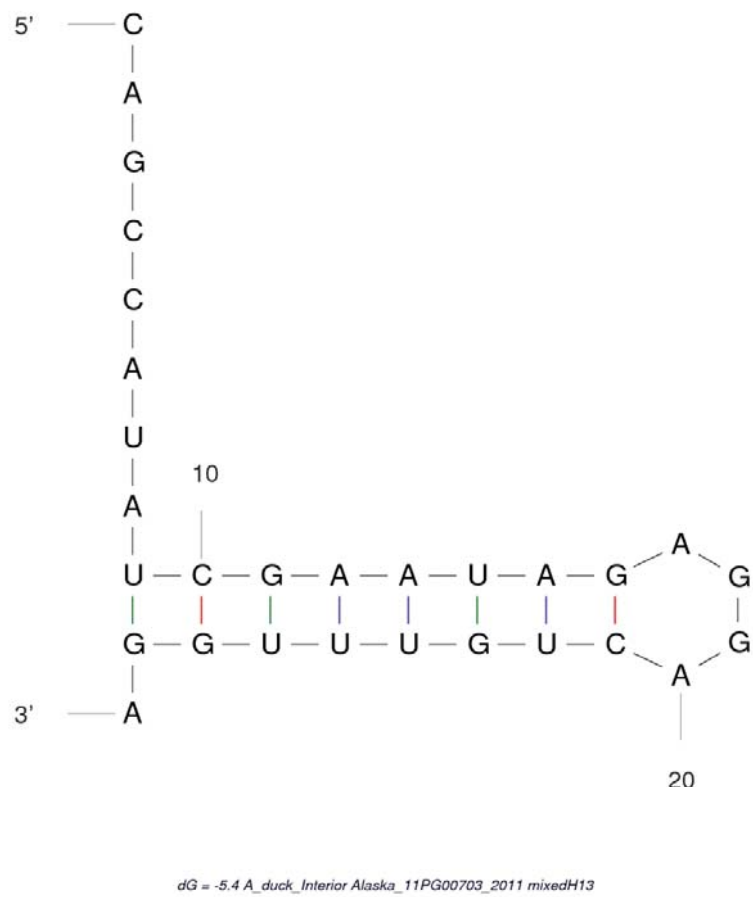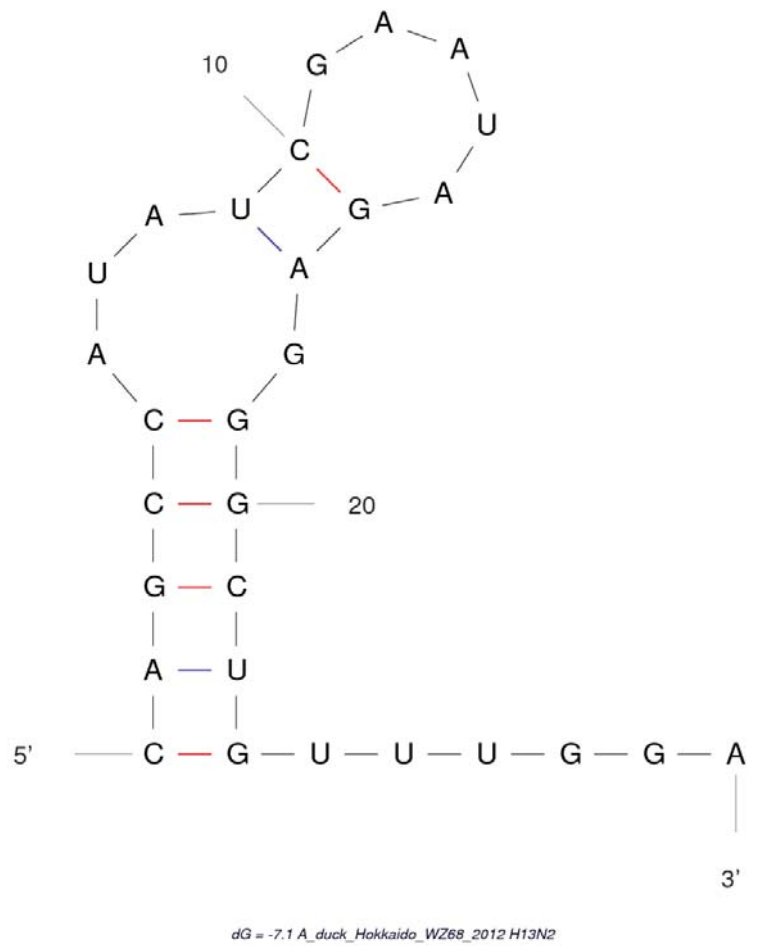

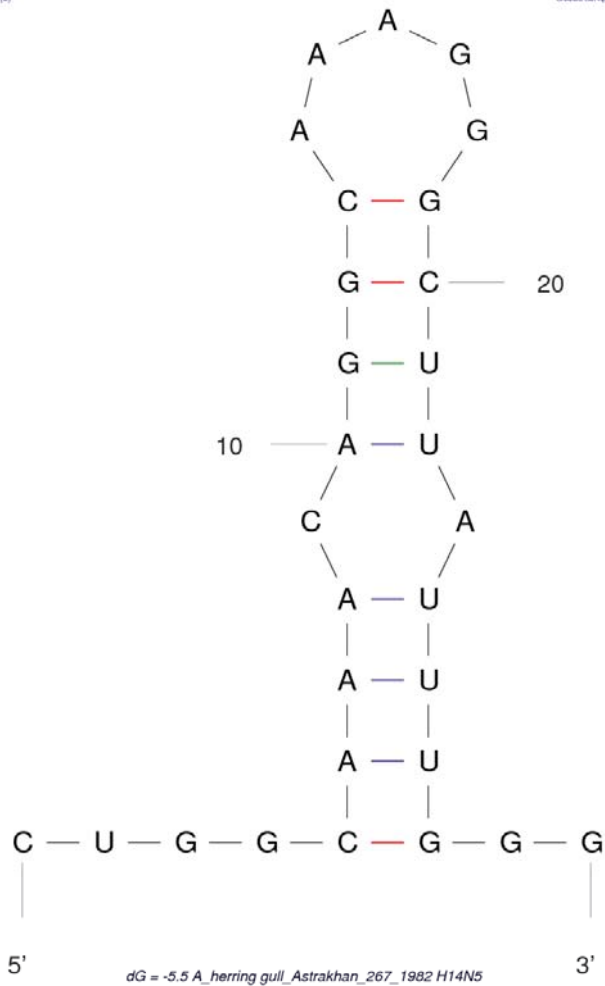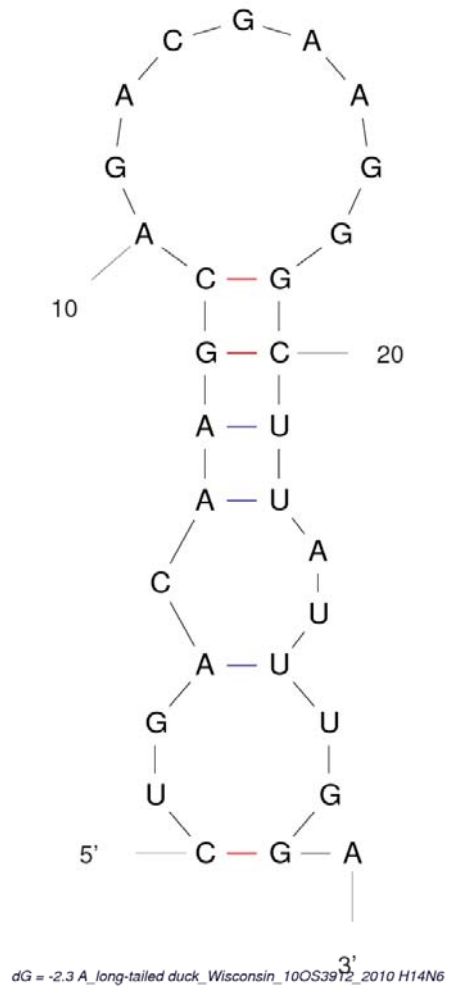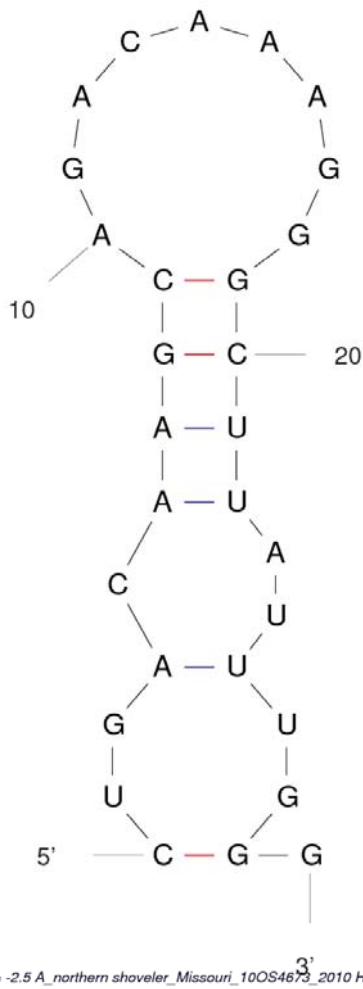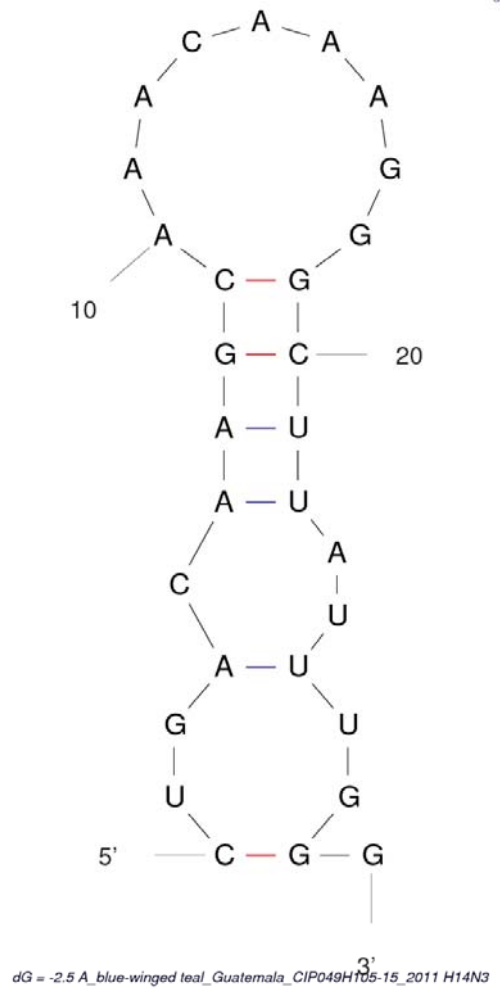



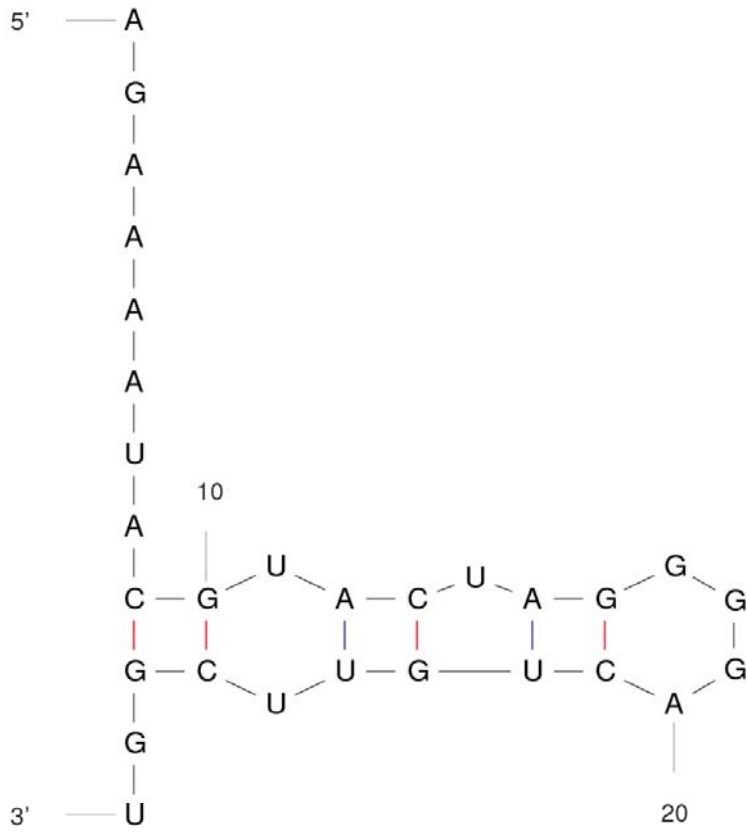

dG = -5.3 A\_Australian shelduck\_Western Australia\_1762\_1979 H15N9

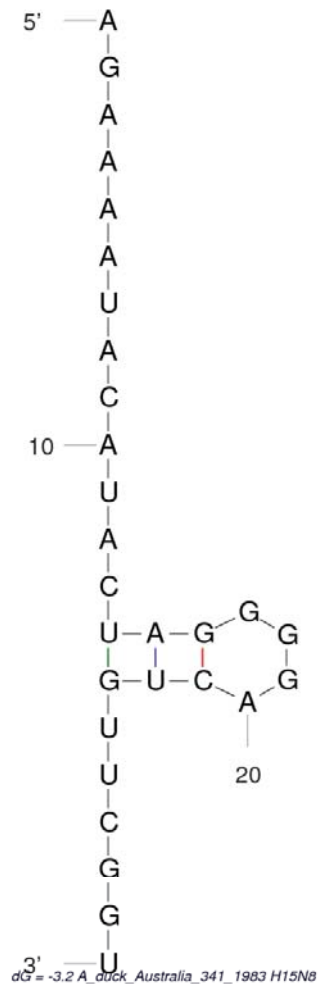

dG = -3.2 A\_duck\_Australia\_341\_1983 H15N8

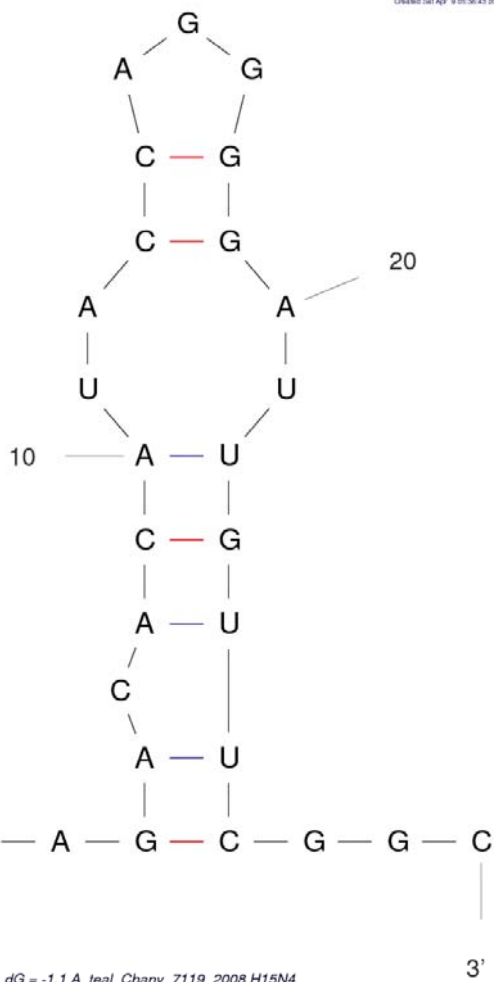

dG = -1.1 A\_teal\_Chany\_7119\_2008 H15N4

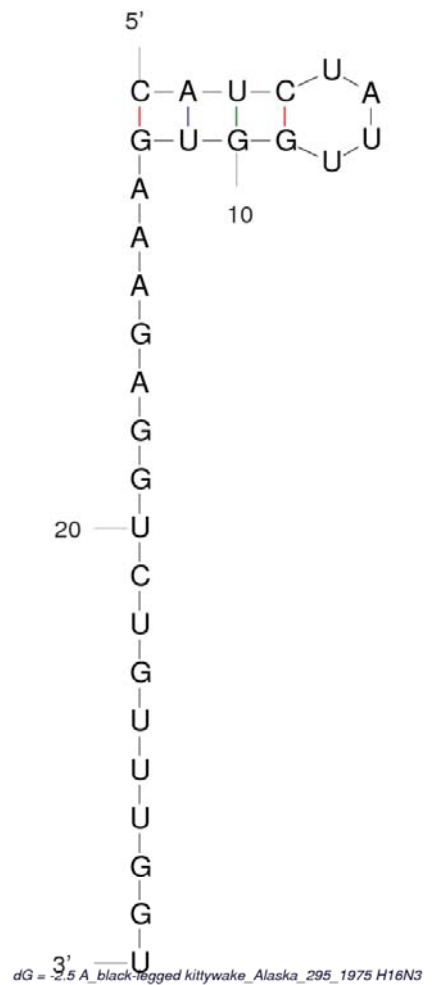

dG = -2.5 A\_black-legged kittiwake\_Alaska\_295\_1975 H16N3

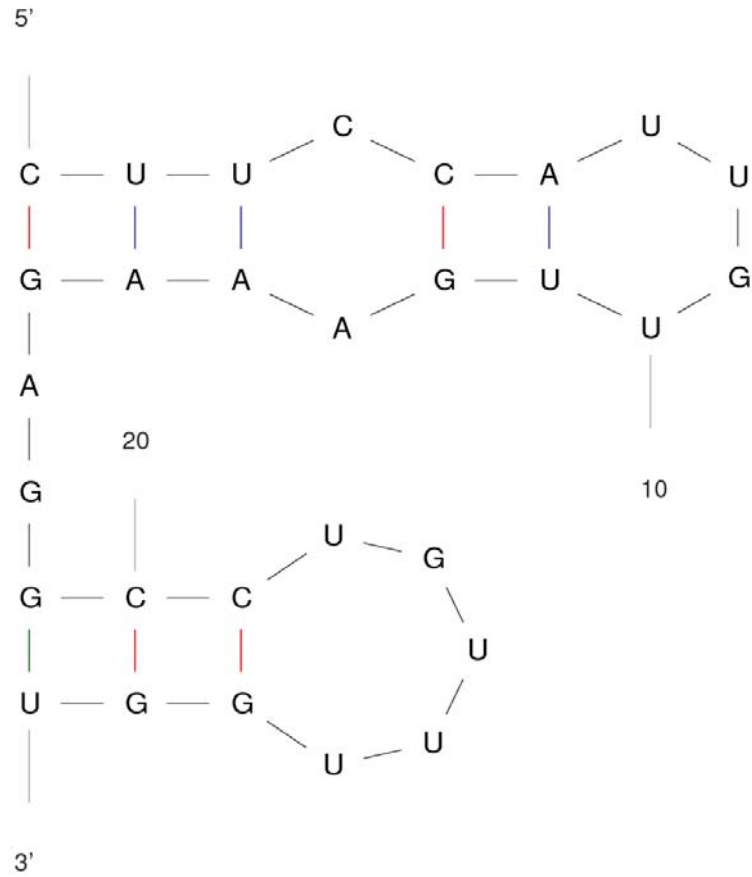

dG = -2.7 A\_little tern\_Gurjev\_779\_83 H16N3

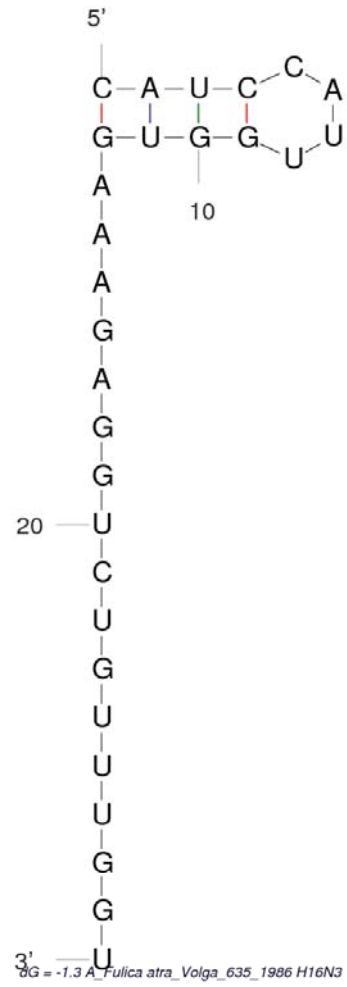

dG = -1.3 A\_Fulica atra\_Volga\_635\_1986 H16N3

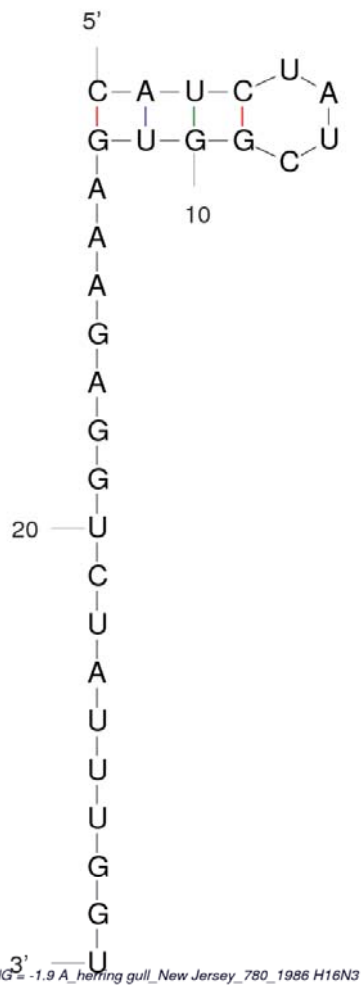

dG = -1.9 A\_herring gull\_New Jersey\_780\_1986 H16N3

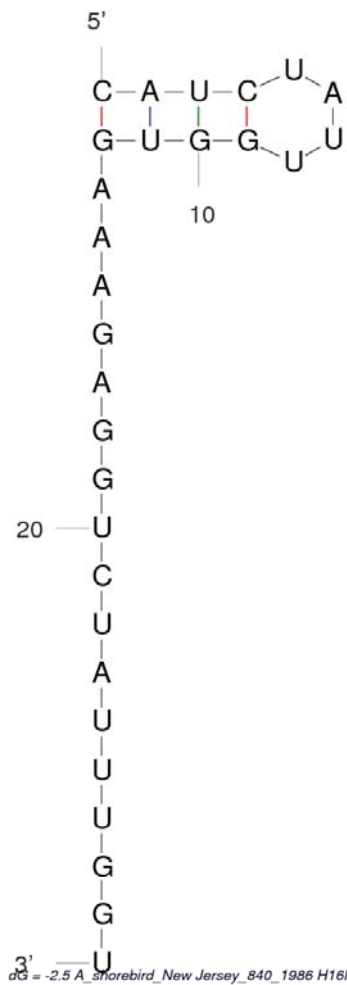

dG = -2.5 A\_shorebird\_New Jersey\_840\_1986 H16N3

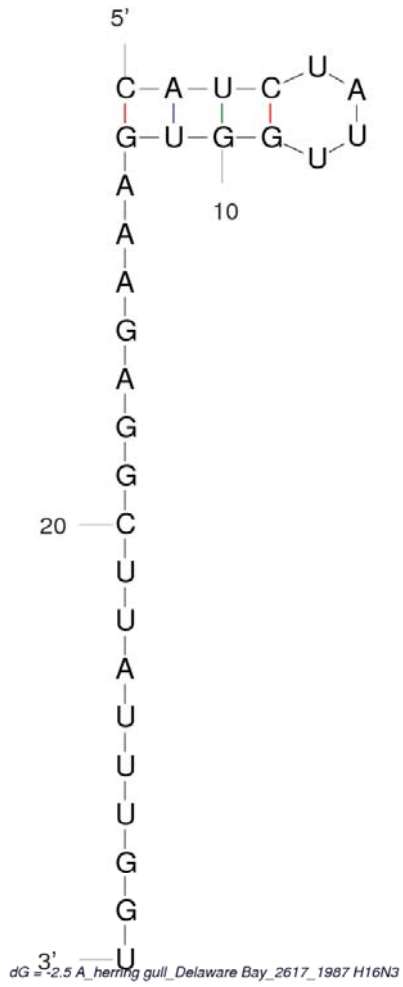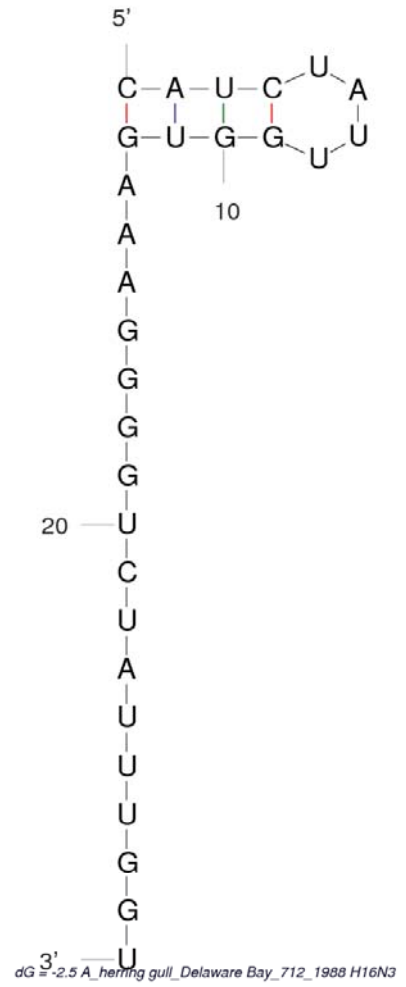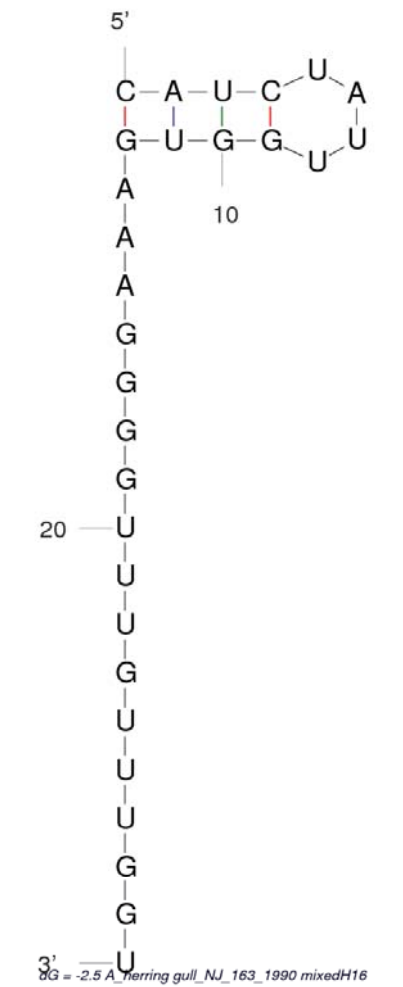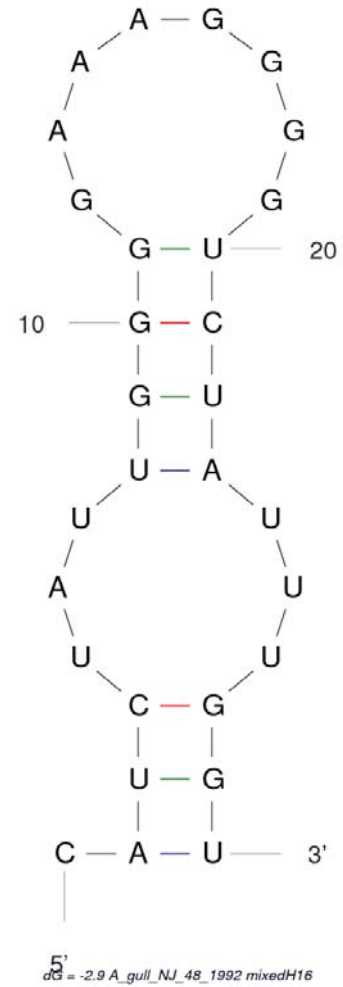

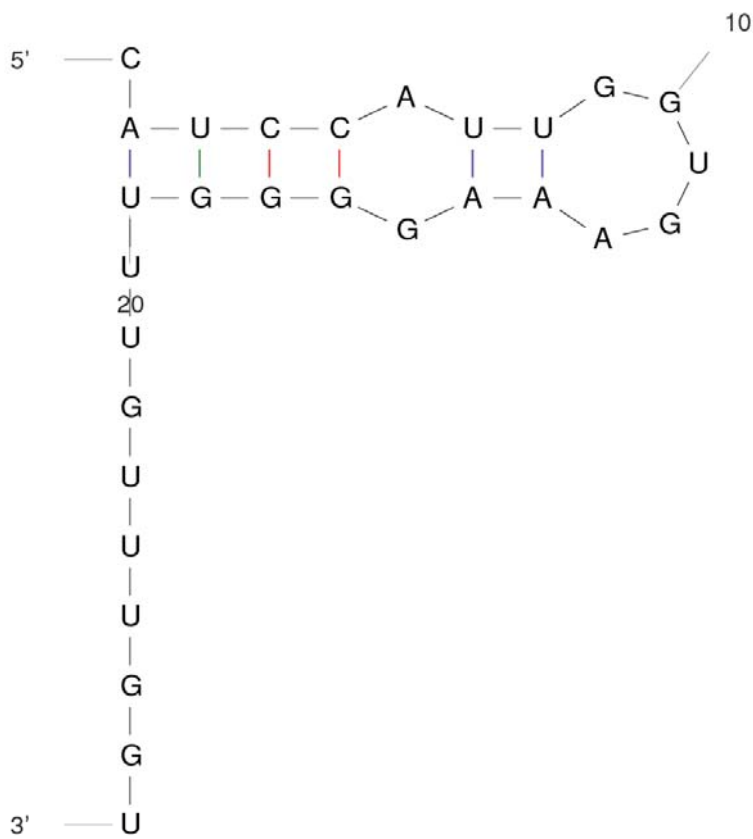

dG = -1.9 A\_laughing\_gull\_Delaware Bay\_296\_1998 H16N3

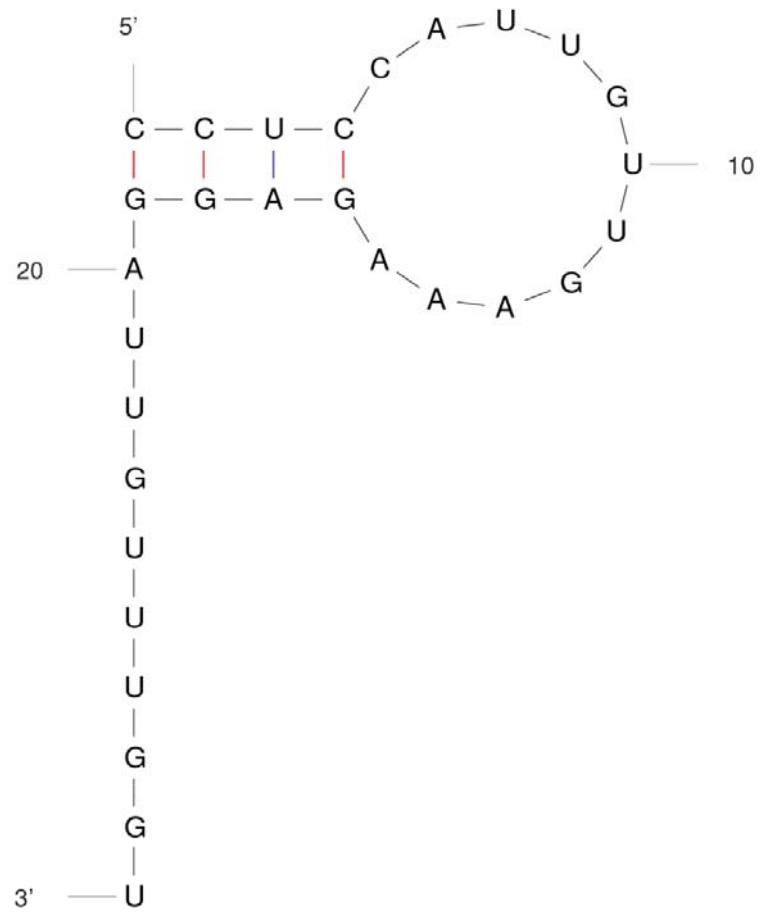

dG = -3.3 A\_black-headed\_gull\_Sweden\_2\_99 H16N3

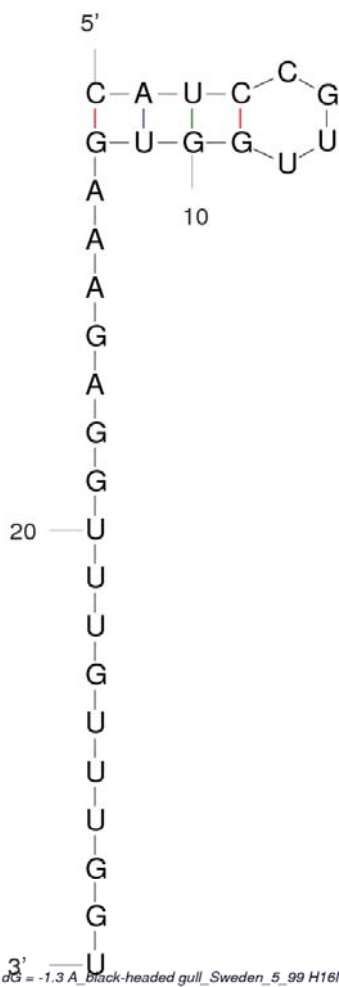

dG = -1.3 A\_black-headed\_gull\_Sweden\_5\_99 H16N3

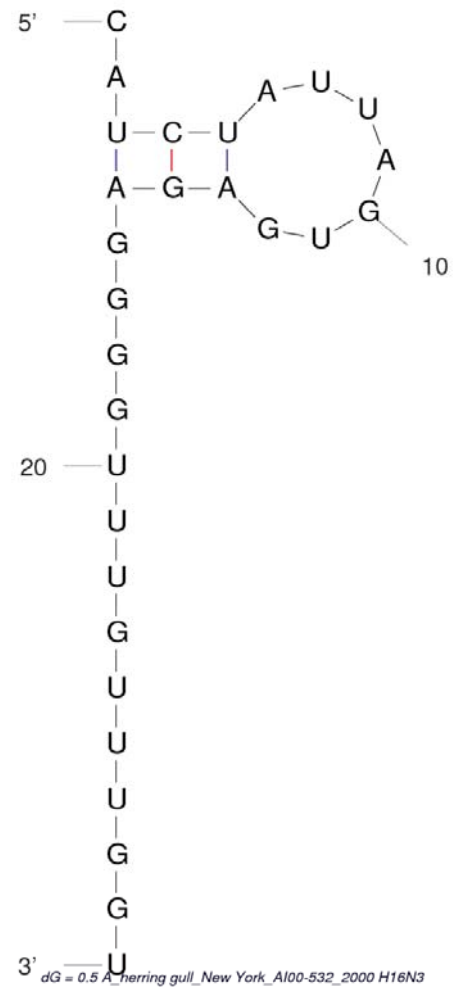

dG = 0.5 A\_herring\_gull\_New York\_AI00-532\_2000 H16N3



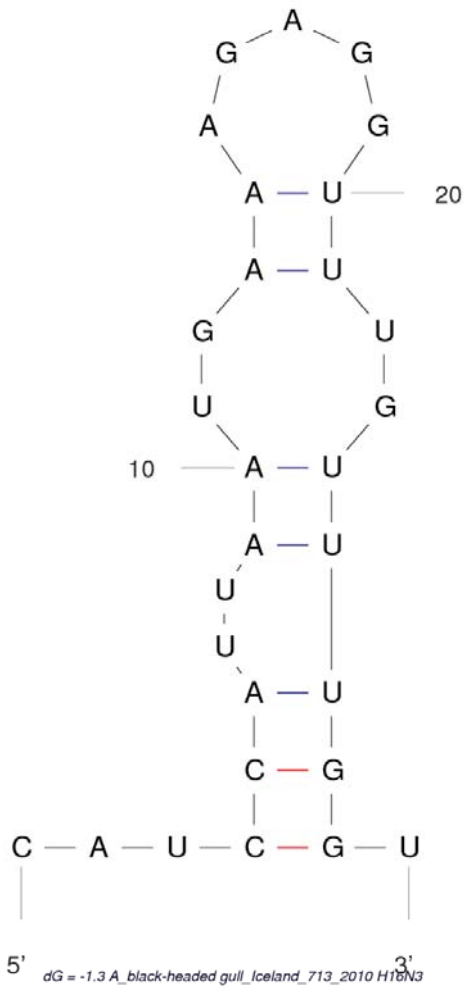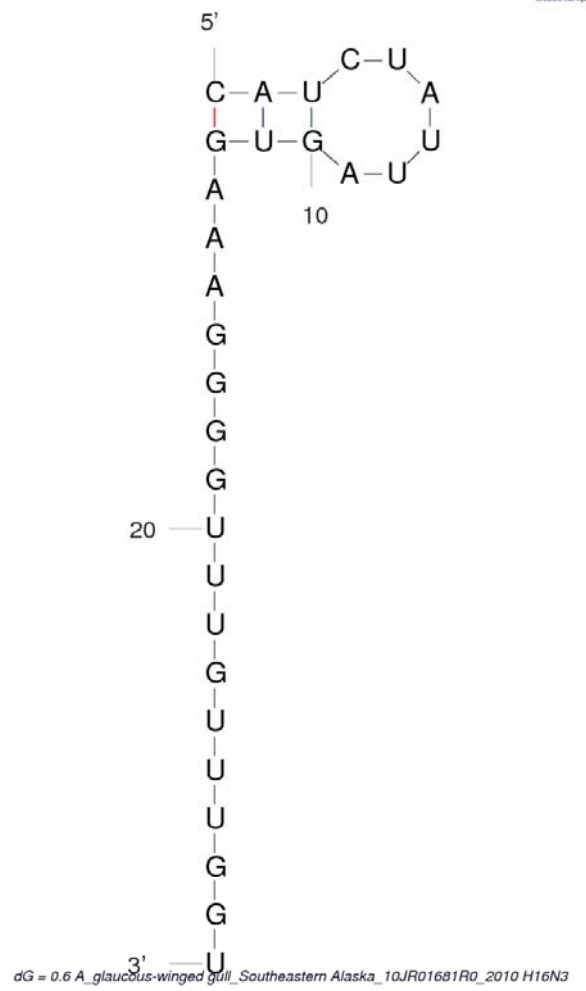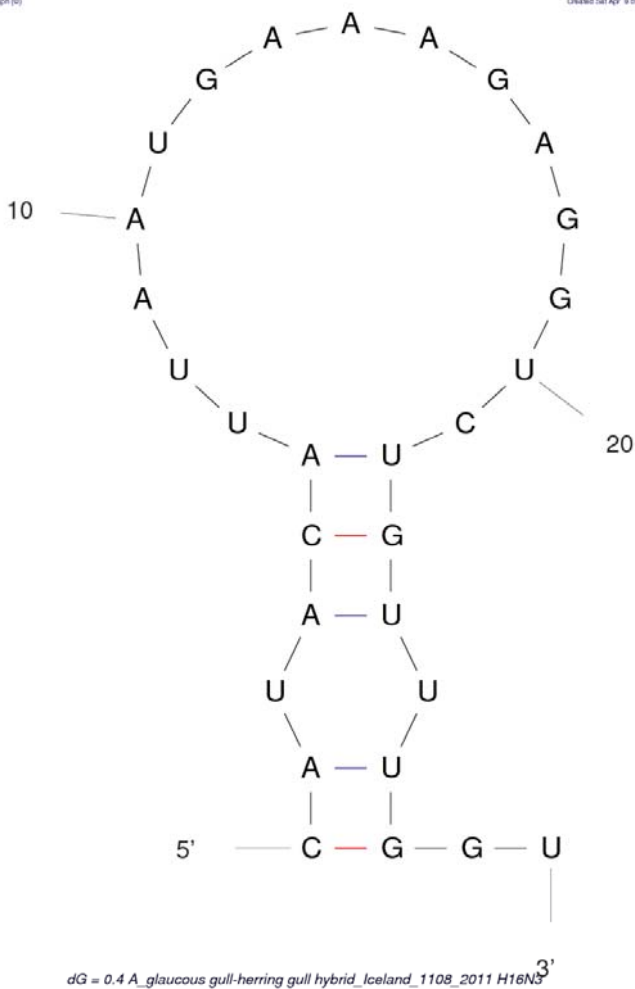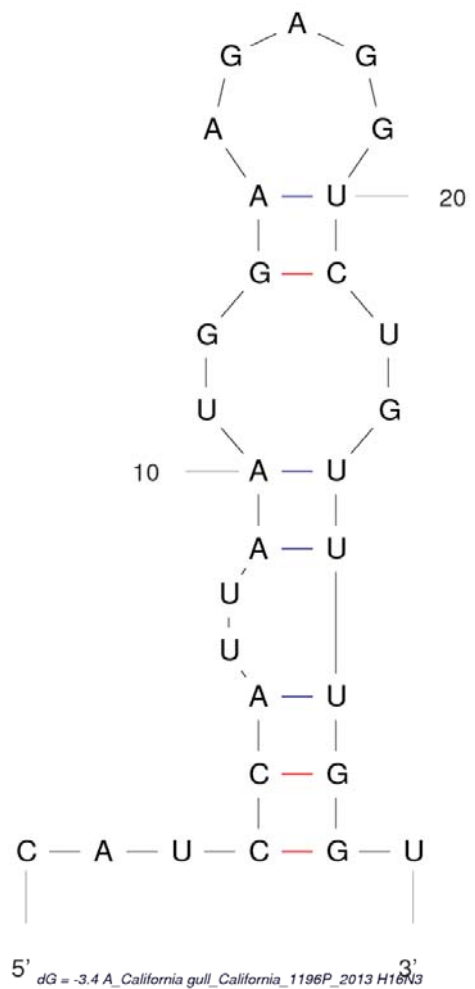

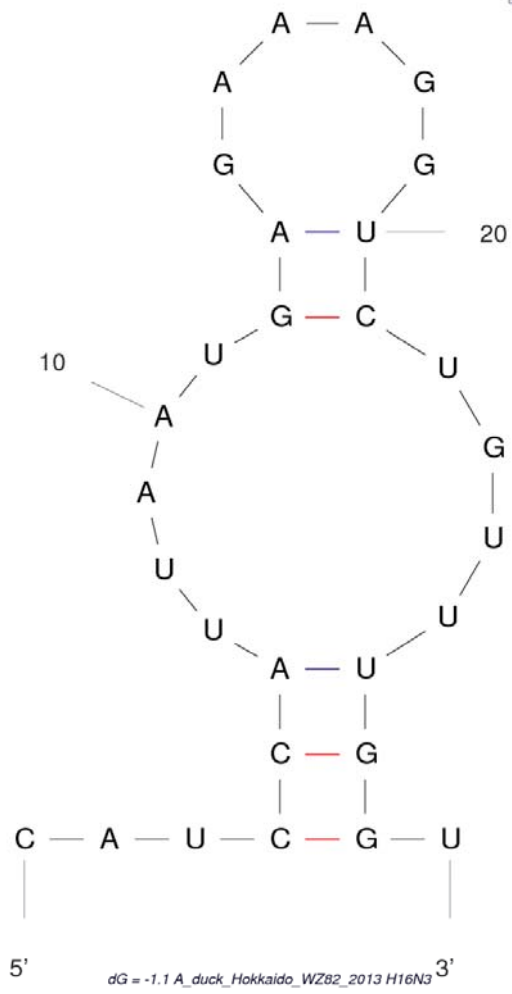

Supplement: mbo001173195sf4.pdf [file mbo001173195sf4.pdf]
