# Supplementary material for: Genetic Predisposition To Acquire a Polybasic Cleavage Site for Highly Pathogenic Avian Influenza Virus Hemagglutinin
Source: PubMed Central journal article supplement (PMC5312086; doi:10.1128/mbio.02298-16), 2017-02-14

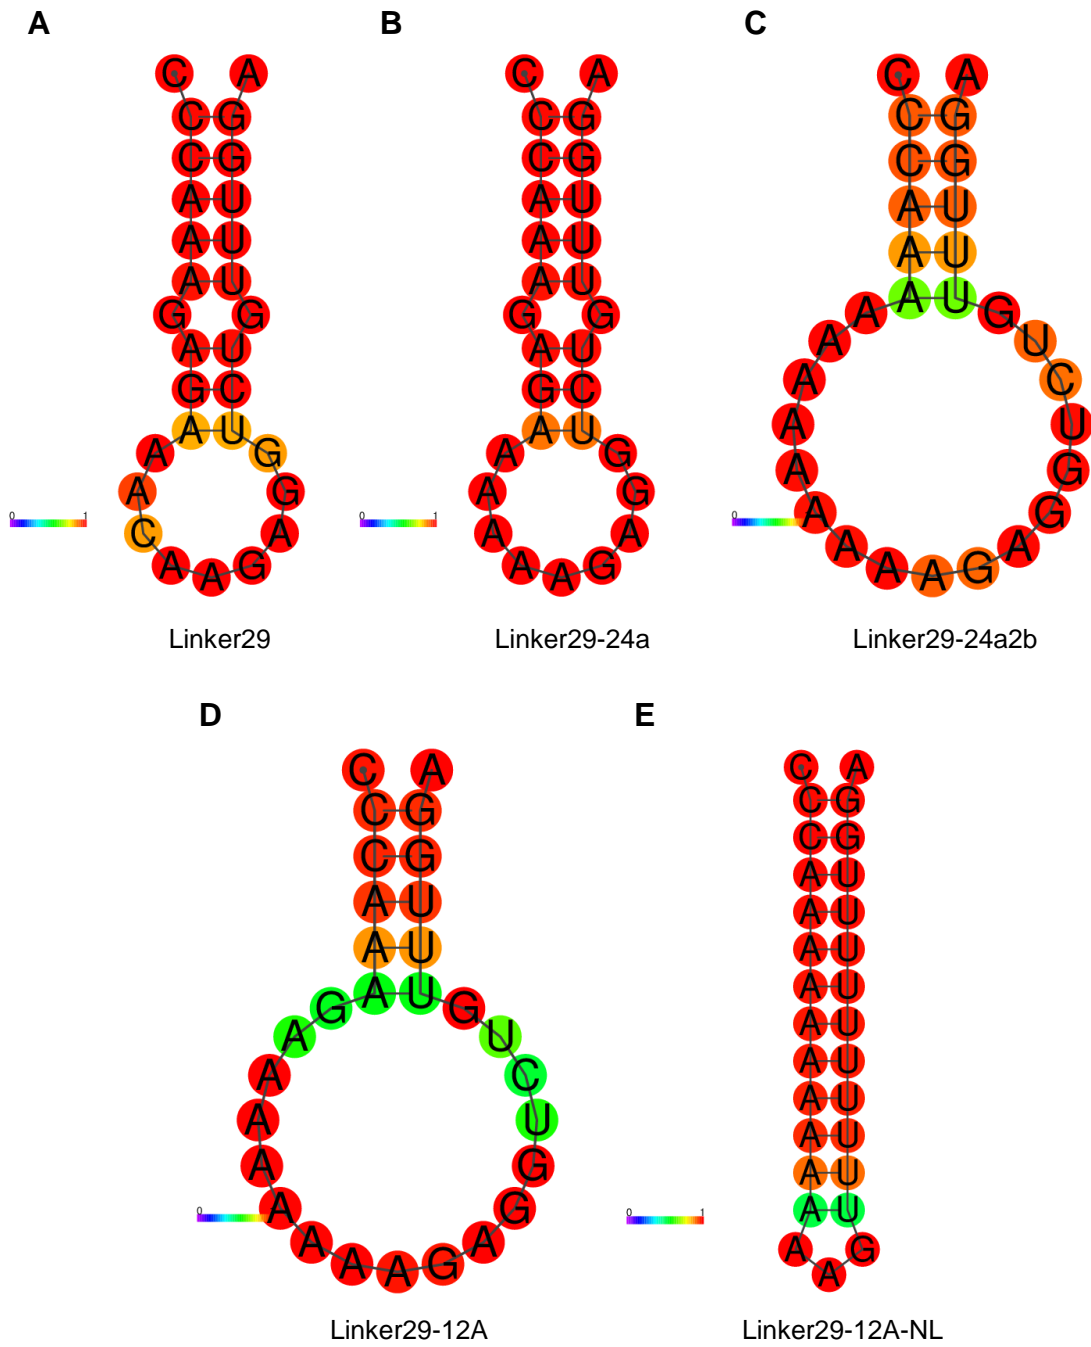

Supplement: mbo001173195sf1.pdf [file mbo001173195sf1.pdf]
